# Supplementary material
Source: publisher figshare collection journal article supplement (https://acs.figshare.com/ndownloader/files/3821578)
Supplement: Supplementary file 1 [file 3821578]

 
data_14041 
  
_audit_creation_method            SHELXL-2014/6 
_chemical_name_systematic         ? 
_chemical_name_common             ? 
_chemical_melting_point           ? 
_chemical_formula_moiety          ? 
_chemical_formula_sum 
 'C31 H26 F6 N4 O2 Pd' 
_chemical_formula_weight          706.96 
  
loop_ 
 _atom_type_symbol 
 _atom_type_description 
 _atom_type_scat_dispersion_real 
 _atom_type_scat_dispersion_imag 
 _atom_type_scat_source 
 'C'  'C'   0.0033   0.0016 
 'International Tables Vol C Tables 4.2.6.8 and 6.1.1.4' 
 'H'  'H'   0.0000   0.0000 
 'International Tables Vol C Tables 4.2.6.8 and 6.1.1.4' 
 'N'  'N'   0.0061   0.0033 
 'International Tables Vol C Tables 4.2.6.8 and 6.1.1.4' 
 'O'  'O'   0.0106   0.0060 
 'International Tables Vol C Tables 4.2.6.8 and 6.1.1.4' 
 'F'  'F'   0.0171   0.0103 
 'International Tables Vol C Tables 4.2.6.8 and 6.1.1.4' 
 'Pd'  'Pd'  -0.9988   1.0072 
 'International Tables Vol C Tables 4.2.6.8 and 6.1.1.4' 
  
_space_group_crystal_system       orthorhombic 
_space_group_IT_number            19 
_space_group_name_H-M_alt         'P 21 21 21' 
_space_group_name_Hall            'P 2ac 2ab' 
  
_shelx_space_group_comment 
; 
The symmetry employed for this shelxl refinement is uniquely defined 
by the following loop, which should always be used as a source of 
symmetry information in preference to the above space-group names. 
They are only intended as comments. 
; 
  
loop_ 
 _space_group_symop_operation_xyz 
 'x, y, z' 
 '-x+1/2, -y, z+1/2' 
 '-x, y+1/2, -z+1/2' 
 'x+1/2, -y+1/2, -z' 
  
_cell_length_a                    10.0820(2) 
_cell_length_b                    14.0144(3) 
_cell_length_c                    20.7098(5) 
_cell_angle_alpha                 90 
_cell_angle_beta                  90 
_cell_angle_gamma                 90 
_cell_volume                      2926.15(11) 
_cell_formula_units_Z             4 
_cell_measurement_temperature     100(2) 
_cell_measurement_reflns_used     9984 
_cell_measurement_theta_min       2.25 
_cell_measurement_theta_max       31.44 
  
_exptl_crystal_description        needle 
_exptl_crystal_colour             yellow 
_exptl_crystal_density_meas       . 
_exptl_crystal_density_method     'not measured' 
_exptl_crystal_density_diffrn     1.605 
_exptl_crystal_F_000              1424 
_exptl_transmission_factor_min    ? 
_exptl_transmission_factor_max    ? 
_exptl_crystal_size_max           0.500 
_exptl_crystal_size_mid           0.140 
_exptl_crystal_size_min           0.100 
_exptl_absorpt_coefficient_mu     0.709 
_shelx_estimated_absorpt_T_min    0.718 
_shelx_estimated_absorpt_T_max    0.932 
_exptl_absorpt_correction_type    multi-scan 
_exptl_absorpt_correction_T_min   0.6474  
_exptl_absorpt_correction_T_max   0.7462  
_exptl_absorpt_process_details    'SADABS (Sheldrick, 2009)' 
_exptl_absorpt_special_details    ? 
_diffrn_ambient_temperature       100(2) 
_diffrn_radiation_wavelength      0.71073 
_diffrn_radiation_type            MoK\a 
_diffrn_source                    'fine-focus sealed tube, graphite' 
_diffrn_measurement_device_type   'Bruker Smart APEX CCD' 
_diffrn_measurement_method        '\f and \w scans' 
_diffrn_detector_area_resol_mean  8.3 
_diffrn_reflns_number             152743 
_diffrn_reflns_av_unetI/netI      0.0170 
_diffrn_reflns_av_R_equivalents   0.0403 
_diffrn_reflns_limit_h_min        -14 
_diffrn_reflns_limit_h_max        14 
_diffrn_reflns_limit_k_min        -20 
_diffrn_reflns_limit_k_max        20 
_diffrn_reflns_limit_l_min        -29 
_diffrn_reflns_limit_l_max        30 
_diffrn_reflns_theta_min          1.755 
_diffrn_reflns_theta_max          30.995 
_diffrn_reflns_theta_full         25.242 
_diffrn_measured_fraction_theta_max   1.000 
_diffrn_measured_fraction_theta_full  1.000 
_diffrn_reflns_Laue_measured_fraction_max    1.000 
_diffrn_reflns_Laue_measured_fraction_full   1.000 
_diffrn_reflns_point_group_measured_fraction_max   1.000 
_diffrn_reflns_point_group_measured_fraction_full  1.000 
_reflns_number_total              9327 
_reflns_number_gt                 9163 
_reflns_threshold_expression      'I > 2\s(I)' 
_reflns_Friedel_coverage          0.802 
_reflns_Friedel_fraction_max      1.000 
_reflns_Friedel_fraction_full     1.000 
  
_reflns_special_details 
; 
 Reflections were merged by SHELXL according to the crystal 
 class for the calculation of statistics and refinement. 
  
 _reflns_Friedel_fraction is defined as the number of unique 
 Friedel pairs measured divided by the number that would be 
 possible theoretically, ignoring centric projections and 
 systematic absences. 
; 
  
_computing_data_collection        'APEX2 v2011.4.0 (Bruker-AXS, 2011)' 
_computing_cell_refinement        'SAINT 7.46A (Bruker-AXS, 2011)' 
_computing_data_reduction         'SAINT 7.46A (Bruker-AXS, 2011)' 
_computing_structure_solution     'SHELXS-97 (Sheldrick, 2008)' 
_computing_structure_refinement   'SHELXL-2014/6 (Sheldrick, 2014)' 
_computing_molecular_graphics     'Bruker SHELXTL' 
_computing_publication_material   'Bruker SHELXTL' 
_refine_special_details 
; 
 'There are signs of high motion in the phenyl ring on C2 (C3 > C8).
 Refinement as disorder does not result in a stable or sensible model
 and was, therefore, abandoned.  
 Similarity restraints on geometry and ADP's were applied to those 
 atoms.
' 
; 
_refine_ls_structure_factor_coef  Fsqd 
_refine_ls_matrix_type            full 
_refine_ls_weighting_scheme       calc 
_refine_ls_weighting_details 
'w=1/[\s^2^(Fo^2^)+(0.0202P)^2^+0.7561P] where P=(Fo^2^+2Fc^2^)/3' 
_atom_sites_solution_primary      direct 
_atom_sites_solution_secondary    difmap 
_atom_sites_solution_hydrogens    mixed 
_refine_ls_hydrogen_treatment     mixed 
_refine_ls_extinction_method      none 
_refine_ls_extinction_coef        . 
_refine_ls_abs_structure_details 
; 
 Flack x determined using 4047 quotients [(I+)-(I-)]/[(I+)+(I-)] 
 (Parsons, Flack and Wagner, Acta Cryst. B69 (2013) 249-259). 
; 
_refine_ls_abs_structure_Flack    -0.011(4) 
_chemical_absolute_configuration  ad  
_refine_ls_number_reflns          9327 
_refine_ls_number_parameters      405 
_refine_ls_number_restraints      122 
_refine_ls_R_factor_all           0.0187 
_refine_ls_R_factor_gt            0.0180 
_refine_ls_wR_factor_ref          0.0429 
_refine_ls_wR_factor_gt           0.0426 
_refine_ls_goodness_of_fit_ref    1.049 
_refine_ls_restrained_S_all       1.050 
_refine_ls_shift/su_max           0.004 
_refine_ls_shift/su_mean          0.000 
  
loop_ 
 _atom_site_label 
 _atom_site_type_symbol 
 _atom_site_fract_x 
 _atom_site_fract_y 
 _atom_site_fract_z 
 _atom_site_U_iso_or_equiv 
 _atom_site_adp_type 
 _atom_site_occupancy 
 _atom_site_site_symmetry_order 
 _atom_site_calc_flag 
 _atom_site_refinement_flags_posn 
 _atom_site_refinement_flags_adp 
 _atom_site_refinement_flags_occupancy 
 _atom_site_disorder_assembly 
 _atom_site_disorder_group 
Pd1 Pd 0.46960(2) 0.39465(2) 0.50638(2) 0.01326(3) Uani 1 1 d . . . . . 
N1 N 0.52119(16) 0.38059(10) 0.60221(7) 0.0164(3) Uani 1 1 d D U . . . 
H1A H 0.471(2) 0.3355(15) 0.6179(11) 0.020 Uiso 1 1 d D U . . . 
H1B H 0.600(2) 0.3573(16) 0.5984(11) 0.020 Uiso 1 1 d D U . . . 
C2 C 0.3912(2) 0.51163(16) 0.65256(11) 0.0287(4) Uani 1 1 d . U . . . 
H2A H 0.3728 0.5369 0.6093 0.043 Uiso 1 1 calc R U . . . 
H2B H 0.3961 0.5645 0.6835 0.043 Uiso 1 1 calc R U . . . 
H2C H 0.3201 0.4679 0.6653 0.043 Uiso 1 1 calc R U . . . 
C1 C 0.5223(2) 0.45852(13) 0.65184(8) 0.0189(3) Uani 1 1 d D U . . . 
H1 H 0.5934 0.5050 0.6398 0.023 Uiso 1 1 calc R U . . . 
C3 C 0.5617(2) 0.41187(15) 0.71531(9) 0.0241(4) Uani 1 1 d D U . . . 
C4 C 0.4777(3) 0.34730(19) 0.74576(11) 0.0394(5) Uani 1 1 d D U . . . 
H4 H 0.3902 0.3380 0.7299 0.047 Uiso 1 1 calc R U . . . 
C5 C 0.5210(4) 0.2962(2) 0.79940(13) 0.0599(9) Uani 1 1 d D U . . . 
H5 H 0.4635 0.2515 0.8195 0.072 Uiso 1 1 calc R U . . . 
C6 C 0.6474(4) 0.3104(3) 0.82346(13) 0.0655(11) Uani 1 1 d D U . . . 
H6 H 0.6766 0.2761 0.8604 0.079 Uiso 1 1 calc R U . . . 
C7 C 0.7304(4) 0.3740(2) 0.79371(14) 0.0573(9) Uani 1 1 d D U . . . 
H7 H 0.8172 0.3839 0.8103 0.069 Uiso 1 1 calc R U . . . 
C8 C 0.6886(3) 0.42429(19) 0.73934(12) 0.0367(5) Uani 1 1 d D U . . . 
H8 H 0.7477 0.4674 0.7186 0.044 Uiso 1 1 calc R U . . . 
N2 N 0.37696(14) 0.26432(10) 0.49935(8) 0.0186(3) Uani 1 1 d . . . . . 
C11 C 0.3645(2) 0.18607(13) 0.54689(9) 0.0211(4) Uani 1 1 d . . . . . 
H11 H 0.3122 0.1347 0.5251 0.025 Uiso 1 1 calc R U . . . 
C12 C 0.5014(2) 0.14315(14) 0.56112(10) 0.0263(4) Uani 1 1 d . . . . . 
H12A H 0.5453 0.1267 0.5204 0.039 Uiso 1 1 calc R U . . . 
H12B H 0.4910 0.0855 0.5874 0.039 Uiso 1 1 calc R U . . . 
H12C H 0.5554 0.1898 0.5846 0.039 Uiso 1 1 calc R U . . . 
C13 C 0.28562(19) 0.21446(14) 0.60647(10) 0.0208(4) Uani 1 1 d . . . . . 
C14 C 0.1975(2) 0.29157(15) 0.60586(10) 0.0239(4) Uani 1 1 d . . . . . 
H14 H 0.1912 0.3303 0.5683 0.029 Uiso 1 1 calc R U . . . 
C15 C 0.1186(2) 0.31257(16) 0.65940(11) 0.0279(4) Uani 1 1 d . . . . . 
H15 H 0.0593 0.3652 0.6579 0.033 Uiso 1 1 calc R U . . . 
C16 C 0.1262(2) 0.25728(17) 0.71468(12) 0.0319(5) Uani 1 1 d . . . . . 
H16 H 0.0736 0.2721 0.7514 0.038 Uiso 1 1 calc R U . . . 
C17 C 0.2119(3) 0.17978(19) 0.71549(13) 0.0416(6) Uani 1 1 d . . . . . 
H17 H 0.2169 0.1407 0.7529 0.050 Uiso 1 1 calc R U . . . 
C18 C 0.2907(3) 0.15845(17) 0.66209(12) 0.0345(5) Uani 1 1 d . . . . . 
H18 H 0.3486 0.1050 0.6636 0.041 Uiso 1 1 calc R U . . . 
C21 C 0.33586(17) 0.24344(13) 0.43932(9) 0.0167(3) Uani 1 1 d . . . . . 
O1 O 0.28592(14) 0.16705(9) 0.41972(7) 0.0209(3) Uani 1 1 d . . . . . 
C22 C 0.35405(17) 0.32320(13) 0.39193(9) 0.0162(3) Uani 1 1 d . . . . . 
C23 C 0.31379(19) 0.32378(14) 0.32753(9) 0.0193(3) Uani 1 1 d . . . . . 
H23 H 0.2696 0.2704 0.3093 0.023 Uiso 1 1 calc R U . . . 
C24 C 0.34011(19) 0.40470(15) 0.29068(9) 0.0219(4) Uani 1 1 d . . . . . 
H24 H 0.3141 0.4065 0.2466 0.026 Uiso 1 1 calc R U . . . 
C25 C 0.4044(2) 0.48339(14) 0.31797(9) 0.0202(3) Uani 1 1 d . . . . . 
H25 H 0.4222 0.5389 0.2931 0.024 Uiso 1 1 calc R U . . . 
C26 C 0.44161(16) 0.47827(12) 0.38237(8) 0.0157(3) Uani 1 1 d . . . . . 
N3 N 0.41623(14) 0.39940(11) 0.41632(7) 0.0152(2) Uani 1 1 d . . . . . 
C27 C 0.51256(17) 0.55469(12) 0.42002(8) 0.0155(3) Uani 1 1 d . . . . . 
O2 O 0.53624(15) 0.63214(8) 0.39401(6) 0.0195(2) Uani 1 1 d . . . . . 
N4 N 0.54682(15) 0.52594(10) 0.48077(7) 0.0155(3) Uani 1 1 d . . . . . 
C31 C 0.62959(16) 0.58931(11) 0.51612(8) 0.0152(3) Uani 1 1 d . . . . . 
C32 C 0.59967(17) 0.68699(12) 0.52190(9) 0.0173(3) Uani 1 1 d . . . . . 
H32 H 0.5200 0.7117 0.5039 0.021 Uiso 1 1 calc R U . . . 
C33 C 0.68704(18) 0.74724(12) 0.55398(9) 0.0174(3) Uani 1 1 d . . . . . 
C34 C 0.80433(18) 0.71357(13) 0.58140(9) 0.0178(3) Uani 1 1 d . . . . . 
H34 H 0.8636 0.7555 0.6029 0.021 Uiso 1 1 calc R U . . . 
C35 C 0.83191(17) 0.61638(13) 0.57624(9) 0.0167(3) Uani 1 1 d . . . . . 
C36 C 0.74629(18) 0.55458(12) 0.54408(9) 0.0165(3) Uani 1 1 d . . . . . 
H36 H 0.7672 0.4886 0.5411 0.020 Uiso 1 1 calc R U . . . 
C37 C 0.6610(2) 0.85298(14) 0.55567(11) 0.0236(4) Uani 1 1 d . . . . . 
F1 F 0.53271(12) 0.87456(8) 0.54478(6) 0.0264(2) Uani 1 1 d . . . . . 
F2 F 0.73188(12) 0.89943(8) 0.51033(7) 0.0357(3) Uani 1 1 d . . . . . 
F3 F 0.69396(13) 0.89242(9) 0.61250(7) 0.0349(3) Uani 1 1 d . . . . . 
C38 C 0.95765(19) 0.57818(13) 0.60551(9) 0.0207(3) Uani 1 1 d . . . . . 
F4 F 1.00763(11) 0.50393(8) 0.57286(6) 0.0251(2) Uani 1 1 d . . . . . 
F5 F 0.93922(14) 0.54665(11) 0.66648(6) 0.0369(3) Uani 1 1 d . . . . . 
F6 F 1.05387(13) 0.64385(9) 0.60860(9) 0.0406(4) Uani 1 1 d . . . . . 
  
loop_ 
 _atom_site_aniso_label 
 _atom_site_aniso_U_11 
 _atom_site_aniso_U_22 
 _atom_site_aniso_U_33 
 _atom_site_aniso_U_23 
 _atom_site_aniso_U_13 
 _atom_site_aniso_U_12 
Pd1 0.01423(5) 0.01077(5) 0.01478(5) -0.00043(4) -0.00158(4) -0.00165(4) 
N1 0.0163(6) 0.0168(7) 0.0161(6) -0.0015(5) -0.0015(6) 0.0001(6) 
C2 0.0279(10) 0.0260(10) 0.0322(11) -0.0056(8) 0.0033(9) 0.0056(8) 
C1 0.0202(8) 0.0192(8) 0.0174(7) -0.0039(6) 0.0006(7) -0.0044(7) 
C3 0.0272(9) 0.0284(10) 0.0167(7) -0.0047(7) -0.0003(6) 0.0012(7) 
C4 0.0407(13) 0.0472(14) 0.0304(10) 0.0110(9) 0.0070(11) 0.0000(12) 
C5 0.085(2) 0.0621(19) 0.0322(12) 0.0189(12) 0.0150(15) 0.0169(19) 
C6 0.106(3) 0.071(2) 0.0195(11) 0.0020(13) -0.0076(15) 0.042(2) 
C7 0.067(2) 0.066(2) 0.0387(14) -0.0210(13) -0.0314(14) 0.0247(16) 
C8 0.0379(12) 0.0388(13) 0.0334(11) -0.0129(9) -0.0129(10) 0.0024(10) 
N2 0.0224(6) 0.0136(6) 0.0198(7) 0.0009(6) -0.0036(6) -0.0051(5) 
C11 0.0277(9) 0.0142(8) 0.0214(8) 0.0021(6) -0.0032(7) -0.0061(7) 
C12 0.0334(12) 0.0197(8) 0.0259(9) 0.0026(7) 0.0037(7) 0.0065(7) 
C13 0.0187(8) 0.0184(8) 0.0254(9) 0.0040(7) -0.0013(7) -0.0072(7) 
C14 0.0215(9) 0.0247(9) 0.0256(9) 0.0046(7) -0.0053(7) -0.0020(7) 
C15 0.0194(9) 0.0292(10) 0.0351(11) 0.0033(9) -0.0007(8) -0.0010(8) 
C16 0.0252(10) 0.0340(12) 0.0365(12) 0.0084(9) 0.0115(9) -0.0037(9) 
C17 0.0467(15) 0.0396(13) 0.0387(13) 0.0211(11) 0.0179(11) 0.0049(11) 
C18 0.0371(12) 0.0284(11) 0.0379(12) 0.0146(9) 0.0118(10) 0.0057(9) 
C21 0.0147(7) 0.0149(8) 0.0206(8) -0.0001(6) -0.0019(6) -0.0014(6) 
O1 0.0214(6) 0.0157(6) 0.0256(7) -0.0023(5) -0.0050(5) -0.0049(5) 
C22 0.0150(7) 0.0155(8) 0.0181(8) -0.0019(6) -0.0016(6) -0.0002(6) 
C23 0.0192(8) 0.0201(8) 0.0188(8) -0.0026(7) -0.0040(7) 0.0001(7) 
C24 0.0234(8) 0.0243(9) 0.0180(7) 0.0005(7) -0.0041(6) 0.0016(8) 
C25 0.0238(9) 0.0187(8) 0.0181(8) 0.0016(6) -0.0014(7) 0.0031(7) 
C26 0.0155(8) 0.0138(7) 0.0178(7) 0.0004(6) -0.0002(6) 0.0017(6) 
N3 0.0150(6) 0.0142(6) 0.0164(6) -0.0006(6) -0.0010(5) -0.0004(6) 
C27 0.0144(7) 0.0135(7) 0.0188(7) -0.0012(6) 0.0030(6) 0.0006(6) 
O2 0.0232(6) 0.0135(5) 0.0218(6) 0.0016(4) 0.0043(6) -0.0001(5) 
N4 0.0165(6) 0.0110(6) 0.0190(6) -0.0006(5) -0.0005(5) -0.0019(5) 
C31 0.0144(6) 0.0123(7) 0.0190(7) -0.0011(6) 0.0009(6) -0.0017(5) 
C32 0.0141(7) 0.0134(7) 0.0246(8) -0.0006(6) -0.0011(6) -0.0003(6) 
C33 0.0156(7) 0.0115(7) 0.0250(9) -0.0018(6) -0.0011(7) -0.0003(6) 
C34 0.0152(7) 0.0141(8) 0.0242(8) -0.0014(6) -0.0012(7) -0.0024(6) 
C35 0.0129(7) 0.0153(8) 0.0220(8) -0.0003(6) 0.0006(6) -0.0014(6) 
C36 0.0164(8) 0.0125(7) 0.0204(8) -0.0003(6) 0.0020(6) -0.0001(6) 
C37 0.0203(9) 0.0137(8) 0.0366(11) -0.0025(7) -0.0061(8) -0.0001(7) 
F1 0.0207(5) 0.0159(5) 0.0426(6) -0.0033(4) -0.0066(6) 0.0039(5) 
F2 0.0289(6) 0.0180(5) 0.0600(8) 0.0104(7) 0.0009(6) -0.0047(5) 
F3 0.0363(7) 0.0188(5) 0.0495(8) -0.0142(6) -0.0170(6) 0.0038(6) 
C38 0.0168(8) 0.0171(7) 0.0282(8) -0.0015(6) -0.0017(7) 0.0005(7) 
F4 0.0213(6) 0.0224(5) 0.0316(6) -0.0010(4) -0.0003(4) 0.0074(4) 
F5 0.0337(7) 0.0535(9) 0.0234(6) 0.0041(6) -0.0032(5) 0.0168(6) 
F6 0.0177(6) 0.0230(6) 0.0810(11) -0.0026(7) -0.0163(7) -0.0028(5) 
  
_geom_special_details 
; 
 All esds (except the esd in the dihedral angle between two l.s. planes) 
 are estimated using the full covariance matrix.  The cell esds are taken 
 into account individually in the estimation of esds in distances, angles 
 and torsion angles; correlations between esds in cell parameters are only 
 used when they are defined by crystal symmetry.  An approximate (isotropic) 
 treatment of cell esds is used for estimating esds involving l.s. planes. 
; 
  
loop_ 
 _geom_bond_atom_site_label_1 
 _geom_bond_atom_site_label_2 
 _geom_bond_distance 
 _geom_bond_site_symmetry_2 
 _geom_bond_publ_flag 
Pd1 N3 1.9424(14) . ? 
Pd1 N2 2.0566(13) . ? 
Pd1 N1 2.0610(14) . ? 
Pd1 N4 2.0670(14) . ? 
N1 C1 1.500(2) . ? 
N1 H1A 0.873(19) . ? 
N1 H1B 0.863(19) . ? 
C2 C1 1.516(3) . ? 
C2 H2A 0.9800 . ? 
C2 H2B 0.9800 . ? 
C2 H2C 0.9800 . ? 
C1 C3 1.521(3) . ? 
C1 H1 1.0000 . ? 
C3 C8 1.384(3) . ? 
C3 C4 1.391(3) . ? 
C4 C5 1.392(4) . ? 
C4 H4 0.9500 . ? 
C5 C6 1.383(6) . ? 
C5 H5 0.9500 . ? 
C6 C7 1.369(5) . ? 
C6 H6 0.9500 . ? 
C7 C8 1.394(4) . ? 
C7 H7 0.9500 . ? 
C8 H8 0.9500 . ? 
N2 C21 1.343(2) . ? 
N2 C11 1.479(2) . ? 
C11 C13 1.521(3) . ? 
C11 C12 1.535(3) . ? 
C11 H11 1.0000 . ? 
C12 H12A 0.9800 . ? 
C12 H12B 0.9800 . ? 
C12 H12C 0.9800 . ? 
C13 C18 1.395(3) . ? 
C13 C14 1.399(3) . ? 
C14 C15 1.396(3) . ? 
C14 H14 0.9500 . ? 
C15 C16 1.385(3) . ? 
C15 H15 0.9500 . ? 
C16 C17 1.388(3) . ? 
C16 H16 0.9500 . ? 
C17 C18 1.394(3) . ? 
C17 H17 0.9500 . ? 
C18 H18 0.9500 . ? 
C21 O1 1.251(2) . ? 
C21 C22 1.499(3) . ? 
C22 N3 1.337(2) . ? 
C22 C23 1.394(2) . ? 
C23 C24 1.392(3) . ? 
C23 H23 0.9500 . ? 
C24 C25 1.398(3) . ? 
C24 H24 0.9500 . ? 
C25 C26 1.387(2) . ? 
C25 H25 0.9500 . ? 
C26 N3 1.335(2) . ? 
C26 C27 1.506(2) . ? 
C27 O2 1.235(2) . ? 
C27 N4 1.366(2) . ? 
N4 C31 1.422(2) . ? 
C31 C36 1.399(2) . ? 
C31 C32 1.407(2) . ? 
C32 C33 1.389(2) . ? 
C32 H32 0.9500 . ? 
C33 C34 1.394(2) . ? 
C33 C37 1.505(3) . ? 
C34 C35 1.394(2) . ? 
C34 H34 0.9500 . ? 
C35 C36 1.392(2) . ? 
C35 C38 1.504(2) . ? 
C36 H36 0.9500 . ? 
C37 F3 1.342(2) . ? 
C37 F1 1.347(2) . ? 
C37 F2 1.348(2) . ? 
C38 F6 1.339(2) . ? 
C38 F4 1.339(2) . ? 
C38 F5 1.350(2) . ? 
  
loop_ 
 _geom_angle_atom_site_label_1 
 _geom_angle_atom_site_label_2 
 _geom_angle_atom_site_label_3 
 _geom_angle 
 _geom_angle_site_symmetry_1 
 _geom_angle_site_symmetry_3 
 _geom_angle_publ_flag 
N3 Pd1 N2 80.60(6) . . ? 
N3 Pd1 N1 176.21(7) . . ? 
N2 Pd1 N1 95.62(6) . . ? 
N3 Pd1 N4 80.06(6) . . ? 
N2 Pd1 N4 160.63(6) . . ? 
N1 Pd1 N4 103.72(6) . . ? 
C1 N1 Pd1 126.31(11) . . ? 
C1 N1 H1A 106.0(15) . . ? 
Pd1 N1 H1A 106.4(15) . . ? 
C1 N1 H1B 109.4(16) . . ? 
Pd1 N1 H1B 100.4(16) . . ? 
H1A N1 H1B 107(2) . . ? 
C1 C2 H2A 109.5 . . ? 
C1 C2 H2B 109.5 . . ? 
H2A C2 H2B 109.5 . . ? 
C1 C2 H2C 109.5 . . ? 
H2A C2 H2C 109.5 . . ? 
H2B C2 H2C 109.5 . . ? 
N1 C1 C2 110.97(16) . . ? 
N1 C1 C3 106.33(15) . . ? 
C2 C1 C3 115.49(16) . . ? 
N1 C1 H1 107.9 . . ? 
C2 C1 H1 107.9 . . ? 
C3 C1 H1 107.9 . . ? 
C8 C3 C4 118.8(2) . . ? 
C8 C3 C1 119.9(2) . . ? 
C4 C3 C1 120.81(19) . . ? 
C3 C4 C5 120.4(3) . . ? 
C3 C4 H4 119.8 . . ? 
C5 C4 H4 119.8 . . ? 
C6 C5 C4 120.2(3) . . ? 
C6 C5 H5 119.9 . . ? 
C4 C5 H5 119.9 . . ? 
C7 C6 C5 119.6(3) . . ? 
C7 C6 H6 120.2 . . ? 
C5 C6 H6 120.2 . . ? 
C6 C7 C8 120.6(3) . . ? 
C6 C7 H7 119.7 . . ? 
C8 C7 H7 119.7 . . ? 
C3 C8 C7 120.4(3) . . ? 
C3 C8 H8 119.8 . . ? 
C7 C8 H8 119.8 . . ? 
C21 N2 C11 115.36(14) . . ? 
C21 N2 Pd1 113.53(12) . . ? 
C11 N2 Pd1 130.55(12) . . ? 
N2 C11 C13 112.99(16) . . ? 
N2 C11 C12 109.98(16) . . ? 
C13 C11 C12 114.64(16) . . ? 
N2 C11 H11 106.2 . . ? 
C13 C11 H11 106.2 . . ? 
C12 C11 H11 106.2 . . ? 
C11 C12 H12A 109.5 . . ? 
C11 C12 H12B 109.5 . . ? 
H12A C12 H12B 109.5 . . ? 
C11 C12 H12C 109.5 . . ? 
H12A C12 H12C 109.5 . . ? 
H12B C12 H12C 109.5 . . ? 
C18 C13 C14 117.74(19) . . ? 
C18 C13 C11 120.25(19) . . ? 
C14 C13 C11 121.78(17) . . ? 
C15 C14 C13 121.17(19) . . ? 
C15 C14 H14 119.4 . . ? 
C13 C14 H14 119.4 . . ? 
C16 C15 C14 120.5(2) . . ? 
C16 C15 H15 119.8 . . ? 
C14 C15 H15 119.8 . . ? 
C15 C16 C17 118.8(2) . . ? 
C15 C16 H16 120.6 . . ? 
C17 C16 H16 120.6 . . ? 
C16 C17 C18 120.9(2) . . ? 
C16 C17 H17 119.6 . . ? 
C18 C17 H17 119.6 . . ? 
C17 C18 C13 120.9(2) . . ? 
C17 C18 H18 119.6 . . ? 
C13 C18 H18 119.6 . . ? 
O1 C21 N2 127.68(17) . . ? 
O1 C21 C22 118.36(16) . . ? 
N2 C21 C22 113.95(15) . . ? 
N3 C22 C23 119.55(17) . . ? 
N3 C22 C21 113.92(15) . . ? 
C23 C22 C21 126.52(16) . . ? 
C24 C23 C22 118.26(17) . . ? 
C24 C23 H23 120.9 . . ? 
C22 C23 H23 120.9 . . ? 
C23 C24 C25 120.61(17) . . ? 
C23 C24 H24 119.7 . . ? 
C25 C24 H24 119.7 . . ? 
C26 C25 C24 118.23(17) . . ? 
C26 C25 H25 120.9 . . ? 
C24 C25 H25 120.9 . . ? 
N3 C26 C25 119.83(16) . . ? 
N3 C26 C27 114.05(15) . . ? 
C25 C26 C27 126.12(16) . . ? 
C26 N3 C22 123.52(15) . . ? 
C26 N3 Pd1 118.75(12) . . ? 
C22 N3 Pd1 117.72(12) . . ? 
O2 C27 N4 127.75(16) . . ? 
O2 C27 C26 119.43(16) . . ? 
N4 C27 C26 112.79(14) . . ? 
C27 N4 C31 116.01(14) . . ? 
C27 N4 Pd1 113.82(11) . . ? 
C31 N4 Pd1 130.17(11) . . ? 
C36 C31 C32 118.92(15) . . ? 
C36 C31 N4 119.31(15) . . ? 
C32 C31 N4 121.73(15) . . ? 
C33 C32 C31 119.75(16) . . ? 
C33 C32 H32 120.1 . . ? 
C31 C32 H32 120.1 . . ? 
C32 C33 C34 121.79(16) . . ? 
C32 C33 C37 119.92(16) . . ? 
C34 C33 C37 118.15(16) . . ? 
C33 C34 C35 117.94(16) . . ? 
C33 C34 H34 121.0 . . ? 
C35 C34 H34 121.0 . . ? 
C36 C35 C34 121.38(16) . . ? 
C36 C35 C38 119.60(16) . . ? 
C34 C35 C38 119.01(16) . . ? 
C35 C36 C31 120.20(16) . . ? 
C35 C36 H36 119.9 . . ? 
C31 C36 H36 119.9 . . ? 
F3 C37 F1 106.99(17) . . ? 
F3 C37 F2 106.30(16) . . ? 
F1 C37 F2 106.50(16) . . ? 
F3 C37 C33 112.50(17) . . ? 
F1 C37 C33 112.62(15) . . ? 
F2 C37 C33 111.51(17) . . ? 
F6 C38 F4 106.59(16) . . ? 
F6 C38 F5 106.26(16) . . ? 
F4 C38 F5 105.64(15) . . ? 
F6 C38 C35 112.67(15) . . ? 
F4 C38 C35 112.96(15) . . ? 
F5 C38 C35 112.17(16) . . ? 
  
loop_ 
 _geom_hbond_atom_site_label_D 
 _geom_hbond_atom_site_label_H 
 _geom_hbond_atom_site_label_A 
 _geom_hbond_distance_DH 
 _geom_hbond_distance_HA 
 _geom_hbond_distance_DA 
 _geom_hbond_angle_DHA 
 _geom_hbond_site_symmetry_A 
N1 H1B O1  0.863(19) 1.942(19) 2.788(2) 167(2) 4_556 
C11 H11 O1  1.00 2.24 2.763(2) 110.8 . 
C36 H36 O1  0.95 2.34 3.220(2) 154.8 4_556 
  
_refine_diff_density_max    0.318 
_refine_diff_density_min   -0.372 
_refine_diff_density_rms    0.049 
  
_shelxl_version_number 2014/6 
  
_shelx_res_file 
; 
TITL 14041 in P2(1)2(1)2(1) 
CELL 0.71073  10.08200  14.01440  20.70980  90.0000  90.0000  90.0000 
ZERR    4.00   0.00020   0.00030   0.00050   0.0000   0.0000   0.0000 
LATT -1 
SYMM 0.5-X, -Y, 0.5+Z 
SYMM -X, 0.5+Y, 0.5-Z 
SYMM 0.5+X, 0.5-Y, -Z 
SFAC C H N O F PD 
UNIT 124 104 16 8 24 4 
TEMP -173 
SIZE 0.10 0.14 0.50 
  
OMIT     3   0   9     ! outlier 
  
WPDB -2 
ACTA 
  
L.S. 10 
BOND $H 
FMAP 2 
PLAN 20 
  
EQIV $1 x+1/2, -y+1/2, -z+1 
HTAB N1 O1_$1 
HTAB C11 O1 
HTAB C36 O1_$1 
htab 
  
simu n1 > c8 
rigu n1 > c8 
  
DFIX 0.91 n1 h1a n1 h1b 
  
WGHT    0.020200    0.756100 
FVAR       0.10036 
PD1   6    0.469603    0.394652    0.506382    11.00000    0.01423    0.01077 = 
         0.01478   -0.00043   -0.00158   -0.00165 
REM  ----------------------------------------------------- 
N1    3    0.521191    0.380592    0.602206    11.00000    0.01632    0.01679 = 
         0.01607   -0.00147   -0.00148    0.00010 
H1A   2    0.470978    0.335506    0.617911    11.00000   -1.20000 
H1B   2    0.599973    0.357265    0.598380    11.00000   -1.20000 
REM  Q1    1   0.4715  0.3368  0.6163  11.00000  0.05    0.73 
REM  Q2    1   0.5979  0.3525  0.6035  11.00000  0.05    0.53 
REM  sadi c1 c2 c1 c2a 
REM  sadi 0.01 c1 c3 c1 c3a 
REM  sadi c3 c4 c3 c8 c3a c4a c3a c8a 
REM  sadi c4 c5 c7 c8 c4a c5a c7a c8a 
REM  sadi c5 c6 c6 c7 c5a c6a c6a c7a 
REM  sadi 0.04 c2 c3 c2a c3a 
REM  sadi 0.04 n1 c3 n1 c3a 
REM  sadi 0.04 n1 c2 n1 c2a 
REM  sadi 0.04 c1 c4 c1 c8 c1 c4a c1 c8a 
REM  sadi 0.04 c3 c5 c3 c7 c3a c5a c3a c7a 
REM  sadi 0.04 c4 c8 c4a c8a 
REM  sadi 0.04 c5 c7 c5a c7a 
REM  sadi 0.04 c4 c6 c6 c8 c4a c6a c6a c8a 
REM  flat c1 c3 c4 c5 c6 c7 c8 
REM  flat c1 c3a c4a c5a c6a c7a c8a 
same c2 c1 c3 c8 < c4 
REM  same 0.01 c2 c1 c3a > c8a 
REM  There are signs of high motion in the phenyl ring on C2 (C3 > C8). 
REM  Refinement as disorder does not result in a stable or sensible model 
REM  and was, therefor, abandoned. 
C2    1    0.391229    0.511625    0.652556    11.00000    0.02789    0.02605 = 
         0.03221   -0.00561    0.00331    0.00557 
AFIX 137 
H2A   2    0.372803    0.536851    0.609343    11.00000   -1.50000 
H2B   2    0.396126    0.564465    0.683460    11.00000   -1.50000 
H2C   2    0.320075    0.467881    0.665326    11.00000   -1.50000 
AFIX   0 
C1    1    0.522256    0.458522    0.651845    11.00000    0.02017    0.01917 = 
         0.01744   -0.00392    0.00056   -0.00437 
AFIX  13 
H1    2    0.593389    0.504951    0.639794    11.00000   -1.20000 
AFIX   0 
REM  part 1 
C3    1    0.561698    0.411873    0.715314    11.00000    0.02717    0.02837 = 
         0.01669   -0.00470   -0.00031    0.00117 
C4    1    0.477675    0.347296    0.745759    11.00000    0.04068    0.04719 = 
         0.03042    0.01100    0.00701   -0.00004 
AFIX  43 
H4    2    0.390240    0.338011    0.729855    11.00000   -1.20000 
AFIX   0 
C5    1    0.520965    0.296188    0.799403    11.00000    0.08527    0.06215 = 
         0.03224    0.01886    0.01497    0.01694 
AFIX  43 
H5    2    0.463509    0.251459    0.819545    11.00000   -1.20000 
AFIX   0 
C6    1    0.647446    0.310372    0.823456    11.00000    0.10568    0.07124 = 
         0.01955    0.00196   -0.00758    0.04231 
AFIX  43 
H6    2    0.676582    0.276146    0.860424    11.00000   -1.20000 
AFIX   0 
C7    1    0.730384    0.373978    0.793709    11.00000    0.06727    0.06595 = 
         0.03874   -0.02099   -0.03135    0.02466 
AFIX  43 
H7    2    0.817163    0.383915    0.810270    11.00000   -1.20000 
AFIX   0 
C8    1    0.688643    0.424294    0.739335    11.00000    0.03794    0.03879 = 
         0.03337   -0.01293   -0.01286    0.00237 
AFIX  43 
H8    2    0.747673    0.467375    0.718635    11.00000   -1.20000 
AFIX   0 
REM  part 2 
REM  C3A   1    0.556989    0.406602    0.714230   -21.00000    0.01747 
REM  C4A   1    0.467674    0.341604    0.740523   -21.00000    0.03533 
REM  C5A   1    0.501634    0.286809    0.794625   -21.00000    0.04459 
REM  C6A   1    0.627019    0.299283    0.823122   -21.00000    0.04806 
REM  C7A   1    0.717520    0.364270    0.797443   -21.00000    0.03756 
REM  C8A   1    0.682787    0.416731    0.741870   -21.00000    0.02857 
REM  part 0 
REM  ----------------------------------------------------- 
N2    3    0.376956    0.264323    0.499354    11.00000    0.02243    0.01356 = 
         0.01976    0.00089   -0.00356   -0.00506 
C11   1    0.364451    0.186066    0.546889    11.00000    0.02773    0.01420 = 
         0.02140    0.00206   -0.00320   -0.00608 
AFIX  13 
H11   2    0.312150    0.134680    0.525114    11.00000   -1.20000 
AFIX   0 
C12   1    0.501403    0.143150    0.561118    11.00000    0.03341    0.01971 = 
         0.02585    0.00262    0.00366    0.00646 
AFIX 137 
H12A  2    0.545327    0.126731    0.520392    11.00000   -1.50000 
H12B  2    0.490981    0.085509    0.587424    11.00000   -1.50000 
H12C  2    0.555359    0.189805    0.584624    11.00000   -1.50000 
AFIX   0 
C13   1    0.285624    0.214460    0.606473    11.00000    0.01867    0.01844 = 
         0.02538    0.00400   -0.00131   -0.00715 
C14   1    0.197502    0.291570    0.605863    11.00000    0.02154    0.02468 = 
         0.02558    0.00464   -0.00530   -0.00204 
AFIX  43 
H14   2    0.191242    0.330324    0.568350    11.00000   -1.20000 
AFIX   0 
C15   1    0.118618    0.312570    0.659397    11.00000    0.01937    0.02923 = 
         0.03513    0.00331   -0.00073   -0.00098 
AFIX  43 
H15   2    0.059302    0.365193    0.657890    11.00000   -1.20000 
AFIX   0 
C16   1    0.126175    0.257276    0.714680    11.00000    0.02521    0.03403 = 
         0.03645    0.00838    0.01151   -0.00373 
AFIX  43 
H16   2    0.073635    0.272127    0.751409    11.00000   -1.20000 
AFIX   0 
C17   1    0.211854    0.179775    0.715492    11.00000    0.04667    0.03957 = 
         0.03867    0.02108    0.01788    0.00486 
AFIX  43 
H17   2    0.216857    0.140749    0.752920    11.00000   -1.20000 
AFIX   0 
C18   1    0.290684    0.158447    0.662091    11.00000    0.03706    0.02840 = 
         0.03795    0.01462    0.01183    0.00567 
AFIX  43 
H18   2    0.348629    0.105039    0.663608    11.00000   -1.20000 
AFIX   0 
REM  ----------------------------------------------------- 
C21   1    0.335861    0.243440    0.439324    11.00000    0.01474    0.01494 = 
         0.02056   -0.00012   -0.00194   -0.00142 
O1    4    0.285919    0.167049    0.419720    11.00000    0.02137    0.01567 = 
         0.02559   -0.00232   -0.00504   -0.00486 
C22   1    0.354049    0.323204    0.391930    11.00000    0.01504    0.01547 = 
         0.01806   -0.00193   -0.00163   -0.00015 
C23   1    0.313793    0.323778    0.327533    11.00000    0.01920    0.02005 = 
         0.01878   -0.00263   -0.00399    0.00013 
AFIX  43 
H23   2    0.269560    0.270356    0.309267    11.00000   -1.20000 
AFIX   0 
C24   1    0.340112    0.404697    0.290684    11.00000    0.02342    0.02433 = 
         0.01796    0.00045   -0.00410    0.00156 
AFIX  43 
H24   2    0.314148    0.406467    0.246604    11.00000   -1.20000 
AFIX   0 
C25   1    0.404415    0.483388    0.317966    11.00000    0.02381    0.01868 = 
         0.01809    0.00164   -0.00135    0.00308 
AFIX  43 
H25   2    0.422158    0.538867    0.293063    11.00000   -1.20000 
AFIX   0 
C26   1    0.441607    0.478269    0.382374    11.00000    0.01550    0.01378 = 
         0.01779    0.00038   -0.00016    0.00169 
N3    3    0.416230    0.399398    0.416320    11.00000    0.01503    0.01415 = 
         0.01637   -0.00059   -0.00097   -0.00037 
C27   1    0.512560    0.554694    0.420016    11.00000    0.01435    0.01347 = 
         0.01876   -0.00116    0.00302    0.00064 
O2    4    0.536243    0.632141    0.394013    11.00000    0.02324    0.01348 = 
         0.02184    0.00161    0.00432   -0.00009 
REM  ----------------------------------------------------- 
N4    3    0.546821    0.525940    0.480771    11.00000    0.01652    0.01102 = 
         0.01895   -0.00062   -0.00051   -0.00190 
C31   1    0.629586    0.589309    0.516115    11.00000    0.01436    0.01231 = 
         0.01899   -0.00110    0.00092   -0.00170 
C32   1    0.599672    0.686993    0.521904    11.00000    0.01407    0.01337 = 
         0.02460   -0.00055   -0.00110   -0.00026 
AFIX  43 
H32   2    0.520032    0.711660    0.503947    11.00000   -1.20000 
AFIX   0 
C33   1    0.687039    0.747244    0.553980    11.00000    0.01561    0.01154 = 
         0.02502   -0.00182   -0.00105   -0.00027 
C34   1    0.804332    0.713569    0.581401    11.00000    0.01516    0.01413 = 
         0.02421   -0.00141   -0.00118   -0.00237 
AFIX  43 
H34   2    0.863636    0.755547    0.602937    11.00000   -1.20000 
AFIX   0 
C35   1    0.831906    0.616381    0.576239    11.00000    0.01289    0.01530 = 
         0.02197   -0.00027    0.00059   -0.00140 
C36   1    0.746294    0.554577    0.544080    11.00000    0.01641    0.01254 = 
         0.02044   -0.00028    0.00197   -0.00010 
AFIX  43 
H36   2    0.767204    0.488624    0.541122    11.00000   -1.20000 
AFIX   0 
C37   1    0.660988    0.852977    0.555673    11.00000    0.02026    0.01374 = 
         0.03665   -0.00249   -0.00607   -0.00006 
F1    5    0.532709    0.874555    0.544782    11.00000    0.02069    0.01586 = 
         0.04265   -0.00334   -0.00660    0.00386 
F2    5    0.731879    0.899433    0.510328    11.00000    0.02895    0.01799 = 
         0.06003    0.01043    0.00087   -0.00473 
F3    5    0.693963    0.892422    0.612495    11.00000    0.03633    0.01879 = 
         0.04949   -0.01423   -0.01696    0.00375 
C38   1    0.957651    0.578180    0.605515    11.00000    0.01680    0.01712 = 
         0.02822   -0.00153   -0.00171    0.00047 
F4    5    1.007630    0.503927    0.572861    11.00000    0.02128    0.02241 = 
         0.03161   -0.00099   -0.00033    0.00743 
F5    5    0.939217    0.546654    0.666480    11.00000    0.03374    0.05354 = 
         0.02343    0.00410   -0.00319    0.01685 
F6    5    1.053870    0.643846    0.608599    11.00000    0.01770    0.02303 = 
         0.08101   -0.00260   -0.01631   -0.00281 
  
HKLF 4 
  
REM  14041 in P2(1)2(1)2(1) 
REM R1 =  0.0180 for    9163 Fo > 4sig(Fo)  and  0.0187 for all    9327 data 
REM    405 parameters refined using    122 restraints 
  
END 
  
WGHT      0.0202      0.7560 
  
REM Instructions for potential hydrogen bonds 
HTAB N1 O1_$1 
HTAB C11 O1 
HTAB C36 O1_$1 
  
REM Highest difference peak  0.318,  deepest hole -0.372,  1-sigma level  0.049 
Q1    1   0.3578  0.2814  0.4171  11.00000  0.05    0.32 
Q2    1   0.4675  0.4392  0.5330  11.00000  0.05    0.31 
Q3    1   0.3712  0.2279  0.5231  11.00000  0.05    0.29 
Q4    1   0.4813  0.3467  0.5357  11.00000  0.05    0.28 
Q5    1   0.3333  0.1983  0.5818  11.00000  0.05    0.28 
Q6    1   0.6103  0.6396  0.5160  11.00000  0.05    0.28 
Q7    1   0.5350  0.5382  0.4487  11.00000  0.05    0.28 
Q8    1   0.5310  0.4821  0.4996  11.00000  0.05    0.27 
Q9    1   0.4767  0.5195  0.4033  11.00000  0.05    0.27 
Q10   1   0.3205  0.3208  0.3643  11.00000  0.05    0.27 
Q11   1   0.3728  0.2408  0.4668  11.00000  0.05    0.27 
Q12   1   0.5828  0.5588  0.4989  11.00000  0.05    0.26 
Q13   1   0.6378  0.7174  0.5376  11.00000  0.05    0.26 
Q14   1   0.4916  0.3880  0.5636  11.00000  0.05    0.26 
Q15   1   0.4433  0.4797  0.3475  11.00000  0.05    0.25 
Q16   1   0.8917  0.5991  0.5882  11.00000  0.05    0.25 
Q17   1   0.4430  0.3952  0.4461  11.00000  0.05    0.25 
Q18   1   0.2917  0.1955  0.6358  11.00000  0.05    0.24 
Q19   1   0.4600  0.4864  0.6495  11.00000  0.05    0.24 
Q20   1   0.3129  0.3587  0.3071  11.00000  0.05    0.24 
; 
_shelx_res_checksum   15701 
  
_shelx_hkl_file 
; 
   1   0   0   -0.48    0.05 
   1   0   0   -0.41    0.06 
   1   0   0   -0.55    0.07 
   1   0   0   -0.52    0.04 
   1   0   0   -0.62    0.05 
   1   0   0   -0.48    0.05 
  -1   0   0   -0.38    0.06 
  -1   0   0   -0.55    0.05 
   1   0   0   -0.40    0.07 
   1   0   0   -0.48    0.05 
   1   0   0   -0.45    0.06 
  -1   0   0   -0.28    0.07 
  -1   0   0   -0.48    0.06 
  -1   0   0   -0.51    0.05 
  -1   0   0   -0.53    0.06 
  -1   0   0   -0.50    0.06 
   2   0   0  463.75   12.98 
   2   0   0  455.86   12.94 
   2   0   0  444.89   12.93 
  -2   0   0  462.23   12.98 
  -2   0   0  452.71   12.94 
  -2   0   0  450.59   12.95 
  -2   0   0  448.91   12.96 
  -2   0   0  462.52   12.99 
  -2   0   0  466.50   12.94 
  -2   0   0  464.82   12.93 
   2   0   0  452.08   12.93 
   2   0   0  479.38   12.91 
   2   0   0  470.82   12.97 
   2   0   0  451.67   13.01 
   2   0   0  474.14   12.96 
  -3   0   0   -0.25    0.10 
  -3   0   0   -0.08    0.11 
  -3   0   0    0.14    0.10 
   3   0   0   -0.17    0.08 
   3   0   0   -0.09    0.10 
   3   0   0   -0.07    0.10 
   3   0   0    0.01    0.09 
   3   0   0   -0.14    0.08 
   3   0   0    0.15    0.15 
  -3   0   0   -0.06    0.10 
  -3   0   0   -0.11    0.12 
  -3   0   0   -0.22    0.09 
  -3   0   0   -0.11    0.10 
   3   0   0    0.02    0.12 
   3   0   0   -0.24    0.11 
   3   0   0   -0.23    0.10 
   4   0   0  331.38    9.62 
   4   0   0  343.80    9.65 
   4   0   0  330.23    9.55 
  -4   0   0  341.15    9.67 
  -4   0   0  339.40    9.55 
  -4   0   0  328.53    9.70 
  -4   0   0  336.02    9.73 
   4   0   0  337.56    9.75 
   4   0   0  347.90    9.66 
   4   0   0  341.44    9.61 
  -4   0   0  325.80    9.61 
   4   0   0  332.35    9.70 
   4   0   0  327.85    9.69 
  -4   0   0  325.81    9.64 
   5   0   0    0.03    0.11 
   5   0   0   -0.03    0.10 
   5   0   0   -0.08    0.12 
   5   0   0    0.13    0.16 
   5   0   0   -0.02    0.15 
   5   0   0    0.15    0.13 
  -5   0   0   -0.03    0.16 
   5   0   0   -0.10    0.10 
   5   0   0   -0.09    0.13 
  -5   0   0   -0.14    0.13 
  -5   0   0    0.12    0.13 
  -5   0   0   -0.02    0.11 
  -5   0   0   -0.07    0.10 
  -5   0   0    0.05    0.17 
  -6   0   0   89.91    3.12 
   6   0   0   92.27    3.21 
   6   0   0   95.88    3.29 
  -6   0   0   93.80    3.23 
   6   0   0  100.98    3.18 
   6   0   0   94.05    3.21 
   6   0   0   90.91    3.07 
   6   0   0   96.70    3.02 
  -6   0   0   95.71    3.19 
  -6   0   0   93.20    3.00 
  -6   0   0   89.85    3.09 
   6   0   0  102.05    3.18 
   6   0   0   96.16    3.11 
  -6   0   0   93.26    3.24 
  -7   0   0   -0.10    0.19 
   7   0   0   -0.14    0.20 
   7   0   0   -0.11    0.13 
   7   0   0    0.05    0.18 
   7   0   0    0.16    0.15 
   7   0   0    0.12    0.16 
   7   0   0   -0.05    0.15 
  -7   0   0    0.11    0.15 
  -7   0   0   -0.28    0.17 
  -7   0   0    0.09    0.18 
  -8   0   0    1.76    0.34 
   8   0   0    1.62    0.33 
   8   0   0    1.37    0.39 
   8   0   0    1.50    0.42 
  -8   0   0    1.98    0.42 
   8   0   0    1.59    0.43 
   8   0   0    2.16    0.41 
  -8   0   0    1.98    0.48 
   8   0   0    1.61    0.38 
  -8   0   0    1.29    0.38 
   9   0   0    0.04    0.20 
  -9   0   0   -0.14    0.14 
  -9   0   0    0.16    0.27 
  -9   0   0    0.27    0.30 
   9   0   0    0.15    0.28 
   9   0   0   -0.23    0.21 
  -9   0   0    0.38    0.30 
   9   0   0   -0.21    0.22 
  -9   0   0   -0.01    0.22 
   9   0   0   -0.05    0.19 
  10   0   0    4.41    0.62 
 -10   0   0    4.35    0.73 
  10   0   0    3.54    0.66 
 -10   0   0    4.51    0.75 
 -10   0   0    5.52    0.75 
 -10   0   0    4.59    0.76 
  10   0   0    4.48    0.78 
  10   0   0    4.67    0.67 
  10   0   0    5.34    0.82 
  11   0   0    0.04    0.28 
  11   0   0   -0.10    0.27 
 -11   0   0   -0.21    0.28 
 -11   0   0    0.00    0.30 
 -11   0   0    0.07    0.27 
  11   0   0   -0.02    0.27 
  11   0   0   -0.14    0.25 
 -11   0   0   -0.17    0.28 
  11   0   0    0.04    0.23 
  12   0   0   27.89    1.61 
  12   0   0   31.57    1.90 
 -12   0   0   31.66    1.94 
  12   0   0   28.14    1.63 
  12   0   0   32.48    1.88 
 -12   0   0   29.83    1.82 
 -12   0   0   30.64    1.89 
  12   0   0   31.90    1.96 
 -12   0   0   32.51    1.80 
  13   0   0   -0.50    0.39 
 -13   0   0   -0.29    0.35 
  13   0   0   -0.31    0.32 
 -13   0   0    0.09    0.39 
 -13   0   0    0.38    0.38 
  13   0   0   -0.02    0.37 
 -13   0   0    1.25    0.54 
  13   0   0   -0.04    0.35 
  13   0   0   -0.16    0.27 
  14   0   0   21.48    1.45 
  14   0   0   19.19    1.54 
 -14   0   0   18.30    1.90 
 -14   0   0   21.20    1.61 
 -14   0   0   20.45    1.62 
  14   0   0   21.51    2.12 
  14   0   0   20.38    1.39 
  14   0   0   19.31    1.91 
  14   0   0   18.24    1.33 
 -14   0   0   21.78    2.09 
   0  -1   0    0.00    0.03 
   0   1   0    0.02    0.03 
   0  -1   0    0.02    0.03 
   0   1   0    0.04    0.03 
   0   1   0    0.04    0.03 
   0   1   0    0.05    0.04 
   0   1   0    0.03    0.02 
   0  -1   0    0.02    0.03 
   0  -1   0    0.11    0.04 
  -1  -1   0   -0.47    0.07 
  -1  -1   0   -0.37    0.05 
   1  -1   0   -0.43    0.06 
  -1   1   0   -0.44    0.08 
  -1  -1   0   -0.39    0.07 
  -1   1   0   -0.35    0.06 
  -1   1   0   -0.34    0.06 
  -1   1   0   -0.39    0.07 
  -1  -1   0   -0.43    0.08 
  -1  -1   0   -0.48    0.07 
  -1   1   0   -0.37    0.06 
   1  -1   0   -0.48    0.07 
  -1   1   0   -0.41    0.07 
   1   1   0   -0.43    0.06 
   1   1   0   -0.32    0.08 
   1  -1   0   -0.31    0.06 
   1   1   0   -0.31    0.08 
   1   1   0   -0.42    0.07 
   1   1   0   -0.29    0.05 
   1   1   0   -0.40    0.07 
   1  -1   0   -0.33    0.09 
   1  -1   0   -0.40    0.06 
   1   1   0   -0.27    0.08 
  -1  -1   0   -0.35    0.07 
  -1   1   0   -0.32    0.07 
   1  -1   0   -0.50    0.07 
   1  -1   0   -0.25    0.07 
   1  -1   0   -0.39    0.07 
   1  -1   0   -0.30    0.07 
  -1  -1   0   -0.44    0.07 
  -2  -1   0  254.07    7.17 
  -2  -1   0  245.12    7.16 
  -2   1   0  250.99    7.06 
  -2  -1   0  248.03    7.20 
  -2  -1   0  245.04    7.18 
  -2  -1   0  250.38    7.19 
   2   1   0  251.04    7.08 
   2  -1   0  250.56    7.17 
   2  -1   0  249.51    7.20 
   2  -1   0  240.02    7.13 
   2  -1   0  257.35    7.19 
   2  -1   0  253.30    7.15 
   2  -1   0  249.39    7.14 
  -2   1   0  244.44    7.20 
  -2  -1   0  246.87    7.18 
  -2  -1   0  240.89    7.17 
   2   1   0  252.68    7.08 
  -2   1   0  260.61    7.21 
  -2   1   0  256.73    7.06 
   2   1   0  261.00    7.18 
   2   1   0  246.47    7.17 
   2   1   0  256.01    7.18 
  -2   1   0  258.78    7.14 
  -2   1   0  247.27    7.23 
   2  -1   0  252.72    7.24 
   2   1   0  266.53    7.22 
   2  -1   0  260.20    7.17 
   2   1   0  259.48    7.22 
   2   1   0  246.49    7.20 
  -2   1   0  245.53    7.13 
   2   1   0  257.26    7.19 
  -3   1   0   98.01    2.79 
   3   1   0   95.28    2.98 
   3  -1   0   96.17    2.88 
  -3  -1   0   92.29    2.94 
  -3   1   0   95.21    2.89 
  -3  -1   0   96.88    2.96 
  -3  -1   0   97.04    2.97 
  -3  -1   0   93.18    2.91 
  -3  -1   0   89.89    2.92 
  -3  -1   0   92.51    2.93 
   3  -1   0   94.32    2.93 
  -3   1   0   92.34    2.87 
   3  -1   0   96.86    2.97 
   3   1   0   95.17    2.91 
   3  -1   0   98.12    2.91 
   3  -1   0   96.22    2.89 
   3   1   0   98.90    2.81 
  -3  -1   0   95.81    2.90 
   3   1   0   98.02    2.93 
  -3   1   0   94.10    3.00 
  -3   1   0   96.71    2.72 
   3   1   0   94.65    2.91 
   3   1   0   92.96    2.97 
   3  -1   0  100.43    2.92 
  -3   1   0   95.26    2.97 
   3  -1   0   92.87    2.99 
   3   1   0   96.26    2.93 
   3   1   0   99.16    2.75 
   3   1   0   95.17    2.97 
   3  -1   0   98.57    2.92 
  -3   1   0   94.88    2.97 
   4  -1   0   11.13    0.65 
  -4   1   0   10.82    0.63 
   4   1   0   11.39    0.63 
   4   1   0   11.11    0.39 
   4   1   0   11.07    0.64 
   4   1   0   10.82    0.58 
   4   1   0   11.28    0.50 
  -4   1   0   11.93    0.66 
   4  -1   0   11.71    0.59 
  -4  -1   0   10.75    0.60 
   4  -1   0   11.07    0.57 
   4  -1   0   11.71    0.59 
  -4   1   0   11.26    0.65 
   4  -1   0   11.02    0.60 
  -4  -1   0   11.52    0.62 
  -4  -1   0   11.55    0.63 
  -4   1   0   11.13    0.56 
   4  -1   0   10.80    0.61 
   4   1   0   11.00    0.64 
  -4   1   0   11.89    0.49 
   4   1   0   11.38    0.59 
   4   1   0   10.45    0.59 
  -4  -1   0   11.31    0.61 
  -4  -1   0   10.48    0.55 
  -4  -1   0   10.56    0.61 
   4   1   0   11.19    0.58 
   4  -1   0   11.55    0.57 
   4  -1   0   10.24    0.54 
  -4  -1   0   11.21    0.59 
  -4   1   0   10.99    0.57 
  -5   1   0   13.83    0.78 
   5  -1   0   14.08    0.70 
   5  -1   0   12.60    0.69 
   5   1   0   14.63    0.72 
   5  -1   0   12.86    0.74 
  -5  -1   0   13.56    0.78 
  -5  -1   0   13.62    0.72 
   5  -1   0   14.22    0.82 
  -5  -1   0   13.08    0.76 
   5   1   0   13.65    0.78 
   5   1   0   14.08    0.71 
  -5   1   0   12.58    0.77 
  -5   1   0   12.47    0.70 
  -5   1   0   13.29    0.69 
   5   1   0   14.77    0.74 
  -5   1   0   14.11    0.61 
  -5   1   0   13.68    0.79 
  -5  -1   0   12.87    0.74 
  -5  -1   0   14.47    0.75 
   5   1   0   14.67    0.63 
  -5  -1   0   13.43    0.76 
   5  -1   0   13.69    0.72 
  -5  -1   0   12.82    0.67 
   5  -1   0   13.66    0.76 
   5  -1   0   15.37    0.75 
   5  -1   0   14.33    0.70 
   5   1   0   13.66    0.80 
   5   1   0   13.27    0.77 
   6  -1   0   95.76    2.95 
   6   1   0   81.79    3.01 
   6  -1   0   84.73    3.05 
  -6   1   0   83.74    3.00 
  -6  -1   0   86.17    2.92 
   6   1   0   86.01    3.02 
   6   1   0   88.62    2.90 
   6  -1   0   91.10    2.93 
  -6  -1   0   83.86    2.99 
  -6  -1   0   88.20    3.03 
  -6  -1   0   88.57    2.96 
  -6   1   0   83.78    2.87 
   6  -1   0   86.31    3.00 
  -6   1   0   87.89    3.06 
  -6   1   0   86.23    2.73 
   6  -1   0   87.05    2.97 
  -6   1   0   86.00    3.05 
  -6  -1   0   85.70    2.84 
  -6  -1   0   92.25    3.02 
   6   1   0   88.41    2.75 
   6   1   0   85.23    2.89 
   6  -1   0   88.20    2.86 
   6   1   0   84.40    3.00 
   6  -1   0   84.88    2.88 
  -6  -1   0   84.98    2.97 
   6  -1   0   89.71    2.87 
  -7  -1   0   30.37    1.45 
   7  -1   0   31.52    1.46 
   7  -1   0   32.16    1.32 
   7  -1   0   30.70    1.43 
   7   1   0   31.64    1.21 
  -7  -1   0   29.49    1.41 
  -7   1   0   30.47    1.20 
  -7  -1   0   30.80    1.29 
   7   1   0   31.36    1.46 
  -7   1   0   30.15    1.35 
   7  -1   0   30.77    1.51 
   7   1   0   31.05    1.47 
   7   1   0   29.11    1.33 
  -7  -1   0   30.76    1.47 
   7   1   0   31.86    1.51 
  -7   1   0   29.80    1.47 
   7  -1   0   30.32    1.31 
  -7   1   0   30.91    1.51 
   7   1   0   30.67    1.36 
  -7  -1   0   30.52    1.38 
   7  -1   0   29.69    1.33 
   8  -1   0   41.16    1.84 
   8  -1   0   38.10    1.64 
   8  -1   0   40.18    1.68 
  -8  -1   0   40.17    1.84 
  -8  -1   0   38.72    1.77 
   8  -1   0   39.08    1.77 
  -8  -1   0   39.28    1.81 
   8   1   0   38.67    1.53 
   8  -1   0   38.06    1.60 
   8   1   0   41.39    1.85 
   8   1   0   40.52    1.70 
   8   1   0   40.54    1.83 
  -8   1   0   38.74    1.82 
  -8   1   0   42.02    1.90 
   8   1   0   39.88    1.86 
   8  -1   0   40.80    1.90 
  -8   1   0   40.80    1.52 
  -8  -1   0   38.77    1.72 
  -8   1   0   38.39    1.69 
  -8  -1   0   40.61    1.63 
   8   1   0   39.50    1.70 
   9   1   0   16.47    1.01 
   9  -1   0   16.00    1.08 
   9   1   0   16.82    1.16 
  -9   1   0   17.20    1.06 
  -9   1   0   17.15    1.15 
  -9  -1   0   15.68    1.10 
   9  -1   0   16.85    0.99 
   9   1   0   16.08    1.12 
   9  -1   0   16.76    1.02 
  -9  -1   0   14.73    1.09 
  -9  -1   0   17.36    1.08 
  -9  -1   0   16.01    1.09 
   9  -1   0   15.29    1.10 
   9  -1   0   15.69    1.16 
   9   1   0   16.50    1.14 
   9   1   0   16.30    1.03 
  -9  -1   0   16.90    0.95 
  -9   1   0   16.15    1.14 
  10  -1   0   22.23    1.39 
  10  -1   0   22.69    1.45 
  10   1   0   21.55    1.37 
 -10  -1   0   23.23    1.44 
 -10  -1   0   20.82    1.30 
 -10   1   0   19.06    1.36 
 -10   1   0   20.29    1.39 
  10   1   0   22.58    1.44 
 -10  -1   0   22.76    1.43 
 -10   1   0   21.23    1.28 
  10   1   0   21.55    1.40 
  10  -1   0   21.47    1.23 
  10   1   0   20.78    1.23 
  10  -1   0   20.07    1.30 
 -10  -1   0   23.39    1.38 
  10  -1   0   20.75    1.20 
  10   1   0   20.89    1.24 
 -11  -1   0   13.41    1.38 
 -11  -1   0   13.04    1.07 
 -11   1   0   13.26    1.36 
 -11  -1   0   11.19    1.22 
 -11   1   0   12.86    1.37 
 -11   1   0   15.96    1.54 
 -11   1   0   13.19    1.26 
  11  -1   0   15.19    1.40 
  11   1   0   13.96    1.02 
  11  -1   0   12.94    1.41 
  11   1   0   11.55    1.28 
  11  -1   0   12.61    1.30 
  11   1   0   13.03    1.37 
  11  -1   0   12.32    0.95 
 -11  -1   0   12.75    1.36 
  11   1   0   12.82    1.01 
  11   1   0   10.70    1.27 
  11  -1   0   13.11    0.99 
  12   1   0    1.88    0.62 
  12  -1   0    3.94    0.80 
  12   1   0    3.77    0.75 
  12   1   0    2.41    0.62 
 -12  -1   0    2.25    0.63 
 -12  -1   0    3.21    0.74 
 -12   1   0    2.77    0.69 
 -12   1   0    3.02    0.69 
  12  -1   0    4.18    0.79 
  12  -1   0    2.86    0.63 
 -12  -1   0    2.56    0.66 
  12  -1   0    2.02    0.67 
  12   1   0    2.60    0.57 
  12   1   0    2.29    0.55 
 -12  -1   0    3.94    0.79 
 -12   1   0    2.69    0.68 
  12  -1   0    2.46    0.55 
 -12   1   0    3.11    0.73 
 -13   1   0    6.49    1.08 
  13  -1   0    6.76    0.93 
  13   1   0    7.28    0.99 
 -13  -1   0    7.70    1.15 
  13  -1   0    6.06    1.03 
 -13  -1   0    6.94    1.06 
  13   1   0    8.67    1.24 
  13   1   0    6.75    1.12 
  13  -1   0    8.12    1.12 
  13  -1   0    6.70    1.12 
  13   1   0    5.89    0.87 
 -13  -1   0    6.97    1.06 
 -13   1   0    6.63    1.06 
 -13   1   0    7.22    1.18 
  13   1   0    6.96    1.05 
  13  -1   0    5.61    0.80 
 -13   1   0    8.17    1.12 
  13  -1   0    6.69    0.87 
 -13  -1   0    8.31    1.18 
  14  -1   0    3.09    0.90 
 -14   1   0    4.08    0.88 
  14  -1   0    3.03    0.76 
 -14   1   0    5.16    1.01 
  14  -1   0    3.77    0.70 
  14   1   0    2.72    0.77 
  14  -1   0    3.48    0.70 
 -14  -1   0    4.00    0.85 
 -14  -1   0    5.56    0.98 
  14   1   0    2.88    0.66 
  14  -1   0    6.22    1.10 
 -14   1   0    3.47    0.91 
 -14   1   0    4.17    0.97 
  14  -1   0    4.25    0.79 
 -14  -1   0    3.95    0.88 
  14   1   0    3.40    0.78 
  14   1   0    4.43    0.79 
 -14  -1   0    4.04    0.86 
  14   1   0    3.38    0.81 
   0  -2   0   -0.66    0.07 
   0  -2   0   -0.18    0.12 
   0  -2   0   -0.35    0.10 
   0   2   0   -0.54    0.08 
   0   2   0   -0.53    0.08 
   0   2   0   -0.50    0.10 
   0   2   0   -0.48    0.05 
   0   2   0   -0.53    0.07 
   0   2   0   -0.40    0.10 
   0   2   0   -0.37    0.12 
   0  -2   0   -0.61    0.07 
   0  -2   0   -0.45    0.09 
   0  -2   0   -0.60    0.07 
   0  -2   0   -0.41    0.10 
   1  -2   0  973.30   27.07 
   1  -2   0  974.79   26.85 
  -1  -2   0  944.80   27.21 
  -1  -2   0  988.96   27.36 
   1  -2   0  970.07   27.03 
   1   2   0  981.82   26.94 
   1  -2   0  953.50   27.06 
  -1   2   0  952.77   27.14 
  -1   2   0  959.78   27.20 
   1  -2   0  963.75   27.06 
   1  -2   0  952.73   27.29 
   1   2   0  933.23   27.37 
   1  -2   0  919.31   27.43 
  -1  -2   0 1000.00   27.12 
  -1  -2   0  938.81   26.94 
  -1   2   0  926.77   27.23 
   1   2   0  970.18   27.29 
  -1  -2   0  945.97   27.31 
  -1   2   0  975.42   26.96 
  -1   2   0  950.46   27.22 
   1  -2   0  975.80   27.30 
  -1  -2   0  982.13   27.24 
   1  -2   0  963.93   27.19 
   1   2   0  953.78   27.27 
  -1   2   0  964.63   27.11 
   1   2   0  932.36   26.97 
   1   2   0  952.14   27.14 
  -1  -2   0  964.25   27.13 
   1  -2   0  947.15   26.92 
   1   2   0  932.72   27.39 
   1  -2   0  960.45   26.83 
  -2   2   0  443.25   12.27 
   2  -2   0  446.80   12.38 
   2   2   0  434.15   12.34 
  -2  -2   0  451.57   12.36 
   2  -2   0  427.64   12.28 
  -2   2   0  414.05   12.25 
   2  -2   0  428.67   12.28 
   2   2   0  440.80   12.36 
  -2  -2   0  436.42   12.33 
  -2  -2   0  428.99   12.34 
   2  -2   0  430.05   12.27 
  -2   2   0  426.90   12.26 
  -2   2   0  437.28   12.39 
  -2  -2   0  436.38   12.32 
   2  -2   0  427.29   12.33 
  -2   2   0  446.81   12.35 
   2   2   0  422.34   12.31 
  -2  -2   0  431.49   12.37 
  -2   2   0  438.82   12.17 
   2  -2   0  430.97   12.29 
   2   2   0  436.80   12.33 
  -2  -2   0  438.94   12.32 
   2   2   0  449.74   12.30 
   2   2   0  433.03   12.36 
   2  -2   0  458.74   12.41 
   2  -2   0  446.97   12.35 
  -2  -2   0  432.42   12.34 
  -3  -2   0  108.75    3.37 
  -3  -2   0  111.12    3.37 
   3   2   0  112.77    3.42 
  -3  -2   0  110.23    3.37 
   3  -2   0  108.89    3.32 
  -3   2   0  112.56    3.46 
   3  -2   0  114.10    3.34 
   3  -2   0  111.70    3.46 
   3   2   0  111.22    3.22 
   3   2   0  115.71    3.27 
  -3   2   0  110.51    3.23 
  -3  -2   0  110.08    3.38 
   3  -2   0  112.11    3.32 
  -3   2   0  107.89    3.40 
   3  -2   0  110.04    3.34 
   3  -2   0  110.06    3.40 
   3   2   0  111.82    3.43 
  -3  -2   0  111.07    3.42 
   3  -2   0  112.81    3.31 
   3  -2   0  110.67    3.40 
   3   2   0  110.80    3.39 
   3   2   0  111.83    3.37 
  -3   2   0  109.65    3.30 
   3   2   0  111.69    3.41 
  -3   2   0  111.49    3.16 
  -3   2   0  109.64    3.31 
  -3  -2   0  109.14    3.38 
   3   2   0  108.82    3.35 
   3  -2   0  110.11    3.31 
   3   2   0  112.69    3.38 
  -3  -2   0  108.42    3.38 
  -4   2   0   98.88    2.86 
   4   2   0  100.57    3.10 
   4   2   0   96.35    3.09 
   4  -2   0   97.77    3.21 
   4   2   0   96.87    3.15 
   4  -2   0  101.17    3.12 
   4   2   0   95.69    3.08 
  -4  -2   0   94.97    3.09 
  -4   2   0   95.00    3.04 
  -4   2   0   95.23    3.02 
   4  -2   0   99.92    3.06 
  -4  -2   0   97.82    3.08 
   4  -2   0   97.90    3.04 
   4   2   0  102.02    3.12 
   4  -2   0   99.50    3.09 
   4   2   0   97.44    3.15 
  -4  -2   0   98.27    3.13 
  -4  -2   0  100.74    3.17 
  -4   2   0   97.83    2.86 
   4   2   0   99.93    2.91 
  -4  -2   0   96.46    3.09 
   4   2   0  100.05    3.17 
  -4   2   0  101.44    3.21 
   4  -2   0   97.38    3.13 
   4  -2   0   97.14    3.03 
  -4   2   0   97.47    3.15 
  -4  -2   0   98.69    3.11 
   4   2   0  100.15    2.91 
  -4  -2   0   94.77    3.10 
   4  -2   0   98.77    3.02 
   5   2   0  155.84    4.87 
   5  -2   0  159.03    4.78 
  -5  -2   0  158.96    4.83 
  -5  -2   0  151.92    4.79 
   5   2   0  158.40    4.49 
   5  -2   0  152.67    4.70 
  -5  -2   0  151.23    4.77 
  -5   2   0  154.41    4.42 
   5  -2   0  152.34    4.69 
  -5   2   0  157.63    4.92 
   5  -2   0  151.15    4.77 
  -5  -2   0  155.99    4.85 
  -5  -2   0  157.65    4.76 
  -5  -2   0  158.09    4.84 
   5   2   0  155.98    4.77 
   5  -2   0  159.28    4.75 
  -5   2   0  153.82    4.51 
  -5  -2   0  154.12    4.79 
   5   2   0  153.49    4.85 
   5   2   0  159.74    4.81 
  -5   2   0  151.00    4.69 
  -5   2   0  153.40    4.85 
   5  -2   0  149.65    4.89 
   5   2   0  159.08    4.78 
   5   2   0  155.94    4.77 
   5   2   0  157.11    4.56 
   5  -2   0  156.25    4.84 
   5  -2   0  164.86    4.75 
  -5   2   0  153.61    4.74 
   5   2   0  153.96    4.85 
  -6  -2   0   10.55    0.72 
  -6   2   0   10.13    0.49 
  -6   2   0   10.37    0.66 
   6  -2   0    9.62    0.60 
  -6  -2   0   10.11    0.64 
  -6   2   0    9.55    0.73 
   6  -2   0    9.78    0.70 
  -6  -2   0    9.93    0.67 
   6  -2   0   11.10    0.69 
   6   2   0    8.74    0.68 
   6  -2   0    8.42    0.71 
   6   2   0   10.15    0.66 
   6   2   0    8.98    0.63 
   6   2   0   10.35    0.52 
   6  -2   0    9.82    0.64 
   6   2   0   11.71    0.76 
  -6   2   0    9.56    0.62 
  -6  -2   0   10.91    0.72 
   6   2   0    9.66    0.71 
  -6  -2   0   10.43    0.68 
   6   2   0   10.33    0.40 
   6  -2   0   10.57    0.64 
   6   2   0    9.51    0.65 
   6  -2   0    9.76    0.62 
  -6  -2   0    9.79    0.70 
  -6   2   0    9.04    0.68 
   6  -2   0   10.35    0.65 
  -6  -2   0    9.91    0.68 
  -7  -2   0    0.18    0.23 
  -7   2   0    0.14    0.19 
   7  -2   0    0.11    0.16 
   7  -2   0    0.42    0.28 
  -7  -2   0    0.22    0.22 
  -7   2   0    0.10    0.21 
   7  -2   0    0.19    0.22 
   7  -2   0    0.14    0.17 
   7   2   0    0.20    0.22 
   7  -2   0    0.13    0.17 
   7   2   0    0.10    0.13 
  -7  -2   0    0.21    0.23 
   7   2   0    0.22    0.25 
  -7  -2   0    0.04    0.17 
  -7   2   0    0.02    0.12 
  -7  -2   0    0.16    0.22 
   7   2   0    0.03    0.20 
   7   2   0   -0.10    0.22 
  -7   2   0    0.03    0.22 
   7   2   0    0.07    0.19 
   7  -2   0   -0.01    0.16 
   8   2   0   -0.06    0.20 
  -8  -2   0    0.15    0.24 
   8  -2   0   -0.16    0.15 
   8  -2   0    0.41    0.25 
   8  -2   0   -0.14    0.16 
   8  -2   0    0.22    0.18 
  -8  -2   0    0.14    0.24 
   8   2   0    0.23    0.26 
   8  -2   0    0.25    0.20 
  -8   2   0    0.04    0.19 
   8  -2   0    0.35    0.29 
  -8   2   0    0.36    0.30 
  -8  -2   0   -0.03    0.22 
   8   2   0    0.03    0.22 
   8   2   0    0.16    0.27 
  -8   2   0    0.49    0.28 
  -8   2   0    0.17    0.13 
   8   2   0    0.09    0.19 
  -8  -2   0    0.04    0.21 
  -8  -2   0    0.22    0.19 
   9  -2   0   36.24    1.62 
  -9  -2   0   38.33    1.66 
   9  -2   0   38.51    1.79 
   9  -2   0   38.16    1.65 
  -9  -2   0   38.73    1.79 
   9  -2   0   35.79    1.80 
   9   2   0   38.01    1.71 
  -9   2   0   35.54    1.87 
  -9  -2   0   36.67    1.83 
   9   2   0   37.41    1.71 
  -9  -2   0   35.59    1.76 
  -9   2   0   37.15    1.87 
  -9   2   0   38.49    1.71 
   9   2   0   38.08    1.88 
   9  -2   0   37.56    1.91 
   9   2   0   38.93    1.87 
   9  -2   0   36.57    1.65 
  -9  -2   0   37.74    1.85 
   9   2   0   33.97    1.79 
  10   2   0    5.04    0.80 
 -10  -2   0    7.04    0.94 
  10   2   0    5.23    0.80 
  10   2   0    4.74    0.69 
 -10  -2   0    5.87    0.83 
  10  -2   0    5.44    0.69 
  10   2   0    6.43    0.81 
 -10  -2   0    5.11    0.80 
 -10  -2   0    5.86    0.71 
 -10   2   0    6.71    0.93 
 -10  -2   0    5.40    0.79 
 -10   2   0    5.40    0.87 
  10  -2   0    5.14    0.67 
  10  -2   0    7.15    0.88 
  10  -2   0    4.73    0.78 
  10  -2   0    5.15    0.69 
  10   2   0    5.23    0.83 
 -10   2   0    5.12    0.75 
  10  -2   0    5.84    0.91 
  11  -2   0    9.63    0.94 
  11   2   0    7.55    1.06 
 -11   2   0    8.06    1.09 
  11  -2   0    8.98    1.11 
  11  -2   0    8.25    1.13 
 -11   2   0   10.23    1.09 
  11  -2   0    8.96    0.91 
  11  -2   0    8.00    0.99 
  11   2   0    7.08    1.00 
 -11  -2   0   10.09    1.15 
  11   2   0    7.85    1.07 
  11   2   0    9.20    0.99 
  11  -2   0    8.31    0.91 
 -11  -2   0    8.92    1.13 
 -11  -2   0    8.16    1.02 
 -11   2   0    8.55    1.09 
 -11  -2   0    8.10    1.07 
  11   2   0    8.97    0.96 
  12  -2   0    0.17    0.34 
 -12   2   0    1.09    0.48 
  12  -2   0    0.91    0.35 
 -12  -2   0    0.83    0.42 
  12  -2   0    1.01    0.53 
  12   2   0    0.56    0.39 
 -12  -2   0    1.05    0.53 
  12  -2   0    0.90    0.37 
 -12   2   0    0.86    0.48 
  12  -2   0    1.18    0.46 
  12   2   0    0.52    0.41 
 -12  -2   0    1.28    0.47 
  12  -2   0    1.15    0.51 
  12   2   0    1.48    0.51 
 -12  -2   0    1.11    0.52 
  12   2   0    0.75    0.42 
  12   2   0    0.42    0.35 
 -12   2   0    0.53    0.44 
 -12   2   0    0.74    0.45 
  13   2   0    8.04    1.16 
  13   2   0   10.76    1.22 
  13  -2   0   10.25    1.28 
  13  -2   0    9.83    1.39 
  13   2   0   10.40    1.36 
  13  -2   0   12.38    1.24 
  13  -2   0    9.79    1.06 
 -13  -2   0   15.28    1.60 
 -13   2   0   11.30    1.40 
  13   2   0   10.04    1.14 
 -13  -2   0   12.27    1.46 
 -13  -2   0   12.30    1.41 
 -13  -2   0   12.39    1.43 
 -13   2   0   10.02    1.24 
 -13   2   0   11.10    1.37 
  13   2   0   10.39    1.40 
  13  -2   0   10.68    1.29 
 -13   2   0   11.00    1.43 
 -14  -2   0    1.37    0.59 
 -14   2   0    1.49    0.61 
 -14  -2   0    1.06    0.53 
 -14   2   0    1.89    0.68 
  14   2   0    1.53    0.58 
  14  -2   0    1.18    0.55 
  14  -2   0    1.71    0.57 
  14   2   0    1.77    0.56 
 -14   2   0    1.27    0.54 
  14   2   0    1.24    0.64 
 -14  -2   0    1.05    0.63 
  14  -2   0    1.66    0.71 
 -14  -2   0    1.45    0.62 
  14   2   0    1.98    0.67 
 -14   2   0    2.79    0.81 
  14  -2   0    1.54    0.47 
  14  -2   0    0.79    0.46 
   0   3   0    0.13    0.13 
   0   3   0   -0.03    0.05 
   0  -3   0    0.04    0.09 
   0   3   0    0.21    0.13 
   0   3   0   -0.08    0.08 
   0   3   0    0.00    0.08 
   0   3   0   -0.03    0.08 
   0  -3   0   -0.07    0.09 
   0  -3   0    0.01    0.09 
   0  -3   0   -0.04    0.10 
   0   3   0    0.02    0.10 
   0  -3   0    0.01    0.08 
   0  -3   0   -0.01    0.08 
   0  -3   0   -0.10    0.09 
   1  -3   0    4.66    0.31 
  -1  -3   0    4.56    0.27 
   1   3   0    4.80    0.23 
  -1  -3   0    4.91    0.31 
  -1  -3   0    4.54    0.32 
   1  -3   0    4.34    0.28 
   1   3   0    4.51    0.30 
  -1   3   0    4.90    0.29 
   1  -3   0    4.71    0.23 
  -1  -3   0    5.03    0.30 
  -1   3   0    5.03    0.33 
  -1   3   0    4.83    0.27 
  -1   3   0    5.17    0.29 
   1  -3   0    4.44    0.26 
  -1   3   0    5.00    0.29 
   1   3   0    4.48    0.29 
   1  -3   0    4.56    0.25 
   1  -3   0    4.35    0.32 
   1  -3   0    4.50    0.28 
   1   3   0    4.98    0.33 
   1   3   0    5.13    0.29 
   1  -3   0    4.61    0.34 
  -1  -3   0    4.40    0.31 
  -1   3   0    4.23    0.32 
   1   3   0    4.55    0.32 
  -1   3   0    4.75    0.27 
   1  -3   0    4.60    0.31 
  -1  -3   0    4.92    0.31 
  -1  -3   0    4.88    0.32 
   1   3   0    4.82    0.30 
   1  -3   0    4.64    0.27 
  -1   3   0    4.39    0.26 
   2  -3   0   73.73    2.43 
   2  -3   0   77.91    2.32 
  -2  -3   0   72.97    2.37 
   2  -3   0   76.94    2.45 
   2   3   0   77.37    2.40 
   2   3   0   72.04    2.36 
  -2   3   0   77.80    2.44 
   2  -3   0   74.58    2.38 
   2   3   0   75.95    2.38 
  -2   3   0   75.74    2.30 
   2  -3   0   79.74    2.32 
   2   3   0   75.83    2.40 
  -2  -3   0   77.47    2.27 
  -2   3   0   73.34    2.37 
   2  -3   0   79.38    2.18 
   2  -3   0   79.16    2.34 
   2  -3   0   76.61    2.38 
   2  -3   0   79.58    2.32 
  -2  -3   0   76.02    2.36 
  -2  -3   0   76.23    2.41 
   2   3   0   77.76    2.31 
  -2  -3   0   74.92    2.37 
   2   3   0   77.66    2.38 
  -2  -3   0   77.09    2.43 
   2  -3   0   77.09    2.26 
   2   3   0   73.63    2.38 
   2  -3   0   75.32    2.32 
  -2   3   0   78.28    2.37 
  -2   3   0   74.60    2.30 
   3  -3   0   52.15    1.88 
   3  -3   0   52.57    1.80 
  -3   3   0   54.07    1.72 
   3  -3   0   56.84    1.76 
   3   3   0   53.36    1.63 
   3  -3   0   53.10    1.85 
  -3  -3   0   51.72    1.79 
   3   3   0   52.60    1.75 
  -3   3   0   55.84    1.90 
   3  -3   0   56.86    1.74 
   3   3   0   53.59    1.74 
  -3  -3   0   53.08    1.76 
  -3   3   0   50.24    1.80 
  -3  -3   0   54.38    1.82 
   3   3   0   53.89    1.83 
   3   3   0   52.09    1.79 
   3   3   0   54.57    1.80 
  -3   3   0   50.89    1.71 
   3  -3   0   52.22    1.72 
   3   3   0   54.78    1.83 
  -3   3   0   52.90    1.71 
  -3  -3   0   52.08    1.78 
   3  -3   0   53.47    1.71 
   3  -3   0   52.85    1.73 
  -3  -3   0   53.82    1.86 
  -3  -3   0   50.57    1.80 
  -3  -3   0   52.92    1.78 
  -4  -3   0   63.18    2.17 
   4  -3   0   62.26    2.08 
   4   3   0   64.08    1.96 
  -4  -3   0   66.99    2.26 
   4  -3   0   67.52    2.13 
   4   3   0   66.70    2.21 
   4  -3   0   65.55    2.23 
   4  -3   0   67.08    2.11 
  -4   3   0   60.77    2.20 
  -4   3   0   63.11    2.08 
  -4   3   0   63.03    2.27 
   4   3   0   64.69    2.17 
   4  -3   0   64.36    2.19 
   4   3   0   62.66    2.04 
  -4  -3   0   63.23    2.15 
  -4   3   0   62.19    2.00 
  -4   3   0   65.28    1.86 
  -4  -3   0   64.02    2.19 
   4   3   0   63.39    2.23 
   4   3   0   65.81    2.15 
   4  -3   0   65.19    2.30 
  -4  -3   0   65.22    2.20 
  -4  -3   0   64.28    2.15 
   4  -3   0   65.19    2.10 
   4   3   0   62.73    2.21 
  -4  -3   0   61.71    2.17 
  -4   3   0   64.52    2.11 
   5   3   0   34.24    1.37 
  -5   3   0   34.36    1.12 
  -5  -3   0   32.37    1.35 
  -5   3   0   34.32    1.42 
   5   3   0   33.02    1.34 
  -5   3   0   33.79    1.04 
   5  -3   0   32.86    1.45 
   5   3   0   33.12    1.16 
   5   3   0   33.04    1.39 
   5   3   0   32.67    1.41 
   5  -3   0   34.89    1.30 
  -5  -3   0   31.34    1.35 
   5  -3   0   34.62    1.31 
  -5   3   0   30.18    1.27 
   5   3   0   31.23    1.11 
   5  -3   0   33.58    1.39 
   5  -3   0   33.60    1.27 
   5   3   0   33.09    1.34 
   5   3   0   33.62    1.34 
  -5  -3   0   31.84    1.33 
   5   3   0   32.69    1.40 
  -5   3   0   32.14    1.44 
   5  -3   0   32.78    1.37 
  -5  -3   0   32.47    1.35 
   5  -3   0   32.79    1.30 
  -5  -3   0   31.54    1.34 
  -5   3   0   33.03    1.27 
   5  -3   0   33.68    1.28 
  -5  -3   0   32.89    1.42 
  -5  -3   0   30.67    1.34 
   6  -3   0  103.03    3.53 
   6   3   0  104.23    3.57 
   6   3   0  105.46    3.50 
   6   3   0  109.86    3.19 
   6   3   0  107.11    3.60 
   6  -3   0  106.58    3.40 
  -6   3   0  102.80    3.10 
  -6   3   0  106.53    3.12 
   6  -3   0  102.05    3.37 
   6   3   0  108.46    3.59 
   6   3   0  110.15    3.53 
   6  -3   0  105.79    3.51 
   6   3   0  104.99    3.48 
  -6   3   0  104.19    3.64 
   6   3   0  103.15    3.47 
  -6  -3   0  108.07    3.55 
  -6  -3   0  102.73    3.49 
  -6   3   0  102.79    3.57 
   6  -3   0  104.59    3.37 
  -6  -3   0  105.18    3.51 
  -6  -3   0   97.71    3.48 
   6  -3   0  105.58    3.46 
   6  -3   0  111.42    3.43 
   6  -3   0  106.22    3.65 
  -6  -3   0  105.36    3.53 
  -6   3   0  107.60    3.46 
   6  -3   0  114.36    3.46 
  -6   3   0   98.06    3.37 
  -6  -3   0  107.13    3.49 
  -6  -3   0  108.03    3.60 
   6   3   0  107.30    3.19 
   7  -3   0   47.50    2.09 
  -7  -3   0   50.47    2.01 
   7   3   0   51.62    1.96 
   7   3   0   47.62    1.93 
   7  -3   0   48.09    1.93 
   7  -3   0   49.97    1.84 
  -7  -3   0   51.01    2.02 
   7  -3   0   46.80    1.98 
   7   3   0   49.34    1.64 
   7  -3   0   48.34    1.82 
   7   3   0   47.08    2.02 
   7   3   0   46.04    2.00 
   7  -3   0   48.34    1.92 
  -7  -3   0   50.67    1.99 
  -7   3   0   46.86    2.02 
  -7   3   0   49.83    1.88 
  -7   3   0   48.28    2.09 
  -7  -3   0   47.31    1.95 
   7   3   0   46.55    2.01 
  -7   3   0   47.07    1.57 
  -7  -3   0   48.42    1.92 
   7  -3   0   48.33    1.85 
   8  -3   0   48.12    1.86 
   8   3   0   48.06    2.10 
   8   3   0   44.01    2.05 
   8  -3   0   46.56    1.85 
   8  -3   0   47.18    1.97 
   8  -3   0   46.25    2.04 
  -8   3   0   47.56    2.10 
  -8   3   0   44.14    2.10 
   8   3   0   46.47    2.08 
   8  -3   0   45.41    1.88 
  -8  -3   0   47.64    2.05 
  -8   3   0   46.55    1.91 
   8  -3   0   50.13    1.98 
   8   3   0   49.36    1.98 
  -8  -3   0   47.44    1.95 
   8  -3   0   44.76    2.11 
  -8  -3   0   48.93    2.03 
   8   3   0   48.58    1.98 
  -8  -3   0   48.48    2.06 
  -8  -3   0   49.49    2.04 
  -9  -3   0   26.11    1.45 
   9  -3   0   25.12    1.27 
  -9  -3   0   27.82    1.50 
   9   3   0   26.20    1.50 
   9  -3   0   27.50    1.50 
   9   3   0   25.68    1.49 
  -9  -3   0   26.22    1.34 
  -9  -3   0   26.30    1.43 
   9   3   0   26.88    1.39 
   9   3   0   26.13    1.50 
   9  -3   0   25.80    1.54 
  -9   3   0   23.73    1.31 
   9  -3   0   26.09    1.28 
  -9   3   0   26.00    1.50 
  -9   3   0   23.35    1.48 
   9   3   0   24.86    1.35 
   9  -3   0   25.67    1.31 
   9  -3   0   25.12    1.32 
   9  -3   0   23.33    1.33 
  -9  -3   0   24.65    1.40 
 -10  -3   0   54.44    2.42 
  10   3   0   53.34    2.32 
  10  -3   0   54.74    2.46 
  10  -3   0   55.44    2.26 
 -10   3   0   56.01    2.54 
 -10  -3   0   55.44    2.41 
 -10  -3   0   57.34    2.31 
  10   3   0   54.31    2.50 
  10  -3   0   54.56    2.57 
  10   3   0   56.11    2.53 
 -10  -3   0   54.97    2.47 
  10   3   0   53.49    2.32 
  10  -3   0   52.51    2.34 
 -10   3   0   53.72    2.57 
  10  -3   0   55.27    2.23 
 -10   3   0   55.70    2.33 
  10   3   0   55.86    2.53 
 -10  -3   0   55.78    2.48 
  11  -3   0   -0.07    0.33 
 -11  -3   0    0.33    0.31 
 -11  -3   0    0.44    0.39 
  11  -3   0   -0.21    0.26 
  11   3   0    0.53    0.33 
 -11  -3   0    0.40    0.33 
 -11   3   0    0.03    0.30 
  11   3   0    0.18    0.34 
 -11   3   0    0.31    0.38 
  11   3   0   -0.08    0.26 
 -11   3   0   -0.01    0.29 
  11  -3   0    0.21    0.24 
  11   3   0   -0.04    0.32 
  11  -3   0    0.14    0.28 
  11  -3   0   -0.22    0.24 
 -11  -3   0    0.25    0.32 
 -11  -3   0    0.21    0.36 
 -12  -3   0   11.93    1.39 
 -12  -3   0   12.61    1.35 
  12  -3   0   12.34    1.18 
  12  -3   0    9.84    1.21 
  12  -3   0   11.13    1.41 
  12  -3   0   11.22    1.24 
 -12   3   0   10.86    1.34 
  12  -3   0   11.21    0.92 
 -12  -3   0   11.76    1.32 
  12   3   0   13.39    1.27 
  12   3   0   12.50    1.23 
  12   3   0   16.07    1.62 
 -12  -3   0   12.61    1.36 
 -12   3   0   12.87    1.25 
 -12   3   0   12.32    1.42 
  12   3   0   12.28    1.40 
 -13  -3   0    1.70    0.65 
  13   3   0    1.58    0.52 
  13   3   0    1.26    0.48 
  13  -3   0    1.68    0.58 
  13   3   0    1.58    0.67 
 -13   3   0    2.54    0.73 
  13  -3   0    1.20    0.43 
  13  -3   0    2.27    0.61 
 -13   3   0    0.75    0.49 
 -13  -3   0    1.93    0.64 
  13  -3   0    1.72    0.68 
 -13  -3   0    0.81    0.52 
  13   3   0    1.84    0.60 
  13  -3   0    1.88    0.55 
 -13   3   0    2.75    0.70 
 -13   3   0    0.91    0.53 
 -13  -3   0    1.33    0.56 
  14   3   0    1.00    0.49 
 -14   3   0    2.62    0.77 
  14  -3   0    2.85    0.63 
 -14  -3   0    2.73    0.73 
  14   3   0    1.50    0.57 
  14  -3   0    3.36    0.75 
 -14  -3   0    1.75    0.65 
 -14  -3   0    2.56    0.76 
  14  -3   0    1.29    0.59 
 -14   3   0    1.07    0.61 
  14   3   0    2.12    0.64 
 -14  -3   0    3.04    0.81 
  14   3   0    1.84    0.60 
  14  -3   0    2.75    0.59 
  14  -3   0    3.84    0.89 
 -14   3   0    2.06    0.66 
 -14   3   0    2.04    0.70 
   0   4   0  513.35   16.20 
   0   4   0  582.28   16.17 
   0   4   0  563.23   16.39 
   0   4   0  554.14   16.07 
   0  -4   0  595.15   16.14 
   0  -4   0  587.84   16.19 
   0  -4   0  582.12   16.14 
   0   4   0  580.92   16.26 
   0   4   0  575.75   16.36 
   0  -4   0  599.06   16.22 
   0  -4   0  566.62   16.19 
   0  -4   0  565.59   16.15 
   0  -4   0  569.88   16.14 
   0   4   0  592.93   16.15 
  -1  -4   0  167.59    4.91 
   1  -4   0  170.50    4.87 
  -1   4   0  172.46    4.90 
  -1  -4   0  165.15    4.94 
   1  -4   0  169.41    4.87 
   1   4   0  173.32    4.93 
  -1  -4   0  166.71    4.90 
   1   4   0  169.79    4.92 
  -1   4   0  167.69    4.83 
  -1  -4   0  171.81    4.92 
   1  -4   0  172.00    5.01 
   1  -4   0  170.72    4.82 
   1  -4   0  167.69    4.89 
  -1  -4   0  158.91    4.88 
   1  -4   0  171.06    4.85 
  -1   4   0  166.27    4.98 
   1  -4   0  164.89    4.91 
   1   4   0  163.61    4.89 
  -1  -4   0  164.13    4.93 
   1  -4   0  160.79    4.94 
   1   4   0  166.15    4.83 
   1   4   0  171.22    4.78 
   1   4   0  160.18    4.98 
   1  -4   0  166.84    4.89 
  -1   4   0  166.85    4.96 
   1   4   0  167.31    4.96 
  -1   4   0  170.96    4.90 
  -1  -4   0  162.54    4.96 
  -1   4   0  166.29    4.87 
   2   4   0  126.41    3.70 
  -2   4   0  119.25    3.65 
  -2   4   0  124.56    3.72 
   2  -4   0  123.79    3.61 
  -2  -4   0  114.77    3.71 
   2   4   0  121.02    3.71 
  -2  -4   0  121.84    3.70 
  -2   4   0  124.43    3.71 
  -2  -4   0  123.41    3.59 
   2  -4   0  120.03    3.62 
   2  -4   0  121.73    3.64 
   2  -4   0  126.43    3.78 
  -2   4   0  117.99    3.74 
   2   4   0  125.44    3.68 
  -2  -4   0  122.96    3.66 
   2   4   0  117.03    3.69 
   2  -4   0  119.96    3.69 
   2   4   0  122.71    3.57 
   2  -4   0  123.24    3.48 
  -2   4   0  118.37    3.60 
   2  -4   0  123.81    3.48 
  -2  -4   0  121.91    3.70 
   2   4   0  120.32    3.68 
   2  -4   0  120.57    3.70 
  -2   4   0  120.59    3.61 
  -2  -4   0  120.93    3.69 
  -2  -4   0  120.57    3.75 
   2  -4   0  123.39    3.79 
  -2   4   0  117.93    3.70 
   2   4   0  121.30    3.73 
   2  -4   0  124.51    3.62 
   3   4   0   11.94    0.62 
   3  -4   0   11.52    0.62 
   3   4   0   11.39    0.55 
  -3  -4   0   11.41    0.60 
   3   4   0   11.57    0.49 
  -3  -4   0   11.75    0.60 
  -3  -4   0   11.58    0.62 
   3  -4   0   11.60    0.50 
  -3   4   0   11.14    0.66 
   3  -4   0   11.80    0.56 
  -3   4   0   10.75    0.60 
   3   4   0   11.52    0.63 
  -3   4   0   11.10    0.54 
   3   4   0   11.78    0.63 
   3  -4   0   12.08    0.56 
   3  -4   0   10.76    0.56 
   3  -4   0   11.75    0.55 
   3   4   0    8.18    0.53 
  -3   4   0   11.37    0.54 
  -3  -4   0   11.24    0.63 
   3  -4   0   11.30    0.61 
  -3  -4   0   11.52    0.48 
   3   4   0   11.38    0.60 
  -3   4   0   11.30    0.58 
   3  -4   0   11.56    0.67 
  -3  -4   0   11.38    0.62 
   3  -4   0   11.26    0.67 
   3   4   0   11.40    0.63 
  -3  -4   0   11.15    0.65 
  -4  -4   0  229.57    6.82 
  -4   4   0  225.61    6.75 
   4   4   0  231.36    6.48 
   4  -4   0  229.81    6.58 
  -4  -4   0  224.34    6.69 
   4  -4   0  235.74    6.62 
   4  -4   0  223.15    6.84 
  -4  -4   0  220.94    6.73 
  -4   4   0  218.38    6.59 
  -4  -4   0  227.45    6.73 
  -4   4   0  223.89    6.62 
   4  -4   0  239.79    6.66 
  -4  -4   0  222.11    6.75 
   4  -4   0  226.46    6.61 
  -4  -4   0  222.90    6.66 
   4   4   0  230.16    6.76 
   4   4   0  225.16    6.63 
   4  -4   0  224.94    6.73 
   4   4   0  221.95    6.76 
  -4   4   0  226.24    6.59 
   4  -4   0  221.25    6.60 
  -4  -4   0  222.78    6.69 
   4  -4   0  220.67    6.79 
   4   4   0  226.18    6.72 
  -4   4   0  225.87    6.84 
   4   4   0  223.88    6.64 
   4   4   0  227.98    6.71 
   4   4   0  224.62    6.77 
  -5   4   0    9.53    0.58 
  -5   4   0   10.85    0.54 
   5  -4   0   11.53    0.64 
   5  -4   0   10.56    0.70 
   5   4   0   10.72    0.57 
   5   4   0   10.44    0.63 
   5  -4   0    7.79    0.53 
   5   4   0    9.62    0.68 
   5  -4   0   10.38    0.60 
  -5  -4   0   10.27    0.64 
  -5  -4   0   10.74    0.73 
  -5   4   0    9.88    0.72 
   5  -4   0   11.41    0.76 
  -5   4   0   10.17    0.61 
  -5  -4   0   10.89    0.66 
   5  -4   0    9.83    0.58 
  -5  -4   0   10.29    0.68 
  -5  -4   0   10.40    0.67 
   5  -4   0    9.97    0.58 
  -5   4   0   10.44    0.69 
   5   4   0   10.58    0.67 
   5   4   0   10.49    0.48 
   5  -4   0   10.07    0.66 
  -5  -4   0   11.24    0.70 
   5   4   0    9.80    0.67 
  -5  -4   0   10.81    0.69 
   5   4   0   10.68    0.67 
   5   4   0   10.55    0.71 
   6  -4   0   26.45    1.25 
   6   4   0   25.53    1.27 
  -6   4   0   25.99    0.98 
  -6  -4   0   25.52    1.23 
   6  -4   0   25.76    1.12 
   6   4   0   26.29    1.20 
   6  -4   0   26.41    1.14 
   6   4   0   25.25    1.27 
   6  -4   0   27.98    1.38 
   6   4   0   26.58    1.04 
   6   4   0   24.66    1.21 
   6  -4   0   22.56    1.10 
   6  -4   0   27.64    1.15 
  -6  -4   0   26.21    1.21 
   6  -4   0   27.31    1.28 
   6   4   0   26.69    0.95 
  -6   4   0   26.18    1.17 
   6   4   0   27.17    1.25 
  -6   4   0   24.61    1.31 
   6  -4   0   26.43    1.16 
  -6  -4   0   25.93    1.22 
  -6  -4   0   28.52    1.35 
  -6   4   0   25.60    1.13 
  -6   4   0   23.79    1.24 
  -6  -4   0   26.41    1.24 
   6   4   0   25.72    1.21 
  -6  -4   0   26.27    1.25 
  -6  -4   0   26.01    1.25 
   7   4   0   15.50    1.01 
   7  -4   0   17.57    1.00 
   7   4   0   16.20    0.95 
  -7   4   0   16.07    0.89 
   7  -4   0   16.42    0.88 
   7  -4   0   15.95    0.86 
   7   4   0   15.59    0.73 
   7   4   0   16.18    0.97 
   7  -4   0   15.06    1.04 
  -7  -4   0   14.62    0.96 
  -7  -4   0   17.72    1.02 
   7  -4   0   16.66    0.99 
  -7  -4   0   16.34    0.95 
  -7   4   0   15.62    1.02 
  -7   4   0   16.67    1.09 
  -7  -4   0   16.07    0.97 
   7  -4   0   16.32    0.90 
  -7  -4   0   14.96    0.94 
   7   4   0   15.70    1.01 
   8  -4   0    3.59    0.59 
  -8   4   0    4.07    0.67 
   8   4   0    2.80    0.54 
  -8  -4   0    3.58    0.60 
   8   4   0    3.60    0.58 
   8   4   0    3.42    0.61 
  -8  -4   0    2.84    0.52 
  -8  -4   0    3.55    0.57 
   8  -4   0    4.01    0.60 
   8  -4   0    3.79    0.52 
   8  -4   0    3.47    0.49 
  -8  -4   0    3.02    0.56 
   8  -4   0    3.16    0.52 
   8  -4   0    4.45    0.73 
  -8   4   0    3.18    0.58 
  -8   4   0    3.12    0.51 
   8   4   0    3.33    0.53 
  -8  -4   0    3.59    0.55 
   9  -4   0   -0.15    0.22 
  -9   4   0    0.32    0.24 
  -9  -4   0    0.15    0.27 
  -9  -4   0   -0.03    0.23 
   9   4   0   -0.06    0.26 
  -9   4   0    0.16    0.30 
   9   4   0    0.03    0.23 
   9  -4   0    0.22    0.22 
   9   4   0    0.45    0.31 
   9  -4   0   -0.15    0.17 
   9  -4   0    0.12    0.28 
  -9   4   0    0.19    0.27 
   9  -4   0    0.02    0.24 
  -9  -4   0    0.29    0.27 
   9   4   0    0.24    0.27 
   9  -4   0   -0.17    0.18 
  -9  -4   0    0.49    0.30 
  -9  -4   0   -0.12    0.24 
  10   4   0   17.91    1.29 
 -10  -4   0   15.80    1.17 
 -10  -4   0   18.55    1.24 
  10   4   0   18.80    1.20 
  10  -4   0   17.18    1.11 
  10  -4   0   16.64    1.31 
 -10  -4   0   16.73    1.11 
 -10  -4   0   17.07    1.17 
 -10   4   0   17.79    1.14 
  10  -4   0   15.37    1.00 
  10  -4   0   17.81    1.14 
  10   4   0   16.51    1.12 
 -10  -4   0   17.12    1.22 
 -10   4   0   18.30    1.33 
  10   4   0   16.04    1.22 
  10  -4   0   14.86    1.14 
 -10   4   0   16.17    1.23 
  10  -4   0   16.73    1.07 
  11   4   0    2.84    0.61 
 -11   4   0    2.77    0.68 
  11  -4   0    3.61    0.71 
  11   4   0    2.00    0.59 
  11  -4   0    4.84    0.94 
 -11  -4   0    2.66    0.57 
 -11  -4   0    4.04    0.79 
 -11   4   0    2.21    0.59 
  11   4   0    2.14    0.53 
 -11   4   0    3.79    0.68 
  11  -4   0    2.17    0.52 
 -11  -4   0    3.02    0.63 
 -11  -4   0    3.22    0.71 
  11   4   0    3.62    0.77 
  11  -4   0    2.69    0.57 
 -11  -4   0    3.02    0.67 
  11  -4   0    3.20    0.54 
  12  -4   0   10.55    1.27 
 -12  -4   0   10.65    1.27 
 -12   4   0    8.45    1.02 
  12   4   0    9.33    1.07 
 -12  -4   0   11.62    1.33 
 -12   4   0    9.30    1.27 
  12   4   0   10.66    1.31 
  12   4   0    8.42    1.03 
  12  -4   0    8.90    0.95 
  12  -4   0    7.83    1.20 
 -12  -4   0   12.02    1.39 
  12   4   0    9.25    1.19 
  12  -4   0    8.84    1.07 
  12  -4   0   10.61    1.10 
 -12  -4   0    8.36    1.13 
 -12   4   0   12.40    1.46 
  13   4   0    3.89    0.75 
  13  -4   0    3.77    0.64 
  13   4   0    3.71    0.74 
 -13  -4   0    4.69    0.90 
  13  -4   0    2.57    0.60 
 -13  -4   0    5.15    0.94 
  13   4   0    4.32    0.91 
  13  -4   0    3.50    0.74 
 -13  -4   0    4.24    0.92 
  13   4   0    4.35    0.89 
 -13  -4   0    4.89    0.91 
 -13   4   0    4.41    0.92 
  13  -4   0    2.67    0.71 
 -13   4   0    3.89    0.90 
 -13   4   0    3.86    0.79 
  13  -4   0    4.14    0.90 
 -14   4   0   12.72    1.42 
  14   4   0   12.03    1.46 
  14  -4   0   10.46    1.39 
 -14  -4   0   14.02    1.54 
  14   4   0   11.66    1.52 
 -14  -4   0   12.51    1.51 
  14  -4   0   12.94    1.27 
  14   4   0    8.19    1.11 
 -14   4   0   12.65    1.58 
 -14   4   0   10.48    1.66 
  14   4   0   11.36    1.32 
  14  -4   0   10.88    1.49 
 -14  -4   0   12.44    1.54 
 -14  -4   0   13.08    1.50 
 -14   4   0   14.75    1.64 
   0   5   0    0.06    0.16 
   0  -5   0   -0.30    0.09 
   0  -5   0    0.01    0.13 
   0  -5   0   -0.04    0.14 
   0   5   0   -0.01    0.15 
   0  -5   0   -0.14    0.14 
   0   5   0   -0.16    0.06 
   0   5   0   -0.15    0.10 
   0  -5   0   -0.13    0.12 
   0   5   0    0.04    0.14 
   0   5   0   -0.05    0.12 
   0   5   0   -0.05    0.10 
   0  -5   0   -0.10    0.11 
   0  -5   0    0.01    0.12 
   1  -5   0   46.35    1.52 
  -1  -5   0   44.51    1.65 
   1  -5   0   50.71    1.62 
   1  -5   0   46.85    1.57 
   1   5   0   45.86    1.62 
   1  -5   0   48.10    1.67 
   1   5   0   46.78    1.71 
  -1   5   0   50.14    1.61 
   1  -5   0   47.27    1.62 
   1   5   0   46.41    1.59 
   1   5   0   46.98    1.67 
  -1  -5   0   46.02    1.60 
   1  -5   0   47.04    1.70 
  -1   5   0   46.07    1.61 
  -1  -5   0   46.58    1.65 
  -1  -5   0   46.38    1.61 
   1   5   0   45.02    1.50 
  -1  -5   0   48.07    1.62 
   1  -5   0   46.58    1.60 
   1  -5   0   50.68    1.56 
  -1   5   0   47.17    1.51 
   1   5   0   45.79    1.62 
   1   5   0   48.31    1.47 
  -1   5   0   46.27    1.57 
  -1   5   0   45.68    1.69 
  -1  -5   0   46.36    1.63 
  -1   5   0   47.20    1.68 
  -1  -5   0   49.38    1.62 
   2   5   0   45.96    1.44 
   2   5   0   43.78    1.60 
   2  -5   0   44.66    1.55 
   2   5   0   43.44    1.59 
  -2  -5   0   45.80    1.56 
   2   5   0   44.59    1.57 
  -2   5   0   43.44    1.51 
  -2   5   0   47.29    1.55 
  -2   5   0   45.47    1.63 
   2  -5   0   45.76    1.62 
   2  -5   0   45.37    1.30 
  -2   5   0   43.59    1.52 
  -2  -5   0   43.90    1.58 
  -2  -5   0   44.47    1.50 
   2  -5   0   43.19    1.52 
   2  -5   0   44.11    1.39 
  -2   5   0   44.23    1.50 
   2   5   0   42.47    1.62 
   2  -5   0   44.24    1.50 
  -2  -5   0   44.13    1.58 
  -2   5   0   44.62    1.63 
   2   5   0   42.91    1.52 
   2   5   0   46.41    1.60 
  -2  -5   0   44.26    1.59 
  -2   5   0   44.39    1.62 
   2  -5   0   43.26    1.66 
   2  -5   0   46.32    1.59 
  -2  -5   0   44.38    1.65 
   2  -5   0   44.72    1.65 
  -2  -5   0   45.25    1.62 
   2  -5   0   42.75    1.50 
  -2   5   0   42.41    1.51 
   3   5   0    0.40    0.17 
  -3   5   0    0.34    0.13 
   3  -5   0    0.29    0.20 
  -3   5   0    0.72    0.20 
  -3  -5   0    0.25    0.11 
   3  -5   0    0.24    0.16 
   3   5   0    0.49    0.21 
  -3  -5   0    0.64    0.22 
   3  -5   0    0.57    0.21 
   3  -5   0    0.47    0.22 
  -3   5   0    0.33    0.18 
   3  -5   0    0.50    0.12 
   3  -5   0    0.46    0.15 
   3   5   0    0.36    0.18 
  -3   5   0    0.51    0.16 
  -3  -5   0    0.56    0.19 
   3  -5   0    0.46    0.16 
  -3  -5   0    0.53    0.20 
  -3   5   0    0.39    0.17 
  -3  -5   0    0.43    0.19 
  -3  -5   0    0.47    0.19 
  -3   5   0    0.67    0.22 
  -3  -5   0    0.32    0.19 
   3  -5   0    0.31    0.14 
   3  -5   0    0.68    0.20 
   3   5   0    0.75    0.22 
   3  -5   0    0.64    0.17 
   3   5   0    0.31    0.14 
   3  -5   0    0.49    0.08 
   3   5   0    0.85    0.24 
  -4  -5   0   24.84    0.94 
  -4  -5   0   26.28    1.15 
  -4  -5   0   27.09    1.20 
   4  -5   0   26.80    1.05 
   4   5   0   28.33    1.19 
   4   5   0   26.96    1.16 
   4   5   0   25.40    1.17 
   4   5   0   25.96    0.96 
  -4   5   0   27.61    1.08 
  -4   5   0   26.00    1.05 
   4  -5   0   27.25    1.09 
   4  -5   0   24.79    1.20 
   4  -5   0   27.55    1.26 
   4  -5   0   27.32    1.17 
  -4  -5   0   24.83    1.14 
   4  -5   0   27.59    1.07 
   4   5   0   25.17    1.18 
  -4  -5   0   26.03    1.08 
   4  -5   0   27.87    1.19 
   4  -5   0   27.40    1.08 
  -4  -5   0   25.29    1.21 
  -4  -5   0   26.80    1.13 
  -4   5   0   25.09    1.08 
  -4   5   0   26.52    1.16 
  -4   5   0   26.12    1.24 
  -4  -5   0   26.76    1.17 
   4  -5   0   26.38    0.99 
   4   5   0   26.39    1.17 
   4   5   0   27.54    1.08 
   5   5   0  136.25    4.33 
   5   5   0  137.01    4.17 
  -5  -5   0  134.28    4.30 
   5   5   0  132.38    4.33 
   5   5   0  130.02    4.27 
   5   5   0  135.16    4.33 
   5  -5   0  141.16    4.20 
   5  -5   0  134.44    4.43 
  -5  -5   0  136.79    4.40 
   5   5   0  134.76    4.19 
  -5  -5   0  132.38    4.20 
   5   5   0  131.87    4.25 
   5  -5   0  135.06    4.15 
   5   5   0  132.22    3.96 
  -5   5   0  131.35    4.30 
  -5  -5   0  136.50    4.26 
   5  -5   0  132.78    4.37 
   5  -5   0  141.27    4.15 
  -5   5   0  130.06    4.11 
  -5   5   0  127.97    4.12 
   5  -5   0  134.83    4.10 
  -5   5   0  132.29    4.17 
  -5  -5   0  136.65    4.34 
  -5  -5   0  134.67    4.30 
  -5   5   0  132.69    4.42 
   5  -5   0  131.73    4.29 
  -5  -5   0  132.82    4.25 
   5  -5   0  132.50    4.13 
  -6  -5   0   34.94    1.55 
   6   5   0   33.69    1.57 
  -6   5   0   35.72    1.67 
   6   5   0   34.02    1.46 
  -6  -5   0   34.21    1.48 
  -6   5   0   34.46    1.57 
   6   5   0   32.83    1.54 
   6  -5   0   35.18    1.45 
   6   5   0   37.48    1.55 
   6  -5   0   34.11    1.57 
  -6  -5   0   36.94    1.54 
   6  -5   0   35.40    1.44 
  -6  -5   0   35.40    1.56 
  -6   5   0   31.87    1.38 
  -6  -5   0   35.77    1.55 
  -6   5   0   35.93    1.32 
   6  -5   0   33.83    1.40 
   6   5   0   35.71    1.54 
   6   5   0   36.17    1.37 
   6   5   0   34.64    1.58 
  -6  -5   0   34.73    1.50 
   6  -5   0   32.99    1.52 
   6  -5   0   33.41    1.38 
   6  -5   0   38.37    1.71 
   6   5   0   33.57    1.20 
  -6  -5   0   34.59    1.61 
   6  -5   0   36.16    1.41 
   7   5   0   70.91    2.34 
   7  -5   0   69.33    2.64 
  -7  -5   0   69.23    2.65 
   7   5   0   69.08    2.70 
   7   5   0   70.93    2.62 
  -7  -5   0   68.97    2.59 
  -7   5   0   71.19    2.70 
   7  -5   0   70.34    2.80 
   7   5   0   68.16    2.69 
   7  -5   0   70.25    2.67 
  -7  -5   0   68.27    2.59 
  -7  -5   0   71.67    2.63 
  -7   5   0   72.06    2.81 
   7   5   0   67.95    2.58 
   7  -5   0   69.80    2.45 
   7  -5   0   70.42    2.48 
  -7  -5   0   67.59    2.62 
  -7   5   0   67.56    2.47 
   7   5   0   67.52    2.55 
   8  -5   0    6.44    0.80 
   8  -5   0    7.91    0.78 
   8  -5   0    6.54    0.69 
  -8  -5   0    6.38    0.78 
  -8  -5   0    6.48    0.78 
   8  -5   0    8.01    0.85 
   8  -5   0    6.91    0.68 
   8   5   0    7.60    0.82 
   8   5   0    7.58    0.91 
  -8   5   0    7.86    0.98 
   8  -5   0    6.95    0.93 
  -8  -5   0    8.33    0.88 
  -8  -5   0    7.42    0.86 
   8   5   0    8.02    0.88 
  -8   5   0    8.03    0.79 
  -8  -5   0    5.29    0.69 
   8   5   0    6.88    0.83 
  -8   5   0    6.52    0.82 
   9   5   0   24.43    1.41 
  -9  -5   0   26.91    1.48 
  -9   5   0   25.47    1.35 
  -9  -5   0   24.95    1.41 
   9  -5   0   25.69    1.28 
  -9   5   0   25.95    1.59 
   9  -5   0   27.60    1.47 
  -9   5   0   25.67    1.52 
  -9  -5   0   24.95    1.41 
   9  -5   0   25.44    1.31 
   9  -5   0   27.29    1.38 
  -9  -5   0   26.86    1.51 
   9   5   0   27.40    1.55 
  -9  -5   0   25.46    1.44 
   9  -5   0   25.57    1.59 
   9   5   0   26.69    1.54 
   9   5   0   27.89    1.45 
   9  -5   0   27.87    1.52 
 -10  -5   0    2.79    0.59 
  10  -5   0    2.94    0.55 
 -10   5   0    2.90    0.68 
  10   5   0    3.20    0.61 
 -10   5   0    2.97    0.66 
  10  -5   0    2.88    0.63 
  10  -5   0    3.20    0.60 
  10   5   0    3.90    0.75 
  10   5   0    3.36    0.69 
 -10  -5   0    3.07    0.63 
 -10  -5   0    3.98    0.71 
 -10  -5   0    3.35    0.66 
 -10  -5   0    4.12    0.75 
  10  -5   0    2.75    0.51 
  10  -5   0    3.81    0.79 
  10   5   0    2.41    0.56 
  10  -5   0    2.32    0.47 
 -10   5   0    3.39    0.62 
  11  -5   0   19.27    1.50 
 -11  -5   0   22.19    1.38 
 -11  -5   0   20.99    1.42 
  11   5   0   18.84    1.43 
 -11  -5   0   20.28    1.38 
  11  -5   0   18.42    1.15 
 -11   5   0   17.32    1.71 
 -11   5   0   18.86    1.27 
  11  -5   0   20.38    1.40 
 -11  -5   0   18.87    1.34 
  11   5   0   19.94    1.35 
  11  -5   0   19.91    1.28 
  11   5   0   19.69    1.46 
  11   5   0   20.54    1.35 
 -11  -5   0   22.64    1.50 
  11  -5   0   20.02    1.24 
 -11   5   0   20.60    1.50 
  12   5   0    0.11    0.34 
  12  -5   0    0.38    0.41 
 -12  -5   0   -0.14    0.40 
  12   5   0    0.42    0.44 
 -12  -5   0    0.24    0.37 
  12  -5   0    0.02    0.29 
  12  -5   0    0.14    0.37 
 -12  -5   0    0.39    0.40 
 -12   5   0   -0.19    0.29 
 -12  -5   0    0.02    0.30 
 -12   5   0    0.30    0.46 
  12   5   0    0.37    0.44 
  12  -5   0    0.60    0.33 
  12   5   0    0.49    0.40 
 -12   5   0    0.19    0.37 
  13  -5   0    7.45    1.26 
 -13   5   0    4.81    0.99 
  13  -5   0    5.51    0.83 
 -13  -5   0    6.52    1.07 
  13  -5   0    4.11    0.67 
  13   5   0    8.67    1.32 
  13   5   0    5.98    0.95 
  13   5   0    6.15    1.06 
 -13  -5   0    6.59    1.03 
 -13  -5   0    7.58    1.18 
  13  -5   0    5.79    1.01 
 -13   5   0    6.91    1.23 
  13   5   0    5.67    0.92 
 -13   5   0    6.71    0.99 
 -13  -5   0    5.74    0.94 
 -14  -5   0    0.40    0.49 
 -14   5   0    0.35    0.45 
 -14  -5   0    1.19    0.50 
 -14   5   0    0.06    0.28 
  14   5   0   -0.21    0.39 
  14   5   0    0.22    0.34 
  14  -5   0    0.43    0.38 
   0  -6   0   37.95    1.47 
   0   6   0   36.79    1.17 
   0  -6   0   38.81    1.38 
   0   6   0   38.68    1.53 
   0  -6   0   36.75    1.42 
   0  -6   0   39.56    1.41 
   0  -6   0   38.51    1.38 
   0   6   0   37.95    1.38 
   0  -6   0   38.51    1.44 
   0   6   0   38.90    1.43 
   0   6   0   37.52    1.49 
   0   6   0   41.67    1.43 
   0  -6   0   37.45    1.38 
   0   6   0   39.10    1.30 
   1   6   0  188.12    5.88 
   1  -6   0  194.51    5.83 
   1  -6   0  189.98    5.65 
  -1  -6   0  192.25    5.78 
   1  -6   0  193.64    5.70 
   1  -6   0  187.93    5.86 
  -1   6   0  197.22    5.71 
  -1   6   0  187.27    5.87 
   1  -6   0  189.48    5.80 
  -1   6   0  195.24    5.74 
  -1   6   0  193.07    5.76 
   1  -6   0  188.84    5.74 
  -1  -6   0  191.14    5.82 
  -1  -6   0  199.17    5.76 
  -1  -6   0  201.30    5.76 
   1  -6   0  202.30    5.68 
   1   6   0  195.37    5.78 
  -1   6   0  195.54    5.85 
   1   6   0  189.70    5.59 
   1  -6   0  190.73    5.74 
  -1  -6   0  195.58    5.81 
  -1  -6   0  196.47    5.75 
   1   6   0  190.64    5.73 
   1   6   0  195.12    5.56 
   1   6   0  191.74    5.84 
   1   6   0  197.69    5.78 
  -1  -6   0  193.38    5.76 
  -1   6   0  194.40    5.62 
  -2   6   0    6.25    0.43 
   2   6   0    6.00    0.45 
   2  -6   0    6.85    0.47 
   2  -6   0    6.25    0.48 
   2   6   0    6.21    0.50 
  -2  -6   0    6.28    0.48 
  -2  -6   0    6.87    0.50 
  -2  -6   0    6.50    0.45 
   2  -6   0    6.82    0.45 
   2   6   0    6.90    0.36 
   2   6   0    6.20    0.41 
  -2  -6   0    6.25    0.42 
  -2   6   0    6.05    0.40 
  -2   6   0    6.03    0.50 
   2   6   0    6.66    0.49 
   2  -6   0    5.78    0.40 
  -2  -6   0    6.77    0.49 
  -2   6   0    6.16    0.42 
   2  -6   0    6.41    0.50 
   2   6   0    6.58    0.51 
  -2  -6   0    6.53    0.47 
  -2  -6   0    7.76    0.55 
   2   6   0    5.69    0.45 
   2  -6   0    6.19    0.35 
   2  -6   0    6.48    0.43 
   2  -6   0    6.37    0.63 
  -2   6   0    7.08    0.52 
  -2   6   0    6.16    0.44 
   2  -6   0    6.00    0.43 
   3  -6   0   18.75    0.82 
  -3  -6   0   18.09    0.96 
  -3   6   0   18.63    0.86 
  -3   6   0   18.11    0.92 
   3  -6   0   18.80    0.84 
  -3  -6   0   19.38    0.88 
   3  -6   0   19.04    0.86 
   3  -6   0   18.51    0.99 
  -3  -6   0   19.31    0.96 
   3  -6   0   18.01    0.82 
   3  -6   0   18.81    0.93 
  -3   6   0   18.92    0.85 
   3   6   0   18.11    0.87 
  -3  -6   0   17.88    0.78 
  -3  -6   0   18.59    0.91 
  -3   6   0   18.27    0.82 
   3  -6   0   19.28    0.91 
   3   6   0   18.87    0.94 
   3   6   0   18.50    0.89 
   3   6   0   18.16    0.92 
  -3   6   0   17.56    0.94 
   3   6   0   19.23    0.93 
   3  -6   0   19.06    0.65 
   3   6   0   19.16    0.79 
   3  -6   0   19.38    0.99 
   3  -6   0   19.55    0.67 
  -3  -6   0   19.89    0.93 
  -3  -6   0   20.34    0.94 
   3   6   0   16.98    0.91 
  -3   6   0   18.13    0.93 
  -4  -6   0   10.50    0.73 
  -4   6   0   10.60    0.61 
  -4   6   0   11.10    0.71 
  -4  -6   0   11.46    0.69 
   4  -6   0   10.59    0.68 
  -4  -6   0   10.80    0.53 
   4   6   0   11.43    0.55 
   4  -6   0   10.50    0.50 
   4   6   0   10.31    0.68 
  -4  -6   0   10.23    0.69 
   4  -6   0   10.12    0.60 
   4  -6   0   10.22    0.74 
   4   6   0   11.85    0.74 
   4  -6   0    9.58    0.72 
   4  -6   0   11.41    0.61 
   4  -6   0   10.52    0.60 
   4  -6   0   11.09    0.64 
   4   6   0   10.43    0.70 
  -4   6   0   10.02    0.66 
   4   6   0   11.52    0.70 
  -4  -6   0   10.55    0.71 
  -4  -6   0   10.57    0.69 
   4  -6   0   10.40    0.68 
  -4   6   0    9.47    0.71 
  -4   6   0   10.69    0.66 
   4   6   0   10.87    0.60 
  -4  -6   0   10.94    0.66 
  -4   6   0    9.94    0.59 
   4   6   0   11.76    0.70 
  -5  -6   0   42.65    1.63 
   5   6   0   43.98    1.72 
   5  -6   0   41.12    1.57 
   5  -6   0   42.52    1.62 
  -5  -6   0   44.00    1.69 
  -5  -6   0   42.50    1.73 
   5  -6   0   42.76    1.58 
   5   6   0   41.81    1.61 
   5   6   0   39.27    1.70 
   5   6   0   41.89    1.72 
  -5   6   0   40.25    1.70 
  -5   6   0   40.73    1.58 
  -5  -6   0   43.13    1.75 
  -5   6   0   42.74    1.84 
   5  -6   0   40.29    1.58 
  -5   6   0   42.59    1.62 
   5   6   0   43.91    1.66 
   5   6   0   42.73    1.45 
  -5  -6   0   44.60    1.85 
   5  -6   0   39.89    1.70 
  -5   6   0   42.24    1.61 
   5  -6   0   43.48    1.51 
   5  -6   0   40.71    1.82 
   5   6   0   40.61    1.74 
  -5  -6   0   43.03    1.72 
  -5  -6   0   43.01    1.77 
   5  -6   0   40.14    1.79 
   5   6   0   43.74    1.77 
   6   6   0    4.48    0.54 
   6  -6   0    5.35    0.52 
  -6  -6   0    4.31    0.60 
  -6   6   0    4.01    0.44 
  -6  -6   0    4.21    0.54 
   6   6   0    3.97    0.52 
  -6   6   0    3.78    0.56 
   6   6   0    5.34    0.57 
   6  -6   0    3.70    0.59 
  -6  -6   0    4.37    0.55 
  -6  -6   0    5.17    0.63 
  -6   6   0    4.47    0.51 
   6   6   0    3.76    0.56 
  -6  -6   0    3.93    0.62 
   6  -6   0    4.06    0.56 
   6  -6   0    3.80    0.48 
   6   6   0    3.54    0.55 
   6  -6   0    4.14    0.47 
   6   6   0    3.53    0.54 
  -6   6   0    3.69    0.60 
   6  -6   0    6.09    0.79 
  -6  -6   0    4.54    0.60 
  -6  -6   0    4.19    0.57 
   7  -6   0    0.55    0.26 
  -7  -6   0    1.01    0.34 
   7  -6   0    0.55    0.31 
   7   6   0    0.49    0.29 
   7  -6   0    0.65    0.25 
   7   6   0    1.19    0.36 
   7  -6   0    1.14    0.35 
   7  -6   0    0.96    0.28 
   7   6   0    0.78    0.25 
  -7  -6   0    1.14    0.34 
  -7  -6   0    1.28    0.39 
  -7   6   0    0.72    0.33 
  -7  -6   0    0.75    0.33 
  -7   6   0    0.75    0.35 
   7   6   0    0.97    0.36 
   7   6   0    0.70    0.27 
   7  -6   0    0.99    0.38 
  -7   6   0    0.99    0.30 
   7   6   0    1.22    0.39 
  -7  -6   0    0.81    0.30 
   8   6   0    0.40    0.30 
   8   6   0    0.53    0.31 
   8  -6   0    0.21    0.23 
   8  -6   0    0.07    0.22 
  -8   6   0    0.41    0.27 
  -8  -6   0    0.36    0.30 
  -8  -6   0    0.52    0.32 
   8  -6   0    0.09    0.26 
  -8  -6   0    0.63    0.31 
  -8   6   0    0.70    0.37 
   8   6   0    0.27    0.29 
   8   6   0    0.41    0.30 
  -8  -6   0    0.35    0.27 
   8  -6   0    0.41    0.25 
  -8  -6   0    0.64    0.33 
   8  -6   0    0.50    0.24 
  -8   6   0    0.30    0.28 
   8  -6   0    0.85    0.40 
   9  -6   0    0.25    0.25 
  -9   6   0    0.10    0.29 
   9  -6   0   -0.09    0.25 
  -9  -6   0   -0.15    0.23 
  -9   6   0    0.32    0.38 
   9   6   0    0.39    0.28 
   9  -6   0   -0.09    0.17 
   9   6   0    0.49    0.32 
  -9  -6   0    0.10    0.30 
   9   6   0   -0.21    0.25 
   9  -6   0    0.02    0.21 
   9  -6   0    0.03    0.21 
  -9  -6   0    0.06    0.29 
   9  -6   0   -0.01    0.24 
  -9  -6   0   -0.17    0.25 
  -9  -6   0    0.38    0.29 
  -9   6   0   -0.09    0.23 
   9   6   0   -0.10    0.23 
 -10  -6   0    8.63    0.99 
  10  -6   0    8.98    1.19 
  10  -6   0    8.08    0.82 
  10   6   0    9.30    1.05 
 -10  -6   0   10.07    1.16 
 -10  -6   0    9.88    1.06 
  10  -6   0    8.83    0.91 
 -10   6   0    9.06    1.16 
  10   6   0    8.13    0.93 
 -10   6   0    9.05    1.11 
  10  -6   0   10.12    1.09 
  10  -6   0    7.98    1.00 
  10   6   0    8.12    1.04 
 -10   6   0    8.81    0.94 
  10   6   0   10.36    1.18 
 -10  -6   0   10.48    1.14 
 -10  -6   0    9.39    1.05 
 -11   6   0    4.98    0.95 
  11  -6   0    5.30    0.97 
  11   6   0    4.59    0.77 
 -11   6   0    4.74    0.85 
  11  -6   0    4.86    0.82 
 -11   6   0    4.78    0.74 
  11  -6   0    3.85    0.60 
 -11  -6   0    4.73    0.86 
 -11  -6   0    4.89    0.83 
  11  -6   0    4.54    0.69 
 -11  -6   0    5.31    0.83 
 -11  -6   0    4.28    0.75 
  11   6   0    4.86    0.85 
 -11  -6   0    3.54    0.70 
  11   6   0    4.29    0.74 
  11   6   0    5.81    0.97 
 -12   6   0    4.96    0.95 
 -12  -6   0    4.49    0.85 
  12  -6   0    3.39    0.65 
  12  -6   0    3.21    0.70 
 -12  -6   0    5.02    0.87 
 -12  -6   0    4.11    0.74 
  12  -6   0    4.04    0.65 
 -12   6   0    4.18    0.75 
  12   6   0    4.81    0.91 
 -12  -6   0    5.40    0.91 
  12  -6   0    4.18    0.92 
 -12   6   0    4.38    0.95 
  12   6   0    3.37    0.70 
  12   6   0    3.18    0.76 
 -12  -6   0    5.88    1.03 
  12   6   0    3.33    0.71 
 -13   6   0    4.40    0.97 
 -13   6   0    6.48    1.10 
  13   6   0    4.91    0.96 
  13  -6   0    4.65    0.69 
  13  -6   0    3.30    0.66 
  13  -6   0    5.46    1.10 
 -13   6   0    4.15    0.81 
  13   6   0    4.01    0.82 
 -13  -6   0    4.08    0.82 
  13  -6   0    4.37    0.88 
  13   6   0    5.34    1.00 
 -13  -6   0    5.32    0.97 
  13   6   0    3.65    0.79 
   0  -7   0   -0.14    0.14 
   0  -7   0    0.13    0.16 
   0   7   0   -0.17    0.16 
   0  -7   0   -0.11    0.14 
   0   7   0    0.00    0.17 
   0   7   0    0.09    0.15 
   0   7   0   -0.05    0.07 
   0  -7   0   -0.17    0.13 
   0   7   0   -0.15    0.13 
   0   7   0   -0.16    0.11 
   0  -7   0   -0.01    0.13 
   0  -7   0   -0.02    0.13 
   0  -7   0   -0.14    0.11 
   0   7   0    0.04    0.11 
  -1  -7   0    8.54    0.56 
  -1  -7   0    8.31    0.53 
  -1  -7   0    9.55    0.57 
   1   7   0    8.16    0.54 
   1  -7   0    8.39    0.54 
   1   7   0    6.81    0.66 
  -1  -7   0    7.99    0.57 
  -1   7   0    8.01    0.55 
   1   7   0    8.86    0.58 
   1  -7   0    8.78    0.59 
   1  -7   0    7.70    0.58 
   1  -7   0    7.94    0.54 
   1   7   0    8.44    0.43 
  -1  -7   0    8.60    0.57 
  -1   7   0    8.98    0.63 
  -1   7   0    7.45    0.59 
   1  -7   0    8.34    0.50 
  -1   7   0    7.67    0.51 
   1   7   0    7.71    0.60 
   1  -7   0    8.27    0.52 
   1   7   0    8.31    0.41 
  -1  -7   0    8.13    0.58 
  -1  -7   0    8.06    0.53 
   1  -7   0    8.42    0.49 
  -1   7   0    8.15    0.53 
  -1   7   0    8.02    0.45 
   1   7   0    8.17    0.55 
   2  -7   0   44.90    1.79 
   2   7   0   48.93    1.77 
  -2   7   0   44.84    1.70 
   2   7   0   45.14    1.77 
  -2  -7   0   44.44    1.75 
   2  -7   0   45.38    1.84 
   2   7   0   44.63    1.60 
   2  -7   0   47.32    1.65 
  -2  -7   0   45.26    1.69 
  -2  -7   0   46.49    1.76 
   2  -7   0   45.00    1.54 
  -2   7   0   47.79    1.70 
  -2  -7   0   46.99    1.74 
   2  -7   0   50.85    1.72 
  -2   7   0   47.03    1.61 
  -2   7   0   45.90    1.66 
  -2  -7   0   45.01    1.66 
   2  -7   0   47.32    1.70 
   2  -7   0   46.03    1.66 
  -2   7   0   45.64    1.81 
   2   7   0   46.11    1.51 
   2  -7   0   45.78    1.72 
   2   7   0   45.89    1.73 
  -2  -7   0   45.13    1.71 
   2   7   0   45.66    1.84 
   2   7   0   44.73    1.70 
  -2  -7   0   45.82    1.80 
  -2   7   0   47.80    1.81 
   3  -7   0   23.34    1.08 
   3   7   0   23.13    1.09 
  -3   7   0   23.22    1.08 
  -3  -7   0   22.88    1.04 
  -3   7   0   21.60    1.02 
  -3  -7   0   24.01    1.11 
   3   7   0   23.71    1.08 
   3  -7   0   21.81    1.16 
  -3  -7   0   22.94    1.15 
  -3   7   0   25.37    1.19 
   3  -7   0   23.21    1.01 
  -3   7   0   23.12    1.13 
  -3  -7   0   23.16    1.08 
   3   7   0   23.19    1.12 
   3   7   0   21.31    1.09 
   3   7   0   22.31    1.13 
   3  -7   0   25.33    1.02 
   3   7   0   23.16    0.92 
  -3   7   0   22.96    1.12 
   3  -7   0   24.72    0.85 
  -3   7   0   23.74    1.02 
   3  -7   0   24.09    0.73 
   3   7   0   23.48    1.03 
   3  -7   0   23.08    1.02 
   3  -7   0   23.29    1.12 
   3  -7   0   23.21    1.17 
   3  -7   0   25.12    1.06 
  -3   7   0   24.09    1.05 
  -3  -7   0   22.33    0.96 
  -3  -7   0   22.21    1.09 
  -3  -7   0   21.53    1.10 
   4  -7   0   35.87    1.40 
  -4   7   0   35.58    1.54 
  -4  -7   0   34.27    1.50 
  -4  -7   0   34.83    1.49 
   4  -7   0   35.68    1.53 
   4   7   0   32.60    1.51 
   4  -7   0   35.92    1.51 
   4  -7   0   38.08    1.40 
   4   7   0   33.89    1.45 
  -4   7   0   35.99    1.60 
   4  -7   0   32.97    1.58 
   4  -7   0   35.17    1.40 
   4  -7   0   36.61    1.10 
   4  -7   0   34.35    1.59 
   4  -7   0   37.55    1.19 
   4   7   0   33.60    1.51 
   4   7   0   34.67    1.48 
  -4  -7   0   35.90    1.31 
  -4   7   0   34.94    1.44 
  -4   7   0   34.88    1.50 
  -4   7   0   34.14    1.38 
  -4  -7   0   35.54    1.56 
   4   7   0   35.45    1.34 
   4   7   0   36.03    1.33 
   4  -7   0   37.66    1.44 
  -4  -7   0   37.29    1.62 
   4   7   0   37.46    1.53 
   4   7   0   35.49    1.54 
  -4  -7   0   36.45    1.46 
  -4  -7   0   34.37    1.51 
  -4   7   0   34.88    1.41 
   5  -7   0    4.96    0.66 
   5   7   0    5.35    0.53 
  -5  -7   0    5.54    0.66 
  -5   7   0    3.39    0.44 
   5   7   0    4.38    0.60 
   5   7   0    6.29    0.71 
  -5   7   0    5.72    0.65 
  -5   7   0    5.09    0.55 
  -5  -7   0    5.16    0.54 
  -5  -7   0    5.23    0.64 
  -5  -7   0    4.91    0.69 
  -5   7   0    4.55    0.55 
   5  -7   0    4.32    0.64 
   5   7   0    4.90    0.57 
   5  -7   0    5.63    0.56 
  -5   7   0    5.11    0.69 
  -5  -7   0    4.68    0.58 
   5  -7   0    3.67    0.53 
   5  -7   0    4.72    0.34 
   5   7   0    4.56    0.57 
  -5  -7   0    4.89    0.36 
   5   7   0    4.96    0.37 
  -5  -7   0    4.33    0.53 
   5   7   0    5.25    0.65 
   5  -7   0    4.30    0.49 
   5   7   0    4.40    0.55 
  -5  -7   0    4.66    0.62 
   6   7   0   81.65    2.93 
   6   7   0   79.93    2.96 
  -6  -7   0   81.12    2.89 
  -6   7   0   75.64    3.02 
  -6  -7   0   80.28    2.93 
   6  -7   0   81.44    2.60 
  -6  -7   0   81.36    2.97 
  -6   7   0   76.10    2.72 
  -6   7   0   78.53    2.72 
   6  -7   0   77.24    2.68 
  -6   7   0   77.49    2.87 
  -6  -7   0   80.65    2.84 
   6   7   0   78.09    2.89 
  -6  -7   0   79.25    2.76 
   6   7   0   77.21    2.73 
   6  -7   0   78.94    2.90 
  -6  -7   0   78.57    2.90 
   6  -7   0   74.90    2.96 
   6  -7   0   75.56    3.01 
   6  -7   0   78.02    2.71 
   6   7   0   79.26    2.79 
   6   7   0   77.12    2.84 
  -6  -7   0   78.31    3.01 
   7   7   0    4.13    0.66 
   7   7   0    5.45    0.64 
   7  -7   0    3.44    0.65 
  -7  -7   0    4.77    0.71 
  -7  -7   0    4.11    0.64 
   7   7   0    4.53    0.66 
   7   7   0    4.63    0.56 
  -7  -7   0    4.11    0.60 
  -7   7   0    4.08    0.53 
  -7   7   0    3.62    0.61 
   7   7   0    4.11    0.62 
  -7  -7   0    3.25    0.58 
   7  -7   0    4.40    0.50 
   7  -7   0    4.06    0.52 
   7   7   0    3.18    0.56 
   7  -7   0    4.92    0.70 
  -7   7   0    3.94    0.70 
   7  -7   0    3.31    0.56 
  -7  -7   0    3.48    0.54 
  -7   7   0    3.99    0.56 
   7  -7   0    4.53    0.54 
  -8  -7   0   44.26    2.00 
   8   7   0   43.15    2.06 
   8  -7   0   44.86    1.85 
   8  -7   0   45.51    1.82 
   8   7   0   42.96    2.09 
  -8   7   0   44.89    1.88 
   8   7   0   43.89    1.99 
  -8  -7   0   44.58    1.98 
  -8  -7   0   44.61    2.07 
  -8  -7   0   46.05    2.09 
  -8  -7   0   46.87    1.98 
   8  -7   0   40.40    2.13 
   8  -7   0   43.22    2.07 
   8   7   0   44.66    2.03 
  -8   7   0   42.42    2.03 
  -8   7   0   45.83    2.22 
   8  -7   0   45.17    2.04 
  -9  -7   0    0.53    0.33 
  -9  -7   0    1.13    0.41 
  -9  -7   0    0.88    0.43 
  -9  -7   0    0.62    0.34 
   9  -7   0    0.38    0.30 
  -9   7   0    0.59    0.31 
  -9   7   0    0.47    0.40 
   9  -7   0    0.54    0.27 
  -9   7   0    0.58    0.38 
   9   7   0    0.36    0.35 
   9  -7   0    0.97    0.35 
  -9  -7   0    0.49    0.31 
   9   7   0    0.61    0.35 
   9  -7   0    0.52    0.31 
   9   7   0    0.49    0.34 
   9  -7   0    0.05    0.31 
   9   7   0    0.15    0.26 
  10  -7   0   31.83    1.76 
 -10   7   0   31.22    1.61 
 -10   7   0   30.86    1.82 
 -10   7   0   30.52    1.90 
 -10  -7   0   33.22    1.76 
  10   7   0   31.37    1.76 
 -10  -7   0   26.85    1.65 
  10  -7   0   32.09    1.94 
  10   7   0   30.30    1.80 
 -10  -7   0   32.75    1.74 
 -10  -7   0   35.68    1.89 
  10  -7   0   28.82    1.52 
  10  -7   0   30.64    1.74 
  10  -7   0   31.44    1.50 
 -10  -7   0   29.24    1.68 
  10   7   0   30.12    1.68 
  10   7   0   32.99    1.87 
  11   7   0    0.02    0.35 
  11   7   0    0.08    0.36 
  11  -7   0    0.14    0.24 
  11   7   0    0.37    0.35 
 -11   7   0   -0.02    0.30 
 -11  -7   0   -0.15    0.27 
  11  -7   0   -0.17    0.25 
 -11  -7   0    0.08    0.33 
  11   7   0    0.07    0.43 
 -11  -7   0    0.24    0.30 
 -11   7   0   -0.47    0.30 
 -11  -7   0    0.43    0.42 
  11  -7   0   -0.53    0.28 
  11  -7   0    0.01    0.33 
 -11  -7   0    0.31    0.35 
 -11   7   0    0.23    0.44 
  11  -7   0    0.25    0.34 
  12   7   0   17.72    1.39 
 -12  -7   0   17.59    1.35 
 -12  -7   0   19.14    1.42 
 -12  -7   0   18.15    1.38 
  12   7   0   16.13    1.67 
  12  -7   0   18.37    1.90 
  12  -7   0   15.63    1.57 
 -12   7   0   14.55    1.60 
 -12  -7   0   20.41    1.85 
  12  -7   0   17.40    1.12 
  12   7   0   16.98    1.73 
  12   7   0   18.69    1.38 
 -12   7   0   18.08    1.32 
 -12   7   0   22.54    1.70 
  12  -7   0   18.80    1.26 
  13   7   0    0.25    0.43 
  13  -7   0    0.20    0.38 
  13   7   0   -0.05    0.37 
 -13  -7   0   -0.33    0.32 
 -13  -7   0   -0.03    0.41 
  13   7   0   -0.61    0.29 
  13   7   0   -0.25    0.37 
 -13   7   0    0.18    0.39 
  13  -7   0    0.09    0.27 
 -13   7   0    0.70    0.50 
  13  -7   0   -0.33    0.26 
  13  -7   0    0.33    0.39 
 -13   7   0    0.06    0.46 
   0   8   0  143.87    4.63 
   0   8   0  142.16    4.68 
   0  -8   0  144.22    4.59 
   0   8   0  142.81    4.51 
   0  -8   0  147.48    4.56 
   0   8   0  137.01    4.45 
   0   8   0  146.48    4.51 
   0  -8   0  147.01    4.49 
   0  -8   0  147.67    4.57 
   0   8   0  143.53    4.31 
   0  -8   0  151.09    4.47 
   0   8   0  141.85    4.14 
   0  -8   0  140.73    4.44 
   0  -8   0  143.93    4.46 
   1  -8   0  116.09    3.43 
  -1  -8   0  104.16    3.50 
   1   8   0  107.65    3.49 
  -1  -8   0  109.72    3.49 
  -1   8   0  111.47    3.50 
  -1   8   0  106.94    3.63 
   1  -8   0  108.37    3.51 
  -1  -8   0  111.34    3.50 
   1   8   0  112.64    3.54 
   1   8   0  107.87    3.25 
   1  -8   0  107.81    3.63 
   1   8   0  104.11    3.66 
   1  -8   0  109.41    3.45 
   1  -8   0  107.41    3.56 
  -1  -8   0  105.08    3.54 
  -1  -8   0  103.48    3.56 
   1   8   0  107.81    3.25 
   1  -8   0  107.64    3.49 
  -1   8   0  100.94    3.65 
   1   8   0  108.82    3.61 
  -1   8   0  110.89    3.46 
   1  -8   0  107.21    3.39 
  -1  -8   0  104.92    3.51 
  -1   8   0  105.87    3.50 
   1   8   0  109.49    3.52 
  -1   8   0  109.44    3.33 
  -1  -8   0  108.97    3.48 
  -2  -8   0  119.73    3.90 
   2   8   0  115.97    4.00 
  -2   8   0  120.07    3.79 
   2   8   0  117.01    3.92 
  -2  -8   0  122.99    3.97 
   2   8   0  119.44    3.82 
  -2   8   0  126.22    3.83 
   2  -8   0  127.66    3.84 
   2  -8   0  118.67    3.94 
  -2   8   0  110.92    3.95 
   2  -8   0  127.90    3.80 
   2   8   0  120.69    3.58 
   2  -8   0  120.04    4.00 
  -2  -8   0  118.07    3.81 
  -2  -8   0  115.50    3.79 
  -2   8   0  116.60    3.83 
   2  -8   0  121.09    3.85 
  -2   8   0  121.26    3.69 
   2  -8   0  117.89    3.64 
  -2  -8   0  122.28    3.87 
   2   8   0  121.60    3.88 
  -2   8   0  115.12    3.93 
   2   8   0  118.80    3.88 
  -2  -8   0  118.81    3.84 
  -2  -8   0  118.58    3.89 
   2  -8   0  118.28    3.81 
   2   8   0  116.38    3.67 
   3  -8   0   37.03    1.44 
  -3   8   0   36.05    1.62 
   3   8   0   38.40    1.67 
   3   8   0   37.15    1.59 
  -3  -8   0   38.05    1.59 
   3   8   0   38.79    1.55 
   3  -8   0   36.63    1.54 
   3  -8   0   36.57    1.64 
   3  -8   0   37.71    1.47 
  -3  -8   0   39.22    1.68 
   3   8   0   37.66    1.34 
   3  -8   0   36.53    1.48 
   3   8   0   37.04    1.60 
   3  -8   0   36.53    1.50 
   3  -8   0   37.89    1.29 
  -3   8   0   37.83    1.52 
  -3  -8   0   40.08    1.54 
  -3  -8   0   37.63    1.58 
   3   8   0   38.76    1.48 
   3  -8   0   36.26    1.67 
  -3  -8   0   34.06    1.57 
  -3  -8   0   37.82    1.45 
  -3  -8   0   39.07    1.57 
  -3   8   0   37.66    1.45 
  -3   8   0   36.49    1.63 
  -3   8   0   36.66    1.62 
   3  -8   0   36.30    1.60 
  -4   8   0   39.96    1.72 
   4  -8   0   40.07    1.56 
   4  -8   0   39.79    1.56 
   4  -8   0   40.09    1.28 
  -4  -8   0   40.67    1.70 
   4   8   0   40.38    1.72 
  -4   8   0   38.60    1.59 
  -4   8   0   40.40    1.70 
  -4  -8   0   39.07    1.68 
  -4  -8   0   38.32    1.75 
  -4   8   0   39.27    1.77 
   4  -8   0   36.47    1.53 
   4   8   0   40.32    1.73 
  -4   8   0   38.84    1.58 
   4  -8   0   35.98    1.74 
  -4   8   0   40.78    1.60 
   4  -8   0   40.53    1.79 
  -4  -8   0   40.82    1.68 
   4  -8   0   39.12    1.29 
   4   8   0   39.97    1.72 
  -4  -8   0   39.59    1.47 
   4   8   0   40.15    1.69 
  -4  -8   0   40.80    1.62 
   4  -8   0   40.84    1.68 
   4   8   0   38.52    1.46 
  -4  -8   0   39.71    1.73 
   4   8   0   38.90    1.60 
   4  -8   0   38.15    1.69 
   4   8   0   40.51    1.66 
   5   8   0   46.82    1.91 
   5  -8   0   44.74    1.77 
   5  -8   0   49.30    2.09 
  -5   8   0   47.96    1.99 
  -5  -8   0   50.16    2.00 
   5   8   0   46.17    1.97 
  -5  -8   0   44.38    1.64 
   5   8   0   50.49    1.70 
   5  -8   0   43.88    1.91 
  -5   8   0   44.92    2.04 
  -5  -8   0   47.98    2.07 
  -5   8   0   44.32    1.85 
   5   8   0   45.76    1.74 
   5   8   0   47.51    1.92 
   5  -8   0   45.73    1.78 
  -5  -8   0   46.34    1.76 
  -5  -8   0   46.55    1.93 
   5  -8   0   45.97    2.06 
  -5  -8   0   48.98    1.89 
  -5   8   0   44.43    1.80 
   5  -8   0   45.90    1.95 
   5   8   0   48.20    1.96 
   5   8   0   46.35    1.92 
  -5   8   0   47.69    1.91 
   5   8   0   45.25    1.97 
  -5  -8   0   47.25    1.95 
  -5  -8   0   47.59    2.02 
  -6   8   0   16.29    1.12 
   6  -8   0   15.33    0.88 
  -6   8   0   16.32    1.02 
   6   8   0   16.32    1.02 
   6   8   0   14.64    1.02 
   6  -8   0   15.42    1.11 
   6  -8   0   17.21    1.14 
  -6  -8   0   16.02    0.97 
  -6   8   0   17.66    0.98 
  -6  -8   0   16.41    1.03 
  -6  -8   0   17.25    0.94 
  -6  -8   0   16.65    1.08 
   6  -8   0   16.78    0.92 
   6   8   0   16.03    1.04 
  -6  -8   0   17.02    1.09 
  -6   8   0   17.70    1.10 
  -6  -8   0   17.84    1.07 
  -6  -8   0   17.09    1.15 
   6  -8   0   14.88    1.00 
   6   8   0   16.42    1.03 
  -6   8   0   14.91    0.91 
   6   8   0   16.35    0.90 
  -7   8   0   -0.08    0.25 
   7   8   0    0.09    0.19 
  -7  -8   0   -0.12    0.19 
   7  -8   0   -0.18    0.27 
   7  -8   0    0.44    0.23 
   7  -8   0    0.06    0.18 
  -7   8   0    0.10    0.19 
  -7  -8   0    0.14    0.28 
   7   8   0    0.42    0.28 
   7   8   0    0.13    0.22 
   7   8   0    0.13    0.28 
  -7  -8   0    0.09    0.30 
  -7   8   0    0.28    0.24 
   7  -8   0    0.12    0.26 
  -7  -8   0   -0.18    0.25 
   7  -8   0    0.22    0.28 
  -7   8   0    0.09    0.27 
   7   8   0    0.00    0.25 
   7   8   0   -0.08    0.25 
  -7  -8   0   -0.07    0.20 
  -8  -8   0    0.00    0.25 
   8  -8   0   -0.16    0.19 
   8  -8   0   -0.01    0.23 
  -8   8   0   -0.07    0.30 
   8   8   0   -0.24    0.24 
   8  -8   0   -0.11    0.18 
  -8  -8   0   -0.37    0.23 
   8   8   0   -0.04    0.22 
  -8  -8   0   -0.37    0.20 
   8   8   0   -0.15    0.25 
  -8  -8   0   -0.12    0.22 
  -8  -8   0    0.32    0.31 
  -8   8   0    0.01    0.22 
   8   8   0   -0.04    0.24 
  -8   8   0    0.24    0.27 
   8  -8   0   -0.36    0.20 
   8  -8   0    0.13    0.26 
   9  -8   0    0.34    0.37 
  -9   8   0    0.39    0.34 
   9   8   0    0.63    0.37 
   9   8   0   -0.10    0.28 
   9  -8   0    0.12    0.22 
  -9  -8   0    0.41    0.41 
   9   8   0    0.49    0.37 
  -9   8   0    0.18    0.35 
  -9  -8   0   -0.16    0.26 
  -9  -8   0    0.16    0.29 
   9  -8   0   -0.04    0.20 
  -9   8   0    0.15    0.27 
   9  -8   0   -0.06    0.27 
   9   8   0   -0.04    0.30 
  -9  -8   0    0.08    0.24 
  -9  -8   0    0.12    0.32 
   9  -8   0    0.07    0.29 
 -10   8   0    0.81    0.47 
 -10  -8   0    1.41    0.45 
  10  -8   0    1.64    0.53 
  10   8   0    1.26    0.52 
  10  -8   0    1.12    0.44 
 -10   8   0    1.07    0.42 
 -10  -8   0    2.36    0.65 
  10  -8   0    1.19    0.36 
  10   8   0    1.87    0.56 
 -10  -8   0    1.83    0.55 
 -10  -8   0    0.93    0.46 
  10  -8   0    1.42    0.62 
 -10  -8   0    0.85    0.44 
  10   8   0    2.12    0.62 
  10  -8   0    1.92    0.48 
  10   8   0    1.64    0.53 
 -10   8   0    1.43    0.53 
  11   8   0    4.51    0.85 
  11   8   0    4.45    0.80 
 -11  -8   0    5.18    0.88 
 -11   8   0    4.55    0.88 
  11  -8   0    4.94    0.87 
  11  -8   0    4.93    0.67 
 -11   8   0    4.62    0.97 
 -11  -8   0    4.56    0.84 
  11   8   0    4.00    0.84 
  11  -8   0    4.29    0.72 
 -11  -8   0    4.07    0.77 
  11   8   0    4.68    0.90 
  11  -8   0    4.84    0.89 
 -11   8   0    5.31    0.80 
 -11  -8   0    4.47    0.83 
  11  -8   0    5.11    1.04 
 -12  -8   0    0.88    0.46 
 -12   8   0    0.51    0.45 
  12  -8   0    0.64    0.32 
 -12   8   0    0.37    0.46 
  12   8   0    0.53    0.44 
  12   8   0    0.37    0.49 
  12   8   0    0.49    0.44 
 -12   8   0    0.96    0.46 
  12   8   0    0.63    0.46 
  12  -8   0    0.85    0.48 
  12  -8   0    0.48    0.45 
 -12  -8   0    0.42    0.40 
  12  -8   0    0.82    0.41 
  13   8   0    8.02    1.24 
  13   8   0    9.75    1.31 
 -13   8   0    9.52    1.14 
 -13  -8   0    9.02    1.25 
  13   8   0    9.00    1.16 
  13   8   0    8.49    1.19 
 -13   8   0    8.54    1.27 
  13  -8   0    8.50    1.24 
  13  -8   0    9.21    1.41 
 -13   8   0    8.02    1.33 
  13  -8   0    7.19    0.92 
  13  -8   0    9.22    0.96 
   0   9   0    0.11    0.14 
   0   9   0    0.08    0.07 
   0  -9   0   -0.08    0.14 
   0   9   0    0.19    0.19 
   0   9   0   -0.24    0.13 
   0   9   0    0.07    0.20 
   0   9   0   -0.02    0.20 
   0  -9   0    0.20    0.20 
   0  -9   0   -0.20    0.13 
   0  -9   0    0.02    0.14 
   0  -9   0    0.20    0.20 
   0  -9   0    0.10    0.17 
   0  -9   0   -0.06    0.14 
   0   9   0   -0.11    0.14 
   1  -9   0   47.03    1.87 
  -1   9   0   52.76    1.91 
  -1  -9   0   45.14    1.84 
  -1  -9   0   48.15    1.90 
  -1  -9   0   52.03    1.87 
   1  -9   0   47.42    1.97 
  -1  -9   0   46.11    1.86 
   1   9   0   47.66    1.88 
   1  -9   0   47.10    1.75 
  -1  -9   0   47.40    1.93 
   1   9   0   49.15    1.89 
  -1   9   0   51.81    2.08 
   1   9   0   45.98    1.83 
  -1  -9   0   47.47    1.84 
  -1   9   0   45.18    1.95 
  -1  -9   0   51.28    1.87 
   1   9   0   46.34    1.94 
   1   9   0   44.04    1.98 
  -1   9   0   49.62    1.70 
   1   9   0   47.99    1.59 
   1  -9   0   50.90    1.87 
  -1   9   0   48.18    1.87 
   1  -9   0   48.11    1.92 
   1  -9   0   48.84    1.82 
   1   9   0   49.38    1.61 
  -1   9   0   46.31    1.80 
  -2  -9   0    2.80    0.44 
  -2   9   0    2.78    0.44 
   2   9   0    3.92    0.49 
  -2  -9   0    4.36    0.56 
   2   9   0    3.01    0.46 
   2  -9   0    3.49    0.50 
  -2   9   0    3.84    0.52 
   2  -9   0    2.65    0.48 
   2  -9   0    3.52    0.46 
  -2   9   0    3.65    0.59 
  -2  -9   0    2.64    0.42 
   2   9   0    3.51    0.57 
  -2  -9   0    2.73    0.46 
   2  -9   0    3.37    0.38 
   2   9   0    3.16    0.48 
  -2  -9   0    3.10    0.52 
   2   9   0    3.48    0.38 
  -2   9   0    3.29    0.53 
  -2  -9   0    2.88    0.46 
  -2  -9   0    3.43    0.46 
   2   9   0    3.02    0.32 
   2  -9   0    3.30    0.55 
   2  -9   0    2.72    0.42 
   2   9   0    3.17    0.52 
  -2   9   0    3.30    0.40 
   3  -9   0   24.17    1.10 
   3  -9   0   24.46    1.18 
  -3  -9   0   22.91    1.07 
  -3   9   0   23.23    1.24 
  -3  -9   0   24.62    1.21 
   3   9   0   25.00    1.24 
   3   9   0   22.18    1.25 
  -3  -9   0   23.87    1.15 
   3   9   0   22.77    1.15 
  -3   9   0   23.55    1.05 
   3   9   0   21.67    1.20 
   3  -9   0   24.09    0.93 
  -3  -9   0   22.51    1.24 
   3  -9   0   22.25    1.10 
   3  -9   0   23.51    1.29 
   3  -9   0   22.28    1.23 
  -3  -9   0   26.42    1.22 
   3   9   0   24.69    0.96 
  -3   9   0   23.31    1.24 
  -3  -9   0   21.70    1.16 
  -3  -9   0   22.76    1.21 
   3   9   0   21.61    1.16 
   3   9   0   23.53    1.06 
  -3   9   0   23.94    1.16 
  -3   9   0   22.35    1.25 
  -4   9   0    0.75    0.27 
   4   9   0    1.33    0.30 
   4  -9   0    0.63    0.31 
   4   9   0    0.90    0.31 
   4   9   0    1.35    0.36 
  -4   9   0    1.15    0.36 
   4  -9   0    1.03    0.30 
  -4  -9   0    0.96    0.31 
  -4   9   0    1.18    0.34 
  -4  -9   0    0.46    0.27 
  -4  -9   0    0.85    0.32 
   4  -9   0    0.89    0.35 
   4   9   0    1.61    0.38 
  -4  -9   0    1.03    0.37 
   4  -9   0    0.75    0.25 
  -4   9   0    0.75    0.26 
   4  -9   0    0.23    0.23 
   4   9   0    0.87    0.23 
   4   9   0    1.06    0.37 
  -4  -9   0    1.02    0.26 
  -4   9   0    1.09    0.36 
  -4  -9   0    1.44    0.38 
  -4  -9   0    1.28    0.39 
   4   9   0    1.34    0.39 
   4  -9   0    1.09    0.29 
   4  -9   0    0.91    0.27 
  -5  -9   0  112.14    3.96 
   5  -9   0  101.83    3.91 
   5  -9   0  110.06    3.62 
   5   9   0  109.23    3.80 
   5  -9   0  112.58    3.81 
  -5  -9   0  110.33    3.71 
  -5  -9   0  110.65    3.81 
  -5   9   0  114.24    3.81 
  -5   9   0  104.28    3.91 
   5   9   0  107.15    3.51 
   5   9   0  105.74    3.73 
   5  -9   0  103.52    3.91 
   5   9   0  111.45    3.87 
   5  -9   0  109.44    3.84 
  -5  -9   0  110.97    3.48 
  -5   9   0  111.66    3.69 
  -5   9   0  110.90    3.69 
   5   9   0  115.43    3.76 
   5   9   0  108.87    3.49 
   5  -9   0  106.51    3.60 
  -5   9   0  104.71    3.83 
   5   9   0  105.72    3.84 
  -5  -9   0  104.69    3.85 
  -5  -9   0  115.86    3.83 
  -5  -9   0  113.86    3.85 
  -5   9   0  109.02    3.68 
   5   9   0  106.18    3.81 
  -5  -9   0  110.18    3.55 
   6  -9   0   11.22    1.08 
  -6   9   0    8.96    0.98 
   6   9   0    7.75    0.86 
  -6   9   0    9.72    0.74 
  -6  -9   0    8.94    0.67 
   6  -9   0    9.03    0.69 
   6   9   0    9.67    0.92 
  -6  -9   0   11.24    1.08 
  -6  -9   0    9.53    1.08 
   6   9   0    8.85    0.64 
   6  -9   0    8.69    0.67 
   6   9   0    8.69    0.97 
   6  -9   0   10.96    1.17 
  -6   9   0   10.21    0.80 
  -6   9   0   10.74    1.12 
  -6  -9   0    8.58    0.93 
   6  -9   0    8.70    0.99 
  -6  -9   0    9.06    0.96 
   6   9   0    8.72    0.88 
   6   9   0   10.14    0.96 
  -6   9   0   11.03    0.80 
  -6  -9   0    9.33    0.90 
   7  -9   0   26.26    1.51 
  -7  -9   0   28.96    1.57 
  -7  -9   0   27.79    1.35 
  -7  -9   0   28.97    1.45 
   7  -9   0   25.82    1.28 
  -7   9   0   26.89    1.36 
   7   9   0   25.05    1.29 
   7   9   0   27.74    1.42 
  -7   9   0   28.38    1.41 
  -7  -9   0   27.20    1.55 
   7  -9   0   27.88    1.61 
  -7   9   0   27.80    1.55 
   7  -9   0   25.34    1.59 
   7   9   0   28.73    1.54 
  -7  -9   0   26.34    1.47 
  -7   9   0   27.81    1.63 
   7   9   0   30.21    1.55 
   7   9   0   27.31    1.47 
   7  -9   0   28.48    1.36 
  -7   9   0   29.45    1.51 
   7   9   0   25.16    1.51 
  -8   9   0   -0.04    0.29 
  -8   9   0    0.24    0.30 
  -8   9   0    0.13    0.34 
  -8  -9   0    0.25    0.36 
   8   9   0    0.03    0.26 
  -8  -9   0    0.25    0.26 
   8  -9   0    0.17    0.28 
   8   9   0    0.28    0.29 
  -8  -9   0    0.44    0.37 
   8  -9   0    0.39    0.27 
   8   9   0    0.41    0.40 
  -8   9   0    0.53    0.29 
  -8  -9   0    0.23    0.28 
   8  -9   0    0.67    0.49 
  -8  -9   0    0.33    0.31 
   8  -9   0    0.78    0.37 
   8   9   0    0.07    0.30 
  -9  -9   0   31.90    1.74 
  -9   9   0   31.13    1.76 
   9  -9   0   30.76    1.53 
   9   9   0   30.08    1.73 
   9   9   0   33.55    1.74 
  -9  -9   0   33.35    1.70 
   9  -9   0   31.14    1.92 
  -9   9   0   29.57    1.88 
  -9  -9   0   31.48    1.80 
   9  -9   0   28.90    1.71 
  -9  -9   0   29.22    1.75 
   9  -9   0   31.97    1.82 
  -9   9   0   32.11    1.61 
   9   9   0   28.86    1.76 
   9   9   0   33.26    1.82 
  -9   9   0   28.15    1.72 
   9  -9   0   29.42    1.45 
  10  -9   0    5.81    0.94 
 -10  -9   0    6.67    0.97 
 -10   9   0    5.07    0.88 
  10  -9   0    5.21    0.68 
  10  -9   0    5.29    0.84 
  10   9   0    4.60    0.85 
  10  -9   0    5.70    1.05 
 -10   9   0    5.54    0.99 
 -10   9   0    5.49    0.81 
 -10  -9   0    6.32    0.94 
  10   9   0    5.94    0.88 
  10   9   0    4.78    0.83 
  10   9   0    3.50    0.74 
 -10  -9   0    5.16    0.80 
  11   9   0   28.41    1.88 
  11   9   0   27.22    1.84 
 -11  -9   0   31.05    1.88 
  11   9   0   27.76    1.79 
  11  -9   0   28.20    1.44 
  11  -9   0   29.40    1.83 
  11  -9   0   27.43    1.96 
  11   9   0   28.90    1.74 
 -11  -9   0   29.79    1.82 
 -11   9   0   27.01    1.94 
  11  -9   0   25.17    1.70 
  11  -9   0   27.16    1.54 
 -11   9   0   28.16    1.63 
 -11   9   0   29.57    1.86 
  12   9   0   -0.14    0.36 
  12   9   0   -0.30    0.39 
 -12   9   0    1.07    0.48 
  12  -9   0    0.51    0.47 
 -12   9   0    0.69    0.45 
  12  -9   0   -0.27    0.38 
 -12   9   0    0.12    0.44 
  12   9   0   -0.06    0.32 
  12  -9   0    0.58    0.37 
  12  -9   0    0.53    0.28 
  12   9   0    0.94    0.51 
 -12  -9   0   -0.15    0.38 
 -13  -9   0    6.89    1.12 
  13   9   0    6.38    1.09 
  13   9   0    7.04    1.06 
   0  10   0  126.89    4.27 
   0  10   0  123.19    4.12 
   0 -10   0  125.03    4.18 
   0 -10   0  123.99    4.21 
   0 -10   0  122.11    4.07 
   0  10   0  128.55    3.85 
   0  10   0  127.04    4.15 
   0  10   0  125.28    4.35 
   0  10   0  127.87    4.16 
   0 -10   0  128.67    4.09 
   0 -10   0  125.90    4.10 
   0 -10   0  126.90    4.20 
   1  10   0   29.72    1.10 
  -1 -10   0   32.73    1.41 
   1 -10   0   29.88    1.40 
   1  10   0   30.31    1.50 
   1  10   0   30.79    1.38 
   1 -10   0   32.84    1.39 
   1 -10   0   31.96    1.32 
   1  10   0   29.48    1.55 
   1 -10   0   29.74    1.44 
  -1  10   0   31.52    1.24 
   1 -10   0   31.85    1.40 
   1  10   0   31.53    1.43 
  -1 -10   0   29.43    1.38 
   1 -10   0   28.65    1.47 
  -1 -10   0   31.21    1.42 
  -1 -10   0   28.93    1.35 
  -1 -10   0   31.79    1.49 
  -1 -10   0   31.43    1.45 
   1  10   0   32.17    1.14 
  -1  10   0   30.31    1.41 
  -1  10   0   30.95    1.58 
   1  10   0   30.97    1.44 
  -2  10   0   33.44    1.34 
   2  10   0   33.97    1.28 
  -2 -10   0   33.39    1.47 
  -2 -10   0   33.98    1.50 
  -2  10   0   34.08    1.65 
   2 -10   0   32.43    1.31 
  -2 -10   0   31.85    1.44 
   2 -10   0   35.19    1.66 
  -2 -10   0   33.63    1.59 
  -2 -10   0   33.31    1.54 
   2  10   0   33.39    1.20 
   2  10   0   33.76    1.66 
   2  10   0   35.03    1.54 
   2 -10   0   33.63    1.43 
   2 -10   0   32.84    1.48 
  -2  10   0   34.19    1.51 
   2  10   0   32.80    1.48 
  -2  10   0   30.98    1.57 
   2 -10   0   32.17    1.46 
   2 -10   0   33.08    1.57 
   2  10   0   32.79    1.57 
  -2 -10   0   31.06    1.50 
   2  10   0   33.85    1.53 
   3  10   0    8.82    0.82 
  -3 -10   0    8.31    0.93 
  -3 -10   0    7.80    0.81 
   3 -10   0    9.21    0.86 
   3 -10   0    7.93    0.64 
   3 -10   0    7.60    0.61 
  -3 -10   0    8.01    0.61 
  -3 -10   0    7.11    0.79 
  -3 -10   0    8.49    0.66 
   3 -10   0    8.68    0.92 
  -3  10   0    7.47    0.84 
   3  10   0    8.02    0.82 
  -3  10   0    8.35    0.90 
  -3 -10   0    7.06    0.82 
   3  10   0    9.05    0.93 
   3  10   0    7.94    0.48 
   3 -10   0    8.02    0.91 
  -3  10   0    8.41    0.58 
   3  10   0    7.25    0.83 
   3 -10   0    8.29    0.50 
  -3 -10   0    9.18    0.86 
  -3  10   0    7.51    0.79 
   3  10   0    9.01    0.90 
   3  10   0    7.79    0.57 
  -3  10   0    8.80    0.91 
   4  10   0   17.06    1.05 
   4 -10   0   17.71    1.13 
   4  10   0   15.46    0.78 
   4 -10   0   15.40    0.98 
  -4 -10   0   15.77    1.07 
  -4 -10   0   15.47    1.00 
   4 -10   0   16.09    1.12 
   4  10   0   16.87    1.07 
  -4  10   0   16.59    1.09 
  -4 -10   0   15.49    1.04 
  -4  10   0   15.87    0.97 
  -4 -10   0   15.64    0.86 
  -4  10   0   15.17    1.04 
   4 -10   0   15.60    0.91 
  -4  10   0   16.97    0.92 
   4  10   0   17.19    1.11 
   4  10   0   16.60    1.02 
   4 -10   0   16.23    0.94 
  -4 -10   0   15.82    1.10 
  -4  10   0   16.62    1.08 
  -4 -10   0   16.55    1.05 
   4  10   0   15.99    0.93 
  -4 -10   0   15.52    0.96 
   4  10   0   16.47    1.06 
   5 -10   0    1.18    0.40 
   5  10   0    1.13    0.37 
   5  10   0    1.43    0.45 
  -5 -10   0    0.57    0.30 
  -5  10   0    0.74    0.30 
  -5 -10   0    0.82    0.34 
   5 -10   0    0.94    0.41 
   5 -10   0    1.08    0.33 
   5  10   0    0.80    0.24 
   5  10   0    1.42    0.43 
  -5 -10   0    0.82    0.38 
   5 -10   0    0.91    0.29 
  -5  10   0    1.21    0.35 
  -5  10   0    0.98    0.39 
   5 -10   0    1.05    0.41 
  -5  10   0    0.73    0.30 
   5  10   0    1.37    0.42 
  -5 -10   0    1.06    0.41 
  -5 -10   0    1.15    0.35 
   5  10   0    1.03    0.33 
  -5 -10   0    0.79    0.25 
   5 -10   0    1.25    0.38 
  -5  10   0    0.70    0.35 
  -6 -10   0    4.71    0.72 
  -6  10   0    3.65    0.60 
   6  10   0    3.65    0.63 
  -6 -10   0    3.93    0.66 
   6 -10   0    3.91    0.75 
  -6 -10   0    3.74    0.73 
   6  10   0    4.27    0.65 
  -6  10   0    3.74    0.60 
  -6  10   0    3.84    0.59 
  -6  10   0    3.13    0.65 
  -6  10   0    4.06    0.67 
   6  10   0    3.81    0.67 
  -6  10   0    3.90    0.60 
   6 -10   0    4.14    0.58 
   6 -10   0    3.92    0.55 
   6  10   0    3.46    0.58 
   6 -10   0    3.47    0.68 
  -6 -10   0    4.32    0.64 
   6  10   0    4.56    0.70 
   6 -10   0    3.25    0.61 
   6  10   0    4.06    0.53 
  -7  10   0    1.64    0.48 
   7  10   0    1.76    0.52 
  -7 -10   0    1.81    0.49 
   7  10   0    1.55    0.50 
   7  10   0    1.15    0.42 
   7  10   0    2.48    0.51 
   7 -10   0    1.18    0.46 
  -7  10   0    0.86    0.39 
   7 -10   0    1.50    0.38 
  -7 -10   0    1.53    0.48 
   7 -10   0    1.60    0.53 
  -7  10   0    1.58    0.43 
   7 -10   0    1.54    0.47 
  -7  10   0    1.23    0.46 
  -7  10   0    1.13    0.36 
   7 -10   0    2.66    0.48 
  -7 -10   0    1.49    0.41 
  -8  10   0   -0.02    0.32 
   8  10   0    0.27    0.29 
  -8  10   0    0.59    0.40 
   8 -10   0   -0.12    0.33 
  -8 -10   0    0.42    0.37 
   8  10   0    0.43    0.36 
   8 -10   0    0.46    0.32 
  -8  10   0    0.05    0.31 
  -8  10   0    0.55    0.35 
  -8 -10   0    1.07    0.37 
   8  10   0    0.48    0.38 
   8 -10   0    0.37    0.29 
   8 -10   0    0.72    0.47 
   8 -10   0    0.39    0.26 
  -8 -10   0   -0.17    0.29 
   8  10   0    0.38    0.30 
  -9 -10   0    2.04    0.62 
   9 -10   0    3.72    0.78 
   9 -10   0    2.99    0.65 
   9  10   0    3.33    0.66 
  -9 -10   0    3.72    0.74 
  -9  10   0    3.14    0.78 
   9  10   0    2.97    0.64 
   9 -10   0    3.60    0.84 
  -9 -10   0    3.62    0.67 
  -9  10   0    2.93    0.62 
   9  10   0    4.31    0.80 
   9 -10   0    2.75    0.51 
   9  10   0    2.29    0.61 
   9 -10   0    3.31    0.59 
  -9  10   0    3.06    0.70 
  -9  10   0    3.14    0.71 
 -10 -10   0   -0.05    0.32 
 -10  10   0   -0.09    0.39 
  10  10   0   -0.06    0.32 
  10 -10   0   -0.03    0.33 
  10 -10   0    0.06    0.38 
  10 -10   0   -0.16    0.20 
 -10 -10   0    0.07    0.32 
  10 -10   0    0.24    0.33 
 -10  10   0   -0.03    0.47 
 -10  10   0    0.50    0.44 
 -10  10   0    0.00    0.32 
  10 -10   0    0.44    0.40 
  10  10   0   -0.52    0.26 
  10  10   0    0.24    0.39 
  10  10   0   -0.26    0.30 
  11  10   0   -0.30    0.24 
  11 -10   0    0.10    0.48 
  11  10   0    0.31    0.41 
 -11 -10   0    0.23    0.46 
 -11  10   0   -0.13    0.32 
  11  10   0    0.26    0.42 
  11 -10   0   -0.14    0.23 
 -11 -10   0   -0.39    0.27 
 -11  10   0   -0.19    0.30 
  11 -10   0    0.15    0.31 
  11 -10   0    0.00    0.34 
  11  10   0    0.05    0.44 
  11 -10   0   -0.04    0.37 
 -11  10   0    0.01    0.43 
 -11  10   0   -0.07    0.39 
  12 -10   0    9.16    1.03 
  12 -10   0    7.52    1.16 
  12  10   0    8.04    1.25 
  12  10   0    7.60    1.15 
 -12  10   0    8.42    1.30 
  12  10   0    8.34    1.21 
 -12  10   0    8.54    1.25 
 -12  10   0    6.16    0.93 
  12 -10   0    8.21    1.30 
 -12  10   0    7.35    1.17 
 -12 -10   0    9.73    1.31 
  12 -10   0    7.41    0.83 
   0  11   0    0.53    0.26 
   0 -11   0    0.08    0.20 
   0 -11   0   -0.10    0.16 
   0 -11   0    0.00    0.19 
   0 -11   0    0.14    0.21 
   0  11   0   -0.23    0.20 
   0  11   0   -0.01    0.11 
   0  11   0    0.04    0.24 
   0 -11   0    0.12    0.19 
   0 -11   0   -0.07    0.19 
  -1  11   0    8.60    0.98 
   1 -11   0    7.08    0.74 
   1 -11   0    8.66    0.80 
   1 -11   0    8.35    0.61 
   1  11   0    7.98    0.47 
   1 -11   0    9.32    0.75 
   1  11   0    8.89    1.00 
  -1 -11   0    8.00    0.64 
  -1  11   0    8.31    0.82 
  -1  11   0    8.88    0.95 
  -1 -11   0    8.34    0.81 
  -1 -11   0    8.09    0.85 
  -1 -11   0    9.18    0.75 
   1  11   0    8.69    0.85 
  -1 -11   0    7.92    0.78 
  -1  11   0    8.49    0.57 
   1  11   0    8.41    0.90 
   1 -11   0    9.49    0.97 
   1 -11   0    9.48    0.75 
  -1 -11   0    8.38    0.83 
   2 -11   0    4.72    0.63 
   2 -11   0    5.11    0.61 
  -2 -11   0    4.60    0.60 
   2 -11   0    5.92    0.57 
  -2  11   0    5.00    0.54 
  -2  11   0    4.31    0.69 
  -2  11   0    4.65    0.69 
  -2 -11   0    5.49    0.67 
   2  11   0    4.98    0.71 
   2 -11   0    4.37    0.69 
   2  11   0    5.22    0.42 
  -2 -11   0    5.22    0.68 
  -2 -11   0    5.14    0.67 
  -2  11   0    6.20    0.73 
  -2 -11   0    4.82    0.62 
   2  11   0    4.93    0.71 
  -2 -11   0    4.91    0.73 
   2 -11   0    6.06    0.68 
   2  11   0    4.02    0.68 
   2  11   0    3.81    0.59 
   2 -11   0    5.05    0.72 
  -3 -11   0    0.51    0.28 
   3 -11   0    0.07    0.19 
  -3 -11   0    0.36    0.25 
   3 -11   0    0.51    0.31 
  -3  11   0    0.27    0.28 
   3  11   0    0.03    0.21 
   3  11   0    0.12    0.23 
  -3  11   0    0.57    0.30 
  -3  11   0    0.07    0.25 
   3  11   0    0.23    0.27 
   3 -11   0    0.28    0.23 
  -3 -11   0    0.42    0.22 
   3 -11   0    0.43    0.28 
   3  11   0    0.23    0.27 
  -3 -11   0    0.36    0.28 
  -3  11   0    0.21    0.25 
  -3  11   0    0.64    0.24 
   3  11   0    0.16    0.20 
  -3 -11   0    0.15    0.26 
  -3 -11   0   -0.12    0.21 
   3 -11   0    0.73    0.35 
  -4  11   0   77.24    2.96 
   4  11   0   71.53    2.83 
  -4 -11   0   73.48    2.82 
  -4 -11   0   71.08    2.61 
  -4  11   0   72.89    2.93 
  -4 -11   0   72.92    2.85 
  -4 -11   0   71.15    2.73 
  -4 -11   0   73.58    2.97 
   4  11   0   76.88    2.66 
   4 -11   0   72.16    2.79 
  -4  11   0   72.16    2.77 
  -4  11   0   70.74    2.92 
   4  11   0   76.93    3.00 
  -4 -11   0   72.92    2.90 
  -4  11   0   75.74    2.64 
   4  11   0   74.93    2.90 
   4 -11   0   75.90    2.99 
   4 -11   0   72.42    2.67 
   4 -11   0   71.54    2.99 
   4 -11   0   72.39    2.70 
   4  11   0   72.64    2.90 
  -5 -11   0   23.69    1.48 
   5 -11   0   23.40    1.35 
   5  11   0   23.94    1.27 
  -5  11   0   22.57    1.43 
  -5 -11   0   24.03    1.41 
   5  11   0   24.20    1.44 
   5  11   0   24.92    1.41 
   5 -11   0   24.47    1.26 
  -5  11   0   24.79    1.27 
  -5  11   0   24.54    1.34 
  -5 -11   0   25.41    1.39 
  -5  11   0   25.18    1.43 
   5 -11   0   24.45    1.50 
   5 -11   0   25.69    1.53 
   5 -11   0   25.32    1.28 
   5  11   0   25.59    1.47 
  -5  11   0   24.94    1.49 
  -5 -11   0   25.03    1.46 
  -5 -11   0   24.50    1.31 
  -6 -11   0   40.25    1.84 
   6  11   0   40.41    2.01 
   6  11   0   38.57    1.95 
   6 -11   0   39.57    1.75 
   6 -11   0   40.19    1.77 
  -6  11   0   38.37    1.82 
   6 -11   0   40.13    1.98 
  -6  11   0   40.60    2.02 
   6  11   0   40.11    1.85 
   6 -11   0   38.63    2.08 
  -6 -11   0   40.78    1.97 
  -6  11   0   40.08    1.93 
  -6  11   0   40.57    1.83 
   6  11   0   40.49    1.97 
  -6  11   0   40.43    2.09 
   6 -11   0   39.46    2.07 
  -6 -11   0   41.82    2.04 
   7 -11   0   19.06    1.31 
  -7  11   0   18.32    1.38 
  -7 -11   0   20.20    1.31 
  -7  11   0   18.56    1.20 
   7 -11   0   19.23    1.12 
   7 -11   0   20.97    1.45 
   7  11   0   20.23    1.30 
   7  11   0   20.51    1.35 
  -7  11   0   18.87    1.35 
   7 -11   0   17.74    1.40 
  -7 -11   0   19.50    1.35 
   7  11   0   19.33    1.24 
  -7  11   0   19.61    1.24 
  -7 -11   0   19.78    1.22 
   7  11   0   19.22    1.35 
  -7  11   0   21.51    1.27 
  -7  11   0   18.63    1.32 
   7 -11   0   18.83    1.14 
  -8  11   0   22.08    1.36 
  -8 -11   0   22.66    1.46 
  -8  11   0   20.13    1.31 
   8 -11   0   21.75    1.21 
   8  11   0   21.66    1.41 
   8 -11   0   21.31    1.27 
  -8  11   0   22.01    1.59 
   8 -11   0   22.77    1.57 
   8  11   0   22.78    1.51 
   8  11   0   21.51    1.47 
   8 -11   0   19.95    1.54 
  -8 -11   0   21.69    1.35 
  -8 -11   0   22.01    1.49 
  -8  11   0   22.45    1.51 
  -8  11   0   23.94    1.42 
   8 -11   0   21.91    1.46 
  -9  11   0    8.48    1.07 
   9 -11   0    8.90    0.89 
   9  11   0    9.21    1.18 
  -9 -11   0    8.84    1.13 
  -9  11   0    7.42    0.94 
   9 -11   0    7.73    1.21 
   9 -11   0    8.04    1.11 
  -9 -11   0    8.06    1.07 
   9 -11   0    8.62    1.18 
   9 -11   0    8.07    0.93 
   9  11   0    9.35    1.11 
   9  11   0    9.90    1.22 
  -9  11   0    9.98    1.33 
  -9  11   0    8.94    1.18 
  10  11   0   19.78    1.49 
  10 -11   0   21.71    1.62 
 -10  11   0   19.66    1.37 
  10 -11   0   19.48    1.17 
 -10 -11   0   20.21    1.54 
 -10 -11   0   19.27    1.45 
  10 -11   0   20.60    2.05 
 -10  11   0   19.41    1.45 
 -10  11   0   20.37    2.04 
  10 -11   0   19.71    1.28 
  10 -11   0   20.84    1.51 
  10  11   0   18.97    1.50 
 -10  11   0   20.58    1.52 
  10  11   0   19.65    1.45 
  11 -11   0    5.58    1.02 
  11 -11   0    4.82    0.68 
 -11  11   0    4.78    0.94 
  11 -11   0    5.02    0.92 
 -11  11   0    4.25    0.99 
  11 -11   0    4.81    1.06 
  11  11   0    3.63    0.86 
 -11  11   0    4.60    0.83 
  11  11   0    3.97    0.86 
  11 -11   0    4.50    0.75 
 -11 -11   0    4.94    0.98 
 -11  11   0    3.23    0.77 
  11  11   0    5.64    0.97 
  12 -11   0    1.74    0.57 
  12 -11   0    2.22    0.70 
  12  11   0    2.77    0.70 
 -12  11   0    3.58    0.86 
 -12  11   0    1.69    0.63 
 -12  11   0    3.64    0.99 
 -12 -11   0    3.16    0.81 
 -12  11   0    3.56    1.03 
  12  11   0    3.05    0.84 
   0 -12   0   -0.17    0.21 
   0  12   0   -0.32    0.16 
   0 -12   0    0.33    0.24 
   0 -12   0   -0.28    0.22 
   0  12   0   -0.14    0.20 
   0 -12   0    0.31    0.25 
   0  12   0   -0.09    0.23 
   0 -12   0   -0.01    0.16 
   0 -12   0   -0.05    0.20 
   1 -12   0   80.81    3.11 
  -1 -12   0   81.36    3.00 
  -1 -12   0   87.65    3.03 
   1 -12   0   87.79    3.25 
   1 -12   0   80.94    3.00 
   1  12   0   77.79    3.13 
   1  12   0   83.62    3.09 
  -1  12   0   83.54    3.22 
  -1 -12   0   79.20    3.07 
   1 -12   0   80.99    3.09 
  -1 -12   0   80.58    3.08 
  -1 -12   0   83.92    3.05 
  -1 -12   0   85.21    3.19 
   1  12   0   88.86    3.39 
  -1  12   0   84.75    3.33 
  -1  12   0   84.14    3.07 
   1 -12   0   83.87    2.91 
   1 -12   0   82.64    2.98 
  -2 -12   0   13.09    0.96 
   2 -12   0   13.69    1.03 
   2 -12   0   13.39    0.92 
   2  12   0   10.81    1.14 
  -2 -12   0   13.95    0.92 
  -2 -12   0   13.79    1.04 
   2 -12   0   14.19    0.90 
   2  12   0   13.31    1.00 
   2 -12   0   14.40    0.80 
   2 -12   0   13.05    1.00 
  -2 -12   0   13.53    0.94 
  -2  12   0   12.49    1.02 
  -2 -12   0   12.91    0.93 
   2  12   0   13.94    0.98 
   2 -12   0   13.26    0.93 
  -2  12   0   13.86    1.05 
  -2 -12   0   13.78    0.90 
  -2  12   0   12.31    0.92 
  -2  12   0   14.11    0.80 
   3 -12   0   36.58    1.71 
  -3  12   0   38.59    1.91 
   3  12   0   37.90    1.94 
  -3 -12   0   37.17    1.87 
  -3 -12   0   34.56    1.63 
  -3  12   0   34.28    1.79 
   3 -12   0   35.94    1.89 
  -3  12   0   37.83    1.57 
  -3  12   0   36.55    1.74 
   3 -12   0   38.45    1.88 
  -3 -12   0   37.55    1.68 
  -3 -12   0   38.88    1.81 
  -3 -12   0   37.71    1.81 
   3 -12   0   35.23    1.69 
  -3 -12   0   36.28    1.73 
   3 -12   0   35.85    1.63 
  -3  12   0   34.66    1.86 
   3  12   0   40.10    1.89 
   3  12   0   37.63    1.82 
  -4 -12   0   16.92    1.13 
  -4 -12   0   16.65    1.16 
  -4  12   0   18.98    1.26 
  -4  12   0   17.13    1.12 
  -4 -12   0   19.46    1.04 
   4  12   0   17.72    1.24 
  -4 -12   0   19.71    1.32 
  -4  12   0   17.82    1.00 
   4 -12   0   18.16    1.10 
   4  12   0   17.54    1.21 
   4 -12   0   16.12    1.08 
  -4 -12   0   18.14    1.10 
   4 -12   0   18.10    1.25 
  -4  12   0   17.36    1.22 
  -4  12   0   17.85    1.23 
   4  12   0   17.31    1.24 
   4  12   0   19.71    1.03 
  -4 -12   0   18.65    1.22 
   4 -12   0   18.73    1.07 
   4 -12   0   18.00    1.29 
  -5 -12   0   59.78    2.53 
   5 -12   0   55.40    2.64 
   5 -12   0   59.05    2.34 
   5  12   0   61.75    2.65 
  -5  12   0   59.83    2.32 
   5 -12   0   56.77    2.32 
   5 -12   0   59.20    2.67 
   5 -12   0   58.25    2.33 
  -5 -12   0   58.53    2.40 
  -5  12   0   57.91    2.62 
  -5  12   0   57.71    2.43 
   5  12   0   57.28    2.30 
   5 -12   0   57.86    2.47 
  -5  12   0   57.37    2.56 
  -5 -12   0   57.24    2.55 
  -5 -12   0   61.30    2.69 
  -5  12   0   57.76    2.61 
   5  12   0   53.88    2.52 
  -6  12   0   -0.31    0.19 
  -6  12   0    0.18    0.28 
   6  12   0    0.12    0.25 
   6  12   0   -0.35    0.26 
   6 -12   0    0.15    0.26 
  -6  12   0   -0.03    0.24 
   6 -12   0    0.12    0.33 
   6  12   0    0.28    0.27 
  -6 -12   0    0.38    0.37 
  -6  12   0    0.03    0.31 
   6 -12   0   -0.07    0.27 
  -6 -12   0   -0.23    0.23 
   6 -12   0   -0.06    0.21 
  -6 -12   0   -0.04    0.25 
  -6  12   0    0.13    0.28 
   7  12   0    0.38    0.32 
   7 -12   0    0.63    0.39 
  -7 -12   0    0.41    0.29 
   7 -12   0    0.74    0.44 
  -7  12   0    0.28    0.39 
  -7  12   0    0.11    0.35 
   7  12   0    0.72    0.38 
   7 -12   0    0.43    0.29 
  -7  12   0    0.30    0.31 
   7 -12   0    0.51    0.29 
  -7 -12   0    0.73    0.41 
   7 -12   0    0.23    0.36 
  -7 -12   0   -0.10    0.31 
   7  12   0    0.19    0.34 
  -7  12   0    0.34    0.31 
   8 -12   0    0.12    0.25 
   8  12   0    0.16    0.30 
  -8  12   0    0.18    0.43 
  -8  12   0    0.61    0.39 
   8 -12   0    0.13    0.41 
  -8  12   0    0.07    0.27 
   8 -12   0    0.04    0.35 
  -8 -12   0   -0.30    0.28 
  -8  12   0    0.08    0.26 
   8  12   0   -0.28    0.25 
  -8 -12   0    0.37    0.40 
   8 -12   0   -0.09    0.32 
   8 -12   0    0.26    0.34 
  -8  12   0   -0.09    0.35 
  -9  12   0    0.35    0.40 
   9 -12   0   -0.17    0.30 
   9 -12   0    0.18    0.27 
  -9  12   0    0.12    0.34 
  -9  12   0    0.11    0.38 
   9  12   0    0.02    0.33 
   9 -12   0    0.74    0.50 
  -9 -12   0    0.47    0.41 
  -9 -12   0   -0.03    0.36 
   9  12   0    0.30    0.37 
   9 -12   0    0.46    0.53 
   9 -12   0    0.07    0.32 
  -9  12   0   -0.15    0.41 
  -9  12   0   -0.40    0.34 
 -10  12   0    0.19    0.36 
  10 -12   0   -0.03    0.29 
  10  12   0    0.16    0.32 
  10 -12   0    0.19    0.41 
 -10  12   0    0.16    0.38 
 -10  12   0    0.27    0.41 
  10  12   0   -0.08    0.28 
 -10  12   0    0.69    0.61 
 -10  12   0   -0.12    0.33 
 -10 -12   0    0.20    0.38 
  10 -12   0    0.27    0.28 
  10 -12   0    1.30    0.67 
  10 -12   0   -0.28    0.27 
  11 -12   0    0.46    0.43 
  11  12   0    0.38    0.42 
 -11  12   0    1.03    0.57 
 -11  12   0    1.45    0.60 
  11 -12   0    1.42    0.53 
  11 -12   0    0.48    0.31 
 -11 -12   0    1.12    0.54 
 -11  12   0    0.79    0.47 
  11  12   0    0.72    0.46 
  11 -12   0    1.18    0.56 
 -11  12   0    0.12    0.45 
  11 -12   0    1.22    0.41 
   0 -13   0    0.16    0.30 
   0 -13   0   -0.18    0.20 
   0  13   0    0.18    0.29 
   0 -13   0   -0.22    0.19 
   0 -13   0    0.25    0.27 
   0  13   0    0.16    0.30 
   0 -13   0    0.48    0.31 
   0  13   0   -0.09    0.22 
   0 -13   0    0.25    0.22 
  -1 -13   0    1.68    0.48 
   1 -13   0    2.00    0.46 
   1  13   0    1.57    0.45 
   1 -13   0    1.72    0.40 
  -1 -13   0    1.93    0.45 
  -1  13   0    2.82    0.62 
  -1 -13   0    2.21    0.50 
   1 -13   0    2.08    0.53 
  -1 -13   0    1.89    0.44 
   1 -13   0    1.56    0.40 
  -1 -13   0    1.82    0.45 
   1  13   0    2.07    0.50 
   1  13   0    1.69    0.56 
  -1  13   0    2.09    0.57 
  -1 -13   0    2.00    0.51 
   1 -13   0    2.73    0.60 
  -1  13   0    2.30    0.52 
   1 -13   0    1.87    0.51 
   2  13   0   34.64    1.83 
  -2 -13   0   36.72    1.88 
  -2 -13   0   37.73    1.81 
  -2 -13   0   36.63    1.76 
   2 -13   0   37.99    1.76 
  -2  13   0   36.21    1.94 
   2 -13   0   38.15    1.72 
   2 -13   0   35.46    1.85 
   2  13   0   39.30    1.86 
  -2 -13   0   36.54    1.74 
  -2 -13   0   37.42    1.72 
   2  13   0   33.78    1.92 
  -2 -13   0   36.07    1.78 
  -2  13   0   38.49    1.94 
  -2  13   0   38.43    1.81 
   2 -13   0   37.78    1.93 
   2 -13   0   38.91    1.81 
   3  13   0   -0.11    0.23 
   3 -13   0   -0.16    0.15 
   3  13   0    0.26    0.28 
  -3 -13   0   -0.14    0.20 
  -3  13   0    0.25    0.32 
   3 -13   0    0.37    0.32 
  -3 -13   0   -0.02    0.25 
   3 -13   0    0.17    0.25 
   3  13   0    0.06    0.30 
  -3 -13   0    0.13    0.22 
  -3  13   0   -0.10    0.25 
   3 -13   0   -0.05    0.27 
  -3 -13   0    0.09    0.28 
  -3 -13   0    0.12    0.32 
   3 -13   0    0.20    0.25 
  -3 -13   0    0.27    0.31 
  -3  13   0    0.12    0.26 
  -3  13   0    0.12    0.25 
  -4 -13   0    0.76    0.36 
  -4  13   0    0.52    0.34 
  -4  13   0    0.21    0.39 
  -4 -13   0    0.74    0.35 
  -4 -13   0    1.23    0.53 
   4 -13   0    0.56    0.28 
  -4 -13   0    0.53    0.29 
   4 -13   0    0.81    0.34 
   4 -13   0    0.51    0.31 
   4  13   0    0.58    0.33 
  -4 -13   0    0.30    0.25 
  -4  13   0    1.13    0.40 
  -4 -13   0    0.18    0.27 
   4 -13   0    0.85    0.37 
   4  13   0    0.12    0.34 
   4 -13   0    0.42    0.38 
  -4  13   0    0.07    0.32 
  -5  13   0   14.40    1.45 
  -5 -13   0   14.06    1.36 
  -5  13   0   15.64    1.19 
   5 -13   0   15.64    1.12 
  -5  13   0   13.63    1.07 
  -5 -13   0   15.80    1.15 
  -5  13   0   14.79    1.18 
   5 -13   0   11.42    1.31 
   5 -13   0   13.73    0.98 
  -5 -13   0   13.05    0.99 
  -5  13   0   14.72    1.01 
   5 -13   0   14.66    1.01 
   5 -13   0   14.95    1.01 
   5 -13   0   13.46    1.45 
  -5 -13   0   15.81    1.27 
   5  13   0   15.52    1.24 
   5  13   0   14.01    1.38 
  -6  13   0   24.78    1.50 
   6 -13   0   25.05    1.40 
   6 -13   0   26.51    1.43 
   6  13   0   28.58    1.70 
   6 -13   0   25.18    1.71 
   6  13   0   27.29    1.66 
   6 -13   0   23.86    1.67 
  -6  13   0   22.70    1.60 
  -6 -13   0   24.82    1.45 
  -6 -13   0   26.52    1.60 
  -6  13   0   27.91    1.62 
   6 -13   0   25.65    1.55 
  -6  13   0   26.41    1.42 
  -6 -13   0   27.48    1.66 
   6  13   0   25.95    1.42 
  -6  13   0   28.24    1.77 
   7  13   0   17.14    1.35 
  -7  13   0   16.16    1.64 
  -7  13   0   19.38    1.23 
   7  13   0   18.61    1.36 
  -7 -13   0   18.20    1.38 
  -7  13   0   17.02    1.68 
  -7 -13   0   17.45    1.31 
   7 -13   0   18.32    1.47 
   7  13   0   19.06    1.24 
   7 -13   0   18.25    1.19 
  -7  13   0   18.11    1.28 
   7 -13   0   14.24    1.54 
   7 -13   0   18.87    1.16 
   8 -13   0   11.66    1.40 
   8 -13   0    9.62    1.36 
   8 -13   0    9.73    1.27 
  -8 -13   0   10.36    1.26 
   8  13   0    9.97    1.13 
   8 -13   0    9.87    1.06 
  -8  13   0    8.13    1.18 
  -8  13   0    9.37    1.12 
  -8  13   0   10.05    1.39 
  -8  13   0    9.52    1.11 
   8 -13   0    8.18    0.90 
   8  13   0    9.37    1.25 
  -8 -13   0   12.01    1.36 
   9  13   0    3.00    0.70 
   9 -13   0    2.76    0.55 
  -9  13   0    3.43    0.86 
  -9 -13   0    2.46    0.69 
  -9  13   0    2.41    0.62 
   9 -13   0    2.83    0.72 
   9 -13   0    2.67    0.89 
  -9  13   0    3.29    0.71 
   9  13   0    2.26    0.64 
   9 -13   0    3.26    0.80 
  -9  13   0    4.37    0.87 
   9 -13   0    2.48    0.61 
  10 -13   0    3.21    0.99 
  10 -13   0    4.36    0.71 
  10 -13   0    5.18    0.99 
  10 -13   0    3.50    0.79 
 -10  13   0    3.75    0.99 
 -10  13   0    6.33    1.08 
  10 -13   0    5.13    0.71 
 -10  13   0    4.03    0.79 
 -10 -13   0    3.30    0.80 
 -10  13   0    4.64    0.85 
 -10  13   0    4.53    0.87 
  10  13   0    5.05    0.97 
  10  13   0    3.68    0.77 
  11 -13   0    5.63    1.05 
 -11 -13   0    7.64    1.24 
  11  13   0    6.91    1.10 
 -11  13   0    8.22    1.18 
  11 -13   0    8.06    1.27 
   0  14   0   93.97    3.52 
   0  14   0   92.61    3.77 
   0 -14   0   94.82    3.43 
   0 -14   0   91.95    3.37 
   0  14   0   89.43    3.61 
   0 -14   0   95.72    3.60 
   0 -14   0   92.39    3.57 
   0 -14   0   93.62    3.42 
   0 -14   0   92.50    3.54 
  -1  14   0    5.36    0.86 
   1  14   0    5.64    0.81 
  -1  14   0    4.71    0.85 
   1 -14   0    5.25    0.74 
  -1  14   0    4.72    0.75 
  -1 -14   0    4.60    0.76 
   1 -14   0    4.99    0.66 
  -1 -14   0    4.13    0.72 
   1  14   0    4.28    0.74 
  -1 -14   0    4.37    0.68 
  -1 -14   0    3.97    0.63 
   1 -14   0    5.01    0.71 
   1 -14   0    3.95    0.72 
  -1 -14   0    4.95    0.76 
  -1 -14   0    6.19    0.78 
   1  14   0    4.04    0.80 
   1 -14   0    4.67    0.74 
   1 -14   0    4.75    0.76 
  -2 -14   0   15.95    1.08 
   2  14   0   14.40    1.12 
  -2  14   0   13.12    1.34 
   2 -14   0   14.67    1.16 
  -2  14   0   14.83    1.08 
   2 -14   0   13.92    1.00 
  -2 -14   0   15.38    1.07 
   2  14   0   11.46    1.30 
  -2 -14   0   11.93    1.25 
   2 -14   0   14.64    1.02 
  -2 -14   0   14.41    1.09 
  -2 -14   0   16.90    1.13 
   2  14   0   14.28    1.12 
  -2  14   0   13.71    1.40 
   2 -14   0   16.18    1.13 
   2 -14   0   14.20    1.12 
  -2 -14   0   14.68    1.01 
   3 -14   0    1.21    0.42 
   3 -14   0    1.17    0.48 
  -3  14   0    0.86    0.44 
   3 -14   0    0.62    0.32 
  -3  14   0    1.43    0.45 
   3 -14   0    0.71    0.33 
  -3 -14   0    0.88    0.45 
   3 -14   0    0.77    0.42 
  -3 -14   0    0.99    0.41 
  -3 -14   0    1.03    0.40 
  -3  14   0    0.43    0.35 
  -3 -14   0    1.57    0.48 
  -3 -14   0    1.47    0.43 
  -3  14   0    0.63    0.40 
   3  14   0    1.80    0.52 
   3  14   0    1.21    0.44 
  -3 -14   0    1.44    0.43 
   3  14   0    0.48    0.42 
   4 -14   0    4.03    0.63 
  -4  14   0    3.17    0.67 
   4 -14   0    4.76    0.87 
   4 -14   0    4.30    0.70 
   4  14   0    3.69    0.78 
   4 -14   0    3.76    0.65 
   4 -14   0    4.36    0.83 
  -4 -14   0    3.56    0.70 
  -4  14   0    4.44    0.86 
  -4  14   0    5.27    0.82 
  -4 -14   0    3.39    0.66 
   4  14   0    4.00    0.76 
  -4 -14   0    4.47    0.86 
  -4 -14   0    4.19    0.67 
  -4  14   0    4.60    0.84 
  -4 -14   0    3.82    0.71 
   5 -14   0    0.71    0.44 
  -5  14   0    0.37    0.37 
  -5  14   0    0.37    0.37 
   5 -14   0    0.82    0.37 
  -5 -14   0    0.92    0.52 
   5 -14   0    0.39    0.34 
  -5  14   0    0.82    0.45 
  -5 -14   0    0.65    0.42 
  -5  14   0    0.35    0.38 
  -5 -14   0    0.49    0.32 
   5 -14   0    0.74    0.38 
   5 -14   0    0.50    0.41 
   5  14   0    0.41    0.37 
   5 -14   0    0.72    0.35 
   5  14   0    0.95    0.42 
  -5 -14   0    0.25    0.34 
  -6 -14   0    4.20    0.82 
  -6  14   0    2.93    0.71 
   6 -14   0    3.04    0.76 
  -6  14   0    3.77    0.75 
   6  14   0    3.98    0.80 
   6 -14   0    3.84    0.66 
   6 -14   0    2.89    0.64 
   6 -14   0    4.11    0.86 
   6 -14   0    2.58    0.56 
  -6  14   0    4.41    0.82 
   6  14   0    4.37    0.82 
  -6 -14   0    3.95    0.75 
  -6  14   0    3.38    0.75 
   7 -14   0    0.25    0.33 
   7  14   0   -0.04    0.29 
  -7 -14   0    0.18    0.37 
  -7  14   0    0.68    0.45 
   7 -14   0   -0.27    0.22 
  -7 -14   0   -0.06    0.30 
  -7  14   0    0.13    0.36 
   7 -14   0    0.35    0.44 
   7 -14   0    0.44    0.40 
  -7  14   0    0.14    0.35 
   7  14   0   -0.14    0.19 
  -8  14   0    0.20    0.47 
   8 -14   0   -0.01    0.32 
   8 -14   0    0.21    0.29 
   8 -14   0   -0.16    0.45 
  -8 -14   0    0.46    0.44 
  -8  14   0    0.60    0.44 
   8  14   0    0.14    0.33 
  -8  14   0    0.68    0.47 
  -8 -14   0    0.82    0.46 
   8 -14   0   -0.16    0.46 
   9  14   0    0.06    0.36 
   9 -14   0   -0.06    0.42 
  -9 -14   0    0.13    0.38 
  -9  14   0    0.18    0.37 
  -9  14   0    0.01    0.38 
   9 -14   0   -0.01    0.26 
   9  14   0    4.06    0.91 
  -9  14   0    0.10    0.52 
   9 -14   0   -0.24    0.33 
   9 -14   0   -0.09    0.27 
  10  14   0    2.39    0.66 
 -10 -14   0    4.45    0.96 
 -10  14   0    4.03    0.80 
  10 -14   0    3.25    0.61 
 -10  14   0    2.88    0.82 
  10  14   0    2.37    0.65 
  10 -14   0    3.00    0.61 
  10 -14   0    3.79    0.90 
 -10  14   0    3.09    0.82 
  10 -14   0    2.77    0.80 
  10 -14   0    3.14    0.84 
   0 -15   0   -0.07    0.21 
   0 -15   0   -0.19    0.23 
   0  15   0   -0.33    0.29 
   0 -15   0    0.02    0.28 
   0 -15   0   -0.21    0.21 
   0 -15   0   -0.07    0.32 
   0  15   0   -0.18    0.25 
   0  15   0   -0.05    0.28 
   0 -15   0    0.00    0.23 
   1  15   0    7.73    1.05 
  -1 -15   0    5.78    0.85 
   1  15   0    7.37    1.11 
  -1  15   0    7.45    1.03 
  -1 -15   0    7.01    0.91 
   1 -15   0    8.09    1.04 
   1  15   0    8.26    1.02 
   1 -15   0    8.92    0.99 
   1 -15   0    6.31    0.88 
  -1 -15   0    6.95    0.84 
  -1  15   0    7.83    1.01 
   1 -15   0    7.20    0.89 
  -1 -15   0    7.14    1.01 
  -1 -15   0    6.71    0.93 
  -1  15   0    6.08    1.01 
  -1 -15   0    7.22    0.89 
   1 -15   0    9.02    1.09 
   2 -15   0    1.86    0.50 
  -2  15   0    1.94    0.56 
  -2 -15   0    1.66    0.53 
  -2 -15   0    1.27    0.44 
   2 -15   0    1.58    0.46 
   2 -15   0    0.83    0.42 
   2 -15   0    1.64    0.49 
   2  15   0    0.92    0.52 
   2 -15   0    0.85    0.42 
  -2 -15   0    1.08    0.38 
   2  15   0    1.12    0.47 
  -2 -15   0    1.72    0.57 
  -2  15   0    1.07    0.50 
   2  15   0    1.84    0.57 
  -2 -15   0    1.12    0.39 
  -2  15   0    1.64    0.52 
  -2  15   0    1.18    0.50 
  -2 -15   0    1.46    0.50 
   3 -15   0    9.96    1.20 
   3 -15   0   10.79    1.13 
  -3 -15   0   12.21    1.25 
   3 -15   0   10.46    1.10 
  -3 -15   0   11.30    1.21 
  -3  15   0   10.93    1.27 
   3  15   0   10.81    1.26 
  -3 -15   0   11.44    1.33 
   3 -15   0   10.35    1.06 
  -3 -15   0   10.67    1.16 
   3  15   0    9.70    1.24 
  -3  15   0    8.26    1.05 
  -3 -15   0    8.19    0.93 
  -3  15   0    9.82    1.07 
   3 -15   0   10.07    1.21 
  -3 -15   0   10.59    1.09 
  -3  15   0    9.28    1.18 
   4  15   0   -0.12    0.36 
  -4 -15   0   -0.35    0.25 
   4 -15   0    1.07    0.34 
   4 -15   0    0.35    0.43 
  -4 -15   0    0.04    0.25 
  -4  15   0    0.30    0.32 
  -4 -15   0    0.24    0.29 
  -4  15   0   -0.09    0.29 
   4 -15   0    0.26    0.32 
   4 -15   0    0.54    0.27 
  -4  15   0    0.00    0.27 
   4  15   0   -0.21    0.26 
   4 -15   0    0.01    0.34 
  -4  15   0    0.24    0.36 
  -4 -15   0   -0.36    0.33 
   5 -15   0   15.92    1.61 
  -5  15   0   14.33    1.54 
  -5 -15   0   15.24    1.23 
  -5  15   0   17.25    1.35 
   5 -15   0   15.96    1.15 
   5 -15   0   15.61    1.64 
  -5  15   0   15.78    1.59 
   5 -15   0   16.94    1.18 
   5  15   0   15.35    1.54 
   5  15   0   15.20    1.58 
  -5 -15   0   19.35    1.39 
   5 -15   0   17.62    1.19 
  -5  15   0   16.94    1.28 
   5 -15   0   17.39    1.26 
  -6 -15   0    4.48    0.83 
  -6  15   0    6.88    1.14 
  -6 -15   0    5.56    0.92 
   6 -15   0    4.21    0.88 
   6  15   0    4.29    0.83 
   6 -15   0    5.27    0.99 
   6  15   0    5.56    0.96 
  -6  15   0    6.35    0.98 
   6 -15   0    5.09    0.79 
   6 -15   0    6.12    0.83 
  -6  15   0    5.83    1.03 
  -6  15   0    5.96    0.96 
   7 -15   0   14.31    1.09 
  -7 -15   0   14.99    1.57 
   7 -15   0   14.83    1.65 
  -7  15   0   14.15    1.60 
   7  15   0   15.61    1.58 
  -7  15   0   15.24    1.52 
  -7 -15   0   15.02    1.57 
   7  15   0   14.09    1.55 
   7 -15   0   14.71    1.13 
   7 -15   0   15.68    1.75 
  -7  15   0   14.97    1.68 
   8  15   0    4.43    0.95 
  -8  15   0    2.17    0.82 
   8 -15   0    3.06    0.62 
   8 -15   0    3.80    0.90 
   8 -15   0    2.12    0.85 
  -8 -15   0    2.52    0.69 
   8 -15   0    3.29    0.66 
  -8  15   0    3.47    0.80 
  -8  15   0    2.64    0.70 
   9 -15   0   18.88    2.06 
  -9 -15   0   16.40    1.77 
   9  15   0   16.79    1.80 
  -9  15   0   19.62    2.08 
   9 -15   0   16.95    1.89 
   9 -15   0   17.38    1.27 
   9 -15   0   15.22    1.13 
  -9  15   0   19.02    1.95 
  -9  15   0   18.78    1.49 
   0 -16   0    2.47    0.58 
   0 -16   0    1.63    0.51 
   0  16   0    2.49    0.63 
   0 -16   0    3.12    0.70 
   0 -16   0    3.17    0.69 
   0 -16   0    2.39    0.55 
   0  16   0    2.24    0.60 
   0  16   0    2.71    0.72 
   0 -16   0    2.18    0.55 
   1  16   0   34.22    1.99 
   1  16   0   34.35    2.16 
  -1 -16   0   38.69    1.98 
  -1 -16   0   37.18    1.98 
  -1  16   0   34.89    2.15 
   1 -16   0   36.36    2.04 
   1 -16   0   36.39    1.98 
  -1 -16   0   36.69    2.04 
   1 -16   0   36.45    2.01 
  -1 -16   0   39.54    1.93 
   1 -16   0   38.99    1.92 
  -1  16   0   37.03    1.98 
  -1  16   0   37.00    2.08 
  -1 -16   0   39.03    1.94 
   1  16   0   36.64    1.99 
  -1 -16   0   37.81    1.87 
   1 -16   0   35.07    1.84 
   2  16   0    0.85    0.45 
   2  16   0    1.18    0.55 
   2 -16   0    1.07    0.41 
   2 -16   0    0.70    0.41 
  -2  16   0    0.51    0.41 
  -2 -16   0    0.35    0.34 
  -2 -16   0   -0.03    0.30 
  -2 -16   0    0.55    0.33 
  -2  16   0    0.67    0.38 
   2 -16   0    0.97    0.44 
   2 -16   0    0.47    0.33 
   2 -16   0    0.19    0.31 
  -2 -16   0    0.49    0.35 
  -2 -16   0    0.41    0.33 
  -2  16   0    0.47    0.38 
  -2 -16   0    0.46    0.40 
  -2  16   0    0.69    0.40 
  -3 -16   0   15.77    1.20 
  -3 -16   0   14.74    1.08 
   3  16   0   13.59    1.55 
   3 -16   0   10.89    1.33 
  -3 -16   0   14.55    1.42 
  -3  16   0   14.52    1.54 
   3 -16   0   14.95    1.11 
  -3  16   0   14.15    1.53 
  -3  16   0   14.10    1.50 
  -3  16   0   13.32    1.37 
  -3 -16   0   14.44    1.51 
  -3 -16   0   10.96    1.18 
   3 -16   0   13.95    1.13 
   3  16   0   13.06    1.45 
   3 -16   0   12.88    1.45 
   3 -16   0   14.00    1.10 
   4  16   0    3.59    0.82 
  -4 -16   0    3.62    0.74 
  -4  16   0    3.87    0.81 
  -4 -16   0    4.03    0.79 
  -4 -16   0    4.73    0.98 
  -4  16   0    3.94    0.79 
   4  16   0    4.34    0.82 
  -4  16   0    3.83    0.82 
   4 -16   0    3.77    0.67 
   4 -16   0    3.60    0.71 
   4 -16   0    2.91    0.71 
  -4  16   0    4.85    0.90 
   4 -16   0    4.38    0.91 
   4 -16   0    3.18    0.66 
   5 -16   0   12.66    1.05 
   5 -16   0   11.47    1.46 
   5 -16   0   13.99    1.55 
  -5 -16   0   12.40    1.40 
   5  16   0   11.80    1.38 
   5 -16   0   12.40    1.32 
  -5  16   0   13.76    1.50 
  -5  16   0   10.82    1.24 
  -5  16   0   11.98    1.43 
  -5 -16   0   12.69    1.38 
   5 -16   0   11.17    1.17 
  -5  16   0   11.52    1.43 
   5 -16   0   11.54    1.20 
   5  16   0   14.33    1.59 
  -6  16   0    0.69    0.47 
  -6  16   0    0.71    0.50 
  -6  16   0    0.89    0.56 
  -6 -16   0    1.96    0.61 
  -6  16   0    0.95    0.50 
   6  16   0    0.97    0.50 
   6 -16   0    0.58    0.42 
   6 -16   0    0.77    0.43 
  -6 -16   0    0.29    0.39 
   6 -16   0    0.99    0.47 
   6 -16   0    0.32    0.53 
   6  16   0    0.92    0.44 
   7 -16   0    3.19    0.70 
  -7  16   0    2.62    0.78 
   7 -16   0    2.81    0.87 
   7  16   0    2.66    0.69 
   7 -16   0    3.31    0.67 
  -7  16   0    2.88    0.77 
   7 -16   0    3.02    0.79 
  -7  16   0    3.89    0.86 
  -7 -16   0    3.46    0.81 
   7  16   0    2.64    0.78 
   8 -16   0    4.00    0.69 
  -8  16   0    2.56    0.76 
   8 -16   0    4.61    0.95 
  -8  16   0    2.93    0.74 
   8  16   0    2.91    0.74 
  -8 -16   0    2.51    0.69 
  -8  16   0    2.70    0.85 
   8 -16   0    2.82    0.84 
   8 -16   0    3.84    0.74 
   0 -17   0    0.52    0.41 
   0  17   0   -0.35    0.43 
   0  17   0    0.35    0.40 
   0  17   0   -0.01    0.37 
   0 -17   0   -0.16    0.28 
   0 -17   0    0.40    0.41 
   0 -17   0    0.39    0.30 
   0 -17   0   -0.07    0.30 
  -1  17   0   -0.18    0.31 
   1 -17   0   -0.01    0.34 
  -1 -17   0    0.26    0.36 
  -1  17   0    0.29    0.36 
   1  17   0   -0.33    0.41 
   1 -17   0   -0.35    0.30 
  -1  17   0   -0.51    0.37 
  -1 -17   0   -0.35    0.20 
   1 -17   0    0.59    0.40 
   1 -17   0   -0.11    0.26 
  -1 -17   0   -0.04    0.31 
   1  17   0   -0.01    0.28 
  -1 -17   0   -0.07    0.35 
   1 -17   0   -0.03    0.21 
  -1 -17   0    0.33    0.35 
  -1 -17   0    0.55    0.40 
  -2 -17   0    3.14    0.75 
   2 -17   0    3.82    0.85 
   2 -17   0    2.71    0.65 
   2 -17   0    3.51    0.76 
  -2 -17   0    3.85    0.74 
  -2  17   0    4.01    0.78 
   2  17   0    2.40    0.84 
  -2 -17   0    2.49    0.59 
   2  17   0    2.69    0.72 
  -2  17   0    1.49    0.58 
  -2  17   0    3.84    0.77 
   2 -17   0    3.01    0.66 
  -2 -17   0    2.80    0.69 
  -2  17   0    3.29    0.80 
   2 -17   0    2.21    0.64 
  -2 -17   0    4.24    0.80 
  -2 -17   0    3.46    0.72 
  -3  17   0    3.99    0.80 
   3  17   0    2.22    0.65 
  -3 -17   0    3.46    0.78 
  -3 -17   0    1.91    0.57 
  -3 -17   0    3.31    0.85 
   3 -17   0    3.10    0.68 
   3 -17   0    3.12    0.75 
   3 -17   0    2.98    0.64 
   3  17   0    2.72    0.82 
  -3  17   0    3.15    0.76 
   3 -17   0    2.62    0.74 
  -3  17   0    2.56    0.73 
   3 -17   0    2.12    0.57 
  -3 -17   0    2.66    0.68 
  -3  17   0    2.88    0.66 
   4  17   0    2.93    0.77 
  -4 -17   0    3.48    0.77 
  -4  17   0    3.59    0.80 
   4 -17   0    3.76    0.83 
   4 -17   0    3.64    0.74 
  -4 -17   0    3.91    0.77 
   4  17   0    4.67    0.85 
  -4  17   0    4.14    0.80 
   4 -17   0    3.31    0.71 
  -4  17   0    4.44    0.88 
   4 -17   0    2.93    0.69 
  -4 -17   0    4.12    0.93 
  -4  17   0    3.99    0.86 
   4 -17   0    3.46    0.83 
  -5  17   0    0.94    0.50 
   5  17   0    0.08    0.44 
   5 -17   0   -0.08    0.33 
   5 -17   0    0.72    0.48 
  -5  17   0    0.96    0.47 
   5 -17   0    0.71    0.46 
   5  17   0    0.10    0.30 
  -5  17   0    0.11    0.40 
   5 -17   0    0.43    0.39 
  -5 -17   0    0.51    0.38 
  -5  17   0    0.05    0.41 
  -5 -17   0    0.24    0.43 
   5 -17   0   -0.02    0.34 
   5 -17   0   -0.01    0.33 
  -6  17   0   17.61    1.44 
   6  17   0   21.55    2.05 
   6  17   0   15.25    1.65 
   6 -17   0   14.64    1.67 
  -6  17   0   17.38    1.79 
   6 -17   0   17.14    1.26 
   6 -17   0   17.21    1.32 
   6 -17   0   18.21    1.96 
  -6  17   0   14.72    1.70 
  -6  17   0   19.49    1.98 
   7 -17   0    0.47    0.41 
   7 -17   0    0.66    0.39 
  -7  17   0    1.15    0.51 
  -7 -17   0    0.62    0.47 
   7  17   0    0.61    0.41 
  -7  17   0    0.65    0.42 
   7 -17   0    0.02    0.31 
   7 -17   0    0.64    0.51 
   7  17   0    1.02    0.53 
  -7  17   0    0.54    0.54 
   0 -18   0   14.17    1.56 
   0 -18   0   12.75    1.40 
   0  18   0   12.75    1.49 
   0 -18   0   12.54    1.32 
   0 -18   0   14.91    1.42 
   0 -18   0   13.20    1.48 
   0  18   0   12.16    1.36 
   0  18   0   16.45    1.81 
  -1 -18   0   12.83    1.46 
   1 -18   0   16.77    1.67 
   1 -18   0   12.20    1.30 
  -1 -18   0   11.80    1.42 
  -1  18   0    9.87    1.31 
   1  18   0   10.93    1.48 
  -1 -18   0    9.49    1.16 
  -1 -18   0   12.52    1.39 
  -1 -18   0   14.13    1.12 
  -1  18   0   10.36    1.44 
   1 -18   0   13.02    1.42 
  -1  18   0   12.41    1.40 
  -1  18   0   16.23    1.61 
   1  18   0   12.44    1.46 
   1 -18   0   14.45    1.43 
   1 -18   0   15.61    1.61 
  -2 -18   0    3.68    0.71 
   2  18   0    2.80    0.75 
  -2  18   0    3.12    0.87 
  -2 -18   0    2.20    0.61 
   2 -18   0    3.06    0.69 
  -2 -18   0    4.11    0.87 
   2 -18   0    2.99    0.74 
  -2 -18   0    3.46    0.76 
  -2  18   0    3.30    0.75 
   2  18   0    2.63    0.75 
   2 -18   0    2.28    0.64 
  -2  18   0    3.84    0.83 
   2 -18   0    3.76    0.82 
  -2  18   0    3.90    0.82 
   2 -18   0    2.20    0.58 
   3 -18   0    4.98    0.86 
   3  18   0    5.41    1.09 
   3 -18   0    4.33    0.97 
  -3  18   0    4.06    0.86 
   3  18   0    4.66    0.90 
  -3 -18   0    5.06    0.89 
  -3 -18   0    7.24    1.21 
  -3 -18   0    4.66    0.87 
   3 -18   0    5.52    0.92 
   3 -18   0    4.27    0.81 
   3 -18   0    4.43    0.92 
  -3  18   0    5.79    0.99 
  -3  18   0    4.70    1.01 
  -3  18   0    5.11    0.96 
  -4  18   0   26.75    1.89 
   4 -18   0   24.73    1.62 
  -4 -18   0   26.86    1.77 
  -4  18   0   28.52    1.81 
   4  18   0   28.10    1.88 
   4 -18   0   26.35    1.91 
  -4  18   0   23.45    1.78 
   4  18   0   28.20    2.06 
  -4 -18   0   23.94    1.74 
   4 -18   0   25.17    1.67 
  -4  18   0   28.57    2.01 
   4 -18   0   27.00    1.91 
   4 -18   0   26.91    1.68 
   5  18   0    0.92    0.61 
   5 -18   0    0.52    0.41 
   5 -18   0    0.19    0.50 
  -5 -18   0    0.64    0.50 
  -5  18   0    0.29    0.51 
  -5  18   0    0.42    0.42 
   5 -18   0    0.43    0.43 
  -5  18   0   -0.04    0.36 
   5 -18   0   -0.09    0.38 
   5 -18   0    0.27    0.39 
  -5  18   0    0.52    0.48 
   5  18   0    1.10    0.50 
   5 -18   0    0.49    0.43 
   6  18   0    2.35    0.74 
   6  18   0    4.17    0.90 
  -6  18   0    4.46    0.93 
  -6 -18   0    2.98    0.70 
   6 -18   0    2.90    0.71 
  -6  18   0    3.46    0.86 
   6 -18   0    4.28    0.94 
  -6  18   0    3.83    0.80 
   6 -18   0    3.05    0.76 
   6 -18   0    3.53    0.68 
  -6  18   0    4.20    0.97 
   0  19   0    0.44    0.43 
   0 -19   0   -0.09    0.37 
   0  19   0   -0.36    0.25 
   0 -19   0   -0.20    0.34 
   0 -19   0   -0.24    0.36 
   0 -19   0   -0.06    0.34 
  -1 -19   0    1.75    0.63 
  -1 -19   0    2.23    0.71 
   1 -19   0    1.40    0.56 
  -1  19   0    1.27    0.75 
  -1  19   0    2.17    0.71 
  -1  19   0    2.57    0.72 
   1  19   0    2.34    0.68 
  -1 -19   0    0.93    0.49 
  -1 -19   0    1.02    0.49 
   1 -19   0    1.70    0.60 
   1  19   0    1.25    0.76 
   1 -19   0    1.83    0.56 
   1 -19   0    1.48    0.61 
  -1  19   0    2.04    0.65 
   1 -19   0    1.88    0.62 
  -2 -19   0    0.61    0.52 
   2 -19   0    1.04    0.49 
  -2  19   0    1.07    0.60 
  -2 -19   0    0.62    0.54 
   2 -19   0    1.18    0.61 
  -2  19   0    1.69    0.61 
  -2  19   0    0.65    0.50 
   2 -19   0    1.15    0.57 
   2  19   0    1.40    0.54 
   2  19   0    0.55    0.66 
   2 -19   0    0.60    0.42 
   2 -19   0    1.77    0.61 
  -2 -19   0    1.10    0.58 
  -2  19   0    2.03    0.69 
  -3  19   0   13.49    1.49 
   3 -19   0   11.26    1.52 
  -3  19   0    9.69    1.37 
   3  19   0    9.11    1.41 
   3 -19   0   12.94    1.39 
   3 -19   0   11.25    1.26 
   3 -19   0    9.53    1.37 
  -3  19   0   12.02    1.46 
   3  19   0   11.09    1.40 
  -3  19   0   12.10    1.64 
  -3 -19   0   12.21    1.57 
  -3 -19   0   12.71    1.46 
   3 -19   0   11.07    1.33 
   4 -19   0    0.40    0.43 
  -4 -19   0    0.83    0.50 
   4 -19   0    0.74    0.48 
   4  19   0    0.61    0.36 
   4 -19   0    0.94    0.44 
   4 -19   0    1.49    0.51 
  -4  19   0    1.06    0.47 
  -4  19   0    1.55    0.58 
  -4  19   0    0.84    0.45 
  -4  19   0    0.99    0.55 
   4 -19   0    2.67    0.84 
   4 -19   0    0.75    0.53 
   4  19   0    0.63    0.52 
   5 -19   0   15.63    1.81 
  -5  19   0   16.06    1.66 
  -5  19   0   13.50    1.69 
  -5 -19   0   16.46    1.82 
   5 -19   0   14.55    1.61 
  -5  19   0   15.37    1.82 
   5  19   0   15.95    1.82 
   0  20   0   17.09    2.11 
   0 -20   0   18.58    1.45 
   0 -20   0   20.44    1.96 
   0 -20   0   17.49    1.81 
   0 -20   0   17.37    1.79 
   1 -20   0   12.90    1.40 
   1 -20   0   15.83    1.71 
  -1 -20   0   13.60    1.55 
   1 -20   0   14.71    1.70 
   1 -20   0   12.36    1.49 
  -1 -20   0   15.52    1.71 
  -1  20   0   16.20    2.08 
  -1 -20   0   12.88    1.42 
   2 -20   0    6.14    1.12 
  -2 -20   0    5.15    1.08 
   2 -20   0    5.54    1.03 
   2 -20   0    5.65    0.87 
   2 -20   0    6.32    0.98 
   0   0   1   -1.05    0.03 
   1   0  -1   13.33    0.42 
   1   0   1   13.20    0.47 
   1   0  -1   11.12    0.42 
  -1   0  -1   11.09    0.45 
  -1   0   1   13.00    0.42 
   1   0   1   13.06    0.47 
  -1   0  -1   12.73    0.47 
   1   0   1   11.11    0.46 
  -1   0   1   12.85    0.46 
  -1   0  -1   14.21    0.49 
   1   0   1   12.55    0.46 
   1   0  -1   13.26    0.49 
   1   0  -1   11.88    0.41 
  -1   0  -1   12.46    0.42 
  -1   0   1   13.28    0.45 
   1   0   1   13.76    0.46 
   1   0  -1   13.09    0.47 
   1   0  -1   12.69    0.43 
  -1   0  -1   13.16    0.44 
   1   0  -1   12.65    0.42 
   1   0  -1   12.55    0.46 
  -1   0   1   13.23    0.41 
  -1   0  -1   12.23    0.46 
   1   0   1   12.95    0.46 
   1   0   1   12.38    0.47 
   2   0   1   81.76    2.53 
   2   0   1   84.46    2.51 
   2   0   1   85.22    2.52 
   2   0  -1   83.41    2.48 
  -2   0  -1   83.14    2.53 
   2   0  -1   83.88    2.53 
  -2   0  -1   86.34    2.46 
  -2   0  -1   82.12    2.54 
   2   0  -1   85.98    2.54 
  -2   0  -1   82.95    2.53 
   2   0   1   81.54    2.51 
   2   0  -1   84.97    2.48 
   2   0   1   82.51    2.52 
   2   0  -1   81.37    2.53 
  -2   0   1   84.63    2.47 
   2   0  -1   81.79    2.56 
   2   0  -1   84.85    2.46 
  -2   0  -1   83.74    2.38 
  -2   0   1   83.49    2.53 
  -2   0  -1   83.45    2.51 
   2   0   1   83.21    2.50 
  -2   0   1   84.54    2.48 
   2   0  -1   85.00    2.44 
  -2   0   1   84.34    2.45 
   2   0  -1   84.32    2.39 
   2   0   1   82.01    2.53 
   2   0  -1   83.15    2.47 
  -2   0  -1   81.92    2.56 
   3   0  -1   13.40    0.52 
   3   0   1   11.93    0.60 
   3   0  -1   12.85    0.56 
   3   0  -1   13.13    0.61 
   3   0   1   12.78    0.58 
   3   0   1   13.04    0.60 
  -3   0   1   12.51    0.54 
  -3   0  -1   12.10    0.60 
   3   0  -1   12.77    0.61 
   3   0  -1   12.42    0.54 
  -3   0   1   12.64    0.61 
   3   0  -1   11.97    0.53 
  -3   0   1   12.29    0.53 
  -3   0   1   12.80    0.61 
   3   0  -1   13.44    0.65 
   3   0  -1   12.63    0.56 
   3   0   1   12.81    0.39 
  -3   0  -1   12.06    0.62 
  -3   0  -1   12.58    0.39 
   3   0   1   12.73    0.56 
   3   0  -1   12.81    0.41 
  -3   0  -1   11.47    0.58 
   3   0   1   13.12    0.59 
   3   0   1   12.50    0.61 
   3   0   1   11.93    0.58 
  -3   0  -1   12.32    0.52 
  -3   0   1   12.49    0.55 
  -3   0  -1   11.57    0.56 
   3   0  -1   12.69    0.60 
   4   0   1    5.88    0.41 
   4   0  -1    5.69    0.37 
  -4   0   1    5.69    0.44 
  -4   0  -1    6.01    0.36 
   4   0  -1    5.75    0.39 
  -4   0  -1    5.93    0.47 
  -4   0  -1    5.81    0.41 
  -4   0  -1    5.93    0.44 
   4   0  -1    5.51    0.39 
   4   0  -1    6.26    0.35 
   4   0   1    5.25    0.42 
  -4   0   1    5.79    0.38 
   4   0   1    5.30    0.41 
   4   0   1    5.92    0.41 
  -4   0  -1    6.01    0.43 
   4   0   1    6.84    0.48 
   4   0  -1    5.92    0.44 
  -4   0   1    5.99    0.38 
  -4   0  -1    5.91    0.45 
  -4   0   1    5.92    0.40 
   4   0  -1    5.64    0.43 
   4   0   1    5.55    0.38 
   4   0  -1    6.25    0.48 
   4   0   1    6.06    0.44 
  -4   0   1    5.57    0.44 
   4   0  -1    6.35    0.41 
  -5   0  -1   15.95    0.83 
  -5   0  -1   16.69    0.89 
   5   0   1   17.90    0.82 
  -5   0   1   16.32    0.74 
   5   0   1   16.59    0.87 
  -5   0  -1   16.57    0.82 
   5   0  -1   16.70    0.77 
  -5   0   1   16.51    0.80 
   5   0  -1   17.14    0.79 
   5   0  -1   16.34    0.90 
   5   0   1   16.22    0.76 
   5   0   1   16.20    0.82 
   5   0  -1   17.35    0.73 
  -5   0  -1   17.39    0.74 
  -5   0   1   15.14    0.85 
   5   0   1   16.96    0.90 
  -5   0  -1   15.66    0.84 
   5   0  -1   17.80    0.82 
   5   0  -1   17.21    0.86 
   5   0   1   17.68    0.81 
  -5   0   1   15.99    0.78 
  -5   0   1   17.56    0.90 
  -5   0  -1   15.43    0.84 
   5   0  -1   17.35    0.81 
   5   0   1   16.71    0.86 
   5   0  -1   16.88    0.88 
   6   0   1   13.41    0.75 
  -6   0  -1   12.58    0.66 
   6   0   1   13.31    0.76 
   6   0  -1   13.18    0.66 
   6   0  -1   12.81    0.79 
   6   0  -1   12.76    0.79 
   6   0   1   13.01    0.69 
  -6   0   1   12.63    0.73 
  -6   0  -1   11.42    0.78 
  -6   0   1   12.75    0.67 
  -6   0   1   12.86    0.82 
  -6   0  -1   13.00    0.76 
   6   0   1   12.99    0.81 
  -6   0  -1   13.19    0.80 
   6   0   1   13.45    0.84 
   6   0  -1   12.28    0.69 
   6   0  -1   13.49    0.75 
  -6   0   1   11.91    0.80 
   6   0  -1   15.72    0.79 
  -6   0  -1   11.89    0.80 
   6   0  -1   13.28    0.85 
  -6   0   1   12.26    0.79 
   6   0   1   13.68    0.82 
   6   0  -1   13.01    0.72 
  -7   0  -1    2.88    0.47 
   7   0   1    2.32    0.41 
   7   0   1    2.72    0.41 
   7   0   1    2.29    0.43 
  -7   0  -1    2.82    0.51 
   7   0  -1    2.88    0.56 
   7   0   1    2.72    0.48 
   7   0  -1    2.74    0.46 
  -7   0   1    2.89    0.39 
  -7   0  -1    3.18    0.54 
   7   0  -1    2.69    0.48 
  -7   0   1    1.83    0.42 
   7   0  -1    2.55    0.39 
   7   0  -1    3.21    0.40 
  -7   0   1    2.75    0.50 
   7   0   1    2.59    0.41 
  -7   0   1    2.75    0.44 
   7   0   1    2.35    0.48 
   7   0  -1    3.53    0.48 
  -7   0  -1    2.68    0.37 
   8   0   1   30.89    1.42 
  -8   0   1   30.27    1.31 
  -8   0  -1   30.69    1.58 
   8   0   1   32.28    1.35 
  -8   0  -1   30.38    1.53 
  -8   0   1   31.23    1.57 
   8   0  -1   29.99    1.37 
  -8   0  -1   32.05    1.31 
   8   0   1   31.02    1.44 
  -8   0   1   29.92    1.43 
  -8   0   1   30.76    1.54 
   8   0  -1   28.37    1.49 
   8   0  -1   31.56    1.61 
  -8   0   1   30.81    1.55 
   8   0  -1   31.60    1.40 
   8   0   1   30.63    1.53 
   8   0   1   31.22    1.59 
  -8   0  -1   29.69    1.45 
   8   0  -1   29.84    1.52 
   8   0  -1   32.74    1.30 
   8   0   1   30.76    1.53 
  -9   0  -1    4.70    0.72 
   9   0   1    7.00    0.87 
   9   0  -1    4.34    0.71 
   9   0  -1    4.73    0.61 
   9   0   1    4.15    0.61 
   9   0   1    4.83    0.78 
  -9   0   1    5.42    0.80 
   9   0  -1    3.51    0.66 
  -9   0   1    5.73    0.77 
  -9   0  -1    5.11    0.57 
  -9   0   1    4.49    0.70 
   9   0  -1    5.09    0.72 
   9   0   1    4.92    0.68 
  -9   0  -1    4.38    0.74 
  -9   0   1    4.99    0.66 
   9   0  -1    3.96    0.57 
   9   0   1    4.79    0.72 
  -9   0  -1    6.44    0.78 
  -9   0  -1    4.61    0.71 
  -9   0   1    5.41    0.60 
  10   0   1   11.83    1.00 
 -10   0   1   15.39    1.14 
  10   0  -1   15.54    1.42 
  10   0   1   13.56    0.98 
  10   0  -1   13.08    0.93 
 -10   0   1   13.35    1.05 
 -10   0  -1   12.42    1.02 
 -10   0  -1   13.96    1.11 
  10   0   1   14.57    1.00 
 -10   0   1   13.44    1.01 
  10   0  -1   14.01    0.95 
 -10   0  -1   13.86    1.03 
 -10   0   1   13.36    1.32 
  10   0   1   14.82    1.42 
  10   0   1   14.55    1.10 
  10   0  -1   13.16    1.04 
  10   0  -1   12.99    1.33 
 -10   0  -1   15.10    1.41 
 -11   0  -1    0.03    0.33 
  11   0   1   -0.13    0.30 
  11   0   1    0.22    0.31 
 -11   0   1    0.29    0.35 
  11   0   1   -0.08    0.28 
  11   0  -1    0.34    0.32 
 -11   0   1    0.13    0.33 
 -11   0   1   -0.19    0.28 
  11   0  -1   -0.21    0.21 
  11   0   1   -0.16    0.26 
  11   0   1   -0.06    0.27 
 -11   0   1   -0.19    0.28 
  11   0  -1    0.15    0.31 
 -11   0  -1    0.40    0.33 
 -11   0  -1   -0.11    0.26 
  11   0  -1    0.08    0.37 
  11   0  -1   -0.14    0.25 
 -11   0  -1   -0.07    0.29 
  12   0  -1    4.08    0.66 
 -12   0   1    4.05    0.76 
 -12   0  -1    5.04    0.88 
 -12   0  -1    5.16    0.86 
  12   0  -1    4.94    0.86 
  12   0   1    3.43    0.76 
  12   0  -1    5.42    0.93 
  12   0  -1    4.50    0.86 
  12   0   1    2.85    0.61 
 -12   0  -1    4.27    0.87 
  12   0   1    4.68    0.78 
 -12   0   1    4.45    0.84 
  12   0   1    4.68    0.91 
  12   0   1    4.60    0.88 
 -12   0   1    4.01    0.79 
 -12   0  -1    5.97    0.99 
 -12   0   1    5.70    0.99 
  12   0  -1    4.98    0.77 
  13   0  -1   -0.08    0.32 
 -13   0   1    0.66    0.43 
  13   0  -1   -0.34    0.42 
 -13   0   1    0.10    0.38 
 -13   0  -1    0.08    0.42 
 -13   0   1    1.07    0.50 
  13   0   1    0.02    0.29 
  13   0   1   -0.20    0.37 
 -13   0  -1   -0.40    0.36 
 -13   0   1   -0.06    0.38 
  13   0  -1    0.32    0.39 
  13   0   1    0.41    0.39 
  13   0   1    0.12    0.35 
  13   0  -1   -0.18    0.35 
 -13   0  -1   -0.26    0.42 
  13   0   1    0.01    0.39 
  13   0  -1   -0.12    0.25 
 -14   0   1    2.25    0.75 
  14   0   1    3.70    0.91 
  14   0  -1    2.56    0.61 
  14   0  -1    1.74    0.54 
  14   0  -1    2.51    0.76 
  14   0   1    2.13    0.63 
  14   0   1    2.06    0.67 
 -14   0   1    2.21    0.76 
  14   0  -1    2.09    0.61 
 -14   0  -1    3.48    0.86 
  14   0   1    2.31    0.69 
 -14   0  -1    2.34    0.74 
  14   0  -1    3.67    0.95 
 -14   0  -1    2.55    0.78 
  14   0  -1    2.22    0.59 
  14   0   1    2.83    0.69 
 -14   0   1    3.45    0.82 
 -14   0   1    3.00    0.77 
 -14   0  -1    2.81    0.72 
  14   0   1    1.88    0.57 
   0   1   1  107.78    2.97 
   0  -1  -1   96.94    2.97 
   0   1  -1  105.31    3.02 
   0   1  -1  107.75    3.00 
   0  -1   1  110.39    3.01 
   0  -1   1  106.01    2.99 
   0   1   1  103.74    3.00 
   0  -1  -1  109.63    3.01 
   0  -1  -1  100.18    3.00 
   0  -1  -1  101.92    3.02 
   0   1   1  104.99    2.97 
   0   1   1  101.97    3.01 
   0   1  -1  105.69    2.97 
   0  -1  -1  103.10    2.97 
   0  -1   1  107.33    3.00 
   0   1   1  105.39    2.96 
   0  -1   1  106.66    2.95 
   0  -1   1  101.97    3.01 
   0   1  -1  108.58    3.00 
   0   1  -1  104.67    2.99 
  -1  -1  -1  242.12    6.79 
  -1  -1  -1  243.27    6.81 
  -1   1   1  238.81    6.78 
   1  -1   1  241.80    6.81 
   1   1  -1  247.51    6.79 
   1  -1   1  244.36    6.79 
  -1  -1  -1  239.80    6.78 
   1  -1   1  247.58    6.83 
   1  -1   1  245.60    6.78 
  -1  -1  -1  244.27    6.81 
   1   1  -1  249.13    6.77 
   1  -1   1  237.89    6.77 
   1   1  -1  241.62    6.79 
   1   1  -1  248.64    6.79 
   1  -1   1  245.62    6.78 
   1   1  -1  245.35    6.77 
   1   1  -1  239.66    6.77 
   1   1  -1  239.57    6.77 
   1   1  -1  230.86    6.77 
  -1  -1  -1  240.66    6.75 
  -1  -1  -1  237.38    6.79 
  -1   1   1  241.30    6.77 
  -1  -1  -1  235.43    6.80 
   1   1   1  242.59    6.77 
  -1  -1   1  234.59    6.80 
   1  -1  -1  240.79    6.76 
   1  -1  -1  229.30    6.73 
  -1  -1   1  249.34    6.79 
   1   1   1  240.27    6.80 
  -1  -1   1  237.99    6.77 
  -1   1  -1  236.46    6.78 
   1   1   1  236.45    6.79 
  -1   1  -1  229.32    6.77 
   1  -1  -1  233.40    6.76 
  -1   1  -1  242.46    6.82 
  -1  -1   1  237.87    6.77 
   1  -1  -1  231.71    6.78 
   1   1   1  233.58    6.79 
   1   1   1  237.77    6.79 
   1  -1  -1  237.53    6.74 
   1  -1  -1  240.06    6.79 
   1  -1  -1  240.52    6.79 
  -1   1  -1  239.02    6.77 
  -1  -1   1  231.37    6.79 
  -1  -1   1  241.91    6.76 
  -1  -1   1  240.63    6.75 
  -1   1  -1  241.83    6.74 
   1   1   1  243.95    6.79 
   1  -1  -1  238.86    6.78 
  -1   1  -1  241.48    6.79 
  -2   1   1   60.11    1.69 
   2   1  -1   57.64    1.81 
   2   1  -1   58.14    1.79 
   2   1  -1   59.46    1.62 
   2   1  -1   58.80    1.77 
   2   1  -1   59.28    1.75 
  -2   1   1   58.65    1.79 
  -2  -1  -1   61.12    1.82 
   2  -1   1   59.46    1.76 
  -2   1   1   60.35    1.68 
  -2   1   1   57.45    1.81 
  -2   1   1   57.89    1.68 
  -2  -1  -1   60.90    1.82 
   2  -1   1   59.17    1.80 
   2  -1   1   56.97    1.77 
   2   1  -1   61.37    1.78 
  -2  -1  -1   59.14    1.77 
   2   1  -1   60.99    1.80 
   2   1  -1   56.39    1.74 
   2  -1   1   57.46    1.78 
   2  -1   1   59.52    1.82 
   2  -1   1   57.88    1.76 
   2  -1   1   57.69    1.76 
   2   1  -1   54.12    1.75 
   2   1  -1   59.06    1.69 
  -2  -1  -1   56.01    1.74 
   2   1  -1   59.44    1.74 
  -2   1   1   57.92    1.67 
   2  -1   1   60.36    1.76 
  -2  -1  -1   57.05    1.77 
  -2  -1  -1   59.68    1.76 
  -2  -1  -1   58.45    1.80 
  -2   1  -1   54.20    1.66 
  -2   1  -1   56.14    1.64 
   2  -1  -1   54.33    1.77 
  -2  -1   1   56.67    1.77 
  -2  -1   1   53.54    1.74 
   2  -1  -1   53.81    1.70 
  -2  -1   1   51.77    1.73 
   2  -1  -1   53.97    1.78 
   2   1   1   54.47    1.79 
   2   1   1   53.61    1.77 
   2   1   1   53.48    1.78 
  -2   1  -1   53.46    1.74 
   2   1   1   55.13    1.72 
   2  -1  -1   53.89    1.74 
  -2   1  -1   52.85    1.81 
  -2   1  -1   56.73    1.78 
   2   1   1   54.41    1.77 
   2   1   1   54.67    1.77 
   2   1   1   54.35    1.76 
   2  -1  -1   55.27    1.75 
  -2  -1   1   51.95    1.74 
  -2  -1   1   55.01    1.76 
   2  -1  -1   54.68    1.67 
  -2   1  -1   54.25    1.79 
   2  -1  -1   55.17    1.70 
  -2  -1   1   51.90    1.77 
   2  -1  -1   52.86    1.81 
   2   1   1   54.43    1.68 
   2  -1  -1   53.99    1.69 
   2  -1  -1   54.33    1.69 
  -2  -1   1   53.92    1.72 
   3  -1   1  168.14    4.92 
  -3  -1  -1  162.93    4.94 
  -3   1   1  166.15    4.86 
   3   1  -1  161.84    4.89 
   3   1  -1  172.32    4.77 
   3  -1   1  162.07    4.95 
  -3  -1  -1  166.26    4.96 
   3  -1   1  164.79    4.99 
  -3   1   1  167.29    4.74 
  -3  -1  -1  169.54    4.99 
  -3   1   1  168.28    5.00 
   3   1  -1  173.01    4.78 
   3   1  -1  167.79    5.00 
  -3  -1  -1  168.26    4.91 
   3   1  -1  161.73    4.97 
  -3   1   1  164.65    4.84 
  -3  -1  -1  161.94    4.93 
   3  -1   1  167.77    4.95 
   3   1  -1  166.69    4.98 
   3   1  -1  165.18    4.90 
   3  -1   1  164.61    4.94 
   3  -1   1  168.69    4.95 
  -3  -1  -1  167.08    4.99 
   3  -1   1  159.77    4.90 
   3   1  -1  168.30    4.93 
   3   1  -1  164.46    4.90 
  -3   1   1  169.91    4.82 
   3   1  -1  167.60    4.93 
   3  -1   1  171.08    4.91 
  -3   1   1  166.09    4.98 
  -3  -1   1  160.65    4.92 
   3  -1  -1  167.21    4.88 
   3   1   1  164.85    4.99 
  -3   1  -1  171.32    4.79 
  -3  -1   1  164.19    4.96 
   3   1   1  168.99    4.97 
  -3  -1   1  173.37    4.96 
   3  -1  -1  169.94    4.97 
  -3  -1   1  166.69    4.92 
  -3  -1   1  168.78    4.90 
   3   1   1  168.40    4.86 
   3   1   1  173.44    4.95 
   3   1   1  165.54    4.94 
   3   1   1  169.88    4.97 
  -3   1  -1  168.21    4.74 
   3  -1  -1  167.53    4.93 
   3   1   1  173.17    4.97 
  -3   1  -1  166.40    4.91 
  -3  -1   1  167.66    4.95 
  -3  -1   1  166.22    4.96 
   3  -1  -1  170.77    4.86 
  -3   1  -1  166.01    4.98 
  -3   1  -1  169.39    5.02 
   3  -1  -1  164.08    4.97 
   3  -1  -1  168.77    5.03 
  -3   1  -1  164.56    4.94 
   3  -1  -1  172.37    4.88 
   3  -1  -1  178.08    4.86 
   3   1   1  177.79    4.77 
  -3   1  -1  172.34    4.96 
  -3  -1   1  167.54    4.92 
   3  -1  -1  175.37    4.91 
   4   1  -1    5.40    0.50 
  -4  -1  -1    5.12    0.48 
   4   1  -1    4.56    0.36 
   4   1  -1    5.30    0.24 
  -4  -1  -1    4.80    0.47 
   4  -1   1    4.66    0.36 
  -4   1   1    4.35    0.19 
   4  -1   1    5.12    0.38 
   4  -1   1    4.10    0.34 
  -4  -1  -1    6.12    0.57 
  -4  -1  -1    4.98    0.39 
  -4  -1  -1    5.94    0.55 
   4  -1   1    5.41    0.41 
   4  -1   1    4.82    0.49 
   4  -1   1    4.88    0.38 
   4   1  -1    5.43    0.50 
   4   1  -1    4.87    0.47 
  -4   1   1    4.66    0.29 
   4   1  -1    5.31    0.37 
  -4  -1  -1    4.31    0.34 
   4  -1   1    4.35    0.44 
  -4   1   1    4.30    0.33 
  -4   1   1    4.55    0.47 
   4   1  -1    4.56    0.35 
  -4   1   1    4.17    0.33 
   4  -1   1    5.91    0.41 
   4   1  -1    4.69    0.27 
   4   1  -1    5.30    0.51 
   4   1  -1    4.77    0.36 
  -4   1   1    4.23    0.44 
   4   1   1    4.76    0.47 
   4   1   1    4.51    0.37 
  -4  -1   1    4.47    0.35 
  -4  -1   1    5.15    0.39 
  -4  -1   1    4.33    0.44 
   4  -1  -1    5.20    0.54 
   4  -1  -1    4.90    0.34 
   4   1   1    5.16    0.42 
   4  -1  -1    4.89    0.39 
   4   1   1    4.86    0.22 
  -4   1  -1    5.01    0.50 
   4  -1  -1    4.35    0.44 
   4   1   1    4.67    0.45 
  -4  -1   1    5.07    0.48 
  -4  -1   1    4.37    0.35 
   4   1   1    5.33    0.51 
   4  -1  -1    4.85    0.36 
  -4  -1   1    4.65    0.36 
   4  -1  -1    3.87    0.31 
  -4  -1   1    4.63    0.46 
   4   1   1    4.46    0.32 
   4  -1  -1    4.81    0.35 
  -4   1  -1    4.53    0.36 
   4   1   1    4.92    0.39 
  -4   1  -1    4.78    0.28 
  -4   1  -1    5.16    0.51 
   4  -1  -1    4.40    0.34 
  -4   1  -1    5.18    0.40 
  -4   1  -1    4.82    0.38 
   5   1  -1    6.47    0.46 
   5  -1   1    6.87    0.66 
   5  -1   1    6.19    0.50 
   5  -1   1    6.54    0.47 
   5   1  -1    7.42    0.58 
   5   1  -1    6.86    0.26 
   5   1  -1    5.51    0.44 
  -5   1   1    6.51    0.45 
  -5  -1  -1    5.69    0.48 
  -5  -1  -1    5.97    0.43 
   5   1  -1    6.60    0.47 
  -5  -1  -1    6.58    0.53 
  -5   1   1    6.12    0.39 
  -5  -1  -1    5.99    0.60 
  -5   1   1    6.66    0.65 
   5   1  -1    6.24    0.36 
   5   1  -1    7.25    0.50 
   5   1  -1    6.01    0.50 
   5  -1   1    5.12    0.54 
   5   1  -1    6.25    0.49 
  -5   1   1    8.17    0.72 
   5  -1   1    5.90    0.45 
   5   1  -1    8.00    0.71 
  -5   1   1    5.69    0.44 
  -5  -1  -1    7.24    0.65 
   5  -1   1    6.05    0.48 
  -5  -1  -1    6.00    0.57 
   5  -1   1    6.13    0.47 
  -5  -1   1    6.85    0.52 
   5  -1  -1    7.14    0.47 
  -5   1  -1    7.34    0.49 
  -5  -1   1    7.43    0.48 
   5  -1  -1    7.27    0.53 
  -5  -1   1    7.13    0.51 
   5   1   1    6.84    0.50 
  -5   1  -1    6.90    0.53 
   5  -1  -1    7.31    0.48 
   5  -1  -1    6.42    0.49 
  -5  -1   1    6.86    0.48 
  -5  -1   1    6.87    0.48 
   5   1   1    6.23    0.50 
   5  -1  -1    7.71    0.46 
  -5   1  -1    6.93    0.39 
   5  -1  -1    6.60    0.65 
  -5  -1   1    7.16    0.54 
  -5   1  -1    6.62    0.50 
   5  -1  -1    7.42    0.46 
   5   1   1    6.40    0.41 
  -5   1  -1    6.81    0.51 
   5   1   1    6.78    0.49 
   5   1   1    6.59    0.53 
   5   1   1    6.66    0.54 
   5  -1  -1    7.45    0.48 
  -5   1  -1    8.05    0.58 
  -5  -1   1    6.77    0.52 
   5   1   1    7.42    0.51 
  -6  -1  -1   11.67    0.76 
  -6  -1  -1   13.70    0.79 
   6   1  -1   14.34    0.76 
   6   1  -1   13.57    0.77 
  -6  -1  -1   12.77    0.82 
  -6   1   1   12.01    0.70 
  -6   1   1   12.32    0.73 
  -6  -1  -1   13.39    0.71 
   6  -1   1   12.56    0.78 
   6  -1   1   14.48    0.80 
   6  -1   1   13.48    0.74 
   6   1  -1   13.03    0.79 
  -6  -1  -1   13.96    0.83 
   6  -1   1   12.98    0.73 
   6   1  -1   13.21    0.86 
   6   1  -1   12.66    0.80 
  -6   1   1   12.76    0.83 
   6  -1   1   13.54    0.82 
   6   1  -1   12.50    0.74 
  -6   1   1   12.44    0.81 
   6   1  -1   14.01    0.62 
   6   1  -1   12.48    0.71 
  -6  -1  -1   13.16    0.77 
  -6  -1  -1   11.31    0.76 
  -6   1   1   13.42    0.64 
   6  -1   1   13.18    0.84 
   6  -1   1   12.42    0.75 
   6   1  -1   12.63    0.80 
  -6  -1   1   12.91    0.71 
  -6   1  -1   12.53    0.76 
  -6   1  -1   13.61    0.80 
   6  -1  -1   13.83    0.75 
   6   1   1   11.69    0.64 
   6   1   1   14.07    0.79 
   6   1   1   12.82    0.81 
   6   1   1   12.66    0.80 
   6  -1  -1   14.07    0.75 
   6  -1  -1   11.97    0.83 
   6  -1  -1   13.58    0.81 
   6  -1  -1   12.56    0.69 
  -6  -1   1   12.46    0.79 
  -6  -1   1   12.11    0.73 
   6   1   1   12.66    0.80 
  -6   1  -1   12.65    0.62 
  -6  -1   1   11.93    0.79 
  -6   1  -1   11.98    0.80 
   6  -1  -1   13.12    0.70 
  -6  -1   1   11.80    0.72 
  -6  -1   1   12.84    0.79 
   6  -1  -1   13.02    0.71 
  -6  -1   1   13.82    0.81 
  -6   1  -1   14.46    0.89 
   6   1   1   13.98    0.77 
   6  -1  -1   13.42    0.78 
  -6   1  -1   12.50    0.74 
   6   1   1   14.31    0.78 
   7   1  -1    9.46    0.89 
   7  -1   1   10.49    0.66 
   7   1  -1    9.48    0.53 
  -7  -1  -1    9.05    0.74 
  -7  -1  -1    9.60    0.90 
   7  -1   1    7.86    0.67 
  -7  -1  -1    9.19    0.61 
   7   1  -1    9.06    0.71 
  -7   1   1    9.59    0.92 
   7  -1   1    8.98    0.67 
  -7   1   1    8.67    0.55 
   7   1  -1   10.70    1.00 
   7  -1   1    8.71    0.64 
   7   1  -1   11.23    0.71 
   7  -1   1    9.90    0.78 
  -7   1   1    9.51    0.76 
  -7  -1  -1    8.72    0.69 
  -7  -1  -1    8.61    0.69 
  -7  -1  -1    9.22    0.74 
   7   1  -1    8.93    0.64 
   7  -1   1    8.71    0.69 
  -7   1   1    8.99    0.65 
  -7  -1   1    9.39    0.88 
  -7   1  -1    9.00    0.67 
   7  -1  -1   10.03    0.62 
  -7  -1   1    9.91    0.70 
  -7  -1   1   10.37    0.76 
   7  -1  -1   10.17    0.74 
   7   1   1    8.94    0.72 
  -7   1  -1    9.50    0.55 
   7   1   1    9.32    0.72 
   7   1   1    8.90    0.68 
  -7  -1   1    9.76    0.73 
   7   1   1   10.16    0.60 
   7  -1  -1    8.83    0.63 
  -7   1  -1    9.93    0.78 
   7  -1  -1    9.89    0.96 
   7  -1  -1   10.09    0.64 
  -7   1  -1    9.80    0.92 
   7   1   1    9.66    0.75 
   7  -1  -1   10.06    0.72 
  -7  -1   1    9.84    0.64 
   7   1   1    9.32    0.67 
   8  -1   1    7.33    0.88 
   8   1  -1    6.44    0.77 
  -8  -1  -1    8.18    0.90 
   8   1  -1    6.38    0.77 
   8  -1   1    8.18    0.79 
  -8   1   1    7.17    0.83 
  -8   1   1    6.42    0.67 
  -8   1   1    6.88    0.50 
   8  -1   1    6.22    0.75 
  -8  -1  -1    7.05    0.85 
   8   1  -1    6.20    0.66 
  -8  -1  -1    6.97    0.67 
   8   1  -1    7.46    0.73 
  -8  -1  -1    7.44    0.81 
   8  -1   1    8.74    0.88 
   8  -1   1    6.20    0.67 
  -8  -1  -1    7.37    0.77 
   8   1  -1    6.54    0.82 
   8  -1   1    7.26    0.72 
  -8   1   1    6.58    0.80 
   8  -1  -1    7.85    0.83 
   8   1   1    7.67    0.90 
   8  -1  -1    7.25    0.59 
   8  -1  -1    6.77    0.54 
   8   1   1    7.11    0.53 
   8  -1  -1    6.27    0.78 
   8   1   1    7.62    0.83 
   8   1   1    6.56    0.71 
   8   1   1    6.47    0.70 
   8  -1  -1    6.57    0.84 
   8  -1  -1    7.96    0.74 
  -8   1  -1    5.55    0.75 
  -8  -1   1    6.31    0.76 
  -8   1  -1    7.16    0.50 
  -8  -1   1    7.27    0.77 
  -8  -1   1    7.63    0.71 
  -8  -1   1    6.33    0.80 
  -8  -1   1    7.21    0.81 
   8   1   1    5.83    0.73 
  -8   1  -1    7.53    0.78 
  -8   1  -1    5.74    0.76 
   9  -1   1    1.02    0.39 
   9   1  -1    2.48    0.47 
   9   1  -1    1.96    0.44 
   9  -1   1    1.33    0.38 
  -9  -1  -1    1.24    0.33 
   9  -1   1    1.71    0.40 
  -9  -1  -1    1.78    0.46 
  -9  -1  -1    1.21    0.44 
   9   1  -1    1.73    0.48 
  -9   1   1    1.50    0.42 
  -9   1   1    1.70    0.47 
   9  -1   1    1.33    0.44 
   9   1  -1    1.64    0.46 
  -9  -1  -1    1.50    0.44 
  -9   1   1    1.65    0.42 
   9   1  -1    1.96    0.47 
  -9  -1  -1    1.35    0.41 
   9  -1   1    1.58    0.36 
   9  -1   1    1.80    0.47 
  -9   1  -1    2.21    0.54 
  -9  -1   1    1.73    0.44 
  -9  -1   1    1.44    0.37 
   9  -1  -1    1.09    0.33 
   9  -1  -1    2.01    0.47 
  -9  -1   1    1.48    0.43 
   9  -1  -1    1.91    0.39 
  -9   1  -1    0.86    0.35 
   9   1   1    1.77    0.42 
   9  -1  -1    1.66    0.46 
   9   1   1    1.07    0.39 
  -9  -1   1    1.84    0.50 
  -9  -1   1    1.25    0.41 
   9   1   1    0.68    0.40 
  -9   1  -1    1.14    0.37 
   9   1   1    1.30    0.44 
   9   1   1    1.75    0.42 
   9  -1  -1    1.62    0.49 
  10  -1   1    0.69    0.40 
 -10  -1  -1    1.06    0.40 
 -10   1   1    0.12    0.37 
 -10   1   1    0.80    0.37 
 -10  -1  -1    0.24    0.31 
  10   1  -1    0.64    0.33 
 -10   1   1    0.21    0.30 
  10   1  -1    0.65    0.41 
  10   1  -1    0.91    0.44 
  10   1  -1    1.02    0.34 
  10  -1   1    0.12    0.30 
  10   1  -1    0.54    0.39 
  10  -1   1    0.95    0.38 
 -10   1   1    0.94    0.42 
 -10  -1  -1    0.55    0.35 
  10  -1   1    1.10    0.37 
  10  -1   1    0.94    0.40 
 -10  -1  -1    0.64    0.37 
  10  -1  -1    0.46    0.28 
 -10   1  -1    0.17    0.26 
  10  -1  -1    0.38    0.32 
  10  -1  -1    0.40    0.31 
 -10  -1   1    0.87    0.39 
 -10   1  -1    0.39    0.36 
  10   1   1    0.40    0.33 
  10   1   1    0.31    0.30 
 -10  -1   1    0.86    0.40 
 -10  -1   1    1.02    0.35 
  10  -1  -1    0.77    0.32 
  10   1   1    0.97    0.37 
  10  -1  -1    0.41    0.35 
  10   1   1    0.43    0.37 
  10   1   1    0.15    0.30 
 -10  -1   1    0.77    0.36 
 -10   1  -1    0.47    0.32 
 -10  -1   1    1.35    0.51 
  11   1  -1    7.99    0.93 
 -11  -1  -1    8.37    1.11 
  11   1  -1    7.49    0.85 
  11   1  -1    8.75    1.15 
 -11  -1  -1    8.35    1.06 
 -11   1   1    8.25    1.08 
  11  -1   1   10.18    1.14 
  11  -1   1    8.48    1.08 
  11  -1   1    6.83    0.84 
 -11  -1  -1    9.32    1.15 
 -11   1   1    9.15    1.09 
  11   1  -1    7.70    1.04 
  11  -1   1    9.10    1.01 
  11  -1   1   10.44    1.28 
 -11   1   1    8.87    1.10 
  11   1  -1    7.19    1.03 
 -11   1   1    8.02    0.96 
 -11  -1  -1   10.05    1.11 
 -11   1  -1    9.66    1.16 
  11   1   1    8.67    0.98 
 -11   1  -1    8.79    1.03 
  11  -1  -1    7.30    1.08 
  11   1   1    9.21    1.20 
  11  -1  -1   11.20    1.25 
  11   1   1   10.57    1.18 
  11   1   1    8.83    0.96 
  11  -1  -1    8.34    0.90 
 -11  -1   1   11.79    1.24 
 -11   1  -1    7.07    1.01 
 -11  -1   1   11.33    1.28 
 -11  -1   1    9.85    1.09 
  11  -1  -1    8.31    0.88 
 -11   1  -1   12.58    1.34 
  11  -1  -1    8.25    1.02 
  11   1   1    9.11    1.10 
 -11  -1   1   10.67    1.25 
  12  -1   1    5.75    0.93 
  12   1  -1    5.61    0.97 
 -12   1   1    5.48    0.94 
 -12  -1  -1    7.16    1.09 
  12  -1   1    6.77    1.01 
  12   1  -1    7.35    1.03 
 -12   1   1    6.32    1.01 
 -12  -1  -1    7.47    1.03 
  12  -1   1    5.00    0.76 
 -12  -1  -1    6.43    0.97 
 -12   1   1    5.67    0.99 
  12   1  -1    6.72    1.06 
  12   1  -1    5.56    0.79 
  12  -1   1    6.71    0.88 
  12  -1   1    6.12    1.02 
  12   1  -1    5.53    0.81 
 -12   1   1    7.10    0.96 
 -12  -1  -1    6.45    1.04 
  12  -1  -1    7.07    1.02 
  12   1   1    7.99    1.13 
  12   1   1    6.43    0.99 
  12  -1  -1    5.54    0.92 
  12  -1  -1    6.93    1.09 
 -12   1  -1    6.02    0.95 
 -12  -1   1    6.45    0.99 
 -12  -1   1    5.71    0.95 
 -12   1  -1    5.88    0.97 
  12  -1  -1    7.12    0.87 
  12  -1  -1    5.79    0.81 
  12   1   1    4.41    0.77 
 -12  -1   1    6.90    1.04 
  12   1   1    6.39    0.88 
  12  -1  -1    6.75    0.84 
 -12   1  -1    7.74    1.03 
  12   1   1    6.35    1.00 
 -12   1  -1    5.64    0.95 
 -12  -1   1    7.55    1.04 
  13  -1   1   13.69    1.47 
  13  -1   1   12.23    1.50 
  13  -1   1   11.65    1.37 
 -13   1   1   11.50    1.26 
  13  -1   1   14.68    1.37 
 -13   1   1   10.41    1.36 
  13   1  -1   12.23    1.55 
 -13  -1  -1   13.00    1.42 
 -13  -1  -1   11.28    1.42 
  13   1  -1   12.34    1.41 
 -13   1   1   15.58    1.66 
 -13   1   1   13.15    1.50 
  13   1  -1   12.21    1.46 
  13  -1   1   11.12    1.17 
  13   1  -1   12.77    1.26 
 -13  -1  -1   13.06    1.51 
  13  -1   1   10.56    1.14 
  13   1  -1   10.26    1.12 
 -13  -1  -1   13.75    1.49 
 -13   1  -1   12.35    1.43 
 -13  -1   1   12.88    1.45 
  13  -1  -1   13.10    1.60 
  13  -1  -1   10.78    1.11 
  13   1   1   14.10    1.53 
 -13   1  -1   11.65    1.37 
 -13   1  -1   14.14    1.47 
  13  -1  -1   12.36    1.23 
 -13   1  -1   10.60    1.40 
 -13  -1   1   11.98    1.44 
  13  -1  -1   10.99    1.33 
  13   1   1   11.50    1.45 
  13  -1  -1   12.82    1.01 
 -13  -1   1   15.60    1.55 
  13   1   1   14.98    1.43 
  13   1   1   13.66    1.54 
  13  -1  -1   13.34    1.43 
  13   1   1   11.26    1.28 
 -13  -1   1   15.01    1.60 
  14  -1   1    0.37    0.38 
  14   1  -1    0.31    0.46 
 -14   1   1   -0.04    0.36 
  14  -1   1    0.66    0.51 
  14   1  -1   -1.09    0.34 
 -14   1   1    0.89    0.49 
 -14  -1  -1    0.19    0.41 
  14   1  -1    0.41    0.39 
 -14  -1  -1    1.33    0.66 
  14  -1   1    0.21    0.41 
 -14   1   1   -0.16    0.43 
 -14   1   1   -0.13    0.42 
  14   1  -1    0.27    0.47 
 -14  -1  -1    0.27    0.38 
  14  -1   1    0.62    0.41 
  14  -1   1   -0.06    0.34 
  14   1  -1    0.30    0.32 
  14  -1   1    0.09    0.34 
 -14  -1  -1    0.49    0.45 
 -14   1  -1    0.44    0.47 
  14  -1  -1    0.06    0.48 
 -14  -1   1    0.04    0.40 
  14  -1  -1    0.18    0.38 
 -14   1  -1   -0.69    0.37 
  14   1   1    0.46    0.38 
  14   1   1    0.60    0.45 
 -14  -1   1    0.57    0.41 
 -14   1  -1    0.28    0.47 
 -14   1  -1   -0.19    0.44 
  14   1   1    0.07    0.43 
  14   1   1    0.52    0.40 
 -14  -1   1    0.10    0.40 
  14  -1  -1    0.21    0.33 
 -14  -1   1    0.90    0.55 
  14  -1  -1    0.21    0.32 
  14   1   1   -0.11    0.37 
  14  -1  -1    0.10    0.45 
   0  -2   1   20.40    0.70 
   0   2  -1   20.62    0.71 
   0  -2   1   20.22    0.74 
   0   2  -1   20.75    0.72 
   0   2  -1   21.86    0.71 
   0   2   1   20.63    0.69 
   0  -2  -1   20.27    0.68 
   0   2  -1   21.25    0.73 
   0  -2  -1   20.01    0.68 
   0  -2  -1   20.86    0.69 
   0  -2  -1   20.89    0.71 
   0   2   1   20.67    0.69 
   0  -2   1   20.47    0.70 
   0  -2  -1   21.19    0.73 
   0   2  -1   20.02    0.65 
   0   2   1   21.06    0.62 
   0  -2  -1   21.52    0.69 
   0  -2  -1   20.12    0.70 
   0  -2   1   19.92    0.67 
   0   2  -1   19.71    0.75 
   0   2   1   19.77    0.68 
   0  -2   1   20.92    0.73 
   0   2   1   20.35    0.64 
   0   2   1   21.30    0.76 
   0   2   1   19.84    0.68 
   0  -2  -1   20.38    0.70 
   0   2   1   20.33    0.74 
   0  -2  -1   21.36    0.73 
   0  -2   1   21.00    0.72 
   0   2  -1   20.59    0.73 
   0  -2   1   21.25    0.71 
  -1   2   1   15.80    0.52 
  -1   2   1   14.88    0.60 
   1   2  -1   14.83    0.61 
   1   2  -1   14.46    0.58 
  -1  -2  -1   15.80    0.62 
   1  -2   1   15.12    0.57 
   1   2  -1   14.70    0.59 
   1  -2   1   14.87    0.52 
   1   2  -1   15.23    0.58 
  -1   2   1   16.39    0.61 
   1  -2   1   15.43    0.58 
   1  -2   1   15.97    0.65 
   1  -2   1   15.34    0.59 
  -1  -2  -1   16.08    0.60 
   1   2  -1   14.82    0.59 
  -1   2   1   15.31    0.57 
   1  -2   1   15.57    0.59 
  -1   2   1   15.81    0.52 
   1  -2   1   14.29    0.58 
  -1  -2  -1   15.70    0.62 
   1  -2   1   14.41    0.61 
  -1  -2  -1   15.66    0.58 
   1  -2   1   14.91    0.50 
   1   2  -1   15.62    0.60 
   1   2  -1   14.65    0.56 
  -1  -2  -1   15.70    0.61 
  -1  -2  -1   15.43    0.60 
  -1  -2  -1   15.70    0.53 
   1  -2  -1   16.54    0.54 
   1   2   1   15.75    0.60 
   1   2   1   16.70    0.61 
  -1  -2   1   15.85    0.55 
   1  -2  -1   16.12    0.61 
  -1   2  -1   15.57    0.59 
  -1   2  -1   15.40    0.59 
   1   2   1   16.69    0.63 
  -1   2  -1   16.10    0.60 
   1   2   1   16.86    0.53 
   1  -2  -1   16.51    0.51 
  -1  -2   1   16.43    0.54 
   1   2   1   16.77    0.60 
   1  -2  -1   16.10    0.62 
   1   2   1   16.23    0.60 
  -1  -2   1   15.60    0.59 
  -1  -2   1   15.66    0.62 
   1   2   1   16.42    0.61 
  -1   2  -1   16.08    0.59 
  -1   2  -1   15.82    0.61 
  -1  -2   1   15.63    0.62 
   1  -2  -1   16.75    0.55 
  -1  -2   1   15.80    0.59 
  -1   2  -1   15.58    0.61 
   1  -2  -1   16.28    0.54 
   1  -2  -1   16.53    0.55 
   1  -2  -1   16.26    0.54 
   1  -2  -1   16.96    0.64 
  -1  -2   1   16.72    0.63 
   1  -2  -1   16.01    0.61 
  -1   2  -1   16.08    0.60 
   2   2  -1   16.66    0.66 
  -2  -2  -1   17.14    0.71 
   2  -2   1   16.97    0.68 
  -2   2   1   16.20    0.64 
  -2  -2  -1   17.15    0.73 
   2  -2   1   15.80    0.64 
  -2  -2  -1   16.88    0.70 
  -2   2   1   16.85    0.59 
   2  -2   1   17.03    0.68 
   2  -2   1   16.89    0.73 
   2  -2   1   16.93    0.73 
  -2  -2  -1   17.38    0.65 
   2   2  -1   17.41    0.69 
   2  -2   1   16.06    0.66 
   2   2  -1   16.62    0.70 
  -2   2   1   16.48    0.60 
  -2  -2  -1   16.98    0.66 
   2   2  -1   16.70    0.54 
   2  -2   1   16.11    0.66 
  -2  -2  -1   16.73    0.70 
   2  -2   1   16.07    0.66 
   2   2  -1   16.35    0.67 
  -2  -2  -1   17.45    0.70 
   2   2  -1   16.80    0.70 
  -2   2   1   16.87    0.70 
   2   2  -1   17.02    0.67 
  -2   2   1   17.16    0.73 
   2   2   1   17.76    0.72 
  -2   2  -1   17.32    0.71 
   2   2   1   18.60    0.64 
  -2  -2   1   17.50    0.68 
   2   2   1   17.83    0.72 
   2  -2  -1   17.53    0.62 
  -2  -2   1   16.68    0.65 
  -2   2  -1   17.60    0.72 
   2   2   1   18.30    0.65 
   2  -2  -1   18.56    0.58 
   2  -2  -1   18.48    0.62 
   2  -2  -1   18.30    0.63 
   2   2   1   19.27    0.72 
   2  -2  -1   17.95    0.72 
  -2  -2   1   17.50    0.54 
  -2  -2   1   16.19    0.69 
   2   2   1   17.59    0.70 
  -2   2  -1   17.43    0.75 
   2  -2  -1   17.17    0.69 
  -2   2  -1   17.49    0.66 
   2  -2  -1   17.77    0.62 
  -2  -2   1   17.45    0.69 
  -2  -2   1   16.51    0.70 
   2  -2  -1   17.63    0.75 
  -2  -2   1   18.11    0.72 
  -2   2  -1   16.04    0.67 
  -2   2  -1   17.23    0.65 
   2   2   1   18.49    0.72 
  -3  -2  -1  300.13    8.91 
   3   2  -1  306.00    8.97 
   3   2  -1  310.34    8.93 
   3  -2   1  305.41    8.90 
  -3  -2  -1  304.98    8.96 
  -3  -2  -1  311.03    9.00 
   3  -2   1  301.69    8.94 
  -3   2   1  311.66    8.75 
   3  -2   1  305.94    9.01 
  -3   2   1  309.59    8.82 
   3  -2   1  302.79    8.98 
   3  -2   1  306.30    8.90 
   3   2  -1  314.17    8.92 
  -3   2   1  310.95    9.02 
  -3   2   1  300.38    8.82 
   3   2  -1  315.74    8.71 
   3  -2   1  302.97    8.86 
   3   2  -1  308.09    8.93 
   3   2  -1  316.15    8.83 
  -3  -2  -1  298.45    8.89 
   3   2  -1  308.90    8.91 
   3  -2   1  308.16    8.90 
   3   2  -1  303.60    8.99 
  -3  -2  -1  312.57    8.94 
   3  -2   1  320.95    8.94 
   3  -2   1  308.65    8.90 
  -3  -2  -1  307.96    8.95 
  -3   2   1  310.45    8.80 
  -3  -2  -1  307.83    8.97 
   3  -2   1  302.69    8.90 
   3   2  -1  315.34    8.99 
  -3   2   1  308.70    8.97 
   3   2   1  321.07    9.00 
   3   2   1  319.74    8.83 
  -3   2  -1  316.90    8.94 
  -3   2  -1  311.51    9.03 
   3  -2  -1  314.68    8.95 
   3   2   1  320.31    8.98 
   3   2   1  310.32    8.97 
   3  -2  -1  328.54    8.85 
  -3   2  -1  296.09    8.91 
  -3  -2   1  301.59    8.92 
   3  -2  -1  297.75    8.82 
   3   2   1  313.25    8.90 
   3   2   1  315.43    8.95 
  -3  -2   1  323.50    8.93 
  -3   2  -1  309.32    8.89 
  -3   2  -1  299.69    8.99 
  -3  -2   1  308.26    8.95 
  -3   2  -1  311.22    8.80 
  -3  -2   1  315.18    8.92 
   3  -2  -1  315.87    8.89 
   3  -2  -1  318.31    9.04 
   3   2   1  320.10    8.83 
  -3   2  -1  316.76    8.69 
   3  -2  -1  319.96    8.97 
   3  -2  -1  324.51    8.86 
  -3  -2   1  329.58    8.99 
   3   2   1  310.10    8.95 
   3   2   1  319.38    8.96 
  -3  -2   1  305.01    8.94 
   3  -2  -1  320.84    8.85 
  -4   2   1   76.97    2.47 
   4   2  -1   80.59    2.34 
  -4   2   1   77.41    2.63 
   4  -2   1   79.33    2.54 
   4  -2   1   78.05    2.67 
   4   2  -1   79.29    2.66 
  -4  -2  -1   75.75    2.63 
   4  -2   1   84.07    2.60 
  -4  -2  -1   76.72    2.60 
   4   2  -1   76.81    2.54 
  -4  -2  -1   78.31    2.58 
  -4   2   1   77.65    2.49 
   4  -2   1   76.89    2.60 
  -4  -2  -1   79.39    2.57 
  -4   2   1   78.86    2.36 
  -4   2   1   80.39    2.38 
   4  -2   1   80.03    2.55 
   4  -2   1   80.03    2.62 
   4   2  -1   77.69    2.64 
   4   2  -1   80.43    2.40 
  -4  -2  -1   77.91    2.59 
  -4  -2  -1   77.06    2.55 
   4   2  -1   77.62    2.58 
   4   2  -1   80.00    2.56 
   4   2  -1   80.48    2.56 
  -4  -2  -1   77.70    2.62 
   4   2  -1   76.51    2.62 
   4  -2   1   79.87    2.57 
   4  -2   1   78.00    2.53 
  -4   2   1   78.13    2.67 
  -4   2  -1   81.88    2.72 
   4   2   1   78.35    2.65 
  -4  -2   1   77.66    2.60 
  -4  -2   1   81.61    2.60 
  -4   2  -1   80.36    2.54 
   4   2   1   80.26    2.60 
   4   2   1   80.21    2.62 
   4   2   1   78.01    2.44 
   4   2   1   75.39    2.61 
   4  -2  -1   83.88    2.59 
  -4  -2   1   82.36    2.63 
  -4  -2   1   78.08    2.59 
   4  -2  -1   81.99    2.63 
   4   2   1   84.69    2.63 
   4  -2  -1   83.19    2.51 
  -4   2  -1   78.93    2.33 
  -4  -2   1   80.06    2.56 
   4   2   1   83.47    2.41 
  -4   2  -1   78.10    2.64 
   4  -2  -1   80.94    2.48 
   4   2   1   82.25    2.61 
   4  -2  -1   82.06    2.56 
   4  -2  -1   86.59    2.53 
   4  -2  -1   79.72    2.47 
   4  -2  -1   79.81    2.69 
  -4  -2   1   77.20    2.57 
  -4   2  -1   80.53    2.36 
  -4  -2   1   78.22    2.57 
  -4   2  -1   83.75    2.60 
  -4   2  -1   76.46    2.56 
   4  -2  -1   82.42    2.50 
   5  -2   1   40.99    1.50 
  -5   2   1   41.29    1.34 
   5  -2   1   41.56    1.53 
   5   2  -1   39.61    1.56 
  -5  -2  -1   39.68    1.53 
  -5   2   1   40.00    1.24 
   5   2  -1   41.20    1.30 
  -5   2   1   39.82    1.63 
   5  -2   1   38.42    1.53 
   5   2  -1   39.27    1.50 
  -5  -2  -1   40.85    1.59 
  -5  -2  -1   44.68    1.65 
   5   2  -1   42.43    1.31 
   5   2  -1   41.46    1.63 
   5   2  -1   40.02    1.61 
  -5  -2  -1   42.63    1.63 
   5  -2   1   40.44    1.64 
  -5   2   1   40.28    1.46 
   5  -2   1   40.56    1.54 
  -5  -2  -1   38.49    1.54 
  -5  -2  -1   40.11    1.51 
   5   2  -1   38.41    1.58 
   5  -2   1   38.98    1.57 
   5   2  -1   39.66    1.51 
   5   2  -1   40.83    1.52 
  -5   2   1   42.01    1.49 
  -5   2   1   41.38    1.62 
   5  -2   1   41.24    1.56 
   5  -2   1   42.11    1.52 
  -5  -2  -1   40.18    1.57 
  -5   2  -1   38.45    1.49 
  -5   2  -1   38.02    1.59 
  -5   2  -1   39.11    1.23 
  -5  -2   1   39.47    1.57 
   5   2   1   42.84    1.58 
   5   2   1   41.12    1.59 
   5  -2  -1   40.47    1.59 
   5   2   1   40.72    1.63 
  -5  -2   1   39.34    1.57 
  -5   2  -1   39.74    1.55 
   5  -2  -1   42.19    1.49 
   5   2   1   38.72    1.53 
   5  -2  -1   41.91    1.67 
  -5  -2   1   37.53    1.51 
   5   2   1   40.87    1.60 
  -5   2  -1   37.74    1.51 
  -5  -2   1   40.20    1.53 
  -5   2  -1   41.28    1.66 
  -5   2  -1   39.69    1.29 
   5  -2  -1   40.06    1.43 
  -5  -2   1   38.65    1.55 
   5   2   1   40.64    1.55 
   5   2   1   39.11    1.28 
   5  -2  -1   39.87    1.52 
   5   2   1   40.03    1.39 
  -5  -2   1   39.97    1.56 
   5  -2  -1   39.83    1.45 
   5  -2  -1   41.29    1.47 
   5  -2  -1   41.35    1.52 
  -5  -2   1   39.50    1.52 
  -6  -2  -1    7.11    0.71 
  -6  -2  -1    5.91    0.67 
  -6  -2  -1    6.86    0.65 
   6   2  -1    6.48    0.52 
   6   2  -1    6.50    0.69 
  -6   2   1    5.57    0.63 
   6  -2   1    6.17    0.62 
   6   2  -1    6.58    0.31 
   6  -2   1    7.69    0.69 
   6  -2   1    5.87    0.48 
   6  -2   1    6.87    0.54 
  -6   2   1    6.18    0.59 
   6   2  -1    7.57    0.75 
   6  -2   1    7.27    0.65 
   6   2  -1    6.22    0.36 
  -6   2   1    5.50    0.37 
  -6   2   1    5.34    0.52 
   6   2  -1    7.10    0.68 
   6   2  -1    6.40    0.52 
  -6  -2  -1    6.09    0.64 
  -6  -2  -1    5.68    0.68 
  -6  -2  -1    5.87    0.56 
   6  -2   1    6.09    0.64 
   6  -2   1    5.51    0.65 
   6  -2   1    6.23    0.60 
  -6   2   1    7.08    0.73 
   6   2  -1    7.66    0.78 
  -6  -2  -1    6.51    0.65 
   6  -2  -1    6.95    0.50 
  -6  -2   1    7.20    0.68 
   6   2   1    6.94    0.31 
   6  -2  -1    6.75    0.51 
  -6   2  -1    6.37    0.37 
  -6   2  -1    6.09    0.51 
   6   2   1    7.05    0.44 
  -6  -2   1    6.81    0.64 
  -6   2  -1    6.79    0.74 
   6   2   1    8.45    0.78 
   6  -2  -1    7.06    0.50 
   6   2   1    6.53    0.68 
   6   2   1    7.24    0.68 
  -6  -2   1    7.59    0.60 
  -6  -2   1    6.75    0.52 
  -6   2  -1    8.36    0.78 
   6   2   1    6.49    0.54 
  -6   2  -1    6.96    0.69 
   6  -2  -1    6.32    0.46 
  -6  -2   1    6.59    0.54 
   6   2   1    7.49    0.75 
   6  -2  -1    6.26    0.67 
   6  -2  -1    6.36    0.52 
   6  -2  -1    6.21    0.50 
   6  -2  -1    6.89    0.73 
   6   2   1    7.05    0.56 
  -6  -2   1    6.37    0.66 
  -6   2  -1    6.73    0.55 
  -6  -2   1    6.99    0.57 
  -7  -2  -1   58.55    2.14 
   7   2  -1   61.98    2.34 
   7  -2   1   59.75    2.17 
   7   2  -1   59.06    1.89 
  -7   2   1   56.22    2.30 
   7   2  -1   57.17    2.14 
  -7  -2  -1   60.56    2.33 
  -7   2   1   60.53    1.95 
   7  -2   1   57.38    2.16 
   7  -2   1   54.92    2.31 
   7  -2   1   58.40    2.23 
   7  -2   1   57.62    2.27 
  -7  -2  -1   59.76    2.28 
  -7  -2  -1   57.44    2.30 
   7   2  -1   56.87    2.28 
   7  -2   1   56.81    2.13 
  -7  -2  -1   58.24    2.23 
   7   2  -1   58.40    2.33 
  -7  -2  -1   57.46    2.22 
  -7   2   1   56.95    2.11 
   7   2  -1   56.48    2.14 
  -7   2   1   58.86    2.35 
   7   2   1   58.88    1.99 
  -7  -2   1   57.58    2.27 
   7  -2  -1   58.85    2.28 
  -7   2  -1   58.22    2.31 
  -7  -2   1   58.13    2.20 
   7   2   1   56.64    2.28 
  -7  -2   1   59.51    2.28 
  -7   2  -1   57.43    1.90 
  -7  -2   1   57.86    2.15 
   7  -2  -1   59.20    2.38 
   7  -2  -1   54.27    2.05 
  -7   2  -1   58.70    2.17 
  -7  -2   1   58.25    2.26 
  -7   2  -1   56.28    2.34 
   7  -2  -1   59.84    2.14 
   7  -2  -1   59.66    2.23 
   7   2   1   57.29    2.28 
   7   2   1   56.00    2.19 
   7   2   1   54.64    2.28 
   7  -2  -1   57.25    2.10 
   7   2   1   57.25    2.19 
   8  -2   1    2.50    0.53 
   8   2  -1    2.69    0.49 
  -8  -2  -1    1.64    0.42 
  -8   2   1    1.69    0.45 
   8   2  -1    2.45    0.53 
  -8   2   1    2.86    0.47 
  -8   2   1    2.82    0.36 
  -8  -2  -1    2.38    0.42 
   8   2  -1    3.76    0.64 
   8   2  -1    2.13    0.44 
   8  -2   1    2.63    0.53 
  -8   2   1    1.49    0.43 
   8  -2   1    1.89    0.40 
   8  -2   1    2.10    0.45 
  -8  -2  -1    2.19    0.46 
  -8  -2  -1    2.76    0.51 
  -8  -2  -1    1.99    0.43 
   8  -2   1    2.92    0.47 
   8   2  -1    2.29    0.50 
   8  -2   1    2.46    0.45 
  -8  -2   1    2.67    0.54 
  -8  -2   1    3.11    0.52 
   8   2   1    1.78    0.44 
   8  -2  -1    2.63    0.43 
   8   2   1    3.53    0.55 
   8  -2  -1    3.64    0.54 
  -8  -2   1    2.95    0.55 
  -8   2  -1    2.86    0.55 
   8  -2  -1    2.60    0.44 
  -8  -2   1    2.77    0.50 
   8   2   1    4.44    0.67 
   8   2   1    2.84    0.55 
  -8   2  -1    2.59    0.47 
   8   2   1    2.58    0.46 
   8  -2  -1    2.13    0.38 
   8  -2  -1    2.65    0.57 
  -8  -2   1    2.98    0.47 
   8  -2  -1    2.77    0.52 
  -8   2  -1    3.24    0.58 
   9  -2   1   48.33    2.00 
   9  -2   1   48.86    2.27 
   9  -2   1   50.49    2.21 
   9   2  -1   49.34    2.22 
   9   2  -1   51.00    2.23 
   9   2  -1   47.81    2.23 
  -9   2   1   50.54    2.28 
   9  -2   1   50.26    2.03 
  -9  -2  -1   47.92    2.17 
   9  -2   1   45.91    2.09 
   9  -2   1   48.90    2.04 
  -9   2   1   45.73    2.18 
  -9  -2  -1   47.23    2.11 
  -9  -2  -1   53.15    2.19 
   9   2  -1   48.86    2.04 
   9   2  -1   46.72    2.00 
  -9  -2  -1   50.71    2.00 
  -9   2   1   49.59    2.04 
  -9  -2  -1   49.21    2.22 
  -9   2  -1   46.35    2.23 
   9   2   1   45.62    2.05 
   9   2   1   43.70    2.13 
   9  -2  -1   51.93    2.34 
  -9  -2   1   49.59    2.02 
   9   2   1   50.11    2.24 
   9  -2  -1   48.17    2.12 
   9   2   1   46.62    2.05 
  -9  -2   1   53.25    2.24 
  -9  -2   1   50.02    2.11 
  -9   2  -1   47.09    2.05 
  -9  -2   1   47.52    2.19 
   9  -2  -1   50.44    2.21 
  -9  -2   1   48.87    2.16 
   9  -2  -1   47.89    1.96 
  -9   2  -1   49.49    2.24 
   9  -2  -1   49.51    1.95 
   9   2   1   46.87    2.20 
   9  -2  -1   48.81    1.97 
  10  -2   1    1.63    0.44 
 -10  -2  -1    1.25    0.46 
  10   2  -1    1.76    0.57 
  10  -2   1    1.75    0.52 
  10  -2   1    1.76    0.46 
  10   2  -1    1.90    0.47 
  10   2  -1    1.27    0.45 
 -10   2   1    1.08    0.43 
 -10   2   1    1.81    0.56 
 -10  -2  -1    1.19    0.36 
 -10  -2  -1    2.27    0.54 
  10  -2   1    1.35    0.40 
  10   2  -1    1.57    0.49 
  10  -2   1    1.50    0.43 
  10   2  -1    1.43    0.42 
  10  -2   1    0.98    0.41 
 -10  -2  -1    1.58    0.47 
 -10  -2  -1    1.44    0.49 
 -10   2   1    0.92    0.39 
 -10  -2   1    1.73    0.50 
  10  -2  -1    2.57    0.64 
 -10  -2   1    1.51    0.46 
 -10  -2   1    2.75    0.62 
  10   2   1    1.47    0.48 
 -10  -2   1    2.45    0.49 
 -10   2  -1    1.57    0.50 
  10  -2  -1    2.41    0.56 
  10   2   1    1.77    0.48 
  10   2   1    1.77    0.54 
  10  -2  -1    1.16    0.45 
  10   2   1    1.47    0.43 
  10  -2  -1    2.23    0.45 
  10  -2  -1    1.79    0.44 
  10  -2  -1    1.30    0.37 
 -10   2  -1    2.07    0.51 
  10   2   1    2.61    0.62 
 -10   2  -1    2.28    0.60 
 -10  -2   1    1.58    0.51 
 -11  -2  -1   18.67    1.28 
 -11   2   1   19.47    1.42 
  11   2  -1   18.75    1.42 
  11  -2   1   17.54    1.16 
  11  -2   1   16.54    1.14 
  11  -2   1   17.11    1.27 
  11   2  -1   18.94    1.37 
 -11   2   1   18.13    1.23 
 -11  -2  -1   17.62    1.32 
 -11  -2  -1   18.96    1.32 
  11  -2   1   18.75    1.31 
 -11  -2  -1   19.77    1.39 
  11   2  -1   18.83    1.22 
  11   2  -1   18.38    1.19 
  11  -2   1   17.30    1.19 
  11   2  -1   19.20    1.38 
  11  -2   1   16.77    1.37 
 -11   2   1   16.49    1.31 
  11   2   1   17.21    1.33 
  11  -2  -1   17.79    1.11 
  11  -2  -1   20.05    1.15 
  11   2   1   20.47    1.29 
  11  -2  -1   17.31    1.26 
  11  -2  -1   18.95    1.34 
 -11  -2   1   19.67    1.35 
 -11  -2   1   18.31    1.33 
  11   2   1   18.17    1.36 
 -11   2  -1   19.29    1.39 
  11   2   1   17.95    1.32 
  11   2   1   19.69    1.28 
 -11  -2   1   20.11    1.33 
 -11  -2   1   19.41    1.34 
 -11   2  -1   19.01    1.41 
  11  -2  -1   18.53    1.40 
 -11   2  -1   20.92    1.33 
  11  -2  -1   16.85    1.13 
 -12  -2  -1    2.97    0.69 
  12   2  -1    2.95    0.63 
  12   2  -1    3.12    0.69 
  12  -2   1    2.89    0.78 
  12   2  -1    3.25    0.63 
 -12  -2  -1    1.85    0.63 
  12  -2   1    3.03    0.66 
  12   2  -1    3.05    0.71 
  12  -2   1    3.55    0.79 
 -12   2   1    3.29    0.74 
  12  -2   1    2.88    0.60 
  12   2  -1    2.69    0.73 
 -12  -2  -1    3.37    0.73 
 -12  -2  -1    2.93    0.71 
 -12   2   1    2.76    0.71 
 -12   2   1    3.28    0.69 
  12  -2   1    3.04    0.70 
  12  -2   1    3.49    0.62 
 -12   2   1    1.77    0.61 
 -12  -2   1    3.64    0.75 
 -12  -2   1    2.75    0.70 
  12  -2  -1    2.58    0.67 
 -12  -2   1    2.69    0.65 
 -12   2  -1    2.95    0.70 
  12  -2  -1    3.44    0.60 
 -12   2  -1    2.39    0.64 
  12   2   1    2.03    0.56 
  12  -2  -1    2.54    0.58 
  12  -2  -1    2.08    0.65 
  12   2   1    2.15    0.55 
 -12   2  -1    3.66    0.79 
 -12  -2   1    2.66    0.71 
  12  -2  -1    2.95    0.57 
  12   2   1    3.71    0.79 
  12   2   1    4.14    0.83 
  12   2   1    2.73    0.69 
 -12   2  -1    3.62    0.78 
  12  -2  -1    4.08    0.74 
 -13  -2  -1   14.90    1.56 
  13  -2   1   13.39    1.32 
  13  -2   1   12.19    1.37 
  13   2  -1   12.61    1.29 
  13   2  -1   11.68    1.42 
 -13  -2  -1   13.83    1.55 
  13  -2   1   14.27    1.67 
 -13   2   1   13.07    1.55 
  13   2  -1   14.33    1.14 
  13  -2   1   13.70    1.49 
 -13   2   1   13.81    1.58 
 -13  -2  -1   11.64    1.46 
 -13  -2  -1   14.36    1.58 
  13  -2   1   13.86    1.10 
  13   2  -1   14.86    1.61 
 -13   2   1   14.44    1.47 
 -13   2   1   15.64    1.67 
 -13   2  -1   16.03    1.72 
  13  -2  -1   14.39    1.55 
 -13   2  -1   15.09    1.62 
  13  -2  -1   14.52    1.70 
  13   2   1   14.91    1.63 
 -13  -2   1   16.23    1.63 
  13  -2  -1   15.40    1.50 
 -13   2  -1   13.47    1.53 
 -13  -2   1   13.00    1.46 
  13   2   1   13.21    1.36 
  13   2   1   13.94    1.62 
 -13  -2   1   17.31    1.68 
 -13  -2   1   15.46    1.64 
  13   2   1   15.42    1.63 
  13  -2  -1   13.90    1.04 
 -13   2  -1   16.53    1.58 
  13   2   1   15.53    1.47 
  13  -2  -1   15.11    1.12 
 -14   2   1    0.66    0.47 
  14  -2   1    0.62    0.37 
 -14   2   1   -0.15    0.36 
  14  -2   1    0.24    0.45 
  14   2  -1    0.11    0.35 
  14  -2   1    0.38    0.39 
 -14  -2  -1    0.19    0.40 
 -14  -2  -1    0.62    0.44 
  14   2  -1    0.53    0.36 
 -14  -2  -1    0.33    0.50 
  14   2  -1    0.49    0.49 
  14   2  -1    0.45    0.34 
 -14  -2  -1   -0.24    0.34 
 -14   2   1    0.62    0.38 
 -14   2   1    0.41    0.44 
  14  -2   1    0.46    0.54 
  14  -2   1    0.37    0.43 
 -14   2  -1    1.09    0.51 
  14   2   1    0.00    0.38 
 -14  -2   1    0.55    0.48 
  14   2   1    0.53    0.45 
  14  -2  -1    0.22    0.38 
  14   2   1    0.61    0.41 
 -14  -2   1    0.58    0.48 
 -14  -2   1    0.09    0.45 
 -14   2  -1    0.91    0.58 
 -14  -2   1    0.79    0.51 
 -14   2  -1    0.11    0.45 
  14  -2  -1    0.79    0.51 
  14  -2  -1    0.67    0.39 
 -14   2  -1   -0.41    0.41 
  14  -2  -1    0.04    0.26 
  14  -2  -1    0.32    0.40 
   0   3  -1    4.82    0.32 
   0  -3   1    4.94    0.33 
   0   3   1    5.26    0.22 
   0   3  -1    4.79    0.30 
   0   3   1    4.44    0.33 
   0  -3   1    4.81    0.29 
   0  -3  -1    5.29    0.28 
   0  -3  -1    5.16    0.29 
   0  -3   1    4.99    0.28 
   0   3  -1    4.65    0.22 
   0  -3  -1    4.52    0.32 
   0  -3   1    4.59    0.31 
   0  -3  -1    5.02    0.31 
   0  -3   1    4.92    0.29 
   0   3   1    4.79    0.22 
   0   3  -1    4.86    0.33 
   0   3   1    4.67    0.28 
   0  -3  -1    4.66    0.30 
   0  -3   1    4.45    0.28 
   0  -3  -1    4.86    0.32 
   0   3   1    5.11    0.35 
   0   3  -1    4.62    0.29 
   0  -3  -1    4.88    0.30 
   0  -3  -1    4.93    0.28 
   0  -3  -1    4.55    0.27 
   0   3  -1    4.89    0.29 
   0  -3   1    4.52    0.30 
   0   3   1    5.26    0.29 
   0   3  -1    4.39    0.33 
   0   3   1    4.70    0.27 
   0   3   1    4.93    0.29 
   1   3  -1   42.74    1.45 
  -1   3   1   44.59    1.43 
  -1   3   1   46.06    1.35 
  -1   3   1   45.81    1.35 
  -1  -3  -1   46.88    1.45 
   1   3  -1   45.88    1.34 
   1  -3   1   44.93    1.39 
   1  -3   1   45.90    1.40 
   1  -3   1   44.09    1.44 
   1  -3   1   44.77    1.30 
  -1  -3  -1   45.32    1.42 
   1  -3   1   47.16    1.40 
  -1  -3  -1   46.10    1.41 
   1   3  -1   45.03    1.36 
   1  -3   1   43.06    1.25 
   1  -3   1   46.65    1.48 
   1  -3   1   45.57    1.36 
  -1   3   1   44.81    1.34 
   1   3  -1   43.12    1.41 
  -1   3   1   43.83    1.32 
   1   3  -1   46.89    1.42 
  -1  -3  -1   44.36    1.40 
   1   3  -1   44.01    1.39 
  -1   3   1   43.80    1.44 
  -1  -3  -1   43.81    1.38 
  -1  -3  -1   43.93    1.42 
   1   3  -1   46.53    1.41 
  -1  -3  -1   44.90    1.39 
   1  -3   1   45.20    1.41 
   1   3   1   38.13    1.42 
  -1   3  -1   40.95    1.38 
   1  -3  -1   40.42    1.33 
  -1  -3   1   41.57    1.41 
  -1   3  -1   40.30    1.39 
   1   3   1   41.29    1.42 
   1   3   1   40.70    1.35 
  -1  -3   1   39.22    1.41 
   1  -3  -1   41.65    1.40 
  -1  -3   1   39.58    1.34 
   1   3   1   42.42    1.39 
   1  -3  -1   39.79    1.41 
   1   3   1   41.09    1.39 
   1  -3  -1   41.44    1.23 
  -1   3  -1   40.60    1.40 
   1   3   1   41.67    1.39 
   1  -3  -1   41.49    1.41 
  -1  -3   1   42.27    1.39 
   1   3   1   41.08    1.26 
  -1   3  -1   39.29    1.35 
  -1   3  -1   39.01    1.42 
  -1  -3   1   41.54    1.34 
   1  -3  -1   38.95    1.43 
  -1  -3   1   41.74    1.43 
   1  -3  -1   41.24    1.34 
   1  -3  -1   41.11    1.32 
   1  -3  -1   39.58    1.33 
  -1  -3   1   41.16    1.39 
   1  -3  -1   40.15    1.31 
  -1   3  -1   41.17    1.38 
  -1   3  -1   40.88    1.37 
  -1   3  -1   42.50    1.39 
   2  -3   1  341.60    9.63 
   2   3  -1  335.77    9.68 
  -2   3   1  338.35    9.73 
  -2  -3  -1  337.89    9.80 
   2  -3   1  324.92    9.72 
   2  -3   1  338.39    9.75 
   2  -3   1  339.69    9.71 
   2  -3   1  340.21    9.52 
  -2   3   1  341.79    9.73 
   2   3  -1  341.36    9.74 
  -2   3   1  335.06    9.62 
  -2  -3  -1  334.65    9.71 
   2   3  -1  331.60    9.72 
   2  -3   1  326.10    9.73 
  -2  -3  -1  334.16    9.66 
  -2  -3  -1  345.35    9.79 
  -2   3   1  344.14    9.63 
   2   3  -1  341.26    9.75 
   2   3  -1  338.47    9.76 
   2  -3   1  339.84    9.71 
  -2  -3  -1  345.48    9.66 
   2  -3   1  338.11    9.67 
  -2  -3  -1  339.75    9.75 
   2   3  -1  316.65    9.73 
   2  -3   1  321.14    9.71 
   2  -3   1  341.82    9.81 
  -2  -3  -1  331.27    9.76 
  -2   3   1  340.68    9.81 
   2  -3   1  331.39    9.82 
  -2  -3  -1  340.91    9.76 
  -2  -3   1  342.24    9.74 
   2   3   1  347.23    9.78 
  -2   3  -1  343.06    9.73 
  -2   3  -1  341.01    9.74 
   2   3   1  342.41    9.77 
  -2   3  -1  344.55    9.81 
   2  -3  -1  352.74    9.65 
  -2  -3   1  337.74    9.76 
   2  -3  -1  331.41    9.80 
   2  -3  -1  346.91    9.58 
   2  -3  -1  351.37    9.66 
   2  -3  -1  353.46    9.65 
  -2  -3   1  339.71    9.69 
   2  -3  -1  366.92    9.65 
   2  -3  -1  345.65    9.76 
   2  -3  -1  345.60    9.76 
   2   3   1  346.37    9.67 
  -2  -3   1  359.60    9.60 
   2   3   1  354.52    9.65 
  -2   3  -1  355.85    9.75 
   2   3   1  356.56    9.77 
  -2  -3   1  340.24    9.79 
   2   3   1  336.78    9.75 
  -2  -3   1  337.14    9.74 
  -2   3  -1  338.51    9.72 
   2   3   1  340.94    9.75 
   2  -3  -1  356.28    9.65 
   2  -3  -1  342.70    9.82 
  -2  -3   1  346.61    9.80 
   2   3   1  348.44    9.76 
   2  -3  -1  357.76    9.61 
  -2   3  -1  333.92    9.69 
   3  -3   1  115.18    3.26 
   3  -3   1  103.33    3.19 
  -3   3   1  104.86    3.16 
  -3  -3  -1  108.46    3.30 
  -3  -3  -1  107.57    3.31 
  -3   3   1  106.50    3.05 
  -3  -3  -1  103.09    3.30 
   3   3  -1  110.10    3.06 
  -3  -3  -1  107.37    3.36 
   3  -3   1  108.79    3.24 
   3  -3   1  109.58    3.27 
   3  -3   1  103.83    3.35 
   3   3  -1  109.25    3.32 
  -3  -3  -1  107.35    3.24 
   3  -3   1  107.91    3.37 
  -3   3   1  107.11    3.16 
  -3   3   1  103.82    3.29 
   3   3  -1  108.22    3.28 
  -3  -3  -1  107.88    3.32 
  -3   3   1  105.18    3.36 
   3   3  -1  109.19    3.25 
  -3  -3  -1  106.33    3.22 
   3   3  -1  106.67    3.23 
   3   3  -1  108.45    3.29 
   3  -3   1  104.72    3.28 
   3   3  -1  106.97    3.31 
   3   3  -1  110.06    3.27 
   3  -3   1  108.13    3.25 
  -3   3   1  103.47    3.19 
   3  -3  -1  102.80    3.29 
   3   3   1  105.07    3.22 
  -3   3  -1  106.35    3.31 
  -3   3  -1  104.78    3.22 
   3   3   1  109.01    3.16 
  -3   3  -1  101.39    3.35 
   3  -3  -1  104.27    3.29 
  -3  -3   1  106.33    3.32 
   3   3   1  105.34    3.32 
  -3   3  -1  101.84    3.23 
   3  -3  -1  108.45    3.06 
  -3   3  -1  106.77    3.27 
   3  -3  -1  104.16    3.16 
   3  -3  -1  110.69    3.18 
  -3   3  -1  100.09    3.24 
  -3  -3   1  105.10    3.24 
  -3  -3   1  105.47    3.27 
  -3  -3   1  106.55    3.28 
   3  -3  -1  105.53    3.33 
  -3   3  -1  106.31    3.20 
   3   3   1  105.41    3.21 
   3   3   1  108.87    3.30 
   3   3   1  106.93    3.33 
  -3  -3   1  103.74    3.28 
   3  -3  -1  105.35    3.37 
   3  -3  -1  107.54    3.19 
   3   3   1  105.00    3.29 
   3  -3  -1  102.07    3.16 
  -3  -3   1  110.53    3.35 
   3  -3  -1  103.88    3.17 
  -4   3   1   50.59    1.55 
  -4  -3  -1   51.24    1.84 
   4   3  -1   52.68    1.56 
  -4  -3  -1   51.15    1.85 
   4   3  -1   53.71    1.82 
  -4   3   1   52.87    1.92 
  -4  -3  -1   49.43    1.78 
   4  -3   1   53.25    1.79 
   4   3  -1   52.82    1.71 
  -4  -3  -1   50.56    1.83 
   4   3  -1   52.67    1.87 
   4  -3   1   52.13    1.77 
   4  -3   1   54.72    1.82 
  -4  -3  -1   51.86    1.90 
   4  -3   1   52.93    1.84 
   4   3  -1   52.89    1.81 
  -4  -3  -1   50.44    1.78 
   4   3  -1   54.92    1.84 
   4  -3   1   52.33    1.92 
  -4   3   1   49.78    1.70 
  -4  -3  -1   49.44    1.83 
  -4   3   1   51.26    1.85 
   4   3  -1   51.41    1.87 
  -4   3   1   50.47    1.71 
   4  -3   1   53.69    1.90 
   4  -3   1   55.20    1.79 
   4   3  -1   51.75    1.81 
  -4   3   1   50.88    1.66 
   4   3   1   52.23    1.90 
   4  -3  -1   54.66    1.74 
  -4  -3   1   51.07    1.80 
   4   3   1   49.70    1.82 
  -4  -3   1   51.18    1.82 
  -4  -3   1   51.61    1.82 
   4   3   1   50.32    1.70 
   4  -3  -1   49.97    1.92 
   4   3   1   50.14    1.66 
   4  -3  -1   51.13    1.71 
  -4   3  -1   50.74    1.75 
   4   3   1   51.25    1.86 
   4  -3  -1   51.35    1.84 
   4   3   1   52.85    1.79 
  -4  -3   1   50.86    1.87 
  -4   3  -1   48.74    1.87 
  -4   3  -1   49.26    1.80 
  -4  -3   1   51.04    1.81 
  -4   3  -1   52.00    1.87 
   4  -3  -1   52.73    1.71 
   4   3   1   53.56    1.87 
  -4   3  -1   50.80    1.92 
  -4  -3   1   52.97    1.85 
  -4   3  -1   51.81    1.67 
  -4  -3   1   49.78    1.81 
   4  -3  -1   52.13    1.86 
  -4   3  -1   52.55    1.81 
   4  -3  -1   52.11    1.70 
  -5  -3  -1    1.94    0.36 
   5  -3   1    1.72    0.32 
  -5   3   1    3.27    0.48 
   5  -3   1    2.38    0.38 
  -5  -3  -1    1.85    0.33 
   5   3  -1    1.59    0.29 
   5   3  -1    1.60    0.31 
  -5  -3  -1    2.31    0.38 
   5  -3   1    1.37    0.33 
  -5   3   1    1.85    0.22 
   5  -3   1    1.90    0.31 
  -5  -3  -1    1.65    0.32 
   5   3  -1    1.84    0.18 
   5  -3   1    0.94    0.27 
   5   3  -1    1.65    0.30 
  -5   3   1    1.68    0.35 
   5  -3   1    2.04    0.31 
   5  -3   1    1.46    0.27 
  -5  -3  -1    1.36    0.29 
  -5   3   1    1.84    0.29 
  -5  -3  -1    2.05    0.40 
  -5   3   1    2.12    0.31 
   5   3  -1    1.65    0.23 
  -5   3   1    2.11    0.20 
   5   3  -1    1.43    0.31 
  -5  -3  -1    1.80    0.32 
   5  -3   1    1.76    0.30 
   5   3  -1    1.65    0.34 
   5   3  -1    1.93    0.33 
   5   3   1    1.60    0.31 
  -5   3  -1    1.37    0.28 
  -5  -3   1    1.59    0.32 
  -5  -3   1    1.67    0.31 
   5  -3  -1    1.75    0.28 
  -5   3  -1    2.02    0.22 
  -5   3  -1    1.78    0.32 
   5   3   1    2.20    0.39 
  -5  -3   1    1.63    0.30 
   5   3   1    2.19    0.26 
  -5   3  -1    1.56    0.13 
   5  -3  -1    2.12    0.30 
   5  -3  -1    2.50    0.34 
   5   3   1    2.24    0.39 
  -5  -3   1    2.19    0.38 
   5  -3  -1    1.56    0.32 
  -5  -3   1    1.62    0.34 
   5  -3  -1    1.81    0.26 
  -5   3  -1    1.87    0.36 
   5  -3  -1    1.32    0.34 
  -5  -3   1    2.07    0.33 
   5   3   1    1.96    0.26 
   5   3   1    1.57    0.34 
   5  -3  -1    1.39    0.30 
  -5   3  -1    1.61    0.36 
  -5  -3   1    1.76    0.31 
   5  -3  -1    2.16    0.33 
   5   3   1    1.63    0.33 
   5   3   1    1.51    0.30 
  -6  -3  -1   19.51    1.01 
  -6  -3  -1   20.08    1.03 
  -6  -3  -1   18.88    1.02 
   6   3  -1   21.16    1.00 
  -6  -3  -1   18.25    0.96 
   6  -3   1   20.09    0.99 
  -6   3   1   20.36    1.12 
   6   3  -1   19.03    1.04 
  -6   3   1   19.18    0.70 
   6   3  -1   20.42    1.09 
  -6   3   1   18.36    1.03 
   6   3  -1   19.05    0.97 
   6  -3   1   20.62    0.95 
   6  -3   1   19.31    1.01 
   6   3  -1   21.08    0.78 
  -6  -3  -1   20.06    1.05 
   6   3  -1   19.21    1.05 
   6   3  -1   20.07    1.01 
  -6   3   1   18.91    0.93 
   6  -3   1   19.27    1.09 
   6  -3   1   20.19    0.95 
  -6  -3  -1   18.92    0.97 
  -6  -3  -1   19.87    1.09 
  -6   3   1   19.84    0.74 
   6  -3   1   21.04    1.00 
   6  -3   1   19.60    1.03 
   6  -3   1   19.47    0.95 
   6  -3   1   20.19    0.97 
  -6   3   1   18.47    0.90 
   6   3  -1   19.03    0.97 
   6   3  -1   20.49    0.72 
  -6   3  -1   18.35    0.69 
   6   3   1   19.25    0.76 
  -6  -3   1   17.71    0.97 
  -6   3  -1   18.25    1.07 
  -6  -3   1   18.10    0.97 
  -6  -3   1   18.88    1.01 
   6  -3  -1   18.21    1.00 
   6  -3  -1   18.14    0.89 
   6  -3  -1   19.20    0.96 
   6  -3  -1   17.10    1.07 
   6  -3  -1   20.32    0.92 
  -6   3  -1   18.53    0.94 
  -6  -3   1   18.22    1.03 
   6   3   1   17.90    0.98 
  -6   3  -1   19.16    1.06 
  -6   3  -1   17.92    0.68 
   6   3   1   17.98    1.00 
   6  -3  -1   17.90    0.87 
   6   3   1   18.38    0.99 
   6   3   1   17.62    1.01 
   6   3   1   19.03    1.01 
   6   3   1   19.09    1.06 
  -6  -3   1   18.43    0.99 
   6  -3  -1   19.10    0.98 
   6  -3  -1   20.25    0.93 
  -6  -3   1   19.07    1.01 
   6   3   1   19.22    0.81 
  -6  -3   1   19.71    1.00 
   7  -3   1   17.72    0.99 
   7   3  -1   16.43    1.04 
  -7  -3  -1   17.11    0.96 
   7  -3   1   16.56    0.93 
   7  -3   1   17.70    0.98 
  -7   3   1   17.41    0.71 
   7  -3   1   15.37    0.88 
  -7  -3  -1   17.46    1.02 
  -7  -3  -1   16.61    1.01 
  -7  -3  -1   16.44    0.99 
  -7   3   1   17.16    1.05 
  -7   3   1   16.57    0.90 
  -7   3   1   16.99    1.07 
  -7  -3  -1   18.69    1.10 
   7   3  -1   15.48    1.00 
   7  -3   1   16.44    1.06 
   7  -3   1   16.09    0.99 
   7  -3   1   16.64    0.91 
   7   3  -1   17.14    1.04 
   7   3  -1   17.29    0.96 
  -7  -3  -1   16.94    0.97 
   7   3  -1   16.59    0.98 
   7   3  -1   17.33    0.96 
   7  -3  -1   16.33    1.01 
   7  -3  -1   14.64    0.83 
   7   3   1   18.38    1.01 
   7   3   1   17.49    0.77 
   7   3   1   16.47    1.03 
  -7  -3   1   17.81    1.02 
   7  -3  -1   16.73    0.89 
  -7   3  -1   16.77    1.08 
  -7   3  -1   18.01    0.68 
   7  -3  -1   15.87    0.85 
  -7  -3   1   16.78    0.98 
   7  -3  -1   17.43    0.96 
   7  -3  -1   17.29    0.95 
  -7   3  -1   15.86    1.02 
   7   3   1   16.85    0.97 
  -7  -3   1   16.69    0.95 
   7  -3  -1   15.56    1.05 
   7   3   1   17.73    1.05 
   7   3   1   17.55    1.05 
  -7  -3   1   17.88    1.00 
  -7  -3   1   16.37    1.00 
  -7   3  -1   18.95    0.98 
  -8   3   1    1.42    0.45 
   8  -3   1    1.48    0.44 
  -8  -3  -1    1.57    0.38 
   8  -3   1    1.35    0.34 
   8   3  -1    2.01    0.49 
  -8   3   1    1.44    0.42 
  -8  -3  -1    2.26    0.44 
   8   3  -1    1.11    0.39 
  -8  -3  -1    1.32    0.39 
   8  -3   1    2.16    0.47 
   8  -3   1    1.29    0.38 
   8  -3   1    1.71    0.38 
   8  -3   1    1.93    0.38 
  -8   3   1    1.62    0.36 
   8  -3   1    1.20    0.36 
   8   3  -1    1.44    0.40 
   8   3  -1    1.33    0.36 
  -8  -3  -1    1.41    0.40 
   8   3  -1    1.90    0.45 
  -8  -3  -1    1.62    0.43 
   8  -3  -1    1.51    0.36 
   8  -3  -1    1.62    0.37 
  -8   3  -1    0.74    0.36 
  -8   3  -1    1.52    0.43 
   8   3   1    1.68    0.44 
  -8  -3   1    1.10    0.37 
   8  -3  -1    1.31    0.30 
  -8  -3   1    1.60    0.41 
   8  -3  -1    1.38    0.44 
   8   3   1    1.57    0.40 
  -8  -3   1    1.37    0.34 
   8   3   1    1.81    0.45 
   8   3   1    1.72    0.42 
   8  -3  -1    1.51    0.39 
  -8  -3   1    1.35    0.38 
  -8  -3   1    1.76    0.43 
  -8   3  -1    1.48    0.39 
   8  -3  -1    2.09    0.47 
   8  -3  -1    1.64    0.33 
   8   3   1    1.49    0.43 
  -9  -3  -1    0.61    0.34 
   9  -3   1    0.24    0.26 
  -9  -3  -1    0.06    0.21 
   9   3  -1    0.15    0.31 
  -9   3   1    0.09    0.30 
   9  -3   1    0.59    0.33 
  -9  -3  -1    0.11    0.28 
   9   3  -1   -0.10    0.22 
   9  -3   1    0.75    0.33 
   9  -3   1    0.19    0.26 
   9   3  -1    0.55    0.37 
  -9  -3  -1    0.54    0.30 
   9  -3   1    1.03    0.32 
   9  -3   1    0.58    0.28 
   9   3  -1    1.02    0.38 
   9  -3   1    0.78    0.35 
  -9   3   1    0.78    0.32 
  -9  -3  -1    0.13    0.25 
  -9   3   1    0.34    0.33 
   9   3  -1    0.31    0.27 
   9   3   1    0.44    0.32 
  -9  -3   1    0.37    0.32 
   9   3   1    0.55    0.29 
  -9   3  -1   -0.02    0.28 
  -9   3  -1    0.79    0.37 
   9  -3  -1    0.48    0.28 
   9  -3  -1    0.87    0.30 
   9  -3  -1   -0.04    0.26 
  -9  -3   1    0.23    0.26 
   9  -3  -1   -0.04    0.23 
   9   3   1    0.17    0.26 
  -9  -3   1    0.25    0.28 
  -9  -3   1    0.13    0.30 
  -9  -3   1    0.35    0.29 
   9   3   1    0.17    0.26 
   9  -3  -1    0.51    0.25 
   9  -3  -1    0.54    0.32 
  -9   3  -1    0.13    0.27 
   9   3   1    0.06    0.28 
  10   3  -1   -0.07    0.30 
 -10  -3  -1    0.62    0.31 
  10  -3   1    0.79    0.39 
  10  -3   1    0.37    0.32 
 -10  -3  -1    0.95    0.41 
  10   3  -1    1.05    0.45 
  10   3  -1    0.86    0.44 
 -10  -3  -1    0.56    0.32 
 -10   3   1    1.07    0.39 
 -10   3   1    0.47    0.37 
  10   3  -1    0.71    0.33 
  10  -3   1    0.40    0.32 
  10  -3   1    0.44    0.30 
  10  -3   1    0.45    0.35 
 -10  -3  -1    0.57    0.38 
  10   3  -1    0.56    0.32 
 -10  -3  -1    1.52    0.51 
  10  -3   1    0.79    0.34 
 -10   3   1    0.60    0.37 
  10   3   1    1.00    0.40 
  10   3   1    1.45    0.45 
 -10   3  -1    0.35    0.34 
  10   3   1    1.41    0.48 
 -10   3  -1    0.71    0.39 
  10  -3  -1    1.07    0.40 
 -10  -3   1    0.84    0.38 
 -10  -3   1    0.80    0.35 
 -10  -3   1    0.24    0.34 
  10  -3  -1    0.49    0.28 
  10   3   1    0.40    0.35 
  10   3   1    0.97    0.42 
  10  -3  -1    0.94    0.37 
 -10   3  -1    1.26    0.51 
  10  -3  -1    1.06    0.47 
  10  -3  -1    1.40    0.37 
 -10  -3   1    1.11    0.43 
 -10  -3   1   -0.15    0.31 
 -11   3   1    0.71    0.41 
 -11  -3  -1    0.64    0.45 
 -11   3   1    0.38    0.34 
 -11  -3  -1    1.55    0.50 
  11   3  -1    0.96    0.40 
 -11  -3  -1    0.64    0.43 
  11  -3   1    0.76    0.37 
 -11   3   1    0.55    0.44 
  11   3  -1    0.72    0.38 
  11  -3   1    0.50    0.38 
  11  -3   1    0.46    0.35 
 -11  -3  -1    0.71    0.38 
  11   3  -1    0.46    0.36 
  11  -3   1    0.62    0.38 
  11   3  -1    0.09    0.34 
  11  -3   1    0.76    0.33 
 -11  -3   1    1.24    0.48 
  11  -3  -1    0.82    0.36 
  11  -3  -1    0.73    0.41 
  11  -3  -1    0.94    0.47 
  11   3   1    1.29    0.51 
 -11   3  -1    1.05    0.47 
  11   3   1    0.83    0.40 
  11  -3  -1    0.54    0.38 
  11  -3  -1    1.01    0.35 
  11   3   1    1.41    0.48 
 -11   3  -1    2.12    0.61 
 -11   3  -1    1.03    0.45 
  11   3   1    1.44    0.48 
 -11  -3   1    0.29    0.34 
 -11  -3   1    1.39    0.41 
 -11  -3   1    1.04    0.45 
 -11  -3   1    1.04    0.48 
  11   3   1    0.56    0.40 
 -12  -3  -1    3.55    0.79 
 -12  -3  -1    5.32    0.91 
  12   3  -1    2.61    0.61 
 -12   3   1    4.09    0.85 
  12   3  -1    4.39    0.83 
 -12   3   1    3.31    0.84 
  12  -3   1    3.33    0.71 
  12  -3   1    4.05    0.72 
  12  -3   1    3.49    0.66 
  12  -3   1    3.07    0.72 
  12   3  -1    3.34    0.67 
 -12  -3  -1    3.51    0.83 
  12   3  -1    2.95    0.74 
 -12   3   1    4.12    0.75 
 -12  -3  -1    4.05    0.80 
  12  -3   1    4.32    0.90 
 -12  -3   1    3.98    0.78 
 -12  -3   1    3.52    0.72 
  12  -3  -1    3.81    0.78 
  12  -3  -1    3.57    0.81 
 -12  -3   1    5.68    0.98 
  12   3   1    3.58    0.69 
  12   3   1    5.37    0.94 
  12   3   1    5.45    0.97 
  12  -3  -1    4.81    0.75 
  12  -3  -1    4.26    0.66 
 -12   3  -1    3.97    0.82 
 -12  -3   1    4.70    0.86 
  12  -3  -1    3.94    0.75 
  12   3   1    3.44    0.69 
 -12   3  -1    4.01    0.86 
 -12   3  -1    4.50    0.80 
 -13   3   1   -0.01    0.43 
  13  -3   1    0.85    0.50 
 -13  -3  -1    0.84    0.51 
  13   3  -1    0.49    0.40 
 -13   3   1    0.72    0.52 
  13  -3   1    1.49    0.63 
  13  -3   1    1.39    0.53 
  13  -3   1    0.87    0.39 
  13   3  -1    0.29    0.36 
 -13   3   1    0.94    0.50 
  13  -3   1    0.77    0.45 
 -13  -3  -1    1.13    0.45 
 -13  -3  -1   -0.09    0.44 
  13   3  -1    0.93    0.56 
 -13   3   1   -0.11    0.36 
  13   3  -1    0.86    0.44 
 -13  -3  -1    0.82    0.44 
 -13   3  -1    1.21    0.53 
 -13  -3   1    0.85    0.52 
 -13   3  -1    1.02    0.54 
 -13   3  -1    0.88    0.52 
 -13  -3   1    1.27    0.59 
  13  -3  -1    0.15    0.34 
  13  -3  -1    1.04    0.48 
 -13  -3   1    1.33    0.58 
  13  -3  -1    0.96    0.36 
  13   3   1    0.97    0.49 
  13   3   1    1.61    0.59 
 -13   3  -1    0.39    0.41 
  13  -3  -1    1.44    0.72 
  13   3   1    1.28    0.67 
  13   3   1    1.03    0.49 
 -13  -3   1    0.98    0.52 
  13  -3  -1    0.71    0.43 
 -14  -3  -1    9.16    1.24 
  14   3  -1    7.58    1.23 
 -14   3   1   10.93    1.49 
 -14   3   1    8.42    1.33 
 -14   3   1    9.97    1.27 
 -14  -3  -1    9.72    1.33 
  14  -3   1    9.35    1.09 
  14  -3   1    8.65    1.04 
  14   3  -1    9.59    1.18 
  14   3  -1   10.65    1.40 
 -14   3   1    8.71    1.30 
  14  -3   1    9.03    1.38 
  14  -3   1   10.48    1.28 
  14   3  -1    9.23    1.14 
 -14  -3  -1   10.90    1.45 
  14  -3   1    8.04    1.19 
 -14  -3  -1   10.81    1.44 
  14  -3  -1    9.49    1.42 
  14  -3  -1    9.68    1.04 
  14  -3  -1    9.20    1.06 
 -14   3  -1   13.61    1.47 
 -14  -3   1   11.54    1.51 
 -14  -3   1    9.59    1.28 
  14  -3  -1   11.48    1.32 
  14  -3  -1    9.95    1.39 
 -14  -3   1   11.52    1.41 
  14   3   1   10.56    1.24 
 -14   3  -1    9.01    1.31 
  14   3   1   13.41    1.56 
 -14   3  -1   10.38    1.38 
  14   3   1    8.52    1.12 
  14   3   1    9.07    1.37 
 -14   3  -1   10.53    1.43 
 -14  -3   1    9.93    1.35 
   0   4   1    1.63    0.28 
   0  -4  -1    1.71    0.24 
   0  -4   1    1.82    0.25 
   0  -4  -1    1.87    0.25 
   0  -4   1    1.67    0.22 
   0   4  -1    1.67    0.23 
   0  -4  -1    1.61    0.26 
   0  -4  -1    1.35    0.22 
   0  -4   1    1.58    0.25 
   0   4   1    1.67    0.15 
   0   4  -1    1.32    0.21 
   0  -4   1    1.39    0.21 
   0   4   1    1.24    0.20 
   0   4  -1    1.40    0.27 
   0  -4  -1    1.65    0.25 
   0  -4   1    1.73    0.28 
   0   4   1    1.30    0.13 
   0  -4   1    1.44    0.24 
   0   4  -1    1.53    0.25 
   0   4  -1    1.46    0.14 
   0   4   1    1.65    0.29 
   0   4  -1    1.72    0.22 
   0  -4  -1    1.94    0.23 
   0   4   1    1.76    0.25 
   0  -4  -1    1.82    0.23 
   0   4   1    1.68    0.22 
   0  -4  -1    1.79    0.26 
   0   4  -1    1.97    0.30 
   0  -4   1    1.43    0.22 
   1  -4   1   27.33    1.03 
  -1  -4  -1   25.50    0.98 
   1  -4   1   25.90    0.78 
  -1  -4  -1   25.73    0.96 
   1   4  -1   26.21    0.89 
  -1   4   1   25.97    0.90 
  -1   4   1   25.44    0.93 
   1   4  -1   26.34    0.98 
   1   4  -1   27.83    1.00 
  -1  -4  -1   25.60    0.96 
  -1   4   1   25.95    0.88 
   1   4  -1   24.34    1.02 
   1  -4   1   26.01    0.93 
   1   4  -1   26.69    0.97 
  -1  -4  -1   24.67    1.00 
   1  -4   1   25.39    0.95 
   1  -4   1   26.74    1.05 
   1  -4   1   25.98    0.95 
  -1  -4  -1   25.11    0.96 
   1   4  -1   25.23    0.99 
   1  -4   1   26.35    0.88 
  -1   4   1   25.28    1.02 
  -1  -4  -1   25.10    0.96 
  -1  -4  -1   25.86    0.99 
   1   4  -1   26.00    0.90 
  -1   4   1   24.26    1.00 
   1  -4   1   25.85    0.97 
  -1   4  -1   26.44    0.92 
   1   4   1   25.52    1.03 
   1  -4  -1   26.79    1.05 
  -1  -4   1   26.01    0.99 
   1  -4  -1   26.29    0.93 
   1  -4  -1   25.82    0.98 
   1  -4  -1   26.08    0.94 
   1   4   1   24.71    0.90 
  -1   4  -1   26.48    1.00 
   1  -4  -1   24.86    0.99 
   1   4   1   26.27    0.97 
  -1   4  -1   25.23    0.97 
  -1  -4   1   27.24    0.98 
  -1  -4   1   27.54    0.94 
  -1   4  -1   25.27    0.95 
  -1  -4   1   26.17    1.01 
   1  -4  -1   26.01    0.91 
  -1  -4   1   25.04    0.94 
   1  -4  -1   25.33    0.89 
   1   4   1   26.03    0.96 
  -1   4  -1   26.70    1.04 
   1  -4  -1   27.19    0.92 
  -1  -4   1   26.14    0.97 
  -1  -4   1   25.34    1.00 
   1   4   1   25.97    0.97 
  -1   4  -1   27.11    0.97 
   1   4   1   25.18    1.00 
   1   4   1   26.74    0.82 
   2  -4   1   30.17    1.17 
  -2  -4  -1   31.99    1.21 
   2  -4   1   31.07    0.98 
  -2  -4  -1   29.34    1.21 
  -2  -4  -1   31.98    1.19 
   2   4  -1   30.66    1.16 
  -2  -4  -1   29.59    1.17 
  -2   4   1   31.66    1.14 
   2  -4   1   32.33    1.14 
   2  -4   1   31.00    1.16 
   2   4  -1   30.89    1.17 
  -2   4   1   31.20    1.08 
   2  -4   1   29.06    1.22 
   2  -4   1   31.24    1.01 
   2  -4   1   27.67    1.22 
   2  -4   1   31.18    1.09 
   2   4  -1   29.75    1.18 
  -2   4   1   30.29    1.18 
  -2  -4  -1   30.68    1.15 
  -2  -4  -1   31.57    1.17 
  -2   4   1   30.23    1.07 
   2   4  -1   29.67    1.14 
   2  -4   1   31.44    1.17 
   2   4  -1   29.90    1.08 
   2  -4   1   29.37    1.13 
  -2   4   1   29.73    1.18 
   2   4  -1   29.04    1.19 
  -2  -4  -1   32.50    1.12 
  -2   4  -1   32.62    1.17 
  -2   4  -1   32.82    1.21 
  -2  -4   1   32.82    1.18 
   2  -4  -1   32.34    1.11 
  -2  -4   1   33.56    1.08 
   2  -4  -1   33.42    1.25 
   2  -4  -1   35.50    1.12 
  -2   4  -1   30.55    1.13 
  -2  -4   1   32.46    1.24 
   2  -4  -1   33.51    1.09 
   2   4   1   32.26    1.21 
  -2  -4   1   33.66    1.13 
  -2  -4   1   30.64    1.20 
  -2   4  -1   32.27    1.19 
   2   4   1   32.69    1.20 
  -2   4  -1   32.32    1.16 
   2  -4  -1   33.86    0.99 
   2  -4  -1   34.35    1.03 
   2   4   1   33.67    1.18 
   2  -4  -1   33.38    1.21 
   2  -4  -1   34.91    1.21 
   2   4   1   34.57    1.07 
  -2  -4   1   32.28    1.18 
  -2   4  -1   32.95    1.24 
  -2  -4   1   32.80    1.21 
   2  -4  -1   32.41    1.09 
   2  -4  -1   33.28    1.26 
   2   4   1   32.83    1.21 
  -2   4  -1   32.98    1.15 
   2   4   1   35.21    1.21 
  -3  -4  -1   25.72    0.94 
   3  -4   1   27.09    1.02 
   3   4  -1   25.28    1.07 
  -3  -4  -1   25.03    1.12 
  -3  -4  -1   26.16    1.10 
  -3  -4  -1   26.04    1.03 
   3   4  -1   25.83    1.04 
   3  -4   1   25.49    1.01 
   3   4  -1   25.71    1.07 
   3  -4   1   26.00    1.06 
  -3   4   1   27.25    1.07 
  -3  -4  -1   26.68    1.07 
   3   4  -1   26.26    1.01 
   3   4  -1   27.57    1.09 
  -3  -4  -1   26.33    1.08 
  -3   4   1   25.81    0.95 
   3  -4   1   25.22    1.07 
   3  -4   1   26.90    1.03 
   3   4  -1   23.03    1.01 
   3  -4   1   25.36    1.12 
  -3   4   1   25.72    0.95 
  -3  -4  -1   25.02    0.97 
   3   4  -1   25.85    1.06 
  -3   4   1   26.69    1.13 
   3  -4   1   27.38    0.95 
  -3  -4  -1   26.13    1.08 
   3  -4   1   26.23    1.04 
   3  -4   1   25.13    1.13 
  -3   4   1   25.06    1.01 
   3  -4  -1   27.11    0.96 
  -3  -4   1   26.26    1.10 
  -3   4  -1   27.17    1.06 
   3   4   1   27.50    1.10 
   3   4   1   26.90    1.10 
   3  -4  -1   26.89    0.97 
  -3   4  -1   23.87    1.01 
   3  -4  -1   27.16    1.08 
   3   4   1   26.29    1.08 
   3  -4  -1   25.75    1.13 
  -3  -4   1   26.04    0.88 
  -3  -4   1   26.61    1.08 
  -3   4  -1   26.33    1.14 
  -3   4  -1   25.78    1.06 
  -3   4  -1   27.34    1.01 
   3  -4  -1   28.00    0.99 
  -3   4  -1   27.16    1.10 
   3   4   1   25.53    0.97 
   3  -4  -1   27.86    1.14 
   3  -4  -1   27.02    1.08 
   3  -4  -1   27.10    0.93 
   3   4   1   25.39    1.06 
   3  -4  -1   27.44    0.97 
   3   4   1   25.13    1.07 
   3   4   1   25.60    0.95 
  -3  -4   1   26.81    1.08 
  -3  -4   1   26.52    1.12 
   3  -4  -1   26.52    0.85 
  -3   4  -1   27.23    1.04 
  -3  -4   1   26.83    1.02 
  -3  -4   1   27.60    1.08 
   4   4  -1   36.36    1.39 
  -4   4   1   34.01    1.45 
   4  -4   1   37.85    1.36 
  -4  -4  -1   35.03    1.40 
   4   4  -1   36.01    1.31 
   4  -4   1   36.97    1.39 
  -4  -4  -1   35.33    1.38 
   4  -4   1   36.61    1.32 
  -4  -4  -1   35.08    1.31 
   4   4  -1   34.28    1.39 
  -4   4   1   36.50    1.28 
  -4  -4  -1   35.71    1.45 
  -4   4   1   36.43    1.40 
  -4   4   1   36.24    1.26 
   4  -4   1   37.66    1.47 
  -4  -4  -1   36.30    1.40 
  -4  -4  -1   35.35    1.33 
   4  -4   1   38.96    1.33 
   4  -4   1   38.29    1.29 
   4   4  -1   36.84    1.34 
  -4   4   1   35.02    1.25 
   4   4  -1   36.36    1.12 
  -4   4   1   36.76    1.06 
   4   4  -1   34.06    1.40 
  -4  -4  -1   37.69    1.42 
   4   4  -1   35.20    1.35 
   4  -4   1   36.59    1.32 
   4  -4   1   35.80    1.47 
   4   4   1   32.17    1.20 
  -4  -4   1   32.41    1.37 
   4   4   1   31.67    1.38 
   4   4   1   33.77    1.29 
   4   4   1   32.13    1.35 
   4   4   1   34.14    1.37 
   4  -4  -1   31.82    1.35 
   4  -4  -1   33.00    1.37 
  -4   4  -1   31.86    1.29 
  -4  -4   1   31.34    1.33 
   4  -4  -1   35.61    1.25 
   4  -4  -1   32.47    1.39 
  -4   4  -1   33.95    1.39 
   4  -4  -1   34.44    1.46 
   4   4   1   32.40    1.37 
   4  -4  -1   32.66    1.23 
   4  -4  -1   33.92    1.24 
  -4   4  -1   32.98    1.32 
  -4  -4   1   31.54    1.34 
   4  -4  -1   32.59    1.23 
   4  -4  -1   34.74    1.27 
  -4   4  -1   32.16    1.27 
  -4  -4   1   32.54    1.34 
   4   4   1   33.70    1.39 
   4   4   1   32.08    1.27 
  -4   4  -1   34.08    1.45 
  -4  -4   1   32.18    1.30 
  -4   4  -1   34.42    1.26 
  -4  -4   1   33.94    1.42 
   5   4  -1   62.91    2.35 
  -5  -4  -1   68.38    2.44 
  -5   4   1   65.67    1.93 
   5   4  -1   66.75    2.18 
   5  -4   1   65.26    2.24 
  -5  -4  -1   67.18    2.29 
  -5   4   1   64.54    2.20 
  -5   4   1   64.41    2.36 
  -5  -4  -1   65.08    2.33 
   5  -4   1   64.69    2.43 
   5  -4   1   67.34    2.25 
  -5  -4  -1   63.36    2.26 
  -5   4   1   67.55    2.13 
   5   4  -1   62.33    2.28 
  -5   4   1   65.14    2.17 
   5  -4   1   63.61    2.37 
  -5   4   1   63.75    2.42 
   5   4  -1   67.78    2.34 
  -5  -4  -1   63.56    2.34 
   5  -4   1   64.32    2.24 
   5  -4   1   67.16    2.29 
   5   4  -1   65.39    2.28 
   5   4  -1   63.51    2.28 
   5   4  -1   64.05    2.37 
  -5  -4  -1   64.98    2.34 
   5   4  -1   66.40    1.97 
  -5  -4  -1   67.85    2.36 
   5   4   1   67.87    2.35 
  -5  -4   1   66.53    2.32 
   5  -4  -1   66.77    2.18 
  -5   4  -1   59.96    2.40 
   5  -4  -1   66.28    2.46 
   5   4   1   66.98    2.37 
   5  -4  -1   62.21    2.19 
  -5   4  -1   66.81    2.24 
  -5  -4   1   67.87    2.41 
  -5   4  -1   62.68    2.35 
   5   4   1   66.76    2.40 
   5   4   1   67.56    2.18 
   5   4   1   66.74    2.33 
   5  -4  -1   66.32    2.18 
  -5  -4   1   61.93    2.29 
  -5  -4   1   67.11    2.35 
   5   4   1   65.09    2.25 
  -5  -4   1   65.14    2.32 
  -5  -4   1   67.57    2.30 
   5  -4  -1   68.21    2.18 
   5  -4  -1   68.12    2.21 
   5   4   1   66.55    2.10 
  -5   4  -1   58.29    2.33 
  -5   4  -1   66.31    2.13 
   5   4   1   66.38    2.38 
  -5  -4   1   63.84    2.29 
   5  -4  -1   66.32    2.37 
  -6  -4  -1   47.66    1.81 
  -6   4   1   48.64    1.76 
   6   4  -1   43.95    1.80 
  -6  -4  -1   46.25    1.85 
   6  -4   1   47.35    1.98 
  -6   4   1   46.78    1.72 
  -6  -4  -1   48.69    1.97 
   6   4  -1   45.17    1.90 
   6   4  -1   48.63    1.99 
  -6  -4  -1   49.67    1.90 
   6  -4   1   46.32    1.85 
   6  -4   1   46.95    1.77 
   6   4  -1   46.41    1.81 
   6   4  -1   46.68    1.62 
   6   4  -1   46.28    1.91 
  -6  -4  -1   45.99    1.87 
   6  -4   1   47.89    1.81 
  -6   4   1   46.39    1.90 
  -6   4   1   46.17    1.56 
  -6   4   1   50.11    2.01 
   6  -4   1   45.86    1.75 
   6  -4   1   50.49    1.94 
  -6  -4  -1   48.08    1.84 
   6   4  -1   48.58    1.84 
  -6  -4  -1   47.61    1.88 
  -6   4   1   48.69    1.44 
   6   4  -1   46.48    1.45 
   6  -4   1   46.02    1.74 
   6  -4   1   47.54    1.78 
  -6  -4   1   43.77    1.82 
   6  -4  -1   47.08    1.69 
   6   4   1   48.45    1.63 
   6  -4  -1   44.44    1.69 
   6   4   1   44.71    1.58 
   6  -4  -1   49.57    1.72 
   6  -4  -1   46.55    1.86 
  -6   4  -1   44.41    1.75 
   6   4   1   44.48    1.83 
  -6   4  -1   47.14    2.00 
   6   4   1   45.55    1.91 
   6  -4  -1   46.14    1.98 
  -6  -4   1   43.33    1.81 
  -6  -4   1   46.96    1.92 
  -6  -4   1   45.15    1.84 
  -6  -4   1   45.16    1.84 
  -6   4  -1   44.58    1.56 
   6  -4  -1   45.32    1.85 
   6  -4  -1   45.49    1.72 
  -6   4  -1   45.40    1.89 
   6   4   1   47.13    1.88 
   6   4   1   42.92    1.87 
   6   4   1   44.93    1.83 
  -6  -4   1   44.14    1.83 
  -6  -4   1   45.27    1.81 
   7  -4   1   22.53    1.22 
   7   4  -1   25.38    1.22 
   7  -4   1   23.32    1.33 
   7  -4   1   24.17    1.17 
  -7   4   1   22.46    1.31 
   7  -4   1   25.50    1.16 
   7   4  -1   25.24    1.23 
   7  -4   1   24.54    1.17 
  -7  -4  -1   24.53    1.23 
   7   4  -1   23.99    1.22 
  -7  -4  -1   25.30    1.24 
  -7   4   1   23.81    1.13 
  -7   4   1   22.78    1.27 
   7  -4   1   23.88    1.25 
   7   4  -1   23.45    0.97 
  -7  -4  -1   25.29    1.28 
  -7  -4  -1   23.94    1.19 
  -7  -4  -1   25.77    1.29 
   7   4  -1   23.02    1.27 
   7   4  -1   21.98    1.26 
  -7  -4  -1   23.67    1.32 
  -7   4  -1   24.49    1.36 
   7   4   1   23.65    1.30 
   7   4   1   25.59    1.26 
   7  -4  -1   24.82    1.38 
   7   4   1   24.48    1.03 
  -7  -4   1   24.46    1.23 
   7  -4  -1   23.36    1.11 
  -7   4  -1   23.26    1.28 
   7   4   1   23.32    1.23 
  -7  -4   1   22.83    1.21 
   7   4   1   24.12    0.98 
   7  -4  -1   23.45    1.08 
  -7  -4   1   24.57    1.26 
   7  -4  -1   24.35    1.26 
   7   4   1   23.03    1.27 
  -7  -4   1   24.44    1.25 
   7  -4  -1   25.40    1.18 
   7  -4  -1   22.76    1.20 
  -7  -4   1   24.80    1.24 
  -7   4  -1   22.69    1.14 
   8  -4   1   39.06    1.91 
   8   4  -1   39.27    1.84 
   8  -4   1   36.61    1.74 
   8   4  -1   36.42    1.70 
   8   4  -1   37.83    1.69 
   8  -4   1   40.63    1.78 
  -8  -4  -1   34.95    1.73 
  -8  -4  -1   39.15    1.74 
   8  -4   1   36.83    1.62 
   8  -4   1   35.90    1.62 
  -8  -4  -1   37.91    1.71 
  -8  -4  -1   36.61    1.74 
  -8   4   1   38.58    1.89 
   8   4  -1   38.90    1.84 
  -8   4   1   34.98    1.78 
  -8   4   1   35.96    1.60 
  -8  -4  -1   38.59    1.79 
   8  -4   1   37.44    1.68 
  -8   4  -1   39.11    1.67 
  -8  -4   1   41.59    1.79 
  -8  -4   1   38.52    1.78 
   8  -4  -1   37.94    1.59 
   8  -4  -1   39.63    1.73 
   8   4   1   38.56    1.74 
   8  -4  -1   37.93    1.78 
  -8  -4   1   38.70    1.74 
   8  -4  -1   39.51    1.57 
  -8  -4   1   40.45    1.78 
   8   4   1   38.29    1.84 
  -8  -4   1   40.79    1.78 
   8  -4  -1   40.40    1.94 
   8   4   1   39.12    1.83 
   8   4   1   37.62    1.72 
   8  -4  -1   37.26    1.66 
  -8   4  -1   37.98    1.83 
  -8   4  -1   38.90    1.91 
   9  -4   1   20.74    1.39 
  -9  -4  -1   22.53    1.27 
  -9   4   1   21.19    1.40 
   9  -4   1   22.51    1.23 
  -9  -4  -1   22.95    1.30 
   9   4  -1   22.97    1.28 
   9   4  -1   24.04    1.29 
   9  -4   1   24.40    1.33 
   9   4  -1   20.93    1.35 
  -9  -4  -1   22.58    1.35 
   9   4  -1   23.00    1.40 
  -9  -4  -1   22.92    1.35 
  -9   4   1   22.81    1.23 
   9  -4   1   21.57    1.19 
  -9  -4  -1   22.49    1.34 
  -9   4   1   22.86    1.41 
   9  -4   1   22.53    1.34 
   9  -4   1   21.87    1.24 
   9   4   1   20.43    1.26 
  -9   4  -1   23.63    1.42 
   9  -4  -1   23.35    1.16 
   9  -4  -1   22.59    1.45 
   9   4   1   21.79    1.38 
   9   4   1   22.34    1.31 
   9   4   1   24.78    1.44 
  -9  -4   1   22.62    1.29 
  -9  -4   1   23.59    1.36 
  -9   4  -1   23.43    1.27 
   9  -4  -1   22.53    1.36 
  -9  -4   1   22.95    1.33 
   9  -4  -1   23.57    1.21 
   9  -4  -1   23.68    1.29 
   9  -4  -1   23.76    1.28 
  -9   4  -1   25.47    1.52 
  -9  -4   1   23.44    1.37 
  -9  -4   1   24.48    1.36 
  10   4  -1   14.43    1.14 
 -10  -4  -1   15.27    1.05 
  10  -4   1   15.43    1.15 
  10  -4   1   15.10    1.05 
  10   4  -1   14.15    1.02 
 -10  -4  -1   14.92    1.12 
  10   4  -1   15.02    1.18 
 -10   4   1   14.21    1.42 
  10   4  -1   15.30    1.09 
 -10   4   1   15.71    1.22 
 -10  -4  -1   15.57    1.16 
 -10  -4  -1   15.07    1.12 
  10  -4   1   15.37    1.03 
  10  -4   1   14.04    1.02 
  10  -4   1   16.11    1.55 
 -10  -4  -1   16.26    1.10 
 -10   4   1   13.28    0.98 
  10  -4   1   16.08    1.01 
 -10  -4   1   13.93    1.07 
 -10  -4   1   14.90    1.10 
  10  -4  -1   13.77    1.08 
 -10  -4   1   13.36    1.33 
  10  -4  -1   13.10    0.93 
 -10   4  -1   13.64    1.02 
  10   4   1   13.30    1.03 
  10  -4  -1   14.95    1.22 
 -10   4  -1   12.94    1.38 
 -10  -4   1   14.51    1.04 
  10   4   1   13.29    1.34 
 -10   4  -1   12.55    1.28 
  10  -4  -1   13.00    0.89 
  10  -4  -1   14.19    1.02 
  10   4   1   14.19    1.07 
 -10  -4   1   13.58    1.08 
  10   4   1   14.66    1.39 
  11  -4   1    0.84    0.40 
 -11   4   1    0.52    0.45 
  11   4  -1    0.92    0.47 
 -11  -4  -1    0.56    0.41 
  11  -4   1    0.89    0.40 
 -11  -4  -1    0.95    0.48 
 -11  -4  -1    1.09    0.46 
 -11   4   1    0.57    0.42 
 -11  -4  -1    0.74    0.47 
  11  -4   1    1.14    0.42 
  11  -4   1    0.62    0.46 
 -11  -4  -1    0.69    0.36 
 -11   4   1    0.89    0.40 
  11   4  -1    0.80    0.44 
  11   4  -1    1.05    0.40 
  11   4  -1    0.50    0.35 
  11  -4   1    0.70    0.33 
  11   4   1    0.48    0.39 
 -11   4  -1    1.09    0.44 
  11   4   1    1.13    0.50 
  11  -4  -1    0.87    0.36 
  11   4   1    0.79    0.43 
 -11   4  -1    0.70    0.49 
 -11  -4   1    1.49    0.48 
  11  -4  -1    0.53    0.42 
 -11  -4   1    1.22    0.51 
  11  -4  -1    1.14    0.48 
 -11   4  -1    0.84    0.45 
  11  -4  -1    0.95    0.34 
 -11  -4   1    1.15    0.41 
 -11  -4   1    1.23    0.51 
  11   4   1    1.12    0.49 
  11  -4  -1    1.30    0.41 
 -11  -4   1    1.16    0.47 
 -12  -4  -1   17.43    1.28 
  12  -4   1   13.50    1.05 
  12  -4   1   15.85    1.26 
 -12  -4  -1   15.63    1.54 
  12  -4   1   16.46    1.76 
 -12   4   1   16.02    1.67 
  12   4  -1   15.11    1.18 
 -12  -4  -1   17.30    1.38 
  12   4  -1   17.06    1.68 
  12  -4   1   15.94    1.22 
  12   4  -1   16.51    1.22 
 -12   4   1   14.71    1.61 
  12  -4   1   15.93    1.17 
 -12  -4  -1   15.36    1.55 
  12   4  -1   14.21    1.53 
 -12   4   1   14.95    1.19 
 -12   4  -1   16.07    1.24 
  12  -4  -1   17.50    1.25 
 -12  -4   1   17.32    1.65 
  12   4   1   15.24    1.22 
  12  -4  -1   16.29    1.14 
  12   4   1   18.28    1.73 
  12   4   1   17.81    1.29 
 -12   4  -1   14.94    1.60 
  12  -4  -1   15.66    1.04 
  12  -4  -1   17.14    1.74 
 -12  -4   1   16.95    1.60 
 -12  -4   1   13.69    1.40 
 -12   4  -1   18.41    1.79 
  12   4   1   17.44    1.73 
  12  -4  -1   16.15    1.58 
 -12  -4   1   15.62    1.51 
 -13  -4  -1   -0.28    0.40 
  13  -4   1    0.13    0.34 
 -13  -4  -1    0.30    0.43 
  13  -4   1    0.56    0.49 
  13   4  -1    0.38    0.40 
  13   4  -1   -0.12    0.32 
  13   4  -1    0.12    0.35 
 -13  -4  -1    0.40    0.52 
 -13   4   1   -0.24    0.34 
 -13   4   1    0.54    0.46 
  13   4  -1    0.16    0.41 
 -13  -4  -1    0.02    0.32 
  13  -4   1   -0.39    0.23 
  13  -4   1    0.00    0.32 
  13  -4   1    0.40    0.41 
 -13   4   1    0.01    0.34 
  13  -4  -1    0.41    0.32 
 -13  -4   1    0.36    0.40 
 -13  -4   1    0.57    0.53 
  13  -4  -1    0.20    0.35 
 -13  -4   1    0.06    0.34 
  13   4   1    0.20    0.38 
  13  -4  -1    0.16    0.34 
  13  -4  -1    0.38    0.56 
 -13   4  -1    0.09    0.40 
  13  -4  -1    0.69    0.40 
 -13   4  -1   -0.23    0.37 
 -13   4  -1   -0.46    0.37 
 -13  -4   1    0.51    0.50 
  13   4   1    0.85    0.51 
  13   4   1    0.39    0.36 
  13   4   1    0.43    0.42 
  14   4  -1    3.75    0.98 
  14  -4   1    1.97    0.66 
  14  -4   1    3.83    0.71 
 -14   4   1    4.60    0.96 
  14   4  -1    4.26    0.84 
 -14   4   1    4.96    0.93 
 -14   4   1    3.45    1.00 
 -14   4   1    5.19    0.90 
  14   4  -1    5.50    0.85 
 -14  -4  -1    4.37    0.96 
  14  -4   1    3.97    0.87 
  14   4  -1    3.50    0.75 
 -14  -4  -1    5.40    0.97 
 -14  -4  -1    3.84    0.83 
  14   4   1    3.54    0.76 
  14  -4  -1    2.86    0.76 
 -14  -4   1    3.21    0.82 
  14   4   1    3.32    0.85 
 -14   4  -1    3.67    0.84 
  14  -4  -1    4.50    0.75 
 -14   4  -1    3.85    0.84 
  14  -4  -1    3.96    0.89 
  14   4   1    4.63    0.85 
  14   4   1    3.75    0.80 
 -14  -4   1    3.37    0.79 
 -14  -4   1    6.94    1.14 
 -14   4  -1    3.81    0.81 
 -14   4  -1    2.44    0.82 
   0  -5   1   23.02    0.91 
   0   5  -1   22.38    0.75 
   0  -5   1   21.60    0.94 
   0  -5  -1   22.98    0.88 
   0   5   1   22.52    0.88 
   0   5  -1   21.46    0.99 
   0   5   1   24.46    0.79 
   0  -5   1   24.08    0.90 
   0   5   1   22.59    0.91 
   0  -5  -1   23.69    0.94 
   0   5   1   23.30    0.90 
   0  -5   1   22.83    0.96 
   0   5  -1   20.89    0.89 
   0   5  -1   23.94    0.95 
   0   5   1   22.53    0.74 
   0  -5  -1   21.87    0.95 
   0   5   1   22.01    0.98 
   0   5  -1   24.22    0.87 
   0  -5  -1   23.38    0.89 
   0  -5  -1   22.72    0.90 
   0  -5   1   22.54    0.94 
   0  -5   1   21.91    0.88 
   0  -5  -1   22.07    0.92 
   0  -5  -1   22.93    0.93 
   0   5   1   21.53    0.99 
   0   5  -1   23.59    0.93 
   0  -5   1   22.92    0.90 
   1  -5   1  183.52    5.56 
  -1  -5  -1  193.67    5.56 
   1  -5   1  191.78    5.63 
  -1  -5  -1  185.95    5.61 
   1  -5   1  183.24    5.66 
   1   5  -1  189.23    5.58 
   1   5  -1  189.49    5.61 
   1   5  -1  191.73    5.44 
   1  -5   1  185.94    5.52 
   1  -5   1  198.44    5.51 
  -1  -5  -1  191.24    5.58 
   1   5  -1  185.82    5.54 
  -1  -5  -1  184.46    5.54 
   1   5  -1  192.42    5.59 
  -1   5   1  188.06    5.42 
  -1   5   1  179.60    5.52 
   1  -5   1  181.06    5.44 
  -1   5   1  185.23    5.51 
  -1   5   1  183.49    5.63 
   1   5  -1  181.46    5.66 
   1   5  -1  186.00    5.44 
  -1  -5  -1  189.20    5.57 
   1  -5   1  194.79    5.55 
  -1   5   1  194.49    5.67 
  -1  -5  -1  187.62    5.57 
  -1  -5  -1  178.87    5.57 
  -1   5   1  189.12    5.48 
   1   5   1  194.01    5.35 
   1  -5  -1  189.70    5.53 
  -1  -5   1  188.78    5.55 
  -1   5  -1  194.68    5.57 
   1  -5  -1  190.41    5.47 
  -1  -5   1  185.23    5.62 
   1   5   1  182.86    5.66 
   1  -5  -1  187.02    5.49 
  -1   5  -1  191.62    5.48 
  -1  -5   1  189.58    5.59 
   1   5   1  185.63    5.45 
   1   5   1  191.26    5.64 
  -1  -5   1  189.45    5.56 
   1   5   1  186.49    5.56 
   1   5   1  188.87    5.54 
  -1   5  -1  181.15    5.52 
   1   5   1  197.89    5.58 
  -1  -5   1  190.23    5.62 
  -1   5  -1  189.11    5.58 
  -1   5  -1  188.43    5.62 
  -1  -5   1  191.85    5.56 
   1  -5  -1  187.89    5.66 
   1  -5  -1  197.66    5.53 
   1  -5  -1  182.24    5.57 
  -1  -5   1  194.48    5.53 
   1  -5  -1  186.08    5.59 
  -1   5  -1  185.51    5.66 
   1  -5  -1  192.53    5.49 
   2  -5   1    9.78    0.57 
  -2   5   1    8.41    0.56 
   2   5  -1    8.80    0.57 
   2  -5   1   10.00    0.63 
   2  -5   1    9.73    0.37 
  -2  -5  -1    8.94    0.49 
   2   5  -1    8.63    0.52 
   2  -5   1    9.71    0.54 
   2   5  -1    9.66    0.57 
  -2  -5  -1    9.18    0.55 
  -2  -5  -1    8.77    0.57 
   2  -5   1    9.57    0.51 
  -2  -5  -1    8.47    0.53 
  -2  -5  -1    8.92    0.53 
   2   5  -1    8.62    0.53 
   2  -5   1    8.41    0.51 
   2  -5   1    9.67    0.48 
   2  -5   1    9.47    0.59 
  -2   5   1    9.21    0.46 
   2  -5   1    9.25    0.40 
  -2   5   1    9.33    0.57 
  -2  -5  -1    9.05    0.54 
  -2  -5  -1    8.79    0.56 
   2   5  -1    9.39    0.46 
   2  -5   1    9.45    0.54 
  -2   5   1    9.40    0.49 
   2   5  -1    9.47    0.51 
  -2   5   1    9.09    0.49 
  -2   5   1    9.01    0.49 
   2  -5  -1    9.30    0.55 
  -2  -5   1    9.45    0.54 
  -2   5  -1    9.89    0.58 
   2   5   1    9.57    0.55 
  -2   5  -1    9.80    0.54 
  -2   5  -1    9.21    0.57 
   2  -5  -1    9.88    0.34 
   2   5   1   10.39    0.58 
  -2  -5   1   10.06    0.61 
  -2  -5   1   10.24    0.49 
   2  -5  -1    9.38    0.49 
   2  -5  -1   10.08    0.62 
  -2  -5   1    8.81    0.53 
  -2  -5   1   10.10    0.51 
   2  -5  -1    9.14    0.56 
   2  -5  -1    9.35    0.43 
   2   5   1   10.90    0.57 
   2   5   1    9.66    0.59 
  -2   5  -1    9.77    0.51 
   2  -5  -1   10.30    0.49 
   2   5   1   10.64    0.59 
   2  -5  -1   11.36    0.53 
   2  -5  -1    9.83    0.49 
   2   5   1   10.27    0.53 
  -2   5  -1   10.86    0.56 
  -2   5  -1   10.30    0.55 
  -2   5  -1   10.09    0.53 
  -2  -5   1   10.68    0.60 
   2  -5  -1    8.78    0.57 
   2   5   1    9.54    0.42 
  -2  -5   1    9.68    0.58 
  -2   5  -1    9.84    0.58 
   3   5  -1  118.27    3.88 
   3  -5   1  124.85    3.80 
   3  -5   1  125.73    3.80 
   3  -5   1  123.48    3.97 
  -3  -5  -1  120.00    3.72 
  -3  -5  -1  116.45    3.87 
  -3  -5  -1  124.40    3.73 
   3  -5   1  123.34    3.88 
  -3   5   1  118.71    3.85 
   3  -5   1  130.93    3.86 
  -3   5   1  121.14    3.96 
   3  -5   1  126.43    3.80 
  -3  -5  -1  121.72    3.88 
   3   5  -1  124.56    3.88 
   3   5  -1  124.82    3.76 
   3  -5   1  128.57    3.83 
  -3   5   1  122.65    3.83 
  -3   5   1  120.59    3.89 
   3   5  -1  123.51    3.85 
  -3  -5  -1  122.91    3.92 
  -3  -5  -1  121.04    3.85 
   3  -5   1  127.93    3.52 
  -3   5   1  123.18    3.72 
   3   5  -1  125.41    3.86 
  -3  -5  -1  124.72    3.84 
  -3   5   1  125.77    3.74 
   3   5  -1  124.79    3.89 
   3   5  -1  125.39    3.89 
  -3  -5  -1  129.26    3.98 
   3  -5   1  126.62    3.89 
   3  -5   1  123.81    3.99 
   3  -5   1  127.70    3.65 
   3  -5  -1  128.01    3.74 
   3  -5  -1  118.99    3.73 
   3  -5  -1  128.07    3.75 
  -3   5  -1  125.65    3.89 
  -3  -5   1  119.95    3.92 
  -3   5  -1  126.96    3.85 
   3   5   1  123.84    3.72 
  -3   5  -1  118.17    3.84 
   3  -5  -1  124.20    3.97 
  -3   5  -1  122.81    3.96 
   3  -5  -1  129.21    3.60 
  -3  -5   1  126.49    3.67 
   3   5   1  123.49    3.89 
   3   5   1  127.14    3.92 
   3  -5  -1  122.45    3.97 
  -3  -5   1  126.54    3.89 
   3   5   1  120.67    3.90 
   3   5   1  121.76    3.87 
   3  -5  -1  123.81    3.87 
   3   5   1  125.41    3.75 
  -3  -5   1  128.03    3.97 
   3  -5  -1  128.98    3.63 
   3   5   1  129.09    3.90 
   3  -5  -1  128.97    3.77 
  -3   5  -1  125.84    3.85 
  -3  -5   1  127.81    3.88 
   3   5   1  127.61    3.89 
  -3   5  -1  119.41    3.79 
  -3  -5   1  123.83    3.90 
   3  -5  -1  125.27    3.90 
  -3  -5   1  123.94    3.79 
  -3   5  -1  116.53    3.80 
   3  -5  -1  125.62    3.75 
   4  -5   1   30.89    1.16 
   4  -5   1   30.26    1.17 
   4  -5   1   29.82    1.08 
  -4  -5  -1   27.43    1.17 
  -4   5   1   28.53    1.16 
  -4  -5  -1   27.58    1.12 
   4  -5   1   29.13    1.31 
   4  -5   1   28.22    1.21 
   4   5  -1   27.73    1.24 
  -4  -5  -1   29.99    1.32 
   4   5  -1   29.69    0.99 
   4  -5   1   28.49    1.31 
  -4   5   1   28.05    1.30 
  -4   5   1   28.36    1.10 
  -4  -5  -1   28.13    1.23 
  -4   5   1   27.84    1.09 
   4   5  -1   26.93    1.13 
   4  -5   1   26.81    1.14 
   4   5  -1   28.64    1.23 
  -4   5   1   30.03    1.24 
  -4  -5  -1   31.62    1.24 
   4   5  -1   29.98    1.25 
  -4  -5  -1   28.06    1.23 
  -4   5   1   28.77    0.88 
   4   5  -1   28.68    1.20 
   4  -5   1   32.34    1.22 
  -4  -5  -1   28.20    1.25 
   4   5  -1   30.65    1.24 
   4  -5  -1   28.15    1.22 
  -4  -5   1   29.93    1.18 
   4   5   1   28.70    1.25 
   4   5   1   27.81    1.06 
  -4   5  -1   27.40    1.13 
   4  -5  -1   27.16    1.30 
  -4   5  -1   27.89    1.24 
  -4  -5   1   28.20    0.97 
  -4   5  -1   29.06    1.16 
   4  -5  -1   28.12    1.04 
   4  -5  -1   28.02    1.22 
   4   5   1   27.68    1.21 
  -4   5  -1   29.40    1.24 
   4   5   1   27.87    1.10 
  -4  -5   1   28.65    1.29 
   4  -5  -1   28.23    1.11 
  -4   5  -1   28.21    1.30 
   4  -5  -1   28.81    1.10 
  -4  -5   1   29.11    1.23 
  -4  -5   1   26.45    1.23 
   4   5   1   27.60    1.24 
   4  -5  -1   26.86    1.26 
   4  -5  -1   28.78    0.89 
   4  -5  -1   28.58    1.09 
   4  -5  -1   26.97    1.08 
  -4  -5   1   27.72    1.22 
   4   5   1   27.96    1.24 
  -4   5  -1   27.34    1.18 
  -4  -5   1   29.95    1.24 
  -5  -5  -1   54.96    2.05 
   5   5  -1   58.57    2.14 
   5   5  -1   55.68    2.13 
   5   5  -1   53.39    2.12 
   5  -5   1   53.16    2.16 
   5   5  -1   59.04    2.02 
   5   5  -1   56.64    1.76 
   5   5  -1   57.36    2.08 
  -5  -5  -1   54.35    2.12 
  -5   5   1   53.09    1.95 
  -5  -5  -1   54.26    2.19 
   5   5  -1   61.86    2.14 
   5   5  -1   60.59    2.06 
   5  -5   1   59.80    2.02 
  -5   5   1   55.09    2.11 
   5  -5   1   57.00    2.11 
   5  -5   1   55.68    2.00 
   5  -5   1   61.75    2.08 
  -5  -5  -1   57.24    2.02 
   5  -5   1   55.33    2.22 
  -5   5   1   54.69    2.23 
   5  -5   1   55.83    2.01 
  -5  -5  -1   54.63    2.12 
  -5   5   1   55.40    1.95 
   5  -5   1   56.83    1.95 
  -5  -5  -1   54.69    2.08 
  -5   5   1   52.59    1.93 
  -5  -5  -1   56.09    2.13 
   5  -5  -1   56.64    1.97 
   5   5   1   58.72    2.12 
   5  -5  -1   56.82    1.95 
  -5   5  -1   57.60    2.01 
   5   5   1   60.37    2.15 
  -5  -5   1   57.17    2.15 
  -5  -5   1   58.43    2.06 
   5  -5  -1   62.83    1.97 
   5  -5  -1   55.63    2.23 
   5  -5  -1   56.36    2.12 
  -5  -5   1   56.84    2.10 
  -5  -5   1   60.26    2.23 
  -5  -5   1   58.86    2.08 
   5   5   1   57.99    2.01 
   5   5   1   54.80    2.14 
   5  -5  -1   55.36    1.93 
   5   5   1   55.89    2.15 
  -5  -5   1   57.65    2.12 
   5  -5  -1   59.24    1.95 
  -5   5  -1   56.83    2.13 
  -5   5  -1   55.52    1.96 
  -5   5  -1   56.97    2.23 
  -5  -5   1   54.70    2.09 
   5   5   1   56.86    1.88 
   5   5   1   56.82    2.15 
   5  -5  -1   57.01    2.17 
   5   5   1   55.24    2.00 
  -6  -5  -1    1.07    0.34 
  -6   5   1    1.48    0.39 
  -6  -5  -1    1.18    0.35 
  -6   5   1    1.39    0.32 
  -6  -5  -1    0.59    0.26 
   6  -5   1    0.98    0.34 
   6   5  -1    1.10    0.30 
   6  -5   1    1.40    0.30 
  -6   5   1    1.36    0.25 
   6   5  -1    1.50    0.36 
  -6  -5  -1    1.20    0.32 
   6  -5   1    0.89    0.28 
  -6   5   1    1.05    0.35 
   6  -5   1    1.09    0.35 
  -6  -5  -1    1.53    0.44 
   6   5  -1    1.54    0.28 
   6   5  -1    1.31    0.31 
   6   5  -1    1.14    0.34 
   6  -5   1    1.06    0.30 
  -6  -5  -1    1.01    0.28 
   6  -5   1    1.43    0.29 
  -6   5   1    0.91    0.25 
   6   5  -1    1.22    0.33 
  -6  -5  -1    0.94    0.31 
  -6  -5   1    1.57    0.38 
  -6   5  -1    1.56    0.26 
   6   5   1    1.17    0.35 
  -6  -5   1    1.29    0.32 
  -6  -5   1    0.82    0.29 
   6   5   1    1.01    0.27 
   6   5   1    1.40    0.23 
   6   5   1    0.81    0.29 
  -6   5  -1    1.53    0.38 
  -6   5  -1    0.73    0.25 
   6  -5  -1    1.27    0.35 
   6   5   1    1.25    0.33 
   6  -5  -1    1.27    0.26 
   6  -5  -1    1.47    0.30 
   6   5   1    1.61    0.28 
   6  -5  -1    1.12    0.33 
   6  -5  -1    1.10    0.27 
  -6  -5   1    1.05    0.32 
   6   5   1    1.97    0.44 
   6  -5  -1    1.18    0.27 
  -6  -5   1    1.10    0.31 
  -6  -5   1    1.28    0.30 
   6  -5  -1    1.43    0.39 
   6   5   1    0.99    0.32 
  -6   5  -1    1.18    0.37 
   6  -5  -1    1.02    0.27 
  -6  -5   1    1.99    0.45 
  -7  -5  -1   14.82    0.92 
  -7   5   1   15.16    0.86 
  -7   5   1   16.10    1.08 
  -7  -5  -1   13.98    0.90 
  -7   5   1   13.74    0.97 
   7   5  -1   15.97    0.78 
   7  -5   1   13.70    0.85 
   7   5  -1   14.99    0.93 
   7  -5   1   16.00    0.88 
   7   5  -1   15.33    0.95 
  -7  -5  -1   16.72    1.14 
  -7  -5  -1   15.63    1.00 
  -7  -5  -1   13.97    0.93 
  -7  -5  -1   15.20    0.96 
   7  -5   1   13.66    0.93 
   7  -5   1   14.29    1.03 
   7   5  -1   14.95    0.99 
   7   5  -1   15.05    0.99 
   7  -5   1   15.47    0.99 
   7   5  -1   14.17    0.90 
   7  -5  -1   14.83    0.83 
   7  -5  -1   16.41    1.00 
  -7   5  -1   15.74    1.07 
   7  -5  -1   14.85    0.81 
   7   5   1   15.52    1.02 
   7  -5  -1   16.49    1.09 
  -7  -5   1   14.94    0.98 
   7  -5  -1   14.05    0.94 
  -7  -5   1   14.36    0.91 
  -7   5  -1   15.16    1.01 
   7   5   1   14.91    1.01 
  -7  -5   1   16.15    0.98 
   7   5   1   15.93    0.77 
  -7  -5   1   14.36    0.93 
  -7  -5   1   17.32    1.02 
   7   5   1   16.30    0.98 
  -7   5  -1   14.07    0.86 
   7   5   1   14.77    0.95 
   8   5  -1    2.06    0.48 
  -8  -5  -1    3.37    0.58 
   8  -5   1    4.41    0.57 
   8  -5   1    2.20    0.43 
   8   5  -1    2.83    0.53 
  -8  -5  -1    4.15    0.67 
  -8   5   1    4.03    0.66 
   8   5  -1    2.34    0.45 
   8   5  -1    2.30    0.51 
  -8  -5  -1    3.40    0.55 
  -8  -5  -1    2.92    0.55 
   8  -5   1    3.90    0.54 
   8  -5   1    3.54    0.59 
  -8  -5  -1    4.16    0.64 
  -8   5   1    2.67    0.57 
   8  -5   1    2.80    0.61 
  -8   5   1    3.22    0.49 
   8   5  -1    2.78    0.52 
   8  -5   1    3.56    0.60 
  -8  -5   1    4.02    0.61 
  -8   5  -1    2.28    0.53 
  -8  -5   1    3.64    0.61 
  -8  -5   1    4.41    0.68 
   8  -5  -1    2.59    0.42 
   8   5   1    2.65    0.56 
  -8  -5   1    3.66    0.59 
  -8   5  -1    3.38    0.52 
   8  -5  -1    3.32    0.48 
   8   5   1    3.61    0.63 
   8  -5  -1    3.00    0.63 
   8   5   1    3.32    0.58 
   8  -5  -1    3.60    0.62 
   8   5   1    2.82    0.52 
  -8   5  -1    3.00    0.60 
   8  -5  -1    2.99    0.54 
   8  -5  -1    3.01    0.48 
  -8  -5   1    4.43    0.63 
   9  -5   1    1.02    0.38 
   9  -5   1    0.61    0.39 
   9   5  -1    0.49    0.36 
  -9  -5  -1    0.60    0.35 
  -9  -5  -1    0.68    0.34 
  -9  -5  -1    0.45    0.32 
  -9  -5  -1    0.90    0.39 
   9   5  -1    0.61    0.33 
  -9   5   1    0.89    0.42 
   9  -5   1    0.31    0.30 
  -9   5   1    0.80    0.31 
   9  -5   1    1.15    0.38 
   9   5  -1    0.65    0.34 
  -9   5   1    0.62    0.35 
   9  -5   1    0.49    0.27 
   9   5  -1    0.91    0.38 
  -9  -5  -1    0.11    0.28 
   9  -5   1    0.65    0.31 
  -9  -5   1    0.74    0.40 
  -9   5  -1   -0.05    0.23 
   9  -5  -1    0.67    0.28 
   9  -5  -1    0.62    0.36 
   9   5   1    0.68    0.34 
  -9  -5   1    0.79    0.35 
   9  -5  -1    0.44    0.33 
  -9   5  -1    0.66    0.40 
   9  -5  -1    0.71    0.28 
   9   5   1    0.84    0.39 
   9   5   1    0.12    0.28 
   9   5   1    0.19    0.32 
   9  -5  -1    0.47    0.31 
  -9   5  -1    0.81    0.33 
  -9  -5   1    0.88    0.40 
   9  -5  -1    0.44    0.27 
  -9  -5   1    0.93    0.36 
  -9  -5   1    0.28    0.31 
  10   5  -1    3.28    0.63 
 -10   5   1    2.99    0.66 
  10  -5   1    2.54    0.53 
  10   5  -1    3.02    0.67 
  10  -5   1    3.34    0.75 
 -10   5   1    3.12    0.73 
 -10  -5  -1    2.25    0.54 
  10  -5   1    2.80    0.60 
  10  -5   1    2.93    0.58 
 -10  -5  -1    3.04    0.61 
  10   5  -1    2.88    0.58 
 -10   5   1    2.20    0.49 
  10  -5   1    3.02    0.57 
 -10  -5  -1    2.80    0.64 
  10   5  -1    2.82    0.68 
  10  -5   1    2.95    0.55 
 -10  -5  -1    2.99    0.63 
 -10  -5  -1    3.52    0.66 
  10   5   1    2.95    0.67 
 -10  -5   1    4.23    0.75 
 -10   5  -1    2.66    0.71 
 -10  -5   1    2.80    0.56 
  10   5   1    3.41    0.69 
  10   5   1    3.58    0.70 
 -10  -5   1    3.84    0.68 
  10  -5  -1    2.70    0.59 
  10  -5  -1    3.30    0.58 
 -10   5  -1    2.58    0.55 
  10   5   1    1.95    0.50 
 -10  -5   1    2.62    0.56 
  10  -5  -1    2.77    0.63 
 -10  -5   1    3.39    0.70 
 -10   5  -1    2.47    0.62 
  10  -5  -1    2.46    0.47 
  10  -5  -1    2.87    0.49 
  10  -5  -1    4.41    0.69 
  11   5  -1    3.94    0.82 
  11  -5   1    5.19    0.84 
  11  -5   1    5.56    0.75 
 -11  -5  -1    6.05    0.91 
 -11   5   1    6.03    1.01 
  11   5  -1    4.52    0.86 
 -11   5   1    6.12    1.02 
 -11  -5  -1    6.95    0.97 
 -11  -5  -1    6.26    0.88 
  11   5  -1    4.75    0.75 
 -11  -5  -1    7.49    1.07 
  11  -5   1    5.21    0.96 
 -11   5   1    5.16    0.76 
  11   5  -1    4.48    0.76 
  11  -5   1    4.77    0.76 
 -11  -5  -1    5.61    0.84 
  11  -5   1    6.00    0.81 
 -11   5  -1    5.62    0.99 
  11   5   1    4.24    0.83 
 -11   5  -1    6.41    1.02 
 -11  -5   1    5.33    0.91 
  11  -5  -1    3.87    0.86 
  11  -5  -1    5.47    0.73 
  11  -5  -1    5.58    0.69 
  11   5   1    5.01    0.80 
 -11  -5   1    5.77    0.85 
  11   5   1    5.62    0.84 
 -11  -5   1    5.14    0.84 
 -11  -5   1    5.68    0.87 
  11  -5  -1    5.33    0.87 
  11  -5  -1    6.39    0.85 
 -11   5  -1    3.79    0.68 
  11   5   1    5.26    0.88 
 -11  -5   1    6.29    0.93 
  12  -5   1    0.83    0.37 
  12   5  -1    1.46    0.49 
 -12  -5  -1    1.56    0.56 
  12  -5   1    0.87    0.49 
 -12   5   1    0.62    0.40 
  12   5  -1    1.16    0.47 
  12  -5   1    0.61    0.50 
 -12   5   1    0.81    0.48 
 -12  -5  -1    0.51    0.45 
 -12  -5  -1    0.21    0.31 
 -12  -5  -1    0.77    0.51 
 -12   5   1    1.65    0.63 
  12  -5   1    0.98    0.43 
  12   5  -1    1.39    0.52 
  12   5  -1    1.47    0.65 
  12  -5  -1    0.77    0.34 
 -12   5  -1    0.38    0.41 
  12  -5  -1    0.46    0.38 
  12  -5  -1    0.79    0.40 
 -12  -5   1    1.00    0.52 
 -12  -5   1    1.14    0.58 
 -12   5  -1    1.33    0.53 
 -12  -5   1    0.41    0.44 
  12   5   1    0.78    0.52 
  12   5   1    0.21    0.31 
 -12  -5   1    1.14    0.45 
  12   5   1    0.92    0.45 
  12  -5  -1    1.07    0.55 
 -12  -5   1    0.75    0.39 
  12   5   1    0.80    0.42 
 -12   5  -1    0.04    0.39 
  13  -5   1    9.80    1.06 
 -13  -5  -1   11.39    1.43 
  13   5  -1   10.01    1.15 
 -13   5   1   11.72    1.30 
  13   5  -1    9.87    1.31 
  13  -5   1   13.70    1.66 
  13  -5   1   10.23    1.31 
 -13  -5  -1   11.07    1.32 
  13   5  -1   10.19    1.17 
  13   5  -1   11.50    1.51 
 -13  -5  -1   11.82    1.38 
 -13   5   1   10.67    1.43 
 -13  -5  -1   12.34    1.47 
 -13   5   1   12.30    1.55 
  13  -5   1   10.05    1.14 
  13  -5  -1   11.15    0.88 
 -13  -5   1   13.01    1.48 
 -13   5  -1   10.94    1.39 
  13   5   1    9.36    1.29 
 -13  -5   1   14.69    1.58 
 -13  -5   1   12.37    1.47 
  13  -5  -1    9.13    1.21 
  13   5   1    8.64    1.15 
  13   5   1   11.84    1.30 
  13  -5  -1    9.59    1.48 
 -13   5  -1   13.05    1.64 
  13  -5  -1   12.25    1.19 
 -13   5  -1   12.40    1.33 
  13   5   1   12.93    1.58 
 -13  -5   1   14.24    1.55 
 -14   5   1    0.57    0.41 
 -14  -5  -1    0.48    0.42 
  14   5  -1   -0.14    0.34 
  14  -5   1    0.57    0.38 
 -14  -5  -1   -0.17    0.46 
 -14   5   1    0.10    0.29 
 -14  -5   1   -0.29    0.41 
  14   5   1    0.58    0.46 
  14   5   1   -0.03    0.39 
 -14   5  -1    0.59    0.40 
 -14  -5   1   -0.09    0.41 
  14  -5  -1    0.22    0.28 
 -14   5  -1   -0.11    0.29 
 -14  -5   1   -0.10    0.40 
   0  -6  -1   20.69    0.84 
   0   6   1   18.55    0.95 
   0  -6  -1   19.51    0.89 
   0  -6  -1   19.65    0.88 
   0  -6  -1   18.41    0.89 
   0  -6   1   19.13    0.83 
   0  -6  -1   19.36    0.84 
   0   6   1   18.89    0.83 
   0  -6   1   20.20    0.85 
   0  -6   1   20.64    0.93 
   0   6   1   19.70    0.86 
   0   6   1   18.93    0.72 
   0   6  -1   19.53    0.97 
   0  -6  -1   19.85    0.88 
   0  -6   1   20.12    0.86 
   0  -6   1   21.03    0.93 
   0   6  -1   20.47    0.81 
   0   6   1   20.50    0.86 
   0   6  -1   19.20    0.68 
   0   6  -1   20.04    0.86 
   0   6  -1   21.44    0.92 
   0   6  -1   21.47    0.91 
   0  -6   1   20.35    0.85 
   0   6   1   18.67    0.66 
   0  -6  -1   18.90    0.84 
   0  -6   1   20.52    0.91 
   0   6  -1   20.62    0.95 
   0   6   1   18.30    0.93 
   1  -6   1   28.31    1.15 
  -1   6   1   27.62    0.99 
   1   6  -1   28.15    1.24 
  -1  -6  -1   28.66    1.19 
  -1  -6  -1   28.98    1.13 
  -1   6   1   26.91    1.11 
  -1  -6  -1   29.11    1.15 
   1  -6   1   29.03    1.09 
   1  -6   1   30.20    1.13 
   1   6  -1   29.73    1.20 
   1   6  -1   29.61    1.01 
  -1   6   1   28.92    1.22 
  -1  -6  -1   28.20    1.15 
   1  -6   1   27.98    1.19 
  -1  -6  -1   30.09    1.14 
   1   6  -1   30.14    1.17 
  -1   6   1   29.02    1.10 
  -1  -6  -1   29.95    1.17 
   1   6  -1   29.21    1.14 
   1  -6   1   29.11    1.12 
  -1   6   1   27.57    1.22 
  -1   6   1   28.14    1.08 
   1   6  -1   29.85    1.18 
  -1  -6  -1   28.50    1.15 
   1  -6   1   28.90    1.05 
   1   6  -1   29.66    1.03 
   1  -6   1   31.29    1.26 
   1  -6  -1   27.27    1.05 
  -1   6  -1   27.50    1.13 
   1  -6  -1   28.82    1.12 
   1  -6  -1   28.55    1.08 
   1   6   1   27.68    1.01 
  -1  -6   1   29.58    1.14 
  -1   6  -1   28.04    1.23 
   1  -6  -1   27.07    1.15 
  -1   6  -1   27.53    1.15 
  -1  -6   1   28.72    1.14 
   1   6   1   28.82    1.25 
   1  -6  -1   27.88    1.06 
   1   6   1   29.00    1.12 
  -1   6  -1   28.93    1.06 
  -1   6  -1   28.33    1.11 
  -1  -6   1   26.60    1.12 
  -1  -6   1   28.72    1.19 
   1   6   1   28.50    1.14 
  -1  -6   1   26.98    1.14 
   1   6   1   28.53    0.93 
   1   6   1   28.97    1.15 
  -1  -6   1   29.07    1.20 
   1  -6  -1   27.75    1.15 
  -1   6  -1   27.09    1.19 
   1  -6  -1   26.73    1.20 
  -1  -6   1   29.43    1.10 
   1  -6  -1   28.84    1.11 
   1   6   1   28.56    1.21 
   2  -6   1   11.62    0.39 
   2  -6   1   12.33    0.69 
   2   6  -1   12.73    0.55 
   2  -6   1   12.09    0.73 
  -2   6   1   11.50    0.56 
   2   6  -1   11.39    0.67 
   2  -6   1   11.94    0.51 
  -2  -6  -1   12.33    0.67 
   2   6  -1   11.49    0.70 
  -2  -6  -1   12.21    0.71 
   2   6  -1   11.53    0.58 
  -2   6   1   10.87    0.60 
  -2  -6  -1   11.97    0.68 
  -2  -6  -1   12.06    0.66 
   2  -6   1   11.42    0.63 
  -2  -6  -1   12.92    0.67 
   2   6  -1   10.80    0.62 
  -2   6   1   11.87    0.70 
   2  -6   1   12.38    0.72 
   2  -6   1   13.24    0.60 
  -2   6   1   12.68    0.58 
  -2   6   1   12.80    0.72 
   2   6  -1   12.15    0.67 
  -2  -6  -1   11.71    0.61 
   2  -6   1   11.42    0.63 
   2  -6   1   12.62    0.63 
  -2  -6  -1   12.15    0.66 
  -2  -6   1   11.89    0.66 
   2   6   1   11.44    0.59 
  -2   6  -1   11.18    0.59 
  -2  -6   1   11.00    0.66 
  -2  -6   1   10.93    0.69 
   2  -6  -1   10.94    0.67 
  -2   6  -1   10.51    0.67 
  -2  -6   1   11.50    0.61 
   2  -6  -1   11.41    0.60 
  -2   6  -1   10.96    0.67 
   2  -6  -1   11.34    0.60 
  -2  -6   1   11.50    0.68 
  -2   6  -1   11.00    0.66 
   2  -6  -1   11.53    0.59 
  -2   6  -1   11.24    0.61 
  -2  -6   1   11.58    0.65 
   2  -6  -1   11.99    0.66 
   2   6   1   12.22    0.50 
  -2  -6   1   10.91    0.57 
   2   6   1   11.87    0.67 
  -2   6  -1   12.82    0.65 
   2  -6  -1   12.06    0.69 
  -2   6  -1   12.01    0.65 
   2  -6  -1   11.96    0.53 
   2   6   1   11.28    0.70 
   2  -6  -1   11.71    0.58 
   2  -6  -1   10.77    0.69 
   2   6   1   11.16    0.68 
   2   6   1   11.71    0.64 
  -3   6   1    9.77    0.67 
  -3  -6  -1    9.29    0.62 
   3  -6   1    9.52    0.55 
  -3   6   1    8.40    0.60 
  -3   6   1    9.33    0.56 
   3  -6   1    9.69    0.57 
  -3  -6  -1    9.00    0.52 
   3  -6   1    9.46    0.61 
   3  -6   1    9.04    0.56 
   3   6  -1   10.02    0.61 
   3   6  -1    9.35    0.62 
  -3   6   1    9.73    0.55 
  -3  -6  -1    9.11    0.61 
   3   6  -1    9.62    0.58 
   3   6  -1   10.10    0.64 
  -3  -6  -1    8.93    0.62 
   3  -6   1    9.84    0.57 
   3   6  -1    9.19    0.63 
  -3   6   1    9.45    0.62 
   3  -6   1    9.24    0.41 
   3  -6   1    9.47    0.38 
   3   6  -1    8.61    0.50 
   3  -6   1    9.37    0.66 
   3  -6   1    9.97    0.61 
   3  -6   1   10.59    0.60 
  -3   6   1    9.46    0.52 
  -3  -6  -1   10.15    0.61 
  -3  -6  -1    9.77    0.67 
   3  -6   1    9.38    0.67 
   3   6  -1    9.21    0.60 
  -3  -6  -1    9.50    0.61 
  -3   6  -1   10.21    0.64 
   3  -6  -1   10.69    0.64 
  -3   6  -1    9.76    0.58 
   3   6   1    8.72    0.62 
   3   6   1    9.39    0.63 
   3  -6  -1    9.23    0.62 
  -3   6  -1   10.72    0.61 
  -3   6  -1    9.18    0.64 
   3  -6  -1    8.94    0.64 
   3  -6  -1    9.40    0.52 
   3  -6  -1    9.11    0.66 
  -3  -6   1    9.70    0.57 
   3  -6  -1    9.94    0.39 
   3   6   1   10.02    0.63 
  -3  -6   1    9.69    0.63 
  -3   6  -1    9.58    0.58 
   3  -6  -1   10.62    0.44 
  -3   6  -1    9.94    0.64 
   3  -6  -1   10.58    0.55 
  -3  -6   1    9.11    0.48 
   3   6   1    9.55    0.59 
   3  -6  -1    8.84    0.52 
  -3   6  -1   10.74    0.61 
   3  -6  -1   10.75    0.57 
  -3  -6   1    9.56    0.62 
   3   6   1    9.14    0.60 
   3   6   1    9.75    0.49 
  -3  -6   1    9.28    0.60 
  -3  -6   1    9.22    0.63 
   3   6   1    8.99    0.62 
  -3  -6   1   11.02    0.70 
  -4  -6  -1  132.92    4.25 
  -4   6   1  137.29    4.22 
  -4  -6  -1  136.73    4.27 
   4   6  -1  136.24    4.11 
  -4  -6  -1  133.72    4.21 
   4   6  -1  136.62    4.24 
   4   6  -1  128.80    4.20 
   4  -6   1  128.11    4.12 
  -4  -6  -1  134.31    4.07 
   4  -6   1  134.97    4.26 
   4  -6   1  132.20    4.13 
  -4   6   1  135.81    4.20 
   4   6  -1  136.49    4.21 
   4  -6   1  133.41    4.24 
  -4  -6  -1  122.79    4.25 
   4  -6   1  137.22    3.97 
   4  -6   1  130.79    4.35 
  -4   6   1  133.08    4.37 
  -4  -6  -1  139.59    4.38 
   4   6  -1  128.38    4.21 
   4  -6   1  134.54    4.13 
   4   6  -1  129.24    4.25 
  -4   6   1  130.04    4.06 
  -4   6   1  127.93    4.06 
   4  -6   1  127.16    4.35 
  -4   6   1  129.50    4.26 
  -4  -6  -1  131.78    4.01 
   4  -6   1  140.32    4.19 
  -4  -6  -1  133.58    4.20 
   4   6  -1  129.16    4.26 
   4   6  -1  132.36    3.96 
  -4  -6   1  134.96    4.15 
  -4  -6   1  136.35    4.35 
   4  -6  -1  133.05    4.35 
  -4   6  -1  131.96    4.19 
   4  -6  -1  134.65    3.83 
  -4  -6   1  132.69    3.95 
   4   6   1  133.68    4.04 
  -4   6  -1  134.02    4.20 
   4  -6  -1  135.15    4.06 
  -4  -6   1  134.91    4.31 
   4  -6  -1  129.31    4.24 
   4   6   1  131.19    4.23 
   4   6   1  129.49    4.22 
   4  -6  -1  133.02    4.24 
  -4  -6   1  133.57    4.25 
   4   6   1  130.12    4.26 
   4  -6  -1  132.78    4.07 
  -4   6  -1  134.90    4.21 
   4  -6  -1  135.16    4.10 
  -4   6  -1  139.09    4.39 
  -4   6  -1  131.35    4.24 
  -4   6  -1  135.96    4.14 
   4   6   1  132.67    4.23 
  -4  -6   1  132.99    4.25 
   4  -6  -1  130.48    4.06 
   4  -6  -1  129.42    4.34 
   4   6   1  137.09    4.30 
   4  -6  -1  136.30    3.94 
   4   6   1  137.88    4.07 
  -4  -6   1  132.36    4.23 
   5  -6   1   10.29    0.63 
   5   6  -1   10.23    0.63 
   5   6  -1    8.95    0.68 
  -5   6   1    8.85    0.86 
   5   6  -1   11.21    0.72 
   5  -6   1   10.49    0.66 
   5  -6   1    9.76    0.62 
  -5   6   1   10.53    0.70 
   5  -6   1    9.51    0.75 
   5   6  -1    9.45    0.69 
  -5  -6  -1   10.06    0.72 
  -5  -6  -1    9.95    0.68 
  -5  -6  -1   10.19    0.72 
  -5   6   1    9.41    0.58 
  -5   6   1    9.40    0.58 
   5  -6   1    9.93    0.61 
  -5  -6  -1   10.65    0.62 
  -5  -6  -1   10.69    0.68 
   5   6  -1   10.09    0.46 
   5   6  -1   10.01    0.68 
   5  -6   1   10.17    0.69 
  -5   6   1   10.08    0.63 
   5   6  -1    8.28    0.59 
  -5  -6  -1   10.09    0.70 
   5  -6   1    9.48    0.53 
  -5  -6  -1   10.03    0.75 
   5   6  -1   10.56    0.71 
   5  -6   1   10.54    0.79 
  -5   6  -1    8.89    0.60 
  -5   6  -1    7.78    0.83 
   5  -6  -1    7.24    0.53 
   5   6   1    8.17    0.68 
  -5  -6   1    7.56    0.75 
   5   6   1    7.77    0.76 
  -5  -6   1    7.97    0.64 
  -5   6  -1    8.57    0.59 
  -5  -6   1    8.37    0.66 
   5  -6  -1    7.80    0.52 
  -5  -6   1    7.92    0.59 
  -5  -6   1    7.98    0.59 
  -5  -6   1    8.85    0.66 
   5   6   1    8.96    0.66 
   5   6   1    7.84    0.55 
   5  -6  -1    8.28    0.64 
   5  -6  -1    8.90    0.55 
   5  -6  -1    8.06    0.49 
   5  -6  -1    8.40    0.84 
  -5   6  -1    8.43    0.66 
   5  -6  -1    8.56    0.71 
  -5  -6   1   10.34    0.96 
   5   6   1    7.97    0.59 
   5   6   1    8.12    0.50 
   5  -6  -1    8.22    0.55 
   5   6   1    8.23    0.65 
   5   6   1    7.80    0.63 
  -6  -6  -1   31.24    1.51 
   6   6  -1   28.95    1.25 
   6  -6   1   29.20    1.19 
  -6   6   1   28.21    1.20 
  -6  -6  -1   30.65    1.35 
  -6  -6  -1   29.23    1.36 
  -6   6   1   26.84    1.35 
  -6   6   1   29.74    1.21 
   6   6  -1   28.77    1.36 
   6   6  -1   28.89    1.34 
  -6   6   1   27.71    1.46 
   6  -6   1   29.36    1.49 
   6  -6   1   29.45    1.28 
   6   6  -1   28.55    1.28 
   6  -6   1   30.68    1.48 
   6   6  -1   29.60    1.41 
  -6  -6  -1   28.20    1.39 
  -6  -6  -1   31.66    1.44 
   6  -6   1   28.38    1.35 
  -6  -6  -1   28.67    1.38 
   6   6  -1   28.09    1.39 
  -6  -6  -1   29.14    1.29 
   6  -6   1   26.68    1.23 
  -6  -6   1   27.47    1.34 
   6   6   1   28.53    1.37 
  -6   6  -1   26.33    1.23 
   6  -6  -1   29.47    1.18 
  -6  -6   1   24.03    1.36 
   6  -6  -1   25.92    1.15 
   6  -6  -1   28.58    1.43 
  -6  -6   1   25.79    1.35 
   6   6   1   27.69    1.39 
  -6  -6   1   26.30    1.33 
  -6   6  -1   25.70    1.42 
   6   6   1   25.05    1.35 
   6  -6  -1   27.93    1.36 
  -6  -6   1   29.33    1.31 
   6   6   1   28.30    1.35 
   6   6   1   28.99    1.24 
  -6  -6   1   26.93    1.34 
  -6   6  -1   27.40    1.19 
   6  -6  -1   26.12    1.18 
   6   6   1   28.64    1.10 
  -6   6  -1   24.17    1.31 
   6  -6  -1   28.77    1.28 
   6   6   1   26.51    1.23 
  -6  -6   1   27.21    1.29 
   6   6   1   26.74    1.36 
   6  -6  -1   26.53    1.44 
   7  -6   1   21.08    1.34 
  -7  -6  -1   23.44    1.31 
   7   6  -1   22.29    1.19 
   7   6  -1   22.20    1.25 
   7  -6   1   22.38    1.14 
  -7  -6  -1   24.41    1.24 
   7   6  -1   21.23    1.28 
   7   6  -1   23.18    1.30 
   7  -6   1   21.20    1.14 
  -7  -6  -1   22.88    1.20 
  -7   6   1   22.44    1.12 
   7  -6   1   20.98    1.28 
  -7   6   1   21.31    1.27 
   7  -6   1   22.45    1.11 
   7   6  -1   24.21    1.26 
   7  -6   1   24.84    1.30 
  -7  -6  -1   23.06    1.29 
  -7  -6  -1   26.08    1.31 
  -7   6   1   21.37    1.34 
   7   6  -1   23.97    1.10 
  -7   6  -1   25.84    1.35 
   7   6   1   26.47    1.14 
   7  -6  -1   26.60    1.15 
   7  -6  -1   24.81    1.14 
  -7  -6   1   26.41    1.29 
   7  -6  -1   23.39    1.39 
   7   6   1   25.16    1.36 
  -7  -6   1   25.33    1.33 
   7  -6  -1   25.20    1.11 
   7   6   1   25.36    1.36 
  -7  -6   1   27.90    1.30 
   7  -6  -1   25.76    1.36 
  -7  -6   1   24.90    1.29 
  -7  -6   1   24.77    1.32 
   7   6   1   25.03    1.31 
  -7   6  -1   25.73    1.45 
   7  -6  -1   23.52    1.29 
   7   6   1   25.39    1.30 
  -7   6  -1   24.72    1.19 
  -8   6   1   55.95    2.17 
   8   6  -1   53.80    2.40 
   8  -6   1   56.12    2.17 
  -8  -6  -1   58.74    2.43 
   8  -6   1   56.19    2.52 
   8   6  -1   54.64    2.27 
  -8  -6  -1   57.59    2.38 
   8  -6   1   55.25    2.39 
  -8  -6  -1   59.55    2.32 
   8  -6   1   59.83    2.21 
   8   6  -1   57.34    2.31 
  -8  -6  -1   54.49    2.28 
   8   6  -1   57.23    2.43 
  -8   6   1   54.19    2.39 
   8   6  -1   57.53    2.34 
   8  -6   1   55.17    2.35 
  -8   6   1   56.78    2.53 
  -8  -6  -1   56.53    2.34 
   8  -6   1   58.04    2.23 
   8   6   1   56.72    2.34 
   8  -6  -1   54.58    2.12 
   8  -6  -1   52.13    2.46 
  -8  -6   1   56.39    2.33 
   8   6   1   56.96    2.44 
  -8   6  -1   53.06    2.48 
  -8   6  -1   54.43    2.19 
  -8  -6   1   56.18    2.37 
   8  -6  -1   60.28    2.20 
  -8  -6   1   56.70    2.38 
  -8   6  -1   54.25    2.38 
  -8  -6   1   57.63    2.34 
   8   6   1   57.33    2.37 
  -8  -6   1   56.31    2.29 
   8  -6  -1   57.88    2.39 
   8  -6  -1   53.27    2.06 
   8   6   1   57.11    2.45 
   8  -6  -1   51.75    2.33 
   9   6  -1   20.64    1.34 
   9  -6   1   20.30    1.30 
  -9  -6  -1   20.99    1.30 
   9   6  -1   21.29    1.35 
   9  -6   1   22.31    1.45 
   9  -6   1   19.80    1.16 
   9   6  -1   20.17    1.24 
  -9  -6  -1   24.15    1.34 
  -9  -6  -1   22.06    1.32 
   9  -6   1   21.22    1.15 
  -9   6   1   20.40    1.34 
  -9   6   1   22.90    1.21 
  -9  -6  -1   23.17    1.41 
   9   6  -1   20.87    1.29 
  -9  -6  -1   23.16    1.31 
   9  -6   1   21.79    1.34 
  -9   6   1   19.13    1.37 
  -9  -6   1   21.30    1.33 
   9   6   1   21.15    1.28 
   9  -6  -1   18.96    1.38 
   9  -6  -1   22.22    1.32 
   9   6   1   19.80    1.33 
  -9  -6   1   21.66    1.32 
  -9   6  -1   19.15    1.33 
  -9   6  -1   19.46    1.18 
   9  -6  -1   18.33    1.26 
   9  -6  -1   19.15    1.05 
   9   6   1   20.93    1.31 
   9  -6  -1   16.65    1.06 
  -9  -6   1   20.68    1.28 
   9  -6  -1   20.56    1.12 
  -9  -6   1   21.76    1.28 
   9   6   1   20.40    1.34 
  -9   6  -1   19.74    1.40 
  -9  -6   1   19.23    1.24 
  10   6  -1    8.07    1.06 
  10   6  -1    7.07    0.95 
 -10  -6  -1    7.71    0.95 
 -10   6   1    8.14    1.06 
 -10  -6  -1    8.33    0.97 
  10  -6   1    8.04    1.12 
 -10  -6  -1    8.98    1.10 
  10  -6   1    6.91    0.91 
 -10  -6  -1    8.34    1.02 
  10   6  -1    6.74    0.86 
 -10   6   1    6.61    1.01 
  10  -6   1    8.93    1.06 
 -10   6   1    7.69    0.86 
 -10  -6  -1    8.09    0.96 
  10  -6   1    8.20    0.88 
  10  -6   1    8.17    0.84 
  10  -6   1    7.20    0.95 
  10   6  -1    7.18    0.90 
  10  -6  -1    9.17    1.06 
 -10  -6   1    7.13    0.96 
 -10  -6   1    8.49    1.06 
  10  -6  -1    7.84    0.95 
 -10   6  -1    7.98    0.91 
 -10  -6   1    7.24    0.93 
  10  -6  -1    7.77    0.83 
  10  -6  -1    8.01    1.12 
  10   6   1    7.44    0.93 
 -10  -6   1    7.52    0.94 
 -10   6  -1    5.39    0.92 
 -10  -6   1    6.94    0.93 
  10  -6  -1    8.10    0.80 
  10   6   1    7.21    0.99 
  10   6   1   10.30    1.13 
 -10   6  -1    8.70    1.11 
  10   6   1    9.70    1.19 
  11  -6   1   11.07    1.09 
 -11   6   1    9.04    1.21 
 -11  -6  -1    9.54    1.19 
 -11  -6  -1    9.08    1.08 
 -11   6   1    9.51    1.04 
 -11  -6  -1   10.30    1.16 
  11   6  -1    8.35    1.00 
 -11  -6  -1   10.72    1.24 
 -11  -6  -1    8.85    1.09 
  11  -6   1    7.92    1.03 
  11  -6   1    8.39    0.91 
  11   6  -1    8.55    1.14 
  11   6  -1   10.36    1.26 
  11  -6   1    8.02    1.19 
 -11   6   1    7.91    1.17 
  11   6  -1    9.43    1.10 
 -11   6  -1    9.56    1.19 
  11   6   1   10.25    1.27 
 -11  -6   1   11.59    1.22 
  11   6   1    9.39    1.10 
 -11   6  -1    8.77    1.22 
  11  -6  -1    9.97    1.32 
  11   6   1    8.03    1.01 
 -11  -6   1   11.37    1.25 
  11   6   1    8.99    1.19 
 -11   6  -1    8.83    1.01 
  11  -6  -1    9.25    1.14 
  11  -6  -1    7.68    0.87 
 -11  -6   1    7.83    1.03 
 -11  -6   1   10.83    1.23 
  11  -6  -1    9.25    0.75 
 -11  -6   1   10.64    1.17 
  12   6  -1   11.65    1.27 
  12  -6   1    8.89    1.35 
 -12  -6  -1    8.90    1.11 
  12   6  -1   11.20    1.32 
  12  -6   1    8.63    1.00 
 -12  -6  -1    8.05    1.05 
  12   6  -1    9.44    1.27 
 -12   6   1    7.69    1.19 
 -12   6   1    9.85    1.30 
 -12  -6  -1   11.65    1.30 
  12  -6   1    8.96    0.96 
 -12   6   1    7.99    1.02 
  12   6  -1    9.08    1.09 
 -12  -6  -1   10.09    1.24 
  12  -6   1    9.42    1.18 
 -12  -6  -1    8.89    1.22 
 -12  -6   1    8.88    1.22 
 -12   6  -1    8.76    1.28 
 -12  -6   1    9.30    1.15 
 -12   6  -1    9.69    1.13 
  12   6   1    9.11    1.14 
 -12  -6   1    8.53    1.16 
  12  -6  -1    8.94    1.17 
  12   6   1    9.25    1.22 
 -12  -6   1    8.68    1.10 
  12   6   1   10.76    1.25 
  12  -6  -1    8.54    0.96 
  12   6   1    8.65    1.21 
  12  -6  -1    8.93    0.89 
 -12   6  -1    6.88    1.13 
  12  -6  -1    8.69    1.30 
 -12  -6   1    9.27    1.23 
 -13   6   1    5.16    1.01 
  13  -6   1    4.62    0.91 
  13  -6   1    4.66    1.03 
 -13  -6  -1    5.53    0.96 
  13   6  -1    3.92    0.78 
  13   6  -1    3.58    0.84 
  13   6  -1    5.61    1.02 
  13  -6   1    6.21    0.91 
  13   6  -1    4.95    0.87 
 -13  -6  -1    4.42    0.91 
 -13   6   1    4.44    0.81 
  13  -6   1    3.34    0.65 
 -13  -6  -1    6.79    1.11 
 -13   6  -1    3.76    0.86 
 -13   6  -1    4.92    1.05 
  13  -6  -1    5.55    1.10 
  13  -6  -1    4.52    0.89 
 -13  -6   1    5.29    1.00 
  13   6   1    4.78    0.87 
  13  -6  -1    4.95    0.68 
  13   6   1    5.53    1.03 
  13   6   1    3.86    0.82 
 -13  -6   1    4.96    0.97 
  13   6   1    6.29    1.02 
 -13  -6   1    5.68    0.99 
  13  -6  -1    5.35    0.79 
 -13   6  -1    4.94    0.88 
   0  -7   1   53.40    1.87 
   0  -7  -1   53.79    1.94 
   0   7  -1   54.18    2.00 
   0   7   1   56.35    2.07 
   0   7  -1   55.28    2.07 
   0  -7  -1   53.48    1.97 
   0   7   1   53.32    1.63 
   0   7   1   56.73    1.92 
   0   7  -1   54.56    1.95 
   0  -7  -1   53.31    1.92 
   0   7   1   54.95    1.91 
   0  -7   1   55.68    1.89 
   0   7  -1   54.14    1.65 
   0  -7  -1   53.38    1.87 
   0  -7   1   53.66    1.88 
   0   7   1   51.75    1.71 
   0  -7   1   53.39    1.95 
   0  -7   1   51.92    1.88 
   0  -7  -1   56.87    1.91 
   0  -7   1   52.76    1.96 
   0  -7   1   53.53    1.98 
   0   7   1   51.64    1.85 
   0   7  -1   51.17    1.88 
   0  -7  -1   56.89    1.87 
   0   7  -1   55.81    1.82 
   0  -7  -1   51.96    1.92 
  -1  -7  -1   19.19    0.90 
   1   7  -1   19.15    0.92 
  -1   7   1   17.85    0.96 
   1   7  -1   18.87    0.95 
   1  -7   1   19.23    0.91 
   1  -7   1   18.89    0.87 
  -1   7   1   19.98    0.88 
  -1  -7  -1   18.10    0.89 
  -1   7   1   18.87    0.74 
   1   7  -1   19.40    0.77 
   1  -7   1   19.02    0.98 
   1   7  -1   18.65    0.91 
  -1   7   1   17.69    0.96 
  -1   7   1   19.05    0.89 
  -1  -7  -1   18.59    0.90 
  -1  -7  -1   20.16    0.90 
  -1  -7  -1   18.50    0.90 
   1   7  -1   19.17    1.00 
   1  -7   1   19.29    0.88 
   1   7  -1   18.65    0.74 
   1  -7   1   18.49    0.94 
   1  -7   1   18.07    0.80 
   1  -7   1   20.72    0.86 
  -1  -7  -1   18.01    0.93 
  -1  -7  -1   18.08    0.86 
   1   7  -1   17.99    0.88 
  -1   7   1   18.11    0.84 
  -1   7  -1   19.34    0.98 
  -1  -7   1   18.77    0.89 
  -1  -7   1   18.72    0.85 
   1   7   1   18.59    0.68 
  -1  -7   1   18.97    0.90 
   1  -7  -1   19.72    0.88 
   1  -7  -1   19.20    0.90 
  -1   7  -1   17.91    0.86 
  -1  -7   1   19.59    0.96 
   1  -7  -1   19.17    0.92 
   1   7   1   17.83    0.86 
  -1  -7   1   18.31    0.89 
   1  -7  -1   16.98    0.80 
   1  -7  -1   18.74    0.90 
   1  -7  -1   18.10    0.95 
   1   7   1   18.52    0.90 
   1   7   1   19.22    1.00 
  -1  -7   1   19.55    0.90 
   1   7   1   18.94    0.97 
   1  -7  -1   18.08    0.87 
  -1   7  -1   20.03    0.93 
   1   7   1   17.38    0.73 
  -1   7  -1   17.98    0.97 
  -1  -7   1   19.40    0.96 
   1  -7  -1   18.21    0.84 
   1   7   1   19.96    0.91 
  -1   7  -1   19.46    0.90 
  -1   7  -1   19.16    0.82 
   2   7  -1  340.02    9.89 
  -2  -7  -1  332.83    9.85 
   2  -7   1  351.48    9.81 
   2  -7   1  340.00    9.96 
  -2   7   1  323.91    9.71 
   2  -7   1  337.77   10.01 
  -2  -7  -1  341.95    9.87 
  -2  -7  -1  343.24    9.82 
  -2   7   1  330.40    9.94 
   2   7  -1  340.89    9.84 
   2   7  -1  345.27   10.02 
   2  -7   1  340.48    9.84 
  -2  -7  -1  350.14    9.86 
   2   7  -1  340.38    9.65 
  -2  -7  -1  341.84    9.92 
   2  -7   1  358.39    9.75 
  -2  -7  -1  349.77    9.87 
   2   7  -1  336.48    9.91 
   2  -7   1  342.10    9.84 
  -2  -7  -1  326.89    9.94 
   2  -7   1  333.95    9.63 
  -2   7   1  339.29    9.69 
  -2   7   1  326.07    9.96 
   2   7  -1  342.13    9.72 
  -2   7   1  327.83    9.79 
   2   7  -1  348.44    9.89 
  -2   7  -1  332.87    9.80 
   2  -7  -1  334.68    9.78 
   2  -7  -1  336.05    9.78 
  -2  -7   1  340.37    9.79 
  -2   7  -1  326.54    9.85 
   2   7   1  336.30    9.86 
   2  -7  -1  340.92    9.87 
  -2  -7   1  324.99    9.76 
  -2   7  -1  338.20    9.73 
   2   7   1  331.70    9.92 
   2   7   1  331.65    9.82 
  -2  -7   1  340.02    9.91 
   2  -7  -1  350.24    9.74 
   2  -7  -1  325.09    9.98 
  -2  -7   1  340.85    9.97 
   2  -7  -1  324.62    9.73 
   2   7   1  329.33    9.71 
  -2  -7   1  339.25    9.85 
   2   7   1  316.78    9.96 
   2  -7  -1  337.69    9.65 
   2   7   1  336.43    9.57 
  -2   7  -1  344.23    9.93 
  -2  -7   1  335.43    9.93 
  -2   7  -1  344.62    9.99 
   2  -7  -1  335.19    9.95 
  -2   7  -1  342.67    9.84 
   2   7   1  338.45    9.88 
  -2  -7   1  346.92    9.88 
  -2   7  -1  328.73    9.92 
  -3   7   1    6.36    0.48 
   3   7  -1    7.27    0.54 
   3   7  -1    7.52    0.56 
   3  -7   1    7.67    0.76 
   3  -7   1    7.76    0.63 
   3  -7   1    7.07    0.49 
   3  -7   1    7.01    0.52 
  -3  -7  -1    7.18    0.57 
   3  -7   1    8.04    0.56 
   3   7  -1    7.35    0.70 
   3  -7   1    7.20    0.30 
   3   7  -1    7.31    0.45 
  -3   7   1    6.96    0.48 
   3   7  -1    6.70    0.49 
  -3  -7  -1    7.10    0.57 
   3  -7   1    7.04    0.51 
   3  -7   1    6.93    0.35 
   3  -7   1    7.10    0.51 
  -3  -7  -1    6.59    0.53 
  -3  -7  -1    7.22    0.54 
  -3   7   1    7.28    0.47 
  -3   7   1    6.22    0.66 
  -3   7   1    6.74    0.67 
  -3  -7  -1    6.97    0.54 
  -3  -7  -1    8.48    0.80 
   3   7  -1    6.84    0.67 
  -3   7   1    7.16    0.50 
   3  -7   1    7.69    0.57 
  -3   7   1    6.64    0.65 
  -3  -7  -1    7.55    0.48 
  -3  -7   1    7.38    0.61 
  -3  -7   1    7.36    0.51 
  -3   7  -1    7.78    0.59 
   3  -7  -1    7.50    0.47 
  -3   7  -1    7.35    0.58 
   3  -7  -1    6.53    0.53 
   3   7   1    7.61    0.59 
   3   7   1    7.37    0.58 
  -3   7  -1    6.64    0.51 
  -3  -7   1    6.78    0.54 
   3   7   1    6.49    0.68 
  -3  -7   1    7.82    0.47 
  -3  -7   1    7.88    0.59 
   3  -7  -1    7.31    0.49 
   3  -7  -1    7.18    0.27 
   3  -7  -1    7.69    0.61 
   3  -7  -1    7.28    0.48 
  -3  -7   1    7.73    0.58 
   3   7   1    6.33    0.49 
   3  -7  -1    7.26    0.38 
   3   7   1    6.84    0.54 
   3  -7  -1    7.14    0.50 
  -3   7  -1    7.99    0.54 
  -3   7  -1    6.93    0.52 
  -3   7  -1    7.00    0.67 
  -3   7  -1    7.15    0.51 
   3  -7  -1    6.77    0.72 
  -3   7  -1    6.52    0.51 
   3   7   1    6.81    0.40 
   3   7   1    7.37    0.56 
   3  -7  -1    6.87    0.67 
  -3  -7   1    6.03    0.62 
  -4  -7  -1   35.19    1.51 
   4  -7   1   35.52    1.64 
   4   7  -1   35.17    1.53 
  -4   7   1   35.57    1.53 
   4  -7   1   37.23    1.25 
   4   7  -1   36.94    1.52 
  -4   7   1   36.21    1.41 
  -4   7   1   34.46    1.56 
  -4   7   1   34.93    1.48 
   4  -7   1   34.98    1.65 
   4  -7   1   37.28    1.45 
   4  -7   1   38.15    1.51 
  -4  -7  -1   36.07    1.38 
  -4  -7  -1   37.01    1.56 
  -4  -7  -1   35.93    1.52 
   4   7  -1   35.34    1.57 
   4  -7   1   35.80    1.46 
   4  -7   1   35.78    1.46 
   4   7  -1   36.54    1.58 
  -4  -7  -1   35.34    1.62 
  -4   7   1   36.36    1.64 
  -4  -7  -1   35.08    1.56 
  -4  -7  -1   37.18    1.38 
   4  -7   1   37.52    1.58 
   4   7  -1   36.22    1.41 
   4  -7   1   33.20    1.51 
  -4  -7  -1   36.39    1.60 
  -4   7   1   34.33    1.41 
   4   7  -1   35.73    1.56 
   4   7  -1   37.51    1.53 
   4   7   1   38.97    1.62 
   4  -7  -1   39.28    1.42 
  -4  -7   1   38.13    1.66 
   4  -7  -1   38.02    1.20 
  -4   7  -1   38.60    1.57 
  -4  -7   1   37.98    1.58 
   4  -7  -1   38.73    1.45 
   4  -7  -1   37.81    1.42 
  -4   7  -1   38.68    1.52 
   4   7   1   39.50    1.42 
   4   7   1   40.49    1.58 
   4   7   1   39.97    1.63 
  -4   7  -1   38.13    1.66 
   4  -7  -1   39.98    1.23 
   4  -7  -1   39.34    1.61 
  -4  -7   1   37.72    1.55 
  -4  -7   1   37.70    1.59 
   4   7   1   38.73    1.38 
   4  -7  -1   37.20    1.42 
  -4  -7   1   37.00    1.61 
  -4   7  -1   37.74    1.50 
  -4   7  -1   36.66    1.58 
   4   7   1   39.33    1.55 
   4  -7  -1   37.39    1.56 
  -4   7  -1   39.74    1.57 
   4  -7  -1   36.99    1.42 
   4  -7  -1   39.35    1.69 
  -4  -7   1   38.19    1.49 
   4   7   1   39.08    1.61 
  -4  -7   1   38.13    1.34 
   4  -7  -1   36.77    1.66 
   5   7  -1    4.40    0.51 
  -5  -7  -1    3.72    0.57 
  -5  -7  -1    3.17    0.50 
  -5   7   1    4.20    0.63 
   5  -7   1    4.15    0.39 
   5   7  -1    3.57    0.53 
  -5   7   1    3.51    0.49 
   5   7  -1    3.63    0.51 
  -5  -7  -1    4.08    0.54 
  -5  -7  -1    4.69    0.61 
   5  -7   1    3.23    0.55 
  -5   7   1    3.65    0.54 
   5  -7   1    3.53    0.45 
   5  -7   1    3.35    0.51 
   5   7  -1    4.55    0.58 
   5  -7   1    4.03    0.63 
   5   7  -1    3.80    0.52 
   5   7  -1    3.17    0.47 
  -5  -7  -1    4.00    0.47 
  -5  -7  -1    4.18    0.54 
   5   7  -1    4.02    0.31 
  -5   7   1    3.25    0.46 
  -5   7   1    2.80    0.38 
  -5  -7  -1    3.52    0.59 
   5  -7   1    4.03    0.48 
   5   7  -1    4.35    0.60 
   5   7   1    4.75    0.65 
   5   7   1    4.13    0.58 
   5  -7  -1    3.47    0.42 
   5  -7  -1    3.29    0.51 
   5   7   1    3.56    0.55 
   5   7   1    3.73    0.49 
  -5  -7   1    3.57    0.56 
  -5   7  -1    3.90    0.61 
   5  -7  -1    4.64    0.48 
  -5  -7   1    3.52    0.55 
   5  -7  -1    3.43    0.57 
   5  -7  -1    4.96    0.52 
  -5   7  -1    4.64    0.54 
  -5  -7   1    4.16    0.64 
   5   7   1    3.55    0.43 
  -5  -7   1    4.63    0.59 
  -5  -7   1    3.52    0.47 
   5  -7  -1    3.58    0.30 
   5  -7  -1    4.23    0.51 
  -5   7  -1    3.91    0.48 
   5  -7  -1    3.29    0.53 
  -5  -7   1    3.78    0.53 
   5  -7  -1    3.17    0.53 
   5   7   1    4.31    0.44 
  -5   7  -1    3.44    0.50 
  -5  -7   1    4.05    0.37 
   5   7   1    3.02    0.49 
   5   7   1    3.88    0.51 
  -5   7  -1    4.87    0.63 
  -6  -7  -1    4.68    0.66 
   6   7  -1    4.34    0.57 
  -6  -7  -1    4.83    0.66 
  -6   7   1    4.36    0.51 
  -6  -7  -1    5.66    0.60 
  -6  -7  -1    4.68    0.73 
   6  -7   1    5.02    0.76 
   6  -7   1    4.69    0.68 
   6   7  -1    4.23    0.62 
  -6   7   1    5.26    0.69 
  -6   7   1    3.19    0.58 
   6  -7   1    4.33    0.53 
  -6  -7  -1    4.93    0.63 
   6   7  -1    5.02    0.59 
   6   7  -1    4.94    0.57 
  -6  -7  -1    5.18    0.65 
  -6   7   1    5.31    0.58 
  -6  -7  -1    4.45    0.64 
   6  -7   1    5.28    0.67 
   6   7  -1    4.82    0.64 
   6  -7   1    5.44    0.51 
   6   7  -1    4.80    0.64 
   6  -7   1    4.42    0.55 
   6  -7  -1    5.74    0.43 
  -6  -7   1    4.59    0.65 
  -6   7  -1    4.60    0.67 
   6   7   1    4.48    0.64 
  -6   7  -1    4.82    0.55 
  -6  -7   1    4.97    0.65 
  -6  -7   1    5.38    0.75 
   6   7   1    6.23    0.65 
   6  -7  -1    5.08    0.72 
  -6  -7   1    4.75    0.58 
   6   7   1    4.76    0.65 
   6  -7  -1    5.07    0.54 
   6  -7  -1    4.71    0.51 
  -6  -7   1    5.52    0.64 
   6   7   1    6.10    0.61 
  -6  -7   1    6.16    0.72 
  -6   7  -1    6.20    0.72 
   6   7   1    5.66    0.68 
  -6  -7   1    5.47    0.67 
   6   7   1    4.89    0.67 
  -6   7  -1    5.28    0.59 
   6  -7  -1    5.45    0.73 
   6  -7  -1    5.34    0.69 
   7   7  -1   10.37    1.05 
   7   7  -1    9.70    0.96 
  -7  -7  -1    7.22    0.84 
  -7   7   1    7.48    0.63 
   7  -7   1    9.58    0.62 
  -7  -7  -1    8.95    0.84 
   7  -7   1    8.19    0.89 
   7  -7   1    9.39    0.68 
   7   7  -1    9.50    0.72 
   7   7  -1    9.37    0.94 
   7   7  -1    9.55    0.89 
   7  -7   1   10.43    1.12 
   7   7  -1    8.81    0.64 
   7  -7   1    7.94    0.79 
  -7   7   1    8.84    1.02 
  -7  -7  -1    9.69    0.77 
  -7   7   1    8.46    0.92 
  -7  -7  -1    7.66    0.90 
   7  -7   1    8.67    0.94 
  -7  -7  -1    8.53    0.86 
  -7   7   1    8.37    0.66 
   7   7   1    9.79    0.98 
  -7   7  -1   11.46    1.06 
  -7  -7   1   11.56    1.08 
   7   7   1    9.77    1.00 
  -7   7  -1    8.34    0.99 
  -7  -7   1    8.57    0.84 
   7  -7  -1    7.95    0.62 
   7   7   1   10.87    1.07 
  -7  -7   1    8.68    0.85 
  -7   7  -1    8.56    0.68 
   7  -7  -1   10.07    0.63 
   7  -7  -1    9.00    0.95 
   7  -7  -1    8.14    0.99 
   7  -7  -1    7.52    0.58 
  -7   7  -1    9.20    0.70 
   7  -7  -1    8.34    0.89 
  -7  -7   1    9.00    0.94 
   7   7   1    7.68    0.81 
   7   7   1    9.03    0.65 
  -7  -7   1   11.44    1.07 
   8  -7   1    2.00    0.48 
   8   7  -1    2.22    0.47 
   8   7  -1    2.49    0.54 
  -8   7   1    1.71    0.50 
  -8   7   1    1.82    0.50 
   8  -7   1    1.69    0.39 
   8   7  -1    2.17    0.52 
  -8  -7  -1    2.54    0.52 
   8  -7   1    1.87    0.51 
   8  -7   1    1.90    0.41 
  -8  -7  -1    1.80    0.44 
   8   7  -1    1.47    0.42 
  -8  -7  -1    2.10    0.49 
   8  -7   1    3.71    0.52 
  -8  -7  -1    1.85    0.52 
  -8   7   1    1.89    0.40 
   8   7  -1    1.69    0.45 
   8   7   1    2.30    0.52 
  -8  -7   1    1.91    0.48 
   8  -7  -1    1.75    0.35 
   8  -7  -1    1.49    0.45 
   8   7   1    1.70    0.52 
   8   7   1    1.85    0.45 
  -8  -7   1    2.27    0.50 
   8  -7  -1    1.74    0.54 
  -8   7  -1    0.98    0.43 
  -8  -7   1    1.75    0.42 
  -8  -7   1    1.67    0.50 
  -8   7  -1    2.27    0.55 
  -8   7  -1    1.96    0.44 
   8   7   1    1.48    0.46 
   8  -7  -1    1.60    0.38 
  -8  -7   1    2.47    0.56 
   8  -7  -1    1.80    0.47 
   9   7  -1    1.08    0.38 
   9   7  -1    0.28    0.31 
   9   7  -1    0.78    0.37 
   9  -7   1    0.45    0.35 
  -9   7   1    0.29    0.27 
   9  -7   1   -0.08    0.25 
  -9  -7  -1    0.57    0.31 
   9  -7   1    0.29    0.26 
   9  -7   1    0.92    0.34 
  -9  -7  -1    0.68    0.39 
  -9  -7  -1    0.26    0.30 
   9   7  -1    0.36    0.31 
  -9  -7  -1   -0.15    0.25 
  -9  -7  -1    0.29    0.28 
  -9   7   1    0.12    0.36 
  -9   7   1    0.40    0.33 
   9  -7   1    0.85    0.37 
  -9  -7   1    0.31    0.26 
   9   7   1    0.60    0.33 
  -9   7  -1    0.16    0.27 
  -9   7  -1    0.81    0.39 
  -9   7  -1    0.27    0.35 
   9  -7  -1    0.29    0.21 
   9  -7  -1    0.29    0.33 
   9  -7  -1   -0.13    0.29 
  -9  -7   1    0.23    0.28 
   9  -7  -1    0.49    0.27 
  -9  -7   1    0.37    0.40 
  -9  -7   1    0.35    0.33 
   9   7   1    0.36    0.29 
   9  -7  -1    0.20    0.32 
   9   7   1    0.48    0.35 
  -9  -7   1    0.46    0.32 
   9   7   1    0.52    0.34 
  10  -7   1    2.80    0.73 
  10   7  -1    3.67    0.68 
  10  -7   1    4.35    0.75 
  10  -7   1    3.24    0.56 
 -10  -7  -1    3.64    0.68 
 -10  -7  -1    5.32    0.89 
  10  -7   1    4.43    0.78 
 -10   7   1    3.65    0.62 
  10   7  -1    3.27    0.70 
 -10  -7  -1    4.36    0.74 
 -10  -7  -1    5.70    0.83 
  10   7  -1    4.07    0.76 
 -10   7   1    2.69    0.70 
 -10   7   1    3.80    0.76 
  10   7  -1    3.58    0.70 
  10  -7   1    4.31    0.66 
 -10  -7  -1    6.00    0.88 
 -10  -7   1    3.97    0.74 
 -10   7  -1    3.72    0.67 
  10  -7  -1    6.43    0.89 
  10   7   1    5.80    0.91 
 -10   7  -1    5.60    0.91 
  10  -7  -1    3.88    0.62 
  10   7   1    3.17    0.65 
 -10  -7   1    4.90    0.75 
 -10   7  -1    4.30    0.83 
 -10  -7   1    4.69    0.82 
 -10  -7   1    4.59    0.81 
  10  -7  -1    4.37    0.89 
  10  -7  -1    3.38    0.68 
  10   7   1    3.60    0.73 
 -10  -7   1    4.83    0.82 
  10   7   1    4.28    0.76 
  10  -7  -1    4.18    0.57 
 -11   7   1    1.21    0.54 
  11  -7   1    1.19    0.51 
 -11   7   1    1.15    0.54 
  11   7  -1    0.95    0.46 
  11  -7   1    1.52    0.48 
 -11  -7  -1    3.02    0.69 
 -11  -7  -1    1.60    0.51 
  11  -7   1    1.62    0.51 
 -11  -7  -1    1.85    0.53 
  11  -7   1    1.08    0.37 
 -11  -7  -1    1.53    0.52 
  11   7  -1    1.52    0.50 
 -11   7   1    1.43    0.48 
  11  -7   1    1.25    0.59 
  11   7  -1    1.76    0.53 
  11   7  -1    0.63    0.45 
  11  -7  -1    0.96    0.40 
  11   7   1    0.68    0.41 
 -11   7  -1    0.97    0.54 
 -11   7  -1    1.10    0.51 
  11  -7  -1    1.66    0.42 
  11   7   1    0.58    0.41 
 -11  -7   1    1.74    0.55 
 -11  -7   1    1.87    0.58 
  11   7   1    1.47    0.55 
 -11  -7   1    1.75    0.55 
 -11   7  -1    1.79    0.54 
 -11  -7   1    2.02    0.62 
  11   7   1    0.76    0.43 
  11  -7  -1    0.94    0.44 
  11  -7  -1    0.50    0.50 
 -11  -7   1    1.38    0.48 
 -12   7   1    2.66    0.78 
  12   7  -1    1.72    0.67 
 -12  -7  -1    2.22    0.60 
 -12   7   1    2.71    0.61 
  12   7  -1    3.11    0.77 
  12   7  -1    2.39    0.65 
  12  -7   1    2.31    0.59 
  12   7  -1    3.52    0.71 
  12  -7   1    1.60    0.58 
  12  -7   1    3.53    0.63 
 -12   7   1    2.71    0.80 
 -12  -7  -1    2.74    0.69 
 -12  -7  -1    2.78    0.66 
 -12  -7  -1    3.17    0.76 
  12  -7   1    3.92    0.91 
  12  -7  -1    2.60    0.65 
 -12  -7   1    3.24    0.73 
 -12  -7   1    3.20    0.79 
 -12  -7   1    3.39    0.74 
 -12   7  -1    2.95    0.68 
  12   7   1    3.39    0.74 
  12  -7  -1    2.00    0.73 
  12   7   1    2.01    0.64 
  12  -7  -1    2.59    0.50 
 -12  -7   1    3.45    0.88 
 -12   7  -1    2.63    0.76 
 -12   7  -1    3.28    0.77 
  12   7   1    2.61    0.75 
  12  -7  -1    2.44    0.55 
  12   7   1    2.86    0.74 
  13   7  -1    0.96    0.51 
  13   7  -1    0.90    0.49 
 -13   7   1    1.70    0.71 
 -13   7   1    1.20    0.51 
  13  -7   1    1.81    0.56 
  13  -7   1    0.86    0.38 
  13  -7   1    1.19    0.55 
 -13   7   1   -0.09    0.47 
  13   7  -1    0.40    0.38 
  13  -7   1    0.91    0.57 
  13   7  -1    0.59    0.47 
 -13   7  -1    0.58    0.47 
  13   7   1    1.60    0.57 
  13   7   1    1.00    0.53 
  13   7   1    0.14    0.44 
 -13  -7   1    0.58    0.48 
  13   7   1    0.49    0.48 
  13  -7  -1    1.05    0.57 
  13  -7  -1    0.88    0.39 
 -13   7  -1    0.59    0.47 
  13  -7  -1    1.23    0.39 
 -13  -7   1    1.35    0.57 
  13  -7  -1    1.05    0.55 
 -13   7  -1    0.89    0.47 
   0  -8  -1   10.24    0.71 
   0   8   1    9.99    0.51 
   0   8   1    9.83    0.42 
   0  -8   1   10.50    0.64 
   0   8  -1   10.09    0.72 
   0  -8   1   12.23    0.74 
   0   8   1   10.59    0.74 
   0   8   1   10.91    0.64 
   0   8  -1   11.45    0.79 
   0   8   1   11.10    0.78 
   0  -8   1   11.79    0.67 
   0   8  -1   10.68    0.68 
   0  -8   1   10.27    0.69 
   0   8  -1   11.63    0.60 
   0  -8   1   10.55    0.65 
   0   8  -1   11.26    0.70 
   0   8  -1   11.31    0.45 
   0  -8  -1   10.72    0.64 
   0  -8  -1   11.13    0.70 
   0  -8  -1   11.56    0.64 
   0   8   1   11.22    0.67 
   0  -8  -1   11.53    0.70 
   0  -8   1   11.15    0.64 
   0  -8  -1   11.47    0.68 
   0   8  -1   10.63    0.66 
   0  -8   1   11.58    0.72 
   0  -8  -1    9.50    0.63 
   0   8   1    9.95    0.65 
   1  -8   1   11.35    0.66 
   1  -8   1   11.30    0.74 
  -1   8   1    9.94    0.52 
  -1   8   1   10.83    0.74 
   1   8  -1    9.48    0.64 
  -1  -8  -1    9.52    0.64 
  -1   8   1    9.36    0.72 
  -1   8   1    9.32    0.60 
   1  -8   1    9.94    0.69 
   1  -8   1   10.14    0.66 
  -1  -8  -1    9.55    0.63 
   1   8  -1    9.93    0.64 
   1  -8   1   10.08    0.58 
   1  -8   1   11.20    0.62 
  -1   8   1    9.95    0.64 
  -1  -8  -1   10.59    0.65 
  -1  -8  -1    9.56    0.65 
   1  -8   1    9.53    0.61 
  -1  -8  -1   10.40    0.67 
   1   8  -1   10.72    0.69 
  -1   8   1   10.67    0.64 
   1   8  -1   10.01    0.75 
  -1  -8  -1    9.75    0.64 
  -1  -8  -1   10.88    0.71 
   1   8  -1   10.04    0.50 
   1   8  -1   10.45    0.71 
   1   8  -1    9.95    0.52 
  -1   8  -1    9.92    0.57 
   1  -8  -1    9.72    0.70 
  -1  -8   1    9.72    0.69 
  -1  -8   1    9.11    0.63 
   1   8   1    9.95    0.63 
   1  -8  -1    9.23    0.62 
   1  -8  -1    9.20    0.62 
   1  -8  -1   10.82    0.68 
  -1   8  -1    9.98    0.63 
  -1  -8   1    9.96    0.65 
  -1  -8   1   10.36    0.65 
   1   8   1    9.78    0.44 
  -1  -8   1   10.35    0.69 
  -1   8  -1   10.36    0.68 
   1  -8  -1   10.21    0.59 
  -1   8  -1   10.89    0.74 
   1   8   1    9.26    0.63 
  -1   8  -1   11.12    0.78 
   1   8   1   10.88    0.68 
   1  -8  -1   11.01    0.64 
   1   8   1    8.99    0.68 
  -1  -8   1    8.86    0.63 
   1  -8  -1    9.84    0.60 
  -1   8  -1   10.97    0.66 
  -1  -8   1    9.75    0.61 
   1   8   1    9.63    0.49 
   1   8   1   10.28    0.75 
   2   8  -1    1.15    0.32 
  -2   8   1    1.58    0.27 
  -2  -8  -1    1.44    0.34 
   2  -8   1    1.32    0.29 
  -2  -8  -1    1.04    0.31 
   2  -8   1    1.48    0.36 
  -2   8   1    1.19    0.29 
  -2  -8  -1    0.80    0.27 
   2  -8   1    1.49    0.35 
  -2  -8  -1    0.97    0.26 
   2   8  -1    1.39    0.22 
   2   8  -1    1.33    0.25 
  -2   8   1    1.70    0.39 
   2   8  -1    1.56    0.33 
   2  -8   1    1.78    0.33 
   2   8  -1    1.26    0.28 
   2  -8   1    1.39    0.29 
  -2  -8  -1    0.79    0.25 
  -2   8   1    1.66    0.34 
   2  -8   1    1.16    0.23 
   2   8  -1    1.01    0.33 
   2   8  -1    0.99    0.29 
  -2   8   1    1.07    0.31 
  -2  -8  -1    0.90    0.26 
   2  -8   1    1.35    0.23 
  -2  -8  -1    1.03    0.26 
   2   8   1    0.97    0.22 
  -2  -8   1    0.98    0.29 
  -2   8  -1    1.50    0.33 
  -2   8  -1    1.08    0.25 
  -2  -8   1    1.10    0.31 
   2   8   1    0.68    0.27 
   2   8   1    0.95    0.17 
   2  -8  -1    1.03    0.26 
  -2  -8   1    1.14    0.27 
   2   8   1    0.51    0.28 
  -2   8  -1    1.33    0.29 
   2  -8  -1    0.64    0.28 
   2  -8  -1    0.92    0.24 
  -2  -8   1    1.15    0.29 
   2   8   1    0.37    0.22 
   2   8   1    0.71    0.26 
   2   8   1    1.14    0.29 
  -2   8  -1    1.33    0.30 
  -2  -8   1    1.31    0.32 
   2  -8  -1    1.35    0.26 
  -2   8  -1    1.38    0.36 
  -2   8  -1    0.94    0.30 
   2  -8  -1    1.20    0.23 
   2  -8  -1    1.13    0.26 
  -2  -8   1    1.34    0.29 
   2  -8  -1    1.17    0.31 
   2  -8  -1    1.39    0.34 
  -2  -8   1    1.21    0.26 
   3  -8   1   48.75    1.83 
  -3  -8  -1   51.94    1.89 
   3   8  -1   49.07    1.78 
  -3  -8  -1   49.49    1.90 
   3   8  -1   49.43    1.90 
   3   8  -1   46.50    1.90 
  -3  -8  -1   49.07    1.88 
   3   8  -1   49.19    1.68 
  -3  -8  -1   47.85    1.77 
  -3  -8  -1   48.30    1.94 
   3  -8   1   48.06    1.98 
  -3   8   1   50.17    1.97 
  -3   8   1   50.51    1.76 
   3  -8   1   48.38    1.57 
   3   8  -1   49.12    1.86 
  -3   8   1   48.50    1.74 
  -3  -8  -1   47.56    1.97 
   3  -8   1   43.93    1.97 
   3  -8   1   47.90    1.85 
   3   8  -1   46.73    1.95 
  -3  -8  -1   48.53    1.88 
  -3   8   1   48.35    1.96 
  -3   8   1   46.80    1.95 
  -3   8   1   46.65    1.79 
   3  -8   1   50.91    1.82 
  -3  -8   1   51.45    1.92 
   3  -8  -1   49.12    1.89 
  -3  -8   1   47.14    1.96 
   3  -8  -1   46.13    1.98 
   3   8   1   49.23    1.90 
   3  -8  -1   49.83    1.99 
   3   8   1   47.45    1.97 
   3   8   1   48.92    1.62 
   3  -8  -1   45.61    1.73 
  -3  -8   1   48.23    1.80 
   3  -8  -1   49.53    1.61 
  -3   8  -1   48.74    1.95 
  -3   8  -1   48.10    1.85 
  -3   8  -1   46.54    1.81 
   3  -8  -1   49.41    1.75 
  -3  -8   1   47.66    1.74 
  -3   8  -1   47.90    1.94 
  -3   8  -1   44.64    1.91 
   3   8   1   46.59    1.77 
  -3  -8   1   46.56    1.86 
  -3   8  -1   47.12    1.76 
   3  -8  -1   48.67    1.78 
   3   8   1   46.91    1.84 
  -3  -8   1   46.04    1.90 
   3  -8  -1   48.03    1.93 
  -3  -8   1   46.32    1.92 
  -3   8  -1   49.75    1.85 
   3  -8  -1   47.86    1.79 
  -4  -8  -1    7.25    0.73 
  -4   8   1    8.45    0.82 
  -4  -8  -1    7.84    0.62 
   4   8  -1    8.77    0.83 
   4  -8   1    5.69    0.59 
  -4   8   1    8.28    0.59 
   4   8  -1    7.66    0.52 
  -4   8   1    8.55    0.81 
  -4  -8  -1    8.21    0.64 
  -4   8   1    8.09    0.58 
   4  -8   1    9.08    0.85 
   4   8  -1    9.72    0.89 
   4   8  -1    8.20    0.64 
  -4  -8  -1    7.25    0.80 
  -4   8   1    9.38    0.90 
  -4  -8  -1    8.18    0.78 
   4  -8   1    8.10    0.64 
   4  -8   1    8.76    0.89 
   4  -8   1    7.19    0.57 
  -4  -8  -1    8.02    0.81 
   4  -8   1    7.51    0.81 
   4   8  -1    7.83    0.77 
   4  -8   1    7.34    0.36 
   4   8  -1    6.34    0.54 
   4   8  -1    7.06    0.75 
  -4  -8  -1    8.20    0.51 
   4  -8   1    6.46    0.55 
  -4  -8  -1    7.57    0.52 
  -4   8   1    7.51    0.57 
   4  -8  -1    8.30    0.57 
   4   8   1    7.75    0.49 
   4  -8  -1    8.05    0.58 
  -4   8  -1    7.92    0.61 
   4   8   1    6.88    0.75 
   4  -8  -1    8.59    0.41 
   4   8   1    9.06    0.67 
  -4  -8   1    8.01    0.83 
   4   8   1    7.72    0.79 
   4   8   1    8.01    0.81 
   4  -8  -1    8.03    0.84 
  -4  -8   1    7.25    0.73 
  -4   8  -1    7.62    0.79 
  -4  -8   1    8.60    0.84 
   4  -8  -1    9.23    0.86 
  -4   8  -1    7.33    0.78 
   4  -8  -1    8.70    0.79 
   4  -8  -1    8.24    0.56 
  -4  -8   1    7.27    0.48 
  -4  -8   1    7.25    0.71 
   4  -8  -1    7.91    0.55 
   4  -8  -1    8.43    0.87 
   4  -8  -1    8.18    0.55 
  -4   8  -1    8.06    0.72 
  -4   8  -1    8.29    0.78 
  -4  -8   1    7.50    0.57 
   4   8   1    7.71    0.77 
  -4  -8   1    7.57    0.78 
   4   8   1    8.39    0.62 
  -4   8  -1    7.42    0.60 
  -5  -8  -1   16.21    1.02 
   5   8  -1   15.68    0.98 
  -5   8   1   16.94    0.96 
   5   8  -1   17.15    0.88 
   5  -8   1   14.79    1.05 
  -5   8   1   15.17    1.05 
   5   8  -1   16.44    1.00 
  -5   8   1   15.61    0.88 
   5   8  -1   16.20    0.97 
  -5  -8  -1   16.21    0.81 
   5   8  -1   15.12    0.99 
   5  -8   1   15.45    0.89 
   5  -8   1   15.50    0.90 
  -5  -8  -1   15.05    0.95 
   5   8  -1   15.40    1.00 
  -5   8   1   15.85    1.01 
   5   8  -1   15.68    0.75 
  -5  -8  -1   15.64    1.02 
  -5  -8  -1   16.66    0.97 
  -5  -8  -1   17.11    1.09 
   5  -8   1   15.60    0.99 
  -5   8   1   16.11    0.97 
   5   8  -1   15.57    0.94 
  -5  -8  -1   16.73    1.00 
  -5  -8  -1   15.83    0.84 
   5  -8   1   16.59    1.09 
   5   8   1   17.74    0.85 
   5   8   1   18.71    1.02 
   5   8   1   17.79    0.84 
   5  -8  -1   15.68    1.06 
  -5  -8   1   16.77    0.75 
  -5   8  -1   17.72    1.05 
  -5   8  -1   18.20    0.97 
  -5  -8   1   17.78    1.08 
   5  -8  -1   17.13    1.01 
   5   8   1   19.02    1.10 
   5  -8  -1   17.63    0.88 
  -5  -8   1   17.84    1.02 
  -5   8  -1   17.64    1.00 
   5   8   1   18.62    1.07 
  -5  -8   1   19.21    0.97 
  -5  -8   1   17.64    1.11 
   5  -8  -1   17.64    0.88 
  -5   8  -1   17.88    1.11 
  -5  -8   1   17.86    1.04 
  -5   8  -1   16.44    0.95 
   5   8   1   19.14    1.05 
   5  -8  -1   18.12    1.05 
   5   8   1   17.59    1.03 
   5   8   1   19.53    1.10 
   5  -8  -1   17.20    1.11 
  -5  -8   1   16.09    1.01 
  -6  -8  -1    3.84    0.62 
   6   8  -1    2.03    0.45 
  -6   8   1    2.27    0.54 
  -6  -8  -1    2.41    0.49 
  -6  -8  -1    2.32    0.46 
  -6  -8  -1    2.88    0.54 
   6  -8   1    2.92    0.54 
   6   8  -1    2.43    0.48 
   6  -8   1    1.82    0.38 
  -6   8   1    2.26    0.41 
  -6   8   1    2.41    0.50 
   6   8  -1    2.73    0.45 
  -6  -8  -1    3.31    0.48 
   6  -8   1    2.73    0.57 
   6  -8   1    2.95    0.47 
  -6   8   1    3.11    0.48 
   6   8  -1    2.91    0.50 
  -6   8   1    2.19    0.46 
  -6  -8  -1    2.05    0.46 
   6   8  -1    1.76    0.47 
  -6  -8  -1    3.21    0.61 
   6  -8   1    2.46    0.57 
  -6   8  -1    3.19    0.49 
   6  -8  -1    3.16    0.58 
  -6   8  -1    4.20    0.63 
  -6   8  -1    2.94    0.56 
  -6  -8   1    2.82    0.56 
  -6  -8   1    3.30    0.50 
   6  -8  -1    2.90    0.62 
   6  -8  -1    3.15    0.55 
   6   8   1    3.45    0.60 
   6   8   1    3.95    0.62 
  -6  -8   1    2.80    0.53 
   6   8   1    4.59    0.63 
  -6  -8   1    3.02    0.54 
   6  -8  -1    3.47    0.45 
  -6  -8   1    3.57    0.52 
   6   8   1    3.24    0.55 
  -6  -8   1    4.06    0.71 
  -6   8  -1    3.79    0.54 
   6   8   1    3.99    0.49 
   6  -8  -1    4.09    0.51 
  -6   8  -1    3.67    0.59 
   7   8  -1   42.19    1.89 
   7  -8   1   40.81    2.02 
   7  -8   1   40.85    1.78 
  -7  -8  -1   43.29    1.91 
  -7  -8  -1   45.49    1.94 
  -7  -8  -1   40.44    1.96 
  -7  -8  -1   43.87    1.80 
   7   8  -1   42.24    1.81 
   7  -8   1   39.50    1.89 
   7   8  -1   44.29    1.96 
   7   8  -1   44.65    1.98 
  -7   8   1   42.02    1.75 
   7   8  -1   41.40    1.79 
   7  -8   1   41.24    2.07 
  -7   8   1   43.87    2.09 
   7  -8   1   40.01    1.73 
  -7   8   1   42.18    1.77 
  -7  -8  -1   45.20    2.02 
   7   8  -1   39.48    1.95 
  -7   8   1   46.86    1.99 
  -7  -8   1   43.45    1.86 
   7   8   1   43.13    1.97 
   7  -8  -1   41.62    1.95 
  -7   8  -1   38.64    1.76 
   7  -8  -1   41.54    2.01 
  -7   8  -1   40.73    2.07 
   7   8   1   45.76    2.00 
   7   8   1   45.48    1.85 
   7  -8  -1   41.83    1.68 
  -7   8  -1   42.76    1.93 
  -7  -8   1   44.55    1.85 
  -7   8  -1   40.42    1.75 
   7   8   1   44.97    2.04 
  -7  -8   1   43.70    1.99 
  -7  -8   1   44.77    2.03 
  -7   8  -1   40.31    1.93 
   7  -8  -1   39.60    1.70 
   7   8   1   44.32    1.94 
  -7  -8   1   41.68    1.93 
   7  -8  -1   39.53    2.05 
   8  -8   1    2.73    0.49 
  -8  -8  -1    3.26    0.61 
   8  -8   1    2.82    0.60 
  -8  -8  -1    2.32    0.52 
   8   8  -1    2.55    0.56 
   8   8  -1    2.46    0.54 
   8   8  -1    2.55    0.57 
  -8  -8  -1    3.22    0.57 
   8  -8   1    2.98    0.68 
   8  -8   1    2.71    0.51 
  -8   8   1    2.53    0.47 
  -8  -8  -1    2.82    0.60 
   8   8  -1    3.45    0.58 
   8   8  -1    2.97    0.56 
  -8   8   1    2.69    0.61 
  -8  -8  -1    3.20    0.62 
   8  -8   1    2.34    0.56 
  -8   8   1    2.61    0.60 
   8  -8  -1    2.93    0.65 
   8   8   1    4.80    0.72 
  -8  -8   1    3.26    0.63 
   8  -8  -1    3.09    0.49 
   8   8   1    3.71    0.64 
   8  -8  -1    2.96    0.45 
  -8   8  -1    2.16    0.58 
  -8   8  -1    4.12    0.72 
   8   8   1    4.26    0.75 
   8   8   1    3.26    0.61 
   8  -8  -1    4.06    0.70 
   8  -8  -1    3.21    0.63 
  -8  -8   1    2.98    0.61 
  -8  -8   1    3.03    0.54 
  -8  -8   1    4.19    0.66 
  -8   8  -1    3.88    0.58 
  -8  -8   1    4.70    0.74 
   9   8  -1   23.53    1.44 
   9   8  -1   20.14    1.43 
   9  -8   1   22.05    1.42 
   9   8  -1   24.59    1.42 
   9   8  -1   23.01    1.46 
   9  -8   1   23.19    1.50 
  -9  -8  -1   22.91    1.40 
  -9  -8  -1   24.01    1.48 
  -9  -8  -1   21.54    1.36 
   9  -8   1   22.22    1.57 
  -9   8   1   23.57    1.47 
   9  -8   1   22.94    1.30 
   9  -8   1   22.90    1.25 
  -9  -8  -1   24.97    1.53 
  -9   8   1   21.87    1.26 
  -9   8   1   21.35    1.53 
  -9  -8  -1   25.49    1.40 
  -9  -8   1   26.04    1.55 
  -9   8  -1   21.88    1.56 
  -9  -8   1   22.41    1.45 
  -9   8  -1   22.57    1.46 
   9   8   1   22.37    1.44 
   9   8   1   23.70    1.49 
   9  -8  -1   24.68    1.50 
   9  -8  -1   23.86    1.25 
  -9   8  -1   23.84    1.34 
  -9  -8   1   24.75    1.41 
   9   8   1   22.70    1.40 
   9  -8  -1   25.51    1.51 
  -9  -8   1   23.50    1.36 
   9  -8  -1   22.46    1.56 
   9  -8  -1   23.57    1.18 
   9   8   1   22.45    1.49 
  -9  -8   1   23.80    1.46 
  10   8  -1    4.09    0.77 
  10  -8   1    3.32    0.57 
 -10  -8  -1    5.53    0.84 
  10  -8   1    4.79    0.72 
 -10   8   1    3.95    0.84 
 -10  -8  -1    3.90    0.70 
 -10   8   1    4.21    0.65 
  10  -8   1    4.66    0.82 
  10   8  -1    3.39    0.73 
  10   8  -1    3.98    0.70 
 -10  -8  -1    4.14    0.78 
 -10  -8  -1    5.22    0.82 
  10   8  -1    3.95    0.76 
 -10   8   1    4.58    0.84 
  10  -8   1    3.86    0.74 
  10  -8   1    3.93    0.85 
  10  -8  -1    5.34    0.85 
  10   8   1    4.02    0.81 
 -10  -8   1    4.14    0.79 
  10  -8  -1    2.81    0.64 
  10   8   1    5.08    0.81 
  10  -8  -1    3.87    0.86 
 -10  -8   1    4.16    0.78 
  10  -8  -1    3.85    0.55 
  10   8   1    5.00    0.90 
  10  -8  -1    3.13    0.58 
  10   8   1    4.93    0.82 
 -10   8  -1    3.85    0.66 
 -10   8  -1    4.33    0.82 
 -10   8  -1    3.31    0.74 
 -10  -8   1    4.52    0.75 
 -10  -8   1    3.95    0.77 
 -10  -8   1    3.56    0.66 
 -11   8   1   22.99    1.63 
  11  -8   1   21.00    1.37 
  11   8  -1   23.20    1.51 
  11  -8   1   22.28    1.29 
  11   8  -1   21.27    1.58 
 -11   8   1   21.70    1.38 
  11   8  -1   22.36    1.53 
  11  -8   1   22.59    1.54 
 -11  -8  -1   26.56    1.62 
 -11   8   1   23.44    1.73 
  11   8  -1   22.77    1.64 
  11  -8   1   24.64    1.82 
 -11  -8  -1   23.08    1.53 
  11  -8   1   22.99    1.57 
 -11  -8  -1   22.18    1.55 
 -11  -8   1   22.36    1.56 
  11   8   1   22.58    1.55 
 -11  -8   1   23.38    1.56 
 -11  -8   1   28.09    1.65 
  11  -8  -1   22.42    1.34 
 -11  -8   1   21.80    1.64 
 -11   8  -1   23.77    1.62 
  11  -8  -1   22.03    1.54 
  11  -8  -1   21.45    1.19 
 -11   8  -1   23.86    1.77 
  11   8   1   22.84    1.53 
  11   8   1   21.80    1.61 
  11  -8  -1   19.92    1.65 
  11   8   1   21.14    1.56 
 -11   8  -1   21.18    1.41 
  11  -8  -1   24.67    1.60 
 -12   8   1    5.68    1.01 
 -12  -8  -1    4.40    0.87 
  12   8  -1    3.64    0.77 
  12  -8   1    4.65    0.74 
  12  -8   1    4.65    1.07 
 -12   8   1    6.08    1.13 
 -12  -8  -1    4.55    0.87 
  12  -8   1    4.18    0.65 
  12   8  -1    5.69    1.03 
 -12   8   1    5.04    0.82 
  12   8  -1    7.70    1.18 
  12   8  -1    5.15    0.87 
  12  -8   1    6.36    1.06 
 -12   8  -1    6.17    0.90 
  12  -8  -1    4.76    0.74 
  12   8   1    4.73    0.89 
 -12  -8   1    5.55    1.00 
 -12  -8   1    6.79    1.02 
  12   8   1    4.71    0.93 
 -12   8  -1    5.42    1.01 
 -12  -8   1    4.44    0.86 
  12   8   1    5.95    0.91 
  12  -8  -1    6.41    1.03 
  12  -8  -1    5.31    1.02 
 -12   8  -1    4.35    0.97 
  12  -8  -1    5.17    0.66 
  12   8   1    5.30    0.98 
  13   8  -1    3.15    0.73 
  13   8  -1    4.12    0.85 
 -13   8   1    4.01    0.92 
  13   8  -1    3.35    0.81 
 -13   8   1    4.59    0.82 
 -13  -8  -1    3.50    0.81 
  13  -8   1    4.21    0.72 
  13  -8   1    3.30    0.82 
  13  -8   1    2.50    0.53 
 -13   8   1    4.50    0.95 
  13  -8   1    3.06    0.76 
  13   8  -1    5.15    0.90 
  13  -8  -1    4.48    0.70 
  13  -8  -1    5.09    1.03 
 -13  -8   1    4.87    0.94 
  13  -8  -1    4.82    0.95 
 -13   8  -1    4.60    0.84 
  13   8   1    4.47    0.92 
 -13   8  -1    3.76    0.93 
 -13   8  -1    3.65    0.90 
  13   8   1    4.62    0.91 
  13   8   1    4.17    0.84 
 -13  -8   1    4.90    0.96 
  13  -8  -1    3.34    0.54 
  13   8   1    2.80    0.83 
   0  -9   1   31.62    1.42 
   0  -9  -1   31.40    1.36 
   0  -9  -1   31.03    1.33 
   0  -9   1   32.98    1.37 
   0  -9  -1   33.12    1.41 
   0   9   1   30.66    1.47 
   0  -9  -1   30.55    1.42 
   0   9   1   30.26    1.51 
   0   9  -1   31.48    1.52 
   0   9  -1   32.42    1.23 
   0   9  -1   32.05    1.47 
   0  -9   1   30.80    1.32 
   0   9  -1   31.34    1.05 
   0   9   1   29.64    1.00 
   0  -9   1   31.41    1.33 
   0  -9   1   34.43    1.37 
   0  -9  -1   31.99    1.32 
   0   9   1   31.41    1.37 
   0   9  -1   34.23    1.43 
   0   9  -1   32.19    1.37 
   0   9   1   32.33    1.14 
   0  -9  -1   31.74    1.33 
   0   9   1   29.30    1.31 
   0  -9   1   31.69    1.44 
   0   9  -1   31.97    1.39 
   0  -9   1   33.94    1.46 
   0  -9  -1   32.12    1.41 
   0   9   1   31.40    1.37 
  -1  -9  -1   84.57    3.01 
   1   9  -1   85.44    3.02 
   1  -9   1   84.65    3.00 
   1  -9   1   86.69    3.07 
   1  -9   1   84.97    3.11 
  -1  -9  -1   89.89    2.98 
  -1   9   1   91.68    2.99 
  -1  -9  -1   89.48    3.09 
  -1  -9  -1   91.35    3.03 
   1   9  -1   83.51    3.00 
  -1   9   1   83.48    2.91 
   1  -9   1   86.99    2.86 
   1  -9   1   86.08    2.95 
   1  -9   1   86.70    2.95 
   1   9  -1   85.86    2.70 
  -1   9   1   86.98    3.14 
   1   9  -1   86.53    3.18 
   1  -9   1   90.45    2.93 
   1   9  -1   82.41    3.05 
  -1   9   1   89.27    2.77 
   1   9  -1   86.15    2.97 
  -1  -9  -1   91.21    2.98 
  -1  -9  -1   88.97    3.01 
   1   9  -1   87.29    2.76 
  -1  -9  -1   87.46    3.00 
  -1   9   1   89.07    3.00 
  -1   9   1   88.76    3.19 
  -1   9  -1   88.48    3.03 
  -1  -9   1   89.98    2.99 
  -1  -9   1   94.80    3.02 
   1   9   1   89.30    3.20 
  -1  -9   1   90.41    3.03 
   1  -9  -1   85.81    2.87 
   1  -9  -1   88.13    3.00 
  -1   9  -1   83.38    2.94 
  -1   9  -1   91.98    3.16 
  -1  -9   1   84.58    3.07 
  -1  -9   1   88.42    3.01 
  -1  -9   1   88.24    2.94 
  -1  -9   1   86.05    3.06 
   1  -9  -1   85.20    3.02 
   1   9   1   84.96    3.10 
  -1   9  -1   92.44    3.03 
  -1   9  -1   89.08    3.19 
   1  -9  -1   86.31    3.11 
   1   9   1   87.29    2.70 
   1   9   1   85.40    2.96 
   1  -9  -1   85.68    2.98 
   1   9   1   88.71    3.02 
   1  -9  -1   91.25    2.94 
   1   9   1   87.13    2.65 
   1   9   1   88.75    3.01 
  -1   9  -1   91.35    2.86 
   2   9  -1   21.57    0.94 
  -2   9   1   21.29    1.20 
   2  -9   1   22.60    1.20 
  -2  -9  -1   22.11    1.18 
   2  -9   1   20.51    1.08 
  -2   9   1   21.83    1.19 
  -2  -9  -1   22.78    1.14 
   2  -9   1   22.70    0.95 
   2   9  -1   23.03    1.12 
  -2  -9  -1   22.63    1.15 
   2  -9   1   21.95    1.07 
  -2   9   1   22.02    1.10 
  -2   9   1   24.11    1.14 
  -2  -9  -1   24.26    1.13 
  -2  -9  -1   23.30    1.13 
   2   9  -1   22.72    0.91 
  -2  -9  -1   22.20    1.08 
  -2   9   1   23.80    0.96 
   2   9  -1   22.16    1.14 
   2  -9   1   21.43    1.21 
   2  -9   1   21.44    1.08 
  -2  -9  -1   24.19    1.14 
   2   9  -1   22.75    1.13 
   2   9  -1   21.32    1.21 
   2   9  -1   23.80    1.20 
  -2  -9   1   21.85    1.10 
  -2  -9   1   23.08    1.06 
  -2   9  -1   21.28    1.06 
   2   9   1   20.50    1.06 
  -2  -9   1   21.87    1.06 
   2  -9  -1   23.36    1.14 
   2  -9  -1   21.64    1.17 
   2   9   1   22.80    0.84 
  -2   9  -1   21.91    1.18 
  -2   9  -1   22.82    1.14 
  -2  -9   1   22.76    1.17 
  -2   9  -1   24.26    1.13 
   2   9   1   21.62    0.95 
   2   9   1   21.57    1.12 
  -2   9  -1   22.57    1.23 
   2   9   1   22.38    1.18 
   2   9   1   23.02    1.13 
   2  -9  -1   22.19    1.21 
  -2   9  -1   23.21    1.01 
  -2  -9   1   21.51    1.18 
  -2  -9   1   22.72    1.12 
   2  -9  -1   23.07    0.97 
   2   9   1   22.63    1.24 
   2  -9  -1   23.12    1.05 
  -2  -9   1   22.49    1.15 
   2  -9  -1   21.53    1.07 
   3   9  -1   71.22    2.31 
  -3   9   1   69.00    2.66 
  -3  -9  -1   69.80    2.45 
  -3  -9  -1   72.63    2.58 
   3  -9   1   72.05    2.53 
  -3  -9  -1   73.29    2.70 
   3  -9   1   70.64    2.48 
  -3   9   1   66.66    2.48 
   3   9  -1   71.04    2.55 
   3   9  -1   71.51    2.59 
  -3  -9  -1   65.55    2.52 
   3   9  -1   70.36    2.42 
   3   9  -1   68.87    2.61 
   3  -9   1   71.03    2.24 
  -3   9   1   70.92    2.39 
   3   9  -1   72.29    2.71 
  -3  -9  -1   73.90    2.61 
   3  -9   1   72.02    2.55 
   3  -9   1   70.47    2.73 
  -3   9   1   72.10    2.68 
   3  -9   1   69.70    2.69 
  -3   9   1   67.39    2.64 
  -3  -9  -1   65.34    2.58 
   3   9  -1   72.66    2.64 
  -3  -9  -1   71.43    2.55 
   3   9   1   70.93    2.43 
  -3  -9   1   71.59    2.50 
  -3   9  -1   70.59    2.67 
  -3  -9   1   68.67    2.62 
   3   9   1   73.04    2.73 
   3  -9  -1   68.04    2.70 
  -3  -9   1   71.38    2.69 
   3   9   1   72.22    2.56 
   3   9   1   70.00    2.64 
  -3  -9   1   69.84    2.58 
   3   9   1   73.33    2.63 
  -3   9  -1   70.48    2.56 
  -3   9  -1   64.90    2.60 
  -3  -9   1   71.12    2.57 
   3  -9  -1   67.61    2.45 
   3  -9  -1   71.09    2.28 
  -3  -9   1   71.69    2.44 
  -3  -9   1   69.11    2.61 
   3  -9  -1   69.58    2.56 
   3   9   1   69.12    2.24 
   3  -9  -1   67.81    2.65 
  -3   9  -1   69.06    2.64 
   3   9   1   72.62    2.60 
   3  -9  -1   69.11    2.43 
  -3   9  -1   68.51    2.42 
   4   9  -1   10.65    0.81 
  -4  -9  -1   10.60    0.82 
   4   9  -1   10.94    0.84 
   4  -9   1   11.19    0.78 
  -4  -9  -1   11.76    0.63 
   4   9  -1   10.88    0.77 
   4   9  -1   10.73    0.72 
  -4   9   1   11.78    0.88 
   4  -9   1   11.48    0.74 
  -4  -9  -1    9.81    0.76 
  -4  -9  -1   10.74    0.67 
  -4   9   1   10.53    1.01 
  -4  -9  -1   10.49    0.75 
  -4  -9  -1   11.44    0.82 
   4  -9   1   11.58    0.76 
  -4  -9  -1   12.31    0.83 
   4  -9   1   10.51    0.87 
  -4   9   1   11.65    0.73 
   4  -9   1   10.85    0.83 
  -4  -9  -1   10.56    0.85 
   4   9  -1   15.08    0.93 
  -4   9   1   11.15    0.84 
   4   9  -1   10.05    0.77 
   4  -9   1   10.47    0.72 
   4   9  -1   11.32    0.65 
  -4   9   1    9.82    0.70 
   4  -9   1   10.03    0.98 
   4  -9  -1   10.89    0.70 
   4   9   1   10.60    0.82 
  -4   9  -1   11.89    0.79 
  -4   9  -1   12.80    0.89 
   4  -9  -1   11.49    0.72 
   4  -9  -1   12.50    0.83 
   4   9   1   11.87    0.81 
   4   9   1   11.57    0.83 
   4  -9  -1   11.88    0.89 
  -4  -9   1   11.69    0.85 
  -4  -9   1   12.13    0.86 
   4   9   1   12.43    0.76 
  -4  -9   1   12.84    0.77 
  -4   9  -1   12.60    0.87 
   4  -9  -1   11.64    0.88 
   4  -9  -1   11.38    0.71 
  -4   9  -1   11.95    0.75 
   4   9   1   12.22    0.63 
   4  -9  -1   11.50    0.86 
  -4   9  -1   12.28    0.89 
  -4  -9   1   11.27    0.80 
  -4  -9   1   12.42    0.84 
   4   9   1   13.06    0.88 
  -4  -9   1   11.86    0.87 
   4   9   1   10.37    0.81 
  -4  -9   1   11.74    0.66 
  -5   9   1    4.78    0.68 
  -5  -9  -1    4.75    0.53 
   5   9  -1    5.50    0.74 
  -5   9   1    5.50    0.72 
   5   9  -1    5.84    0.59 
   5  -9   1    5.58    0.74 
  -5   9   1    5.13    0.75 
   5  -9   1    4.78    0.66 
   5  -9   1    4.96    0.60 
   5  -9   1    4.64    0.71 
  -5   9   1    4.91    0.58 
  -5   9   1    5.58    0.65 
   5   9  -1    5.14    0.67 
  -5  -9  -1    5.85    0.76 
  -5   9   1    4.42    0.58 
  -5  -9  -1    4.64    0.69 
  -5  -9  -1    5.43    0.55 
   5   9  -1    5.49    0.67 
  -5  -9  -1    5.43    0.67 
   5   9  -1    5.13    0.71 
   5  -9   1    4.66    0.57 
   5   9  -1    5.20    0.67 
  -5  -9  -1    5.57    0.71 
  -5  -9  -1    4.25    0.65 
  -5  -9  -1    5.54    0.81 
   5  -9   1    4.74    0.74 
   5   9   1    6.17    0.70 
   5   9   1    7.41    0.82 
  -5   9  -1    7.25    0.74 
  -5   9  -1    6.02    0.68 
   5   9   1    6.78    0.82 
  -5  -9   1    8.15    0.77 
   5  -9  -1    7.10    0.82 
   5  -9  -1    6.61    0.55 
  -5   9  -1    8.43    0.86 
   5   9   1    6.05    0.75 
  -5  -9   1    6.00    0.45 
   5   9   1    6.35    0.77 
  -5  -9   1    6.62    0.73 
  -5  -9   1    8.94    1.00 
   5  -9  -1    6.08    0.79 
  -5  -9   1    5.96    0.75 
   5  -9  -1    7.56    0.69 
   5  -9  -1    6.33    0.82 
  -5  -9   1    7.34    0.82 
  -5   9  -1    8.38    0.88 
   5   9   1    6.42    0.50 
  -5  -9   1    6.75    0.78 
   5  -9  -1    7.71    0.82 
  -5   9  -1    7.47    0.76 
   5   9   1    6.51    0.73 
  -5   9  -1    8.43    0.94 
   5   9   1    6.07    0.59 
   6   9  -1    3.49    0.56 
   6  -9   1    2.73    0.58 
   6  -9   1    2.76    0.61 
  -6  -9  -1    2.27    0.54 
   6   9  -1    3.39    0.60 
  -6   9   1    2.61    0.51 
   6   9  -1    3.27    0.55 
   6   9  -1    2.73    0.51 
  -6   9   1    2.49    0.49 
  -6  -9  -1    3.51    0.61 
   6  -9   1    2.27    0.49 
   6   9  -1    2.73    0.46 
  -6  -9  -1    2.83    0.62 
  -6  -9  -1    2.38    0.48 
  -6   9   1    2.26    0.42 
  -6  -9  -1    1.90    0.38 
  -6   9   1    3.40    0.66 
   6  -9   1    3.08    0.48 
  -6   9   1    3.03    0.60 
  -6  -9  -1    3.00    0.56 
  -6  -9  -1    2.20    0.52 
   6   9  -1    3.22    0.58 
   6  -9   1    3.14    0.49 
   6  -9  -1    2.05    0.53 
  -6  -9   1    2.50    0.52 
  -6   9  -1    2.87    0.53 
  -6   9  -1    2.22    0.48 
  -6   9  -1    2.21    0.53 
   6  -9  -1    2.63    0.55 
   6  -9  -1    2.04    0.51 
  -6   9  -1    2.77    0.50 
  -6  -9   1    2.36    0.52 
  -6   9  -1    3.58    0.56 
   6   9   1    3.53    0.57 
  -6  -9   1    2.13    0.43 
  -6  -9   1    2.66    0.46 
   6  -9  -1    2.38    0.40 
   6  -9  -1    2.64    0.43 
   6   9   1    2.85    0.52 
   6   9   1    2.41    0.50 
  -6  -9   1    4.85    0.69 
   6   9   1    3.18    0.63 
   6   9   1    3.34    0.45 
   6   9   1    3.52    0.55 
   7  -9   1    0.62    0.36 
  -7   9   1    1.18    0.43 
   7  -9   1    1.33    0.46 
   7   9  -1    1.65    0.47 
  -7  -9  -1    2.04    0.53 
  -7  -9  -1    1.23    0.42 
  -7   9   1    1.18    0.46 
   7   9  -1    0.83    0.35 
   7  -9   1    1.38    0.37 
   7   9  -1    2.01    0.50 
   7  -9   1    1.51    0.40 
  -7  -9  -1    1.77    0.46 
   7   9  -1    1.21    0.38 
  -7  -9  -1    1.67    0.46 
  -7   9   1    1.69    0.48 
  -7  -9  -1    1.68    0.38 
   7   9  -1    1.61    0.38 
   7  -9   1    1.30    0.48 
   7   9  -1    0.91    0.42 
  -7   9   1    1.49    0.38 
  -7   9  -1    1.08    0.39 
   7  -9  -1    1.24    0.44 
   7   9   1    0.70    0.37 
  -7   9  -1    1.06    0.42 
   7  -9  -1    1.04    0.40 
  -7   9  -1    0.84    0.32 
  -7  -9   1    1.28    0.47 
   7   9   1    1.30    0.43 
   7  -9  -1    1.38    0.33 
   7   9   1    0.88    0.36 
  -7  -9   1    1.70    0.48 
  -7  -9   1    1.36    0.38 
   7   9   1    1.63    0.43 
  -7  -9   1    1.21    0.41 
  -7   9  -1    1.53    0.38 
  -7   9  -1    1.66    0.44 
  -7  -9   1    1.86    0.43 
   7   9   1    1.23    0.35 
   7  -9  -1    1.15    0.44 
   7  -9  -1    0.81    0.29 
   8   9  -1    6.95    0.79 
   8  -9   1    7.29    1.04 
  -8  -9  -1    5.68    0.80 
   8  -9   1    5.63    0.67 
  -8   9   1    7.03    0.92 
  -8   9   1    6.34    0.74 
   8   9  -1    7.95    0.97 
  -8  -9  -1    7.04    0.95 
  -8   9   1    5.85    0.91 
   8   9  -1    6.23    0.90 
   8  -9   1    6.03    0.74 
   8  -9   1    5.79    0.87 
   8   9  -1    6.74    0.87 
  -8  -9  -1    5.95    0.78 
  -8   9   1    5.60    0.84 
   8  -9   1    7.71    0.96 
   8   9   1    7.13    0.92 
  -8   9  -1    7.07    0.94 
   8  -9  -1    6.39    0.98 
   8  -9  -1    6.06    0.66 
  -8  -9   1    6.97    0.93 
   8  -9  -1    5.73    0.81 
  -8   9  -1    6.72    0.82 
  -8  -9   1    6.04    0.83 
   8  -9  -1    5.92    0.90 
  -8   9  -1    5.40    0.81 
   8   9   1    6.68    0.94 
   8  -9  -1    6.47    0.71 
   8   9   1    5.54    0.77 
  -8  -9   1    7.63    1.00 
  -8  -9   1    8.10    0.88 
  -8  -9   1    5.76    0.74 
   8   9   1    6.64    0.92 
  -8   9  -1    6.86    0.96 
   9  -9   1    2.62    0.53 
   9   9  -1    2.35    0.59 
   9  -9   1    1.84    0.43 
  -9   9   1    1.78    0.53 
   9   9  -1    2.67    0.63 
  -9  -9  -1    2.52    0.64 
   9  -9   1    2.43    0.64 
  -9   9   1    1.42    0.56 
  -9   9   1    1.90    0.47 
   9   9  -1    1.93    0.51 
  -9  -9  -1    1.18    0.43 
   9   9  -1    2.14    0.56 
   9  -9   1    1.81    0.53 
  -9   9   1    2.08    0.54 
   9  -9   1    3.10    0.74 
  -9  -9  -1    1.48    0.46 
  -9  -9   1    2.55    0.55 
   9  -9  -1    2.44    0.70 
  -9  -9   1    2.34    0.60 
   9   9   1    1.58    0.53 
  -9   9  -1    2.50    0.61 
   9  -9  -1    2.43    0.48 
   9  -9  -1    2.33    0.56 
  -9   9  -1    3.06    0.70 
   9   9   1    2.47    0.62 
  -9   9  -1    1.85    0.46 
   9   9   1    2.55    0.59 
  -9   9  -1    2.62    0.73 
   9  -9  -1    2.80    0.68 
   9   9   1    2.11    0.57 
  -9  -9   1    1.50    0.46 
   9  -9  -1    2.87    0.47 
  -9  -9   1    3.04    0.67 
  -9  -9   1    2.55    0.64 
  10  -9   1    3.55    0.85 
 -10  -9  -1    3.99    0.71 
  10   9  -1    4.47    0.82 
  10  -9   1    4.43    0.84 
  10  -9   1    4.02    0.62 
 -10   9   1    5.47    0.92 
 -10  -9  -1    5.10    0.82 
 -10   9   1    3.12    0.61 
  10  -9   1    4.09    0.69 
  10   9  -1    3.28    0.71 
  10   9  -1    3.73    0.77 
 -10   9   1    4.86    0.96 
 -10  -9  -1    4.14    0.79 
  10   9  -1    5.11    0.84 
  10  -9   1    3.85    0.75 
 -10   9  -1    5.01    0.90 
 -10  -9   1    4.46    0.86 
 -10  -9   1    4.74    0.84 
 -10   9  -1    3.87    0.89 
  10   9   1    3.90    0.80 
  10  -9  -1    3.98    0.94 
  10   9   1    4.48    0.79 
  10   9   1    4.33    0.80 
  10  -9  -1    5.72    0.94 
  10   9   1    4.19    0.81 
  10  -9  -1    3.73    0.75 
  10  -9  -1    3.59    0.55 
  10  -9  -1    3.95    0.63 
 -10   9  -1    3.60    0.67 
  11  -9   1   15.29    1.56 
  11  -9   1   14.39    1.28 
 -11   9   1   13.40    1.08 
  11  -9   1   14.49    1.66 
 -11   9   1   14.74    1.65 
 -11  -9  -1   12.85    1.38 
 -11   9   1   15.25    1.59 
  11  -9   1   11.61    1.34 
 -11  -9  -1   14.26    1.43 
  11   9  -1   13.03    1.46 
  11   9  -1   12.71    1.35 
  11  -9   1   13.15    0.98 
 -11  -9  -1   14.54    1.51 
  11   9  -1   14.25    1.36 
  11   9  -1   13.89    1.52 
  11  -9  -1   15.21    1.55 
  11  -9  -1   12.27    0.88 
  11  -9  -1   13.17    1.41 
 -11   9  -1   12.15    1.25 
  11   9   1   11.93    1.33 
  11  -9  -1   10.68    1.48 
 -11  -9   1   12.65    1.40 
  11  -9  -1   12.06    1.13 
  11   9   1   10.83    1.35 
 -11   9  -1   14.88    1.72 
 -11   9  -1   11.84    1.36 
  11   9   1   14.41    1.40 
  11   9   1   11.50    1.38 
 -11  -9   1   15.26    1.54 
  12  -9   1    2.42    0.80 
  12   9  -1    2.24    0.66 
 -12  -9  -1    1.39    0.58 
 -12   9   1    1.72    0.66 
 -12   9   1    2.96    0.68 
  12   9  -1    1.59    0.59 
 -12   9   1    2.36    0.74 
  12   9  -1    2.59    0.73 
  12  -9   1    3.75    0.63 
  12  -9   1    1.89    0.51 
  12  -9   1    1.93    0.60 
  12   9  -1    1.80    0.63 
  12   9   1    2.31    0.67 
 -12  -9   1    1.72    0.61 
  12  -9  -1    2.98    0.49 
 -12  -9   1    2.43    0.74 
  12   9   1    1.74    0.58 
 -12   9  -1    2.64    0.67 
 -12   9  -1    1.65    0.71 
  12   9   1    2.23    0.72 
  12   9   1    2.02    0.72 
  12  -9  -1    2.74    0.61 
  12  -9  -1    2.26    0.72 
  12  -9  -1    2.95    0.72 
 -12   9  -1    2.77    0.74 
 -13  -9  -1   13.27    1.53 
  13   9  -1   11.35    1.42 
 -13   9   1   11.46    1.68 
  13   9  -1   13.40    1.45 
  13   9   1   10.71    1.38 
 -13  -9   1   12.57    1.50 
   0  10   1    2.12    0.46 
   0  10   1    2.08    0.28 
   0  10   1    1.74    0.46 
   0  10  -1    2.21    0.51 
   0 -10   1    1.60    0.40 
   0  10  -1    2.18    0.46 
   0 -10   1    1.99    0.42 
   0  10   1    2.18    0.42 
   0 -10   1    1.57    0.36 
   0 -10  -1    2.03    0.43 
   0  10  -1    2.03    0.42 
   0 -10  -1    1.76    0.34 
   0 -10  -1    2.39    0.40 
   0  10   1    1.88    0.40 
   0  10  -1    1.60    0.36 
   0 -10   1    2.16    0.43 
   0 -10   1    1.99    0.39 
   0 -10  -1    1.84    0.40 
   0 -10   1    1.79    0.34 
   0 -10  -1    1.68    0.39 
   0 -10  -1    1.74    0.38 
   0  10  -1    2.13    0.34 
   0  10  -1    2.36    0.47 
   1  10  -1    2.33    0.28 
  -1  10   1    2.29    0.41 
  -1  10   1    2.27    0.50 
  -1 -10  -1    1.53    0.37 
   1  10  -1    2.67    0.45 
   1  10  -1    1.75    0.42 
  -1 -10  -1    1.89    0.41 
   1 -10   1    1.96    0.43 
   1  10  -1    2.14    0.30 
  -1 -10  -1    1.93    0.40 
  -1  10   1    2.03    0.48 
   1 -10   1    2.70    0.44 
   1 -10   1    2.91    0.45 
   1 -10   1    2.24    0.45 
   1  10  -1    1.85    0.39 
  -1  10   1    1.68    0.28 
   1  10  -1    2.95    0.51 
  -1 -10  -1    2.89    0.48 
  -1 -10  -1    1.93    0.41 
   1 -10   1    2.37    0.38 
  -1 -10  -1    2.59    0.43 
   1  10  -1    1.93    0.45 
   1 -10   1    2.45    0.44 
  -1 -10   1    2.13    0.43 
   1  10   1    1.75    0.24 
   1 -10  -1    1.68    0.35 
   1  10   1    1.53    0.35 
   1  10   1    2.16    0.25 
  -1  10  -1    2.33    0.48 
  -1 -10   1    2.28    0.42 
   1  10   1    2.16    0.38 
   1 -10  -1    1.99    0.35 
  -1  10  -1    2.10    0.35 
   1  10   1    1.84    0.39 
  -1 -10   1    2.03    0.41 
   1 -10  -1    2.18    0.40 
   1  10   1    2.07    0.46 
  -1  10  -1    2.46    0.46 
   1  10   1    1.59    0.41 
  -1 -10   1    1.43    0.37 
  -1  10  -1    1.67    0.44 
  -1 -10   1    2.41    0.44 
   1 -10  -1    1.93    0.43 
   1 -10  -1    1.63    0.40 
   1 -10  -1    1.57    0.36 
  -1  10  -1    1.74    0.38 
  -1 -10   1    1.85    0.35 
   2 -10   1   14.30    0.95 
   2  10  -1   15.00    0.93 
   2  10  -1   13.66    0.98 
  -2 -10  -1   13.25    0.88 
   2  10  -1   13.91    0.88 
   2 -10   1   15.04    1.00 
   2  10  -1   14.19    0.68 
  -2 -10  -1   16.06    0.92 
  -2  10   1   14.52    1.01 
   2  10  -1   13.35    0.89 
   2 -10   1   16.65    0.90 
   2  10  -1   14.48    0.72 
  -2 -10  -1   14.35    0.88 
   2 -10   1   13.30    0.87 
   2 -10   1   14.33    0.87 
  -2 -10  -1   14.15    0.95 
   2  10  -1   15.23    0.95 
  -2  10   1   13.82    0.72 
  -2 -10  -1   13.51    0.85 
  -2 -10  -1   14.94    0.92 
  -2  10   1   14.81    1.00 
  -2  10   1   14.01    0.87 
   2 -10   1   12.96    0.71 
  -2 -10   1   13.74    0.88 
   2 -10  -1   12.46    0.89 
   2  10   1   14.51    1.01 
   2  10   1   14.61    0.91 
  -2  10  -1   15.08    0.99 
   2 -10  -1   14.83    0.90 
  -2 -10   1   13.13    0.86 
   2  10   1   13.21    0.60 
  -2 -10   1   13.30    0.88 
   2 -10  -1   14.44    0.83 
   2 -10  -1   14.32    0.86 
  -2  10  -1   13.47    0.89 
  -2  10  -1   14.90    1.00 
   2  10   1   14.96    0.89 
   2  10   1   14.37    0.89 
   2 -10  -1   14.03    0.74 
  -2 -10   1   13.86    0.93 
  -2 -10   1   13.72    0.94 
  -2  10  -1   14.60    0.79 
   2  10   1   14.52    0.72 
  -2 -10   1   14.13    0.85 
   2 -10  -1   14.14    0.97 
  -2 -10   1   14.38    0.84 
   2  10   1   13.17    0.92 
   3  10  -1    2.02    0.43 
   3  10  -1    1.74    0.29 
  -3 -10  -1    1.19    0.33 
   3 -10   1    0.75    0.32 
   3 -10   1    1.13    0.38 
   3 -10   1    1.26    0.23 
  -3 -10  -1    1.38    0.38 
  -3  10   1    1.24    0.40 
   3 -10   1    1.08    0.30 
  -3 -10  -1    0.57    0.28 
  -3  10   1    1.04    0.33 
   3  10  -1    1.04    0.36 
   3  10  -1    1.50    0.39 
  -3  10   1    2.35    0.37 
   3  10  -1    1.18    0.36 
   3 -10   1    1.16    0.33 
  -3  10   1    1.55    0.43 
   3 -10   1    1.44    0.35 
   3  10  -1    1.50    0.40 
  -3 -10  -1    1.19    0.35 
   3  10  -1    0.88    0.25 
  -3 -10  -1    0.74    0.25 
  -3 -10  -1    1.44    0.41 
  -3  10   1    1.56    0.39 
   3  10   1    0.93    0.20 
  -3 -10   1    0.74    0.29 
   3  10   1    0.91    0.32 
   3 -10  -1    1.32    0.34 
   3  10   1    1.50    0.42 
   3  10   1    0.55    0.28 
  -3  10  -1    0.88    0.34 
  -3  10  -1    1.12    0.33 
   3 -10  -1    1.11    0.23 
  -3  10  -1    0.99    0.36 
  -3  10  -1    0.84    0.34 
   3 -10  -1    0.77    0.33 
  -3 -10   1    1.27    0.36 
  -3 -10   1    0.91    0.34 
  -3 -10   1    1.47    0.36 
  -3  10  -1    1.18    0.30 
  -3 -10   1    1.32    0.31 
  -3 -10   1    1.03    0.32 
  -3 -10   1    1.84    0.46 
   3 -10  -1    1.45    0.34 
   3 -10  -1    1.08    0.29 
   3  10   1    0.51    0.32 
   3 -10  -1    0.86    0.36 
   3  10   1    0.94    0.26 
   4 -10   1   52.80    2.42 
  -4  10   1   55.41    2.21 
   4  10  -1   56.25    2.34 
  -4 -10  -1   57.59    2.13 
  -4  10   1   57.97    2.13 
  -4  10   1   56.09    2.39 
   4  10  -1   57.58    2.03 
   4  10  -1   51.82    2.29 
  -4 -10  -1   60.21    2.32 
   4 -10   1   58.82    2.30 
  -4 -10  -1   59.19    2.28 
   4 -10   1   55.71    2.42 
  -4  10   1   58.64    2.44 
  -4 -10  -1   58.11    2.31 
  -4 -10  -1   55.41    2.34 
  -4  10   1   56.24    2.38 
   4 -10   1   57.22    2.22 
   4 -10   1   54.70    2.17 
   4  10  -1   55.46    2.39 
  -4 -10  -1   56.72    2.41 
   4  10  -1   59.80    2.18 
   4  10  -1   57.90    2.33 
   4  10  -1   56.96    2.27 
   4 -10   1   55.08    2.17 
   4  10   1   61.33    2.32 
   4  10   1   61.63    2.41 
  -4 -10   1   56.28    2.28 
  -4  10  -1   55.72    2.15 
   4 -10  -1   57.77    2.47 
   4  10   1   59.92    2.35 
  -4 -10   1   59.18    2.34 
  -4  10  -1   55.59    2.26 
  -4 -10   1   58.06    2.09 
  -4 -10   1   61.72    2.25 
  -4  10  -1   55.44    2.36 
   4  10   1   61.33    2.21 
  -4 -10   1   59.59    2.45 
   4 -10  -1   58.85    2.17 
   4  10   1   55.45    2.36 
   4  10   1   57.57    2.42 
   4 -10  -1   56.95    2.14 
  -4 -10   1   60.72    2.40 
   4  10   1   58.34    2.00 
  -4  10  -1   62.60    2.44 
   4 -10  -1   57.59    2.29 
  -4 -10   1   52.76    2.32 
  -4  10  -1   57.64    2.42 
   4 -10  -1   57.47    2.43 
  -5 -10  -1    4.48    0.68 
   5 -10   1    4.69    0.70 
   5  10  -1    4.78    0.55 
   5 -10   1    6.09    0.76 
  -5  10   1    4.46    0.71 
  -5 -10  -1    4.11    0.70 
  -5  10   1    5.31    0.67 
   5 -10   1    5.57    0.81 
  -5 -10  -1    4.98    0.68 
  -5  10   1    4.35    0.59 
  -5  10   1    4.95    0.73 
  -5 -10  -1    5.28    0.74 
   5  10  -1    4.43    0.67 
   5  10  -1    5.51    0.72 
  -5  10   1    4.89    0.69 
   5  10  -1    5.98    0.79 
  -5 -10  -1    4.89    0.65 
   5 -10   1    3.92    0.69 
  -5 -10  -1    5.81    0.59 
   5  10  -1    3.80    0.61 
   5  10  -1    5.44    0.65 
   5 -10   1    4.70    0.61 
   5 -10   1    4.66    0.60 
  -5 -10   1    5.82    0.85 
   5  10   1    5.49    0.79 
   5 -10  -1    6.54    0.87 
   5 -10  -1    4.60    0.65 
  -5 -10   1    4.03    0.61 
   5 -10  -1    5.51    0.76 
  -5  10  -1    6.28    0.75 
   5  10   1    5.09    0.64 
  -5 -10   1    4.84    0.69 
  -5  10  -1    5.45    0.68 
  -5 -10   1    5.57    0.77 
  -5 -10   1    5.08    0.74 
   5  10   1    5.44    0.74 
   5 -10  -1    4.23    0.66 
   5  10   1    4.98    0.69 
  -5  10  -1    5.49    0.74 
   5  10   1    4.74    0.70 
   5 -10  -1    5.12    0.59 
   5  10   1    6.08    0.62 
  -5  10  -1    6.59    0.75 
  -5 -10   1    6.41    0.71 
   5 -10  -1    5.69    0.62 
  -5  10  -1    6.15    0.85 
  -6 -10  -1   52.91    2.24 
   6  10  -1   51.77    2.26 
  -6  10   1   54.26    2.40 
   6  10  -1   54.02    2.33 
  -6  10   1   52.12    2.46 
   6  10  -1   50.99    2.36 
  -6  10   1   53.81    2.28 
   6  10  -1   53.67    2.26 
   6 -10   1   53.12    2.48 
  -6  10   1   55.69    2.23 
  -6 -10  -1   52.22    2.37 
   6 -10   1   54.78    2.16 
  -6 -10  -1   53.89    2.31 
   6  10  -1   52.84    2.07 
  -6  10   1   51.76    2.17 
   6  10  -1   52.26    2.33 
  -6  10   1   51.17    2.16 
   6 -10   1   51.56    2.15 
   6 -10   1   50.22    2.32 
  -6 -10  -1   54.02    2.47 
   6 -10   1   50.70    2.44 
   6 -10  -1   57.28    2.53 
   6 -10  -1   56.02    2.36 
   6  10   1   55.28    2.28 
  -6  10  -1   54.49    2.24 
  -6  10  -1   57.91    2.29 
  -6 -10   1   56.92    2.22 
  -6 -10   1   57.31    2.39 
   6 -10  -1   52.92    2.44 
  -6  10  -1   56.53    2.32 
  -6 -10   1   57.79    2.46 
  -6 -10   1   58.05    2.41 
  -6  10  -1   55.55    2.50 
   6  10   1   55.94    2.37 
   6  10   1   54.61    2.40 
   6 -10  -1   53.19    2.36 
   6 -10  -1   54.26    2.09 
  -6  10  -1   55.53    2.40 
   6 -10  -1   55.34    2.12 
   6  10   1   56.77    2.31 
  -6 -10   1   57.87    2.14 
   6  10   1   56.62    2.36 
  -6  10  -1   54.06    2.25 
  -7 -10  -1    4.28    0.74 
  -7 -10  -1    3.99    0.68 
   7 -10   1    3.98    0.78 
  -7  10   1    4.01    0.59 
   7 -10   1    4.54    0.61 
   7 -10   1    4.41    0.79 
   7  10  -1    4.03    0.65 
   7  10  -1    3.48    0.67 
  -7  10   1    4.73    0.67 
   7  10  -1    4.52    0.62 
  -7  10   1    3.22    0.59 
  -7  10   1    3.65    0.73 
   7 -10   1    3.66    0.57 
  -7  10   1    4.42    0.73 
   7  10  -1    4.99    0.80 
   7  10  -1    3.80    0.66 
  -7 -10  -1    4.38    0.69 
   7 -10   1    5.97    0.83 
  -7  10  -1    5.68    0.72 
   7  10   1    5.65    0.89 
   7  10   1    3.57    0.64 
  -7 -10   1    5.19    0.71 
   7 -10  -1    4.55    0.76 
  -7  10  -1    5.04    0.80 
  -7 -10   1    5.27    0.82 
  -7  10  -1    4.76    0.72 
   7  10   1    4.19    0.72 
   7 -10  -1    3.32    0.51 
   7  10   1    3.94    0.70 
  -7  10  -1    4.06    0.62 
  -7 -10   1    4.05    0.72 
  -7  10  -1    4.22    0.77 
   7 -10  -1    4.25    0.57 
   7 -10  -1    4.84    0.76 
   7 -10  -1    3.83    0.75 
   8 -10   1   58.74    2.47 
  -8 -10  -1   58.83    2.72 
   8  10  -1   59.92    2.76 
   8  10  -1   60.95    2.70 
   8 -10   1   57.65    2.77 
   8  10  -1   66.23    2.67 
  -8  10   1   61.95    2.51 
  -8 -10  -1   60.54    2.59 
   8  10  -1   67.44    2.74 
  -8  10   1   55.44    2.66 
  -8  10   1   63.09    2.92 
   8 -10   1   57.82    2.40 
   8 -10   1   62.23    2.91 
   8 -10   1   60.51    2.70 
  -8 -10  -1   61.22    2.64 
  -8  10   1   61.50    2.63 
   8 -10  -1   59.45    2.87 
   8  10   1   62.69    2.80 
   8  10   1   69.04    2.78 
  -8  10  -1   60.62    2.55 
   8 -10  -1   62.02    2.81 
  -8 -10   1   63.80    2.80 
  -8  10  -1   62.51    2.75 
   8 -10  -1   60.90    2.34 
   8  10   1   62.42    2.66 
  -8  10  -1   60.08    2.87 
  -8 -10   1   67.36    2.78 
   8  10   1   65.08    2.76 
   8 -10  -1   60.70    2.41 
  -8  10  -1   66.09    2.70 
   8 -10  -1   64.58    2.76 
  -8 -10   1   61.34    2.53 
   9 -10   1    0.27    0.27 
  -9 -10  -1    1.11    0.49 
  -9  10   1    0.24    0.43 
   9  10  -1    0.45    0.33 
   9 -10   1    0.11    0.34 
  -9 -10  -1   -0.13    0.34 
  -9  10   1    0.52    0.41 
   9 -10   1    0.51    0.34 
   9  10  -1    0.15    0.36 
  -9  10   1    0.69    0.36 
   9 -10   1    0.41    0.33 
  -9 -10  -1    0.34    0.33 
   9  10  -1    0.41    0.36 
   9  10  -1   -0.01    0.26 
   9 -10   1    0.54    0.44 
  -9  10   1    0.17    0.32 
   9 -10  -1    1.35    0.59 
   9 -10  -1    0.30    0.41 
   9 -10  -1    0.72    0.32 
   9  10   1    0.75    0.41 
  -9  10  -1    0.94    0.45 
  -9  10  -1    1.34    0.58 
   9 -10  -1    0.75    0.29 
  -9  10  -1    1.04    0.49 
   9  10   1    1.06    0.40 
   9  10   1    0.45    0.42 
   9 -10  -1    0.38    0.35 
  -9  10  -1    0.69    0.38 
  -9 -10   1    0.37    0.39 
  -9 -10   1    1.02    0.47 
  10 -10   1   13.49    1.07 
 -10 -10  -1   15.33    1.18 
  10 -10   1   14.21    1.43 
  10  10  -1   15.57    1.42 
  10  10  -1   14.13    1.41 
  10 -10   1   12.98    0.97 
  10 -10   1   15.29    1.54 
 -10 -10  -1   14.95    1.21 
  10 -10   1   17.39    1.86 
 -10 -10  -1   15.24    1.54 
 -10  10   1   16.99    1.60 
 -10  10   1   14.60    1.66 
 -10  10   1   14.64    1.10 
 -10  10   1   14.49    1.54 
  10  10  -1   14.13    1.52 
  10  10  -1   17.31    1.61 
  10 -10  -1   12.51    0.99 
  10 -10  -1   14.16    0.92 
 -10  10  -1   13.68    1.63 
 -10  10  -1   11.74    1.19 
 -10 -10   1   10.81    1.27 
 -10 -10   1   14.67    1.51 
  10  10   1   16.25    1.59 
  10 -10  -1   15.75    1.75 
 -10  10  -1   13.04    1.34 
  10  10   1   13.11    1.39 
  10 -10  -1   13.36    1.43 
  10  10   1   14.01    1.56 
 -10  10  -1   16.29    1.56 
  10 -10  -1   15.16    1.53 
 -11  10   1    2.99    0.65 
  11  10  -1    3.10    0.73 
  11 -10   1    2.53    0.63 
  11 -10   1    2.20    0.51 
  11  10  -1    2.23    0.60 
 -11 -10  -1    2.69    0.70 
  11  10  -1    3.02    0.79 
 -11  10   1    1.40    0.62 
  11 -10   1    2.66    0.73 
  11 -10   1    2.41    0.79 
  11 -10   1    1.01    0.50 
 -11  10   1    2.12    0.60 
 -11  10   1    1.89    0.76 
  11  10  -1    1.58    0.55 
 -11  10  -1    3.69    0.81 
  11  10   1    3.09    0.72 
  11 -10  -1    2.31    0.55 
  11 -10  -1    2.93    0.83 
 -11 -10   1    3.42    0.81 
  11 -10  -1    2.72    0.75 
  11  10   1    1.71    0.61 
  11 -10  -1    2.61    0.48 
 -11  10  -1    3.65    0.82 
 -11  10  -1    2.64    0.60 
  11 -10  -1    1.85    0.60 
 -11 -10   1    2.62    0.69 
 -11  10  -1    1.96    0.73 
  11  10   1    3.17    0.73 
 -12  10   1   10.84    1.41 
 -12  10   1   10.57    1.19 
  12 -10   1   11.84    1.23 
  12 -10   1   10.99    1.52 
  12 -10   1    9.75    1.00 
  12  10  -1    9.63    1.30 
  12  10  -1   10.60    1.25 
 -12  10   1   12.16    1.58 
  12  10  -1    9.99    1.32 
  12  10  -1    8.50    1.27 
 -12  10   1   11.68    1.47 
 -12 -10  -1   10.58    1.34 
  12 -10   1   10.58    1.36 
  12  10   1   12.16    1.46 
  12 -10  -1    8.57    1.24 
 -12  10  -1   10.36    1.36 
 -12 -10   1   12.45    1.48 
  12 -10  -1   10.83    1.07 
 -12  10  -1    9.89    1.20 
  12 -10  -1   10.50    0.80 
 -12  10  -1   10.38    1.35 
  12  10   1    8.86    1.28 
  12 -10  -1    9.69    1.42 
 -12  10  -1   11.19    1.50 
  12  10   1   12.52    1.56 
   0  11   1   27.89    1.33 
   0 -11   1   27.11    1.29 
   0 -11  -1   23.00    1.29 
   0  11   1   25.04    1.45 
   0  11  -1   26.22    1.39 
   0 -11   1   26.24    1.24 
   0  11   1   25.10    1.38 
   0 -11   1   27.74    1.40 
   0 -11   1   24.11    1.33 
   0 -11  -1   25.28    1.23 
   0  11  -1   26.33    1.33 
   0 -11  -1   24.41    1.30 
   0  11  -1   25.33    1.09 
   0 -11  -1   30.00    1.42 
   0  11  -1   25.53    1.45 
   0 -11   1   26.31    1.25 
   0 -11  -1   23.94    1.22 
   0 -11   1   25.88    1.35 
   0 -11  -1   25.79    1.29 
   1 -11   1   30.95    1.54 
   1 -11   1   28.43    1.35 
   1 -11   1   29.44    1.48 
   1  11  -1   27.25    1.45 
  -1  11   1   29.91    1.40 
  -1 -11  -1   29.02    1.43 
   1  11  -1   28.72    1.43 
  -1 -11  -1   28.02    1.37 
  -1  11   1   27.94    1.56 
  -1 -11  -1   28.93    1.37 
  -1  11   1   30.33    1.18 
  -1 -11  -1   29.39    1.39 
   1  11  -1   28.08    1.46 
   1 -11   1   28.51    1.41 
  -1 -11  -1   26.55    1.42 
  -1 -11  -1   27.29    1.38 
   1 -11   1   30.21    1.30 
  -1  11   1   27.91    1.50 
   1  11  -1   29.97    1.59 
   1  11  -1   29.14    1.14 
   1 -11   1   28.93    1.36 
  -1  11  -1   28.59    1.54 
  -1 -11   1   30.17    1.35 
   1  11   1   28.88    1.49 
  -1 -11   1   29.18    1.38 
  -1 -11   1   27.57    1.42 
  -1  11  -1   28.29    1.24 
   1 -11  -1   28.35    1.40 
  -1  11  -1   30.42    1.53 
   1  11   1   28.51    1.40 
  -1  11  -1   27.26    1.40 
  -1 -11   1   26.82    1.37 
  -1 -11   1   30.00    1.50 
   1 -11  -1   31.06    1.36 
   1 -11  -1   28.46    1.28 
  -1 -11   1   28.59    1.39 
   1 -11  -1   26.33    1.35 
   1  11   1   28.20    1.57 
   1 -11  -1   30.24    1.53 
   1 -11  -1   29.21    1.44 
   2  11  -1   77.02    2.47 
  -2 -11  -1   80.68    2.81 
   2  11  -1   73.67    2.87 
   2 -11   1   76.99    2.99 
   2  11  -1   77.11    2.86 
   2 -11   1   79.29    2.83 
  -2 -11  -1   77.95    2.80 
  -2 -11  -1   80.52    2.88 
  -2  11   1   81.90    2.57 
  -2 -11  -1   77.67    2.82 
   2 -11   1   76.02    2.76 
  -2  11   1   75.50    2.99 
  -2 -11  -1   78.47    2.94 
   2  11  -1   77.72    2.51 
   2  11  -1   77.44    2.85 
   2 -11   1   78.82    2.76 
  -2 -11  -1   78.97    2.81 
  -2  11   1   77.21    2.98 
   2  11  -1   73.59    2.99 
   2 -11   1   74.79    2.56 
   2 -11   1   75.29    2.91 
  -2  11   1   75.43    2.78 
  -2 -11   1   72.78    2.81 
   2 -11  -1   69.58    2.91 
   2 -11  -1   77.02    2.91 
  -2 -11   1   75.48    2.93 
  -2  11  -1   72.85    2.92 
   2  11   1   73.18    2.89 
  -2  11  -1   73.17    2.96 
   2  11   1   72.89    2.82 
  -2 -11   1   75.69    2.87 
   2 -11  -1   75.46    2.80 
   2  11   1   73.81    2.48 
  -2 -11   1   72.61    2.73 
   2 -11  -1   72.79    2.75 
   2 -11  -1   73.15    2.57 
   2  11   1   70.52    2.96 
   2 -11  -1   76.85    2.70 
  -2  11  -1   75.24    2.61 
  -2 -11   1   74.21    2.71 
  -2  11  -1   71.25    2.79 
  -2 -11   1   74.52    2.78 
  -3 -11  -1    8.12    0.88 
  -3  11   1    8.40    0.91 
   3  11  -1    8.28    0.94 
   3 -11   1    9.33    0.76 
   3  11  -1    9.91    0.98 
   3  11  -1    8.92    0.62 
  -3  11   1    7.74    0.59 
   3  11  -1    8.47    0.55 
  -3 -11  -1    7.10    0.86 
   3 -11   1    8.79    0.69 
  -3 -11  -1    7.99    0.83 
  -3 -11  -1    9.68    0.79 
   3  11  -1    8.47    0.88 
  -3 -11  -1    9.30    0.70 
   3  11  -1    9.76    0.81 
  -3  11   1    8.39    0.96 
   3 -11   1   10.67    1.08 
  -3 -11  -1    9.68    0.91 
   3  11  -1    8.08    0.97 
   3 -11   1    8.84    0.86 
   3 -11   1    9.00    0.99 
  -3  11   1    8.66    0.89 
  -3  11   1    9.40    1.02 
  -3  11  -1    9.23    0.98 
  -3 -11   1    9.60    0.92 
   3 -11  -1    9.86    0.75 
  -3 -11   1   10.01    0.72 
   3  11   1    9.86    0.82 
   3 -11  -1   12.28    0.93 
  -3 -11   1    9.43    1.02 
   3  11   1   11.08    1.08 
  -3  11  -1    9.98    0.79 
  -3 -11   1   10.41    0.71 
  -3  11  -1    9.97    1.01 
   3  11   1   10.42    0.65 
   3  11   1    9.81    1.03 
   3 -11  -1    9.81    0.76 
  -3 -11   1   10.57    0.86 
   3 -11  -1    9.16    0.68 
  -3  11  -1   10.11    0.68 
  -3 -11   1   10.64    0.83 
  -3  11  -1   11.26    0.87 
   3 -11  -1   10.49    1.05 
  -4  11   1   22.40    1.23 
  -4 -11  -1   21.76    1.36 
   4 -11   1   20.94    1.35 
  -4  11   1   22.75    1.36 
  -4 -11  -1   21.64    1.13 
   4 -11   1   21.29    1.23 
  -4 -11  -1   24.10    1.27 
   4  11  -1   21.92    1.13 
   4  11  -1   23.64    1.35 
  -4  11   1   24.19    1.40 
  -4 -11  -1   22.91    1.29 
   4  11  -1   23.23    1.31 
  -4  11   1   22.65    1.37 
  -4  11   1   21.26    1.09 
   4 -11   1   22.50    1.19 
   4  11  -1   23.16    1.40 
  -4 -11  -1   21.78    1.31 
  -4 -11  -1   22.80    1.27 
   4  11  -1   23.21    1.28 
   4 -11   1   22.19    1.21 
   4  11  -1   22.29    1.32 
   4 -11   1   24.09    1.44 
   4  11   1   21.66    1.14 
  -4 -11   1   21.12    1.35 
  -4 -11   1   21.57    1.09 
   4 -11  -1   21.85    1.14 
   4 -11  -1   23.17    1.27 
   4 -11  -1   20.81    1.36 
  -4  11  -1   21.16    1.31 
  -4  11  -1   22.92    1.35 
  -4  11  -1   22.43    1.15 
   4  11   1   21.23    1.29 
   4 -11  -1   23.77    1.20 
  -4 -11   1   21.96    1.31 
   4  11   1   24.70    1.37 
  -4  11  -1   20.79    1.23 
   4  11   1   22.53    1.33 
   4 -11  -1   22.07    1.35 
  -4 -11   1   22.54    1.34 
   4  11   1   23.07    1.41 
  -4 -11   1   24.48    1.33 
  -4  11  -1   23.41    1.38 
  -4 -11   1   24.88    1.24 
  -5 -11  -1    0.53    0.36 
   5  11  -1    1.79    0.51 
   5 -11   1    1.66    0.50 
  -5 -11  -1    1.42    0.43 
   5  11  -1    1.68    0.46 
  -5  11   1    1.30    0.39 
   5  11  -1    1.74    0.40 
   5  11  -1    2.23    0.51 
  -5  11   1    1.26    0.43 
   5 -11   1    1.04    0.37 
   5 -11   1    1.28    0.45 
  -5 -11  -1    1.20    0.42 
  -5  11   1    1.23    0.45 
   5  11  -1    1.93    0.47 
  -5 -11  -1    1.75    0.43 
   5 -11   1    1.95    0.44 
  -5  11   1    1.67    0.48 
  -5 -11  -1    1.58    0.50 
  -5  11   1    1.07    0.37 
   5 -11   1    2.28    0.49 
  -5  11  -1    2.79    0.54 
  -5  11  -1    1.71    0.48 
   5  11   1    1.68    0.41 
  -5 -11   1    2.45    0.55 
   5 -11  -1    2.46    0.61 
   5 -11  -1    2.34    0.44 
   5  11   1    1.50    0.42 
  -5 -11   1    1.70    0.57 
   5 -11  -1    1.96    0.53 
   5  11   1    2.16    0.51 
   5 -11  -1    2.39    0.49 
  -5  11  -1    1.98    0.50 
   5  11   1    2.35    0.58 
  -5 -11   1    2.02    0.44 
   5 -11  -1    2.20    0.44 
  -5 -11   1    1.70    0.49 
  -5  11  -1    2.29    0.51 
  -5  11  -1    2.35    0.47 
   5 -11  -1    1.91    0.42 
   6 -11   1    4.42    0.63 
   6 -11   1    5.19    0.67 
  -6 -11  -1    3.08    0.62 
  -6  11   1    3.65    0.61 
   6 -11   1    4.64    0.79 
  -6 -11  -1    3.24    0.70 
  -6 -11  -1    4.41    0.68 
   6 -11   1    4.54    0.73 
  -6  11   1    4.51    0.71 
   6  11  -1    4.86    0.79 
  -6  11   1    4.06    0.74 
   6  11  -1    3.97    0.63 
   6 -11   1    3.19    0.70 
   6  11  -1    5.24    0.81 
  -6 -11  -1    5.16    0.78 
   6  11  -1    4.06    0.68 
  -6  11   1    4.12    0.75 
  -6  11   1    3.61    0.61 
   6  11  -1    4.57    0.69 
  -6  11  -1    5.30    0.71 
  -6 -11   1    5.05    0.79 
   6 -11  -1    4.86    0.61 
   6  11   1    4.38    0.72 
   6 -11  -1    4.22    0.76 
   6 -11  -1    5.02    0.61 
   6 -11  -1    3.83    0.65 
  -6 -11   1    4.68    0.66 
  -6  11  -1    4.62    0.73 
  -6  11  -1    5.16    0.82 
  -6  11  -1    4.85    0.81 
   6 -11  -1    6.20    0.88 
  -6 -11   1    4.03    0.70 
   6  11   1    3.95    0.71 
   6  11   1    6.22    0.77 
   6  11   1    6.48    0.89 
   6 -11  -1    6.33    0.89 
  -6  11  -1    3.97    0.62 
   7 -11   1    2.35    0.60 
   7  11  -1    1.06    0.41 
   7 -11   1    1.54    0.44 
  -7  11   1    1.55    0.45 
  -7 -11  -1    1.35    0.46 
   7 -11   1    1.22    0.52 
   7 -11   1    0.74    0.39 
  -7  11   1    1.52    0.47 
   7  11  -1    1.83    0.50 
  -7  11   1    2.39    0.61 
   7  11  -1    1.34    0.44 
   7  11  -1    1.48    0.48 
   7 -11   1    1.43    0.41 
  -7  11   1    1.69    0.47 
  -7 -11  -1    1.47    0.46 
  -7  11   1    1.27    0.51 
  -7  11   1    2.21    0.60 
  -7 -11  -1    2.04    0.56 
   7  11  -1    1.32    0.43 
   7  11   1    1.44    0.45 
  -7  11  -1    1.98    0.50 
  -7 -11   1    1.89    0.46 
  -7  11  -1    1.34    0.44 
   7 -11  -1    1.48    0.40 
  -7 -11   1    2.01    0.54 
   7 -11  -1    2.06    0.57 
   7  11   1    2.66    0.63 
  -7  11  -1    0.88    0.43 
   7 -11  -1    1.92    0.54 
  -7 -11   1    1.73    0.55 
   7  11   1    1.53    0.49 
   7 -11  -1    1.58    0.54 
   7  11   1    2.68    0.61 
   7 -11  -1    1.24    0.37 
  -7  11  -1    2.37    0.62 
  -7  11  -1    1.22    0.45 
   8 -11   1    1.52    0.42 
   8  11  -1    1.51    0.49 
  -8  11   1    1.13    0.42 
  -8 -11  -1    2.15    0.52 
   8 -11   1    2.08    0.61 
   8 -11   1    2.09    0.60 
  -8  11   1    2.58    0.62 
   8  11  -1    1.27    0.47 
  -8 -11  -1    2.40    0.61 
  -8  11   1    2.13    0.53 
   8  11  -1    1.51    0.50 
   8  11  -1    1.83    0.55 
   8 -11   1    1.70    0.64 
   8 -11   1    2.20    0.51 
  -8  11   1    1.19    0.53 
  -8  11   1    1.52    0.45 
  -8 -11  -1    0.68    0.40 
  -8  11  -1    1.62    0.54 
  -8  11  -1    2.17    0.64 
  -8  11  -1    1.60    0.50 
   8 -11  -1    2.14    0.57 
   8  11   1    1.64    0.51 
   8  11   1    2.13    0.55 
  -8  11  -1    2.18    0.54 
  -8 -11   1    1.31    0.53 
  -8  11  -1    1.49    0.49 
  -8 -11   1    1.26    0.54 
   8  11   1    1.95    0.57 
   8 -11  -1    1.60    0.59 
   8 -11  -1    1.96    0.47 
   8 -11  -1    1.75    0.40 
   8 -11  -1    1.91    0.62 
  -9 -11  -1    6.27    0.94 
  -9 -11  -1    8.78    1.07 
   9  11  -1    6.21    0.91 
  -9  11   1    5.03    0.93 
   9 -11   1    6.09    0.83 
   9  11  -1    6.88    1.01 
   9  11  -1    6.52    1.00 
   9 -11   1    5.87    1.06 
   9 -11   1    5.44    0.90 
  -9  11   1    7.14    1.17 
   9 -11   1    6.45    1.01 
  -9  11   1    6.35    0.88 
  -9 -11  -1    5.71    0.94 
   9 -11   1    6.66    0.81 
  -9  11   1    6.93    0.96 
  -9  11  -1    5.09    0.85 
  -9  11  -1    6.35    1.00 
  -9 -11   1    6.67    1.03 
   9 -11  -1    7.30    0.78 
   9 -11  -1    6.54    1.02 
   9  11   1    6.05    0.94 
  -9 -11   1    7.60    1.08 
  -9  11  -1    5.97    1.06 
  -9  11  -1    6.96    0.95 
   9 -11  -1    6.25    1.13 
   9 -11  -1    7.87    1.10 
   9  11   1    6.80    0.96 
   9  11   1    5.39    0.95 
   9 -11  -1    6.33    0.80 
 -10  11   1    3.56    0.76 
  10 -11   1    3.92    0.86 
  10 -11   1    5.08    0.92 
  10 -11   1    4.02    0.65 
  10  11  -1    3.03    0.71 
  10 -11   1    3.37    0.66 
  10  11  -1    3.51    0.75 
  10  11  -1    4.22    0.84 
 -10  11   1    3.59    0.92 
 -10  11   1    5.41    0.83 
 -10 -11  -1    3.26    0.73 
  10 -11   1    4.76    1.01 
 -10  11   1    3.19    0.77 
 -10 -11   1    3.85    0.80 
 -10  11  -1    4.55    0.82 
 -10  11  -1    3.10    0.73 
  10 -11  -1    3.12    0.71 
 -10  11  -1    2.58    0.71 
  10  11   1    3.34    0.78 
  10 -11  -1    2.74    0.58 
  10  11   1    3.75    0.80 
  10 -11  -1    4.19    0.97 
  10 -11  -1    4.23    0.59 
 -10  11  -1    2.84    0.85 
  10 -11  -1    4.05    0.88 
 -10 -11   1    5.28    0.96 
  10  11   1    4.03    0.85 
 -11  11   1    0.03    0.43 
  11  11  -1    0.81    0.55 
  11 -11   1    0.24    0.53 
  11 -11   1    0.11    0.35 
 -11  11   1    1.40    0.53 
 -11  11   1    1.23    0.48 
 -11  11   1    0.08    0.45 
  11  11  -1    0.49    0.42 
  11 -11   1    0.89    0.50 
  11 -11   1    0.89    0.37 
  11  11  -1   -0.05    0.27 
 -11 -11  -1    0.23    0.44 
  11 -11   1    0.80    0.39 
  11 -11  -1    0.12    0.53 
 -11  11  -1    0.14    0.36 
  11 -11  -1    0.90    0.31 
 -11 -11   1    0.51    0.44 
  11  11   1    0.39    0.36 
  11  11   1    0.48    0.42 
 -11 -11   1    0.48    0.48 
 -11  11  -1    0.61    0.60 
 -11  11  -1    0.70    0.49 
  11 -11  -1    0.63    0.37 
 -11  11  -1    0.47    0.42 
  11 -11  -1    0.79    0.50 
  11 -11  -1    0.27    0.38 
 -12  11   1    3.68    0.85 
  12 -11   1    2.88    0.95 
  12 -11   1    2.63    0.79 
  12  11  -1    3.98    0.84 
  12 -11   1    2.65    0.68 
  12 -11   1    2.94    0.75 
 -12 -11  -1    2.02    0.69 
  12  11  -1    2.70    0.78 
 -12  11   1    4.44    0.89 
 -12  11  -1    3.16    0.73 
 -12  11  -1    3.36    0.81 
 -12 -11   1    3.94    0.88 
  12  11   1    2.73    0.72 
  12 -11  -1    3.60    0.97 
 -12  11  -1    3.21    0.80 
   0 -12  -1    1.19    0.35 
   0 -12   1    1.18    0.40 
   0 -12   1    0.40    0.30 
   0  12  -1    1.10    0.36 
   0  12  -1    1.18    0.41 
   0 -12  -1    0.96    0.33 
   0 -12   1    1.23    0.35 
   0  12   1    0.51    0.32 
   0 -12   1    1.01    0.33 
   0 -12   1    1.15    0.39 
   0 -12   1    1.08    0.33 
   0 -12  -1    0.95    0.36 
   0  12   1    0.81    0.31 
   0 -12  -1    1.27    0.39 
   0 -12  -1    1.41    0.37 
   0 -12  -1    1.00    0.37 
   0  12   1    1.40    0.45 
   0  12  -1    0.99    0.40 
  -1 -12  -1    1.47    0.42 
   1 -12   1    3.44    0.55 
  -1 -12  -1    2.22    0.52 
  -1  12   1    1.92    0.53 
  -1  12   1    2.35    0.56 
  -1 -12  -1    2.22    0.46 
  -1 -12  -1    2.97    0.55 
   1  12  -1    1.96    0.52 
   1  12  -1    2.38    0.53 
  -1  12   1    2.17    0.46 
   1 -12   1    2.09    0.49 
   1 -12   1    3.68    0.64 
   1 -12   1    2.63    0.46 
  -1 -12  -1    2.55    0.46 
  -1 -12  -1    1.91    0.42 
   1 -12   1    2.18    0.48 
   1  12  -1    2.67    0.56 
   1 -12   1    2.21    0.43 
  -1  12  -1    2.61    0.50 
  -1 -12   1    2.02    0.44 
   1  12   1    2.28    0.47 
  -1 -12   1    2.47    0.54 
   1 -12  -1    2.75    0.48 
  -1  12  -1    2.23    0.54 
  -1  12  -1    2.74    0.59 
   1 -12  -1    2.18    0.46 
   1  12   1    2.00    0.49 
  -1 -12   1    2.49    0.47 
  -1 -12   1    2.15    0.49 
   1 -12  -1    3.13    0.51 
  -1  12  -1    2.35    0.40 
   1 -12  -1    2.27    0.50 
   1 -12  -1    2.84    0.45 
   1 -12  -1    2.40    0.54 
  -1 -12   1    2.36    0.46 
  -1 -12   1    3.19    0.55 
   1  12   1    2.16    0.54 
  -2  12   1    1.52    0.50 
   2 -12   1    2.32    0.54 
  -2 -12  -1    1.58    0.43 
   2 -12   1    1.65    0.47 
  -2 -12  -1    1.81    0.45 
   2  12  -1    1.28    0.45 
   2 -12   1    1.54    0.41 
   2 -12   1    1.69    0.35 
  -2 -12  -1    2.11    0.47 
   2  12  -1    1.72    0.46 
  -2 -12  -1    2.31    0.54 
   2  12  -1    1.22    0.42 
  -2  12   1    1.36    0.38 
   2 -12   1    1.86    0.40 
  -2 -12  -1    2.51    0.50 
  -2  12   1    2.37    0.56 
  -2 -12  -1    1.30    0.41 
   2 -12   1    1.87    0.41 
  -2 -12   1    1.05    0.37 
   2 -12  -1    1.38    0.39 
   2 -12  -1    2.01    0.44 
  -2 -12   1    2.03    0.44 
   2 -12  -1    1.53    0.36 
   2 -12  -1    2.26    0.39 
   2 -12  -1    1.83    0.50 
  -2 -12   1    1.25    0.37 
  -2  12  -1    1.83    0.36 
  -2  12  -1    2.03    0.49 
  -2  12  -1    1.57    0.49 
  -2 -12   1    2.09    0.47 
  -2 -12   1    1.90    0.52 
   2  12   1    1.58    0.41 
   2 -12  -1    1.86    0.47 
   2  12   1    2.77    0.56 
  -2  12  -1    1.62    0.48 
   2  12   1    1.66    0.50 
  -2 -12   1    1.89    0.42 
  -3  12   1   60.00    2.62 
   3 -12   1   61.89    2.43 
  -3  12   1   57.82    2.18 
  -3  12   1   57.59    2.40 
   3  12  -1   63.94    2.56 
  -3 -12  -1   59.04    2.45 
   3  12  -1   57.23    2.61 
   3 -12   1   59.43    2.57 
  -3 -12  -1   60.99    2.45 
  -3 -12  -1   61.32    2.52 
  -3 -12  -1   59.90    2.39 
  -3  12   1   56.82    2.57 
   3 -12   1   59.27    2.34 
   3 -12   1   60.60    2.65 
   3  12  -1   59.29    2.52 
  -3 -12  -1   59.10    2.56 
  -3 -12  -1   58.37    2.34 
  -3  12   1   59.15    2.55 
   3 -12   1   61.90    2.43 
  -3  12  -1   59.86    2.57 
   3  12   1   63.40    2.70 
   3 -12  -1   60.42    2.64 
   3 -12  -1   60.56    2.31 
  -3 -12   1   58.89    2.50 
   3  12   1   58.13    2.53 
   3 -12  -1   58.55    2.42 
  -3 -12   1   62.70    2.37 
  -3  12  -1   61.07    2.56 
   3  12   1   63.16    2.55 
   3 -12  -1   58.96    2.55 
  -3 -12   1   59.15    2.33 
   3 -12  -1   57.26    2.34 
  -3  12  -1   60.04    2.46 
  -3  12  -1   57.50    2.58 
  -3 -12   1   59.36    2.58 
  -3  12  -1   60.08    2.26 
  -3 -12   1   65.30    2.51 
  -3 -12   1   61.45    2.55 
  -4 -12  -1    6.02    0.78 
  -4  12   1    5.90    0.87 
  -4 -12  -1    5.48    0.86 
   4 -12   1    5.78    0.74 
   4 -12   1    6.88    0.82 
   4 -12   1    5.75    0.69 
  -4  12   1    6.89    0.90 
   4  12  -1    6.27    0.66 
  -4  12   1    6.02    0.68 
  -4 -12  -1    5.77    0.78 
   4  12  -1    6.91    0.88 
   4  12  -1    7.06    0.92 
  -4  12   1    5.15    0.79 
  -4  12   1    6.19    0.78 
   4 -12   1    6.76    0.93 
   4 -12   1    7.70    1.02 
  -4 -12  -1    5.98    0.81 
  -4 -12  -1    4.96    0.68 
  -4 -12  -1    5.51    0.68 
   4  12   1    5.75    0.80 
   4 -12  -1    5.65    0.69 
  -4  12  -1    5.90    0.82 
  -4 -12   1    6.87    0.88 
  -4 -12   1    5.76    0.66 
   4 -12  -1    5.70    0.86 
  -4 -12   1    5.94    0.72 
  -4  12  -1    6.95    0.86 
  -4 -12   1    6.81    0.90 
   4  12   1    5.69    0.82 
  -4  12  -1    5.21    0.78 
   4 -12  -1    5.96    0.68 
  -4  12  -1    6.18    0.70 
   4  12   1    6.88    0.70 
  -4  12  -1    5.64    0.82 
   4  12   1    6.54    0.93 
   4 -12  -1    6.70    0.93 
   4 -12  -1    6.37    0.79 
  -4 -12   1    7.58    0.89 
  -4 -12   1    6.39    0.89 
   5 -12   1   24.26    1.59 
  -5 -12  -1   26.57    1.50 
  -5 -12  -1   26.94    1.59 
  -5  12   1   23.59    1.53 
  -5  12   1   26.42    1.44 
  -5  12   1   26.54    1.56 
   5 -12   1   25.74    1.61 
   5  12  -1   26.09    1.35 
  -5 -12  -1   25.95    1.44 
   5  12  -1   26.70    1.55 
  -5 -12  -1   27.42    1.65 
   5 -12   1   25.64    1.38 
   5 -12   1   25.65    1.45 
  -5 -12  -1   27.36    1.51 
  -5  12   1   28.92    1.37 
   5 -12   1   24.20    1.36 
  -5  12   1   26.11    1.61 
   5 -12   1   26.10    1.40 
   5  12  -1   25.32    1.57 
   5 -12  -1   26.67    1.62 
   5 -12  -1   27.50    1.51 
  -5 -12   1   26.80    1.59 
   5 -12  -1   26.17    1.34 
   5  12   1   25.40    1.34 
  -5  12  -1   27.96    1.60 
   5  12   1   24.79    1.53 
   5  12   1   25.92    1.56 
  -5  12  -1   28.49    1.64 
  -5  12  -1   26.63    1.38 
  -5  12  -1   28.85    1.61 
   5 -12  -1   26.03    1.34 
  -5 -12   1   26.59    1.64 
  -5 -12   1   29.53    1.44 
   5 -12  -1   27.77    1.67 
  -5  12  -1   28.26    1.52 
   5 -12  -1   26.41    1.35 
  -5 -12   1   28.67    1.59 
  -6  12   1    1.75    0.47 
  -6 -12  -1    2.56    0.60 
   6  12  -1    1.41    0.49 
  -6  12   1    1.87    0.48 
   6  12  -1    0.79    0.40 
  -6 -12  -1    1.34    0.43 
   6  12  -1    2.31    0.62 
   6 -12   1    0.98    0.44 
   6 -12   1    2.06    0.58 
   6 -12   1    1.79    0.46 
  -6 -12  -1    1.04    0.43 
   6  12  -1    1.60    0.43 
  -6  12   1    1.48    0.40 
   6 -12   1    1.70    0.45 
  -6  12   1    1.32    0.49 
  -6  12   1    1.85    0.56 
  -6 -12   1    1.75    0.52 
  -6  12  -1    2.07    0.51 
   6 -12  -1    1.89    0.44 
   6 -12  -1    1.68    0.42 
  -6  12  -1    1.90    0.57 
   6  12   1    2.70    0.53 
  -6  12  -1    1.46    0.42 
   6  12   1    1.95    0.56 
   6 -12  -1    2.00    0.57 
  -6  12  -1    2.05    0.57 
   6 -12  -1    1.87    0.58 
  -6 -12   1    2.19    0.57 
  -6 -12   1    1.69    0.45 
   6  12   1    1.49    0.49 
  -6  12  -1    1.32    0.44 
   6 -12  -1    1.53    0.47 
  -7  12   1   50.58    2.23 
   7 -12   1   49.08    2.52 
   7  12  -1   48.46    2.23 
   7 -12   1   47.21    2.37 
   7 -12   1   49.35    2.55 
  -7  12   1   51.49    2.26 
   7  12  -1   51.45    2.39 
  -7  12   1   49.73    2.45 
   7 -12   1   46.91    2.14 
   7  12  -1   48.58    2.38 
  -7  12   1   51.37    2.58 
  -7 -12  -1   48.76    2.43 
  -7 -12  -1   52.85    2.38 
  -7 -12  -1   53.17    2.30 
   7  12  -1   49.51    2.43 
   7 -12   1   44.99    2.08 
  -7  12  -1   49.60    2.28 
   7 -12  -1   50.79    2.44 
  -7  12  -1   49.70    2.53 
  -7 -12   1   50.68    2.41 
   7 -12  -1   50.48    2.13 
   7 -12  -1   49.57    2.50 
  -7 -12   1   47.05    2.39 
   7 -12  -1   50.82    2.07 
   7  12   1   45.56    2.37 
   7 -12  -1   50.50    2.55 
   7  12   1   53.62    2.41 
  -7  12  -1   49.82    2.43 
   7  12   1   51.82    2.28 
  -7  12  -1   51.16    2.25 
  -8  12   1    1.25    0.45 
  -8  12   1    1.29    0.50 
   8 -12   1    0.49    0.31 
   8 -12   1    0.48    0.37 
  -8  12   1    1.71    0.56 
   8 -12   1    1.57    0.60 
   8 -12   1    0.89    0.44 
   8  12  -1    1.37    0.52 
  -8  12   1    1.28    0.47 
  -8  12   1    1.11    0.57 
   8  12  -1    0.68    0.43 
  -8 -12  -1    1.34    0.49 
   8  12  -1    1.20    0.43 
   8 -12   1    1.24    0.60 
  -8 -12  -1    1.26    0.44 
  -8 -12  -1    0.99    0.49 
   8 -12  -1    0.74    0.52 
  -8 -12   1    0.25    0.38 
  -8 -12   1    1.67    0.53 
   8 -12  -1    1.10    0.40 
   8  12   1    1.33    0.52 
  -8  12  -1    1.81    0.56 
  -8  12  -1    0.97    0.41 
  -8  12  -1    1.04    0.51 
  -8  12  -1    0.95    0.45 
   8 -12  -1    1.01    0.34 
   8  12   1    1.25    0.45 
   8 -12  -1    0.50    0.37 
   8 -12  -1    0.89    0.47 
  -8  12  -1    0.85    0.42 
  -9  12   1   15.41    1.20 
  -9  12   1   15.25    1.70 
   9  12  -1   13.84    1.38 
  -9  12   1   14.36    1.58 
  -9 -12  -1   15.99    1.58 
  -9  12   1   14.76    1.42 
  -9  12   1   14.03    1.16 
   9 -12   1   17.94    1.91 
   9 -12   1   14.91    1.06 
   9  12  -1   13.77    1.51 
   9  12  -1   17.52    1.39 
   9 -12   1   16.52    1.65 
   9 -12   1   16.67    1.19 
   9 -12   1   15.07    1.54 
   9  12   1   15.60    1.62 
   9 -12  -1   15.58    1.63 
   9 -12  -1   16.07    1.79 
  -9  12  -1   15.26    1.59 
   9  12   1   14.72    1.22 
  -9  12  -1   16.67    1.28 
  -9  12  -1   15.13    1.67 
   9 -12  -1   15.72    1.61 
   9 -12  -1   16.43    1.11 
   9 -12  -1   15.99    1.02 
  -9  12  -1   17.87    1.32 
  -9 -12   1   19.60    1.44 
  -9  12  -1   17.68    1.30 
  -9 -12   1   18.84    1.38 
 -10  12   1    0.86    0.47 
 -10 -12  -1    1.05    0.45 
  10 -12   1    0.76    0.40 
  10 -12   1    1.12    0.53 
 -10  12   1    0.85    0.51 
  10  12  -1    0.08    0.30 
  10 -12   1    0.62    0.53 
 -10  12   1    1.25    0.64 
  10 -12   1    0.97    0.37 
  10  12  -1    1.12    0.48 
 -10  12   1    0.34    0.41 
  10  12  -1    0.31    0.50 
 -10  12   1    1.26    0.55 
  10 -12   1    0.78    0.50 
  10  12   1    0.80    0.46 
 -10  12  -1    0.48    0.43 
 -10 -12   1    0.96    0.52 
 -10  12  -1    0.35    0.50 
  10  12   1    0.87    0.46 
  10 -12  -1    1.07    0.42 
  10 -12  -1    1.15    0.52 
 -10 -12   1    0.37    0.38 
 -10  12  -1    0.61    0.47 
  10 -12  -1    0.64    0.66 
 -10  12  -1    0.87    0.47 
  10 -12  -1    0.98    0.36 
  10 -12  -1    0.59    0.43 
 -10  12  -1    0.97    0.48 
  11 -12   1    6.64    1.12 
  11 -12   1    5.57    1.09 
  11 -12   1    5.92    0.79 
 -11  12   1    5.76    1.07 
  11  12  -1    6.08    1.06 
 -11 -12  -1    6.27    1.09 
 -11  12   1    5.62    0.95 
  11 -12   1    6.59    0.92 
 -11  12   1    6.99    1.19 
 -11  12   1    6.23    1.03 
  11 -12   1    6.21    1.07 
  11  12  -1    5.27    0.98 
  11  12  -1    5.73    1.01 
  11 -12  -1    7.92    0.93 
  11  12   1    6.97    1.14 
  11 -12  -1    6.74    1.10 
 -11 -12   1    6.53    1.09 
 -11  12  -1    7.96    1.17 
  11 -12  -1    5.30    1.11 
  11  12   1    6.45    1.05 
 -11  12  -1    4.57    1.02 
  11 -12  -1    6.05    0.73 
  11 -12  -1    5.85    1.05 
 -11  12  -1    6.08    1.00 
 -11  12  -1    6.96    1.17 
   0 -13  -1   73.36    2.95 
   0 -13  -1   71.10    2.75 
   0  13   1   72.69    2.86 
   0 -13   1   75.95    2.84 
   0 -13   1   73.04    2.76 
   0 -13   1   75.11    2.97 
   0  13  -1   76.66    3.16 
   0  13  -1   75.76    3.01 
   0 -13  -1   73.72    2.93 
   0  13  -1   75.97    2.91 
   0 -13   1   75.69    2.80 
   0 -13  -1   74.60    2.80 
   0  13   1   70.21    2.98 
   0 -13   1   73.58    2.94 
   0  13   1   72.13    3.11 
   0 -13   1   74.72    2.96 
   0 -13  -1   73.02    2.89 
   0 -13  -1   74.53    2.84 
   1 -13   1   49.12    2.23 
  -1 -13  -1   49.74    2.17 
   1 -13   1   55.32    2.16 
  -1  13   1   55.56    2.49 
   1 -13   1   50.23    2.22 
   1 -13   1   50.66    2.01 
  -1  13   1   49.20    2.30 
   1 -13   1   52.95    2.33 
   1  13  -1   54.85    2.25 
  -1  13   1   49.69    2.16 
  -1 -13  -1   48.66    2.11 
  -1 -13  -1   49.10    2.12 
   1 -13   1   51.05    2.12 
  -1 -13  -1   53.21    2.15 
  -1 -13  -1   53.47    2.31 
  -1 -13  -1   51.07    2.21 
   1  13  -1   47.51    2.23 
   1  13  -1   50.97    2.43 
  -1 -13   1   46.78    2.10 
  -1 -13   1   51.19    2.15 
   1 -13  -1   49.59    2.27 
  -1 -13   1   47.68    2.20 
   1 -13  -1   47.95    2.19 
   1 -13  -1   50.68    2.08 
   1  13   1   47.47    2.37 
   1  13   1   48.12    2.25 
   1 -13  -1   49.47    2.13 
   1 -13  -1   48.85    2.17 
  -1  13  -1   49.99    2.29 
   1  13   1   50.25    2.19 
  -1 -13   1   44.08    2.11 
   1 -13  -1   46.78    1.98 
  -1  13  -1   53.01    2.44 
  -1 -13   1   49.58    2.26 
  -1 -13   1   49.65    2.08 
  -1  13  -1   52.26    2.22 
  -2 -13  -1   39.96    1.89 
   2 -13   1   41.36    1.89 
  -2 -13  -1   41.94    1.95 
  -2  13   1   42.37    2.11 
   2  13  -1   43.13    2.19 
   2  13  -1   42.30    2.03 
   2 -13   1   43.59    1.92 
  -2 -13  -1   40.97    1.90 
   2 -13   1   40.95    1.95 
  -2 -13  -1   44.87    2.01 
   2 -13   1   42.22    2.06 
   2  13  -1   46.46    2.06 
  -2  13   1   41.49    2.14 
  -2 -13  -1   41.44    2.05 
  -2 -13  -1   45.46    1.99 
   2 -13   1   43.57    2.12 
  -2  13   1   44.85    1.98 
   2 -13  -1   43.84    1.88 
   2  13   1   39.78    2.13 
  -2 -13   1   42.39    1.94 
  -2  13  -1   44.85    2.14 
  -2 -13   1   47.44    1.99 
  -2  13  -1   44.59    2.19 
  -2 -13   1   40.11    1.93 
   2 -13  -1   42.14    1.94 
   2 -13  -1   41.62    2.10 
   2  13   1   45.18    2.05 
  -2 -13   1   43.50    1.87 
  -2  13  -1   43.60    2.00 
  -2  13  -1   43.85    2.04 
  -2 -13   1   43.32    2.02 
  -2 -13   1   43.87    2.10 
   2 -13  -1   40.31    1.91 
   2 -13  -1   44.67    2.09 
   2  13   1   42.22    2.06 
  -3 -13  -1   52.53    2.24 
  -3 -13  -1   52.62    2.28 
  -3  13   1   51.09    2.46 
   3 -13   1   53.09    2.48 
   3 -13   1   54.45    2.25 
  -3 -13  -1   53.71    2.21 
   3 -13   1   51.54    2.41 
   3 -13   1   53.76    2.28 
  -3 -13  -1   52.48    2.34 
   3  13  -1   56.51    2.56 
  -3  13   1   47.55    2.38 
  -3  13   1   51.72    2.25 
  -3 -13  -1   54.05    2.44 
  -3 -13  -1   55.20    2.31 
   3  13  -1   54.44    2.39 
   3 -13   1   53.59    2.19 
  -3  13   1   52.55    2.40 
  -3  13  -1   54.15    2.51 
  -3 -13   1   55.54    2.32 
   3 -13  -1   53.12    2.22 
  -3 -13   1   51.87    2.17 
  -3 -13   1   52.53    2.33 
   3  13   1   51.72    2.50 
  -3  13  -1   52.95    2.31 
  -3 -13   1   54.40    2.20 
  -3 -13   1   51.97    2.34 
   3 -13  -1   54.65    2.43 
   3  13   1   44.95    2.28 
  -3 -13   1   57.23    2.50 
  -3  13  -1   52.47    2.43 
   3 -13  -1   48.42    2.40 
   3  13   1   52.99    2.37 
   3 -13  -1   51.73    2.26 
   3 -13  -1   51.17    2.14 
  -3  13  -1   52.61    2.39 
  -4 -13  -1   10.49    1.04 
  -4  13   1   10.16    1.17 
  -4 -13  -1    9.95    1.08 
  -4 -13  -1    9.59    1.02 
   4 -13   1    9.43    0.95 
   4  13  -1   13.69    1.36 
   4 -13   1    8.92    1.12 
  -4  13   1   11.16    1.23 
   4 -13   1    9.89    1.17 
   4 -13   1    9.83    1.01 
   4 -13   1   11.38    0.91 
   4  13  -1    9.41    1.10 
  -4 -13  -1   12.08    1.21 
  -4  13   1    9.59    1.01 
  -4 -13  -1    9.50    0.76 
  -4  13   1    9.55    1.13 
  -4 -13  -1   12.90    1.36 
  -4 -13   1    9.78    1.02 
  -4  13  -1    9.72    1.02 
   4  13   1   12.06    1.29 
   4  13   1    8.98    1.08 
  -4 -13   1   12.69    1.25 
  -4  13  -1   11.28    1.25 
   4 -13  -1   11.79    1.28 
  -4 -13   1   11.80    1.28 
  -4  13  -1   10.98    1.17 
  -4  13  -1   10.40    0.81 
   4 -13  -1    9.70    1.13 
  -4  13  -1   11.21    1.19 
   4 -13  -1   10.61    0.85 
  -4 -13   1   10.14    0.98 
   4 -13  -1   10.91    1.10 
   4 -13  -1   10.01    0.80 
  -4 -13   1   12.76    1.22 
   5 -13   1   18.77    1.18 
   5 -13   1   19.37    1.19 
   5  13  -1   20.55    1.41 
  -5  13   1   17.58    1.33 
  -5 -13  -1   20.32    1.42 
   5  13  -1   21.09    1.38 
   5 -13   1   19.37    1.43 
  -5  13   1   19.78    1.42 
   5 -13   1   18.11    1.40 
   5 -13   1   18.82    1.21 
  -5 -13  -1   18.58    1.32 
  -5  13   1   20.04    1.37 
   5 -13   1   19.35    1.27 
  -5  13   1   18.67    1.24 
  -5 -13  -1   21.04    1.33 
  -5 -13  -1   21.29    1.28 
   5  13   1   20.11    1.38 
   5  13   1   20.30    1.43 
  -5  13  -1   20.07    1.16 
   5 -13  -1   18.47    1.15 
   5 -13  -1   17.84    1.25 
  -5 -13   1   19.74    1.19 
  -5  13  -1   18.65    1.35 
  -5 -13   1   21.83    1.38 
   5 -13  -1   20.06    1.18 
   5 -13  -1   18.21    1.38 
  -5 -13   1   18.78    1.34 
   5 -13  -1   19.29    1.41 
  -5  13  -1   20.69    1.33 
  -5  13  -1   19.10    1.37 
   5 -13  -1   18.76    1.15 
  -5  13  -1   18.64    1.34 
  -6  13   1    5.44    0.86 
   6  13  -1    4.31    0.76 
  -6 -13  -1    4.56    0.73 
  -6 -13  -1    4.95    0.82 
   6 -13   1    4.82    0.71 
   6 -13   1    4.26    0.87 
   6  13  -1    3.58    0.61 
   6 -13   1    4.53    0.85 
  -6  13   1    5.27    0.81 
   6  13  -1    4.38    0.79 
  -6  13   1    4.84    0.86 
  -6  13   1    3.51    0.74 
  -6 -13  -1    5.24    0.86 
   6 -13   1    4.78    0.72 
   6  13   1    4.98    0.71 
  -6 -13   1    4.75    0.84 
   6  13   1    4.93    0.84 
   6 -13  -1    4.31    0.72 
  -6 -13   1    4.44    0.77 
   6 -13  -1    3.59    0.60 
   6 -13  -1    4.80    0.91 
   6  13   1    2.90    0.66 
   6 -13  -1    3.88    0.62 
  -6  13  -1    3.71    0.77 
  -6  13  -1    3.57    0.75 
  -6  13  -1    4.80    0.74 
  -6  13  -1    4.28    0.74 
   6 -13  -1    4.34    0.80 
  -6  13  -1    4.31    0.78 
   7 -13   1    1.00    0.41 
   7 -13   1    0.56    0.49 
   7 -13   1    1.27    0.54 
  -7  13   1    1.18    0.46 
  -7 -13  -1    0.53    0.34 
  -7  13   1    0.51    0.40 
  -7  13   1    1.32    0.45 
   7  13  -1    0.63    0.39 
   7  13  -1    0.57    0.33 
   7 -13   1    0.84    0.39 
  -7 -13  -1    0.43    0.35 
   7  13  -1    0.29    0.33 
  -7  13   1    0.95    0.44 
  -7 -13  -1    0.00    0.30 
   7 -13  -1    0.28    0.29 
   7 -13  -1    0.55    0.40 
   7  13   1    0.62    0.40 
   7  13   1    0.22    0.31 
  -7 -13   1    0.78    0.44 
   7  13   1    0.67    0.44 
  -7  13  -1    0.40    0.35 
   7 -13  -1   -0.25    0.34 
  -7  13  -1    0.19    0.40 
   7 -13  -1    0.73    0.33 
  -7 -13   1    0.12    0.38 
  -7  13  -1    1.01    0.44 
  -7  13  -1    0.49    0.40 
   8 -13   1    0.66    0.46 
  -8 -13  -1    0.87    0.49 
  -8  13   1    0.43    0.40 
   8 -13   1    0.69    0.36 
  -8  13   1    0.48    0.51 
   8  13  -1    0.65    0.44 
  -8 -13  -1    0.43    0.41 
   8 -13   1    0.37    0.40 
  -8  13   1    0.40    0.48 
   8 -13   1    0.62    0.54 
  -8  13   1    0.43    0.37 
   8 -13   1    0.12    0.33 
   8  13  -1   -0.11    0.28 
  -8  13  -1    0.39    0.49 
  -8 -13   1    1.30    0.55 
   8  13   1    0.93    0.48 
  -8  13  -1    1.09    0.44 
  -8  13  -1    0.32    0.43 
   8  13   1    0.40    0.36 
   8 -13  -1    0.63    0.47 
   8 -13  -1    0.65    0.47 
  -8  13  -1    0.75    0.44 
   8 -13  -1    0.38    0.35 
   8 -13  -1    0.51    0.31 
   8 -13  -1    0.64    0.57 
  -8 -13   1    0.95    0.45 
  -9  13   1    2.17    0.80 
   9 -13   1    2.12    0.64 
   9 -13   1    1.78    0.47 
   9  13  -1    1.16    0.49 
  -9  13   1    1.56    0.53 
   9 -13   1    1.30    0.60 
   9 -13   1    1.30    0.49 
  -9  13   1    1.81    0.57 
  -9 -13  -1    1.46    0.58 
   9  13  -1    1.47    0.55 
  -9  13   1    0.71    0.48 
   9 -13   1    1.63    0.63 
  -9 -13   1    1.13    0.45 
   9 -13  -1    1.10    0.62 
  -9  13  -1    0.57    0.43 
   9  13   1    1.48    0.55 
  -9 -13   1    1.48    0.60 
  -9  13  -1    1.09    0.61 
   9  13   1    1.60    0.57 
   9 -13  -1    1.61    0.43 
  -9  13  -1    2.07    0.61 
   9 -13  -1    2.02    0.71 
  -9  13  -1    1.53    0.57 
   9 -13  -1    0.87    0.51 
   9 -13  -1    1.11    0.42 
  10 -13   1    7.65    0.99 
 -10  13   1    6.43    0.95 
  10  13  -1    6.33    1.05 
  10 -13   1    7.37    1.16 
 -10  13   1    6.77    1.02 
  10 -13   1    6.88    1.16 
  10 -13   1    9.12    1.48 
 -10 -13  -1    8.50    1.25 
 -10  13   1    7.15    1.21 
  10 -13   1    7.25    0.88 
 -10  13   1    6.40    0.99 
  10  13  -1    7.90    1.09 
 -10  13   1    6.15    1.08 
 -10 -13   1    7.21    1.15 
  10  13   1    7.19    1.16 
  10 -13  -1    6.78    1.11 
  10 -13  -1    6.07    1.15 
 -10  13  -1    5.82    0.95 
 -10  13  -1    7.62    1.22 
 -10  13  -1    5.95    1.00 
 -10  13  -1    6.96    1.24 
  10 -13  -1    7.75    0.84 
  10  13   1    7.49    1.08 
  10 -13  -1    6.91    0.89 
  10 -13  -1    8.09    1.23 
 -10  13  -1    6.69    0.99 
 -11  13   1    1.92    0.67 
  11  13  -1    1.75    0.54 
  11 -13   1    2.16    0.73 
  11 -13   1    0.67    0.52 
 -11 -13  -1    1.48    0.67 
 -11  13  -1    1.74    0.63 
  11 -13  -1    2.17    0.61 
  11  13   1    0.67    0.45 
 -11 -13   1    2.03    0.75 
   0 -14   1    5.25    0.82 
   0 -14  -1    5.61    0.80 
   0  14   1    7.37    0.92 
   0 -14  -1    5.02    0.78 
   0  14  -1    6.70    0.87 
   0 -14   1    6.48    0.78 
   0 -14   1    5.35    0.72 
   0 -14  -1    5.53    0.74 
   0 -14  -1    7.01    0.83 
   0  14   1    4.34    0.83 
   0 -14   1    5.93    0.87 
   0 -14   1    4.74    0.76 
   0  14  -1    5.47    0.82 
   0  14   1    5.05    0.81 
   0 -14  -1    6.18    0.85 
   0 -14   1    5.32    0.72 
   0 -14  -1    6.87    0.83 
   0  14  -1    5.71    0.92 
   1 -14   1    0.42    0.37 
   1 -14   1    0.64    0.30 
  -1 -14  -1    0.35    0.30 
   1 -14   1    0.36    0.33 
  -1 -14  -1    0.85    0.37 
   1  14  -1    0.56    0.37 
   1 -14   1    0.25    0.28 
  -1  14   1    0.35    0.37 
  -1  14   1    0.53    0.32 
   1 -14   1    0.74    0.35 
   1  14  -1    0.51    0.38 
   1 -14   1    0.81    0.31 
  -1 -14  -1    0.26    0.27 
  -1 -14  -1    0.58    0.37 
   1  14  -1    0.86    0.46 
  -1 -14  -1    0.71    0.35 
  -1  14   1    0.64    0.36 
  -1 -14  -1    0.73    0.39 
  -1 -14   1    0.69    0.31 
  -1  14  -1    0.54    0.34 
   1 -14  -1    0.33    0.32 
   1  14   1    0.41    0.39 
   1  14   1    0.81    0.39 
  -1 -14   1    0.42    0.40 
  -1 -14   1    0.43    0.32 
   1 -14  -1    0.33    0.34 
  -1  14  -1    1.02    0.45 
   1 -14  -1    0.56    0.28 
  -1  14  -1    0.53    0.37 
  -1 -14   1    1.41    0.44 
  -1 -14   1    0.56    0.31 
  -1 -14   1    0.67    0.37 
   1 -14  -1    0.26    0.28 
   1 -14  -1    0.63    0.32 
   1 -14  -1    0.58    0.37 
   1  14   1    0.24    0.33 
   2 -14   1   14.57    1.10 
   2 -14   1   13.92    1.01 
   2 -14   1   15.45    1.06 
   2 -14   1   15.95    1.18 
   2  14  -1   13.27    1.31 
  -2  14   1   14.77    1.08 
  -2 -14  -1   14.94    1.04 
  -2  14   1   15.09    1.51 
   2  14  -1   14.42    1.12 
   2  14  -1   12.64    1.37 
  -2 -14  -1   15.66    1.19 
  -2 -14  -1   15.84    1.12 
  -2 -14  -1   15.43    1.09 
  -2 -14  -1   16.56    1.11 
  -2 -14  -1   15.18    1.08 
  -2  14   1   14.78    1.45 
  -2 -14   1   14.58    1.00 
   2  14   1   16.03    1.16 
   2 -14  -1   15.37    1.03 
  -2 -14   1   16.54    1.14 
  -2 -14   1   15.85    1.15 
   2 -14  -1   16.47    1.11 
   2  14   1   16.18    1.53 
  -2 -14   1   15.79    1.21 
  -2  14  -1   16.32    1.22 
  -2 -14   1   14.76    1.06 
  -2  14  -1   16.01    1.16 
  -2 -14   1   14.00    1.07 
   2 -14  -1   14.86    1.16 
   2 -14  -1   16.67    1.13 
   2 -14  -1   15.22    1.18 
  -2  14  -1   17.68    1.34 
  -2  14  -1   15.37    1.12 
   2  14   1   14.42    1.13 
   3 -14   1   17.18    1.12 
  -3  14   1   15.61    1.15 
   3 -14   1   16.99    1.18 
  -3 -14  -1   16.29    1.18 
   3  14  -1   18.24    1.40 
   3 -14   1   18.60    1.34 
  -3 -14  -1   16.15    1.16 
  -3 -14  -1   17.27    1.12 
   3 -14   1   15.56    1.10 
  -3  14   1   16.93    1.32 
  -3  14   1   16.66    1.30 
  -3  14   1   16.01    1.25 
   3 -14   1   15.51    1.25 
  -3 -14  -1   18.45    1.21 
  -3 -14  -1   18.44    1.33 
   3  14  -1   15.25    1.19 
  -3 -14  -1   16.57    1.13 
   3 -14  -1   19.16    1.20 
  -3 -14   1   16.71    1.28 
  -3 -14   1   19.33    1.26 
  -3  14  -1   17.12    1.25 
   3  14   1   16.97    1.27 
   3  14   1   19.39    1.31 
  -3  14  -1   17.10    1.32 
  -3 -14   1   17.69    1.12 
   3  14   1   18.21    1.38 
  -3 -14   1   18.98    1.25 
   3 -14  -1   18.39    1.20 
  -3 -14   1   18.21    1.12 
   3 -14  -1   17.05    1.09 
  -3 -14   1   16.21    1.15 
  -3  14  -1   17.02    1.21 
   3 -14  -1   16.88    1.28 
   3 -14  -1   19.28    1.36 
  -3  14  -1   16.05    1.27 
   4 -14   1   25.95    1.47 
  -4 -14  -1   26.00    1.50 
   4 -14   1   28.82    1.75 
   4 -14   1   21.69    1.55 
  -4 -14  -1   24.93    1.49 
   4  14  -1   26.57    1.71 
  -4 -14  -1   23.25    1.38 
  -4  14   1   25.13    1.60 
   4 -14   1   25.19    1.46 
   4 -14   1   22.93    1.36 
  -4 -14  -1   26.87    1.66 
  -4  14   1   22.81    1.56 
  -4  14   1   23.49    1.43 
   4  14  -1   25.81    1.57 
  -4  14   1   24.64    1.60 
  -4 -14  -1   23.52    1.50 
  -4 -14   1   25.18    1.51 
   4  14   1   23.05    1.51 
   4 -14  -1   23.35    1.33 
   4 -14  -1   23.60    1.37 
   4  14   1   25.80    1.68 
  -4 -14   1   24.99    1.38 
   4 -14  -1   24.30    1.45 
  -4  14  -1   23.34    1.58 
  -4  14  -1   23.80    1.58 
  -4 -14   1   22.39    1.55 
  -4 -14   1   23.50    1.51 
   4 -14  -1   27.75    1.65 
  -4  14  -1   22.15    1.51 
  -4  14  -1   23.49    1.48 
   4 -14  -1   26.09    1.66 
  -5 -14  -1    0.86    0.42 
   5 -14   1    1.33    0.51 
  -5 -14  -1    0.56    0.38 
  -5 -14  -1    0.83    0.50 
   5 -14   1    1.11    0.43 
  -5  14   1    0.36    0.35 
   5 -14   1    1.09    0.43 
  -5  14   1    0.82    0.43 
   5  14  -1    1.07    0.44 
   5  14  -1    0.56    0.36 
   5 -14   1    0.82    0.40 
  -5 -14  -1    0.94    0.37 
  -5  14   1    1.48    0.50 
   5 -14   1    0.87    0.40 
   5 -14   1    0.85    0.46 
  -5  14   1    0.47    0.32 
  -5  14  -1    0.74    0.39 
  -5 -14   1    1.35    0.51 
   5  14   1    0.82    0.40 
  -5  14  -1    1.56    0.56 
   5 -14  -1    0.24    0.30 
  -5  14  -1    1.75    0.53 
   5 -14  -1    0.59    0.34 
  -5  14  -1    0.67    0.42 
   5  14   1    0.77    0.45 
   5 -14  -1    0.46    0.36 
   5 -14  -1    0.41    0.33 
  -5 -14   1    0.63    0.37 
   5 -14  -1    0.69    0.35 
   5 -14  -1    0.74    0.49 
   6  14  -1   16.10    1.30 
   6 -14   1   15.99    1.63 
  -6  14   1   16.17    1.22 
  -6 -14  -1   14.48    1.14 
   6 -14   1   16.59    1.17 
   6  14  -1   17.44    1.32 
  -6  14   1   15.12    1.24 
   6 -14   1   17.17    1.41 
  -6  14   1   18.17    1.41 
  -6 -14  -1   15.14    1.20 
  -6  14   1   15.73    1.61 
  -6 -14  -1   14.60    1.48 
   6 -14   1   15.52    1.13 
   6  14   1   16.06    1.58 
   6 -14  -1   16.48    1.64 
  -6  14  -1   16.27    1.29 
  -6  14  -1   16.37    1.27 
   6 -14  -1   16.53    1.13 
   6 -14  -1   16.17    1.66 
   6 -14  -1   14.90    1.20 
   6  14   1   15.41    1.53 
  -6  14  -1   15.98    1.65 
   6 -14  -1   17.01    1.10 
  -6  14  -1   17.24    1.67 
  -6 -14   1   18.30    1.33 
  -6 -14   1   15.13    1.49 
  -7  14   1    2.36    0.62 
   7  14  -1    2.68    0.67 
  -7 -14  -1    2.63    0.65 
   7 -14   1    2.07    0.56 
  -7 -14  -1    1.84    0.57 
   7 -14   1    1.35    0.56 
   7 -14   1    2.56    0.84 
   7  14  -1    2.19    0.60 
   7 -14   1    2.59    0.56 
  -7  14   1    2.29    0.66 
  -7  14   1    2.86    0.84 
   7 -14  -1    2.48    0.52 
  -7  14  -1    2.66    0.68 
  -7 -14   1    2.03    0.57 
  -7  14  -1    2.77    0.65 
   7  14   1    2.48    0.65 
  -7 -14   1    1.10    0.48 
  -7  14  -1    1.23    0.52 
   7 -14  -1    2.04    0.53 
   7 -14  -1    2.16    0.73 
   7 -14  -1    1.48    0.57 
   7  14   1    2.31    0.59 
  -8 -14  -1   48.86    2.55 
   8  14  -1   44.90    2.47 
  -8  14   1   48.79    2.64 
  -8  14   1   43.89    2.29 
   8 -14   1   43.59    2.09 
  -8  14   1   44.45    2.49 
   8 -14   1   48.03    2.64 
   8 -14   1   41.87    2.13 
   8 -14   1   41.62    2.57 
  -8  14  -1   47.53    2.39 
   8  14   1   42.32    2.44 
  -8 -14   1   45.67    2.42 
   8 -14  -1   42.94    2.00 
  -8  14  -1   46.08    2.62 
  -8 -14   1   47.20    2.54 
   8 -14  -1   48.43    2.60 
  -8  14  -1   53.96    2.66 
   8 -14  -1   49.65    2.70 
   8 -14  -1   46.81    2.15 
  -9  14   1    2.38    0.66 
   9  14  -1    1.57    0.59 
   9 -14   1    2.35    0.74 
  -9  14   1    2.06    0.78
[truncated: 4,226,406 more chars]
